# Supplementary material
Source: publisher site journal article supplement (https://www.dovepress.com/article/542713)
Supplement: Supplementary file 1 [file 542713%20%2509Supplementary%20file.pdf]

**Table S1.** The potential druggable genes in DGIdb v4.2.0

| Gene name | Entrez id | Interaction clai   | Interactio | Drug claim                         | Drug claim primary name        | Drug name                | Drug concept id      | Interaction group score |
|-----------|-----------|--------------------|------------|------------------------------------|--------------------------------|--------------------------|----------------------|-------------------------|
| A2M       | 2         | NCI                |            | COBALT                             | COBALT                         |                          |                      |                         |
| AADAT     | 51166     | TTD                |            | US10065972,US10065972, Example 281 |                                |                          |                      |                         |
| AAK1      | 22848     | GuideToPharmac     | inhibitor  | 223366123                          | BARICITINIB                    | BARICITINIB              | chembl:CHEMBL2105759 | 7.96                    |
| AANAT     | 15        | NCI                |            | FLUOXETIN                          | FLUOXETINE                     | FLUOXETINE               | chembl:CHEMBL41      | 1.41                    |
| ABAT      | 18        | PharmGKB           |            | valproic acid                      | valproic acid                  |                          |                      |                         |
| ABCA1     | 19        | PharmGKB           |            | pravastatin                        | pravastatin                    | PRAVASTATIN              | chembl:CHEMBL1144    | 0.91                    |
| ABCA4     | 24        | TTD                |            | StarGen                            | StarGen                        |                          |                      |                         |
| ABCA5     | 23461     | TdgClinicalTrial   |            | LIM-0705                           | LIM-0705                       | QUERCETIN-3'-O-PHOSPHATE | chembl:CHEMBL4297397 | 31.83                   |
| ABCB1     | 5243      | PharmGKB           |            | antiepileptics                     | antiepileptics                 |                          |                      |                         |
| ABCB11    | 8647      | DTC                |            | CHENODIOL                          | CHENODIOL                      | CHENODIOL                | chembl:CHEMBL240597  | 2.27                    |
| ABCB4     | 5244      | NCI                |            | VINBLASTIN                         | VINBLASTINE                    | VINBLASTINE              | chembl:CHEMBL159     | 0.61                    |
| ABCB5     | 340273    | PharmGKB           |            | haloperidol                        | haloperidol                    | HALOPERIDOL              | chembl:CHEMBL54      | 2.69                    |
| ABCC1     | 4363      | DTC                |            | NEVIRAPIN                          | NEVIRAPINE                     | NEVIRAPINE               | chembl:CHEMBL57      | 0.11                    |
| ABCC10    | 89845     | PharmGKB           |            | tenofovir                          | tenofovir                      | TENOFOVIR                | chembl:CHEMBL483     | 2.65                    |
| ABCC11    | 85320     | PharmGKB           |            | fluorouracil                       | fluorouracil                   | FLUOROURACIL             | chembl:CHEMBL185     | 1.21                    |
| ABCC2     | 1244      | PharmGKB           |            | tamoxifen                          | tamoxifen                      | TAMOXIFEN                | chembl:CHEMBL83      | 0.02                    |
| ABCC3     | 8714      | DTC                |            | EMTRICITABINE                      | EMTRICITABINE                  | EMTRICITABINE            | chembl:CHEMBL885     | 1.7                     |
| ABCC4     | 10257     | GuideToPharmac     | inhibitor  | 252827460                          | ESTRADIOL DISULFATE            |                          |                      |                         |
| ABCC5     | 10057     | GuideToPharmac     | inhibitor  | 178101454                          | SILDENAFIL                     | SILDENAFIL               | chembl:CHEMBL192     | 0.72                    |
| ABCC6     | 368       | NCI                |            | HEPARAN                            | SHEPARAN SULFATE               |                          |                      |                         |
| ABCC8     | 6833      | TTD                |            | Glibenclamid                       | Glibenclamide                  | GLYBURIDE                | chembl:CHEMBL472     | 2.08                    |
| ABCC9     | 10060     | ChemblInteractions |            | CHEMBL21                           | (NAMINIDIL                     | NAMINIDIL                | chembl:CHEMBL2105160 | 1.77                    |
| ABCG1     | 9619      | PharmGKB           |            | leucovorin                         | leucovorin                     | LEUCOVORIN               | chembl:CHEMBL1679    | 1.52                    |
| ABCG2     | 9429      | NCI                |            | ITRACONAZOLE                       | ITRACONAZOLE                   | ITRACONAZOLE             | chembl:CHEMBL64391   | 0.21                    |
| ABCG4     | 64137     | NCI                |            | HORMONES                           | HORMONES                       |                          |                      |                         |
| ABCG8     | 64241     | PharmGKB           |            | atorvastatin                       | atorvastatin                   | ATORVASTATIN             | chembl:CHEMBL1487    | 4.24                    |
| ABHD12    | 26090     | GuideToPharmac     | inhibitor  | 178101960                          | ORLISTAT                       | ORLISTAT                 | chembl:CHEMBL175247  | 6.37                    |
| ABHD6     | 57406     | TTD                |            | Piperazine ca                      | Piperazine carbamic compound 2 |                          |                      |                         |
| ABI1      | 10006     | PharmGKB           |            | dasatinib                          | dasatinib                      | DASATINIB                | chembl:CHEMBL1421    | 0.44                    |
| ABL1      | 25        | TEND               |            | DASATINIB                          | DASATINIB                      | DASATINIB                | chembl:CHEMBL1421    | 0.59                    |
| ABL2      | 27        | TEND               |            | DASATINIB                          | DASATINIB                      | DASATINIB                | chembl:CHEMBL1421    | 1.24                    |
| ABO       | 28        | PharmGKB           |            | Ace Inhibitor                      | Ace Inhibitors, Plain          |                          |                      |                         |
| ACACA     | 31        | GuideToPharmac     | inhibitor  | 252827541                          | COMPOUND 21 [PMID: 23981033]   |                          |                      |                         |
| ACACB     | 32        | GuideToPharmac     | inhibitor  | 178101963                          | TOFA                           |                          |                      |                         |
| ACADM     | 34        | NCI                |            | HORMONES                           | HORMONES                       |                          |                      |                         |
| ACADSB    | 36        | TdgClinicalTrial   |            | VALPROIC ACID                      | VALPROIC ACID                  |                          |                      |                         |
| ACAT1     | 38        | TEND               |            | SULFASALAZINE                      | SULFASALAZINE                  | SULFASALAZINE            | chembl:CHEMBL421     | 13.26                   |
| ACAT2     | 39        | GuideToPharmac     | inhibitor  | 381118860                          | K-604                          |                          |                      |                         |
| ACE       | 1636      | TdgClinicalTrial   |            | CANDOXATRIL                        | CANDOXATRIL                    | CANDOXATRIL              | chembl:CHEMBL35084   | 1.93                    |
| ACE2      | 59272     | GuideToPharmac     | inhibitor  | 223366196                          | MLN-4760                       | ORE-1001                 | chembl:CHEMBL429844  | 47.74                   |

|         |                                 |                                         |                      |                   |                      |       |
|---------|---------------------------------|-----------------------------------------|----------------------|-------------------|----------------------|-------|
| ACHE    | 43 TTD                          | 4-PAM deriv:4-PAM derivative 1          |                      |                   |                      |       |
| ACKR1   | 2532 TTD                        | AQ-13                                   | AQ-13                | AQ-13             | chembl:CHEMBL4297695 | 31.83 |
| ACKR3   | 57007 GuideToPharmac agonist    | 135652600 TC14012                       |                      |                   |                      |       |
| ACKR4   | 51554 GuideToPharmac agonist    | 135651677 CCL25                         |                      |                   |                      |       |
| ACLY    | 47 TTD                          | ETC-1002                                | ETC-1002             | BEMPEDOIC ACID    | chembl:CHEMBL3545313 | 95.48 |
| ACO1    | 48 NCI                          | ANTISERUM                               | ANTISERUM            |                   |                      |       |
| ACP1    | 52 DTC                          | GNF-PF-435:GNF-PF-4353                  |                      | CHEMBL527307      | chembl:CHEMBL527307  | 3.18  |
| ACP3    | 55 TdgClinicalTrial             | MVA-BN                                  | MVA-BN               |                   |                      |       |
| ACP5    | 54 NCI                          | STREPTOZC                               | STREPTOZOTOCIN       | STREPTOZOCIN      | chembl:CHEMBL1651906 | 0.69  |
| ACR     | 49 GuideToPharmac inhibitor     | 252166760 COMPOUND 9 [PMID: 3514912]    |                      |                   |                      |       |
| ACSS2   | 55902 PharmGKB                  | docetaxel                               | docetaxel            | DOCETAXEL         | chembl:CHEMBL92      | 0.27  |
| ACSS3   | 79611 PharmGKB                  | antidepressan                           | antidepressants      |                   |                      |       |
| ACTA1   | 58 TdgClinicalTrial             | THYMOSIN                                | THYMOSIN BETA-4      |                   |                      |       |
| ACTB    | 60 NCI                          | ETHINYLE                                | ETHINYLESTRADIOL     | ETHINYL ESTRADIOL | chembl:CHEMBL691     | 5.3   |
| ACTC1   | 70 NCI                          | DEXAMETH                                | DEXAMETHASONE        | DEXAMETHASONE     | chembl:CHEMBL384467  | 1.52  |
| ACTG1   | 71 PharmGKB                     | vincristine                             | vincristine          | VINCRISTINE       | chembl:CHEMBL90555   | 1.1   |
| ACTR2   | 10097 NCI                       | ETOPOSIDE                               | ETOPOSIDE            | ETOPOSIDE         | chembl:CHEMBL44657   | 2.45  |
| ACVR1   | 90 DTC                          | OSI-632                                 | OSI-632              | OSI-632           | chembl:CHEMBL253969  | 0.08  |
| ACVR1B  | 91 GuideToPharmac inhibitor     | 249565824 COMPOUND 13R [PMID: 23639540] |                      |                   |                      |       |
| ACVR1C  | 130399 GuideToPharmac inhibitor | 249565896 SB-431542                     |                      | SB-431542         | chembl:CHEMBL440084  | 7.07  |
| ACVR2A  | 92 TTD                          | BYM338                                  | BYM338               | BIMAGRUMAB        | chembl:CHEMBL3137353 | 31.83 |
| ACVR2B  | 93 ChemblInteractio antagonist  | CHEMBL313                               | BIMAGRUMAB           | BIMAGRUMAB        | chembl:CHEMBL3137353 | 31.83 |
| ACVRL1  | 94 GuideToPharmac inhibitor     | 249565824 COMPOUND 13R [PMID: 23639540] |                      |                   |                      |       |
| ACY3    | 91703 PharmGKB                  | atenolol                                | atenolol             | ATENOLOL          | chembl:CHEMBL24      | 1.87  |
| ACYP2   | 98 PharmGKB                     | cisplatin                               | cisplatin            | CISPLATIN         | chembl:CHEMBL11359   | 1.32  |
| AD5     | 8081 ChemblInteractio inhibitor | CHEMBL52                                | (SEMAGACESTAT        | SEMAGACESTAT      | chembl:CHEMBL520733  | 2.27  |
| ADA     | 100 NCI                         | 2,3-DIDEOX                              | 2,3-DIDEOXYADENOSINE |                   |                      |       |
| ADAM10  | 102 GuideToPharmac inhibitor    | 348353646 GI254023X                     |                      |                   |                      |       |
| ADAM12  | 8038 GuideToPharmac inhibitor   | 178103981 ILOMASTAT                     |                      | ILOMASTAT         | chembl:CHEMBL19611   | 4.9   |
| ADAM17  | 6868 GuideToPharmac inhibitor   | 178103981 ILOMASTAT                     |                      | ILOMASTAT         | chembl:CHEMBL19611   | 0.82  |
| ADAM33  | 80332 GuideToPharmac inhibitor  | 252166879 INCB3619                      |                      |                   |                      |       |
| ADAM8   | 101 GuideToPharmac inhibitor    | 252166879 INCB3619                      |                      |                   |                      |       |
| ADAM9   | 8754 GuideToPharmac inhibitor   | 178103981 ILOMASTAT                     |                      | ILOMASTAT         | chembl:CHEMBL19611   | 4.9   |
| ADAMTS1 | 9510 GuideToPharmac inhibitor   | 252166863 COMPOUND 12C [PMID: 16516466] |                      |                   |                      |       |
| ADAMTS4 | 9507 NCI                        | CHONDROI                                | CHONDROITIN SULFATE  |                   |                      |       |
| ADAMTS5 | 11096 GuideToPharmac inhibitor  | 252166754 COMPOUND 15C [PMID: 21536437] |                      |                   |                      |       |
| ADCY1   | 107 DTC                         | NSC-270718                              | NSC-270718           | CHEMBL401844      | chembl:CHEMBL401844  | 15.91 |
| ADCY10  | 55811 GuideToPharmac inhibitor  | 381744898 KH7                           |                      |                   |                      |       |
| ADCY2   | 108 PharmGKB                    | capecitabine                            | capecitabine         | CAPECITABINE      | chembl:CHEMBL1773    | 1.77  |
| ADCY5   | 111 DTC                         | NSC-270718                              | NSC-270718           | CHEMBL401844      | chembl:CHEMBL401844  | 31.83 |
| ADCY6   | 112 GuideToPharmac inhibitor    | 178101917 NKY80                         |                      |                   |                      |       |
| ADCY9   | 115 DTC                         | NSC-270718                              | NSC-270718           | CHEMBL401844      | chembl:CHEMBL401844  | 15.91 |

|             |                               |                                                     |                           |                      |       |
|-------------|-------------------------------|-----------------------------------------------------|---------------------------|----------------------|-------|
| ADCYAP1     | 116 NCI                       | STREPTOZCSTREPTOZOTOCIN                             | STREPTOZOCIN              | chembl:CHEMBL1651906 | 1.38  |
| ADCYAP1R1   | 117 GuideToPharmacagonist     | 135651849 PACAP-27                                  |                           |                      |       |
| ADD1        | 118 PharmGKB                  | bumetanide bumetanide                               | BUMETANIDE                | chembl:CHEMBL1072    | 1.82  |
| ADGRB1      | 575 GuideToPharmacagonist     | 135651545 PHOSPHATIDYLSERINE                        | PHOSPHATIDYL SERINE       | chembl:CHEMBL4297669 | 63.65 |
| ADGRG3      | 222487 GuideToPharmacagonist  | 178102517 BECLOMETASONE DIPROPIONATE                |                           |                      |       |
| ADGRL3      | 23284 PharmGKB                | nicotine nicotine                                   | NICOTINE                  | chembl:CHEMBL3       | 0.65  |
| ADGRV1      | 84059 PharmGKB                | opioids opioids                                     |                           |                      |       |
| ADH1A       | 124 TdgClinicalTrial          | FOMEPIZOLFOMEPIZOLE                                 | FOMEPIZOLE                | chembl:CHEMBL1308    | 39.78 |
| ADH1B       | 125 PharmGKB                  | acetaldehyde acetaldehyde                           | ACETALDEHYDE              | chembl:CHEMBL170365  | 5.3   |
| ADH1C       | 126 TdgClinicalTrial          | FOMEPIZOLFOMEPIZOLE                                 | FOMEPIZOLE                | chembl:CHEMBL1308    | 22.28 |
| ADH4        | 127 NCI                       | ETHANOL ETHANOL                                     | ALCOHOL                   | chembl:CHEMBL545     | 1.48  |
| ADH7        | 131 PharmGKB                  | anthracycline anthracyclines and related substances |                           |                      |       |
| ADIPOQ      | 9370 NCI                      | FENOFIBRAFENOFIBRATE                                | FENOFIBRATE               | chembl:CHEMBL672     | 0.88  |
| ADK         | 132 DTC                       | DABIGATR/DABIGATRAN                                 | DABIGATRAN                | chembl:CHEMBL48361   | 2.36  |
| ADM         | 133 NCI                       | PD-98059 PD-98059                                   | CHEMBL35482               | chembl:CHEMBL35482   | 0.49  |
| ADO         | 84890 PharmGKB                | hydrochlorothhydrochlorothiazide                    | HYDROCHLOROTHIAZIDE       | chembl:CHEMBL435     | 3.54  |
| ADORA1      | 134 DTC                       | PD-117915 PD-117915                                 | CHEMBL303124              | chembl:CHEMBL303124  | 2.6   |
| ADORA2A     | 135 TTD                       | TonapofyllincTonapofylline                          | TONAPOFYLLINE             | chembl:CHEMBL414157  | 0.61  |
| ADORA2A-AS1 | 646023 PharmGKB               | methotrexate methotrexate                           | METHOTREXATE              | chembl:CHEMBL34259   | 1.18  |
| ADORA2B     | 136 GuideToPharmac antagonist | 135651364 ZM-241385                                 | ZM-241385                 | chembl:CHEMBL113142  | 0.34  |
| ADORA3      | 140 GuideToPharmac antagonist | 178102242 ISTRADEFYLLINE                            | ISTRADEFYLLINE            | chembl:CHEMBL431770  | 0.4   |
| ADRA1A      | 148 TdgClinicalTrial          | ASENAPINEASENAPINE                                  | ASENAPINE                 | chembl:CHEMBL3187365 | 0.06  |
| ADRA1B      | 147 TdgClinicalTrial          | TAMSULOS TAMSULOSIN                                 | TAMSULOSIN                | chembl:CHEMBL836     | 1.22  |
| ADRA1D      | 146 TEND                      | DEBRISOQUDEBRISOQUIN                                | DEBRISOQUIN               | chembl:CHEMBL169901  | 0.45  |
| ADRA2A      | 150 TdgClinicalTrial          | AGN-214868AGN-214868                                | SENREBOTASE               | chembl:CHEMBL3137348 | 0.12  |
| ADRA2B      | 151 GuideToPharmac antagonist | 135651246 TERGURIDE                                 | TERGURIDE                 | chembl:CHEMBL73151   | 0.07  |
| ADRA2C      | 152 GuideToPharmac agonist    | 135650327 GUANFACINE                                | GUANFACINE                | chembl:CHEMBL862     | 0.11  |
| ADRB1       | 153 DTC                       | SALMETER/SALMETEROL                                 | SALMETEROL                | chembl:CHEMBL1263    | 0.35  |
| ADRB2       | 154 TdgClinicalTrial          | ALPRENOL(ALPRENOLOL                                 | ALPRENOLOL                | chembl:CHEMBL266195  | 1.84  |
| ADRB3       | 155 ChemblInteractioagonist   | CHEMBL679EPINEPHRINE                                | EPINEPHRINE               | chembl:CHEMBL679     | 0.06  |
| ADRM1       | 11047 DTC                     | BORTEZOMBORTEZOMIB                                  | BORTEZOMIB                | chembl:CHEMBL325041  | 0.53  |
| ADSS2       | 159 NCI                       | ALANOSINEALANOSINE                                  | ALANOSINE                 | chembl:CHEMBL452715  | 63.65 |
| AFP         | 174 NCI                       | ACTINOMY ACTINOMYCIN D                              |                           |                      |       |
| AGBL4       | 84871 PharmGKB                | ustekinumab ustekinumab                             | USTEKINUMAB               | chembl:CHEMBL1201835 | 6.37  |
| AGER        | 177 NCI                       | VITAMIN B12VITAMIN B12                              |                           |                      |       |
| AGRP        | 181 TTD                       | TTP435 TTP435                                       |                           |                      |       |
| AGT         | 183 NCI                       | QUINAPRIL QUINAPRIL                                 | QUINAPRIL                 | chembl:CHEMBL1592    | 6.06  |
| AGTR1       | 185 TdgClinicalTrial          | TASOSART/TASOSARTAN                                 | TASOSARTAN                | chembl:CHEMBL432162  | 10.39 |
| AGTR2       | 186 GuideToPharmac agonist    | 135651616 ANGIOTENSIN III                           |                           |                      |       |
| AHCY        | 191 GuideToPharmac inhibitor  | 178101808 3-DEAZAADENOSINE                          | CHEMBL202701              | chembl:CHEMBL202701  | 63.65 |
| AHR         | 196 DTC                       | 1-NAPHTHY1-NAPHTHYLSISOTHIOCYANATE                  | 1-NAPHTHYLSISOTHIOCYANATE | chembl:CHEMBL1381098 | 0.27  |
| AHRR        | 57491 NCI                     | TCDD TCDD                                           |                           |                      |       |

|         |                       |               |                                       |                   |                      |       |
|---------|-----------------------|---------------|---------------------------------------|-------------------|----------------------|-------|
| AICDA   | 57379 TTD             | JX-929        | JX-929                                |                   |                      |       |
| AIFM1   | 9131 NCI              | HSP70         | HSP70                                 |                   |                      |       |
| AIP     | 9049 NCI              | TCDD          | TCDD                                  |                   |                      |       |
| AK2     | 204 PharmGKB          | tenofovir     | tenofovir                             | TENOFOVIR         | chembl:CHEMBL483     | 5.3   |
| AK4     | 205 PharmGKB          | tenofovir     | tenofovir                             | TENOFOVIR         | chembl:CHEMBL483     | 5.3   |
| AKAP13  | 11214 PharmGKB        | haloperidol   | haloperidol                           | HALOPERIDOL       | chembl:CHEMBL54      | 1.79  |
| AKR1A1  | 10327 PharmGKB        | doxorubicin   | doxorubicin                           | DOXORUBICIN       | chembl:CHEMBL53463   | 1.35  |
| AKR1B1  | 231 TTD               | Ovine cortico | Ovine corticotropin-releasing hormone |                   |                      |       |
| AKR1B10 | 57016 DTC             | TOLRESTAT     | TOLRESTAT                             | TOLRESTAT         | chembl:CHEMBL436     | 23.87 |
| AKR1C1  | 1645 DTC              | 2-(4-CHLOR    | 2-(4-CHLOROBENZYLIDENE)CHOLIC ACID    | CHEMBL562352      | chembl:CHEMBL562352  | 25.46 |
| AKR1C2  | 1646 TdgClinicalTrial | URSODEOX      | URSODEOXYCHOLIC ACID                  |                   |                      |       |
| AKR1C3  | 8644 TTD              | ASP-9521      | ASP-9521                              |                   |                      |       |
| AKR1C4  | 1109 PharmGKB         | daunorubicin  | daunorubicin                          | DAUNORUBICIN      | chembl:CHEMBL178     | 0.99  |
| AKR1D1  | 6718 PharmGKB         | cholic acid   | cholic acid                           |                   |                      |       |
| AKR7A2  | 8574 PharmGKB         | daunorubicin  | daunorubicin                          | DAUNORUBICIN      | chembl:CHEMBL178     | 0.99  |
| AKT1    | 207 GuideToPharmac    | inhibitor     | 178101884 GSK690693                   | GSK-690693        | chembl:CHEMBL494089  | 0.08  |
| AKT1S1  | 84335 DTC             | GEDATOLIS     | GEDATOLISIB                           | GEDATOLISIB       | chembl:CHEMBL592445  | 1.1   |
| AKT2    | 208 ChemblInteractio  | inhibitor     | CHEMBL217                             | IPATASERTIB       | chembl:CHEMBL2177390 | 1.73  |
| AKT3    | 10000 GuideToPharmac  | inhibitor     | 249565578                             | IPATASERTIB       | chembl:CHEMBL2177390 | 1.73  |
| ALAD    | 210 TTD               | Aminolevulir  | Aminolevulinic acid hci               |                   |                      |       |
| ALB     | 213 TTD               | Sodium laury  | Sodium lauryl sulfate                 |                   |                      |       |
| ALCAM   | 214 CIViC             | FLUOROUR      | FLUOROURACIL                          | FLUOROURACIL      | chembl:CHEMBL185     | 1.21  |
| ALDH1A1 | 216 DTC               | ROTTLERIN     | ROTTLERIN                             | ROTTLERIN         | chembl:CHEMBL34241   | 0.01  |
| ALDH1A2 | 8854 NCI              | RETINOL       | RETINOL                               | RETINOL           | chembl:CHEMBL986     | 3.03  |
| ALDH1L1 | 10840 PharmGKB        | l-methionine  | l-methionine                          | METHIONINE        | chembl:CHEMBL42336   | 12.73 |
| ALDH2   | 217 TTD               | ANS-6637      | ANS-6637                              |                   |                      |       |
| ALDH3A1 | 218 NCI               | DISULFIRAM    | DISULFIRAM                            | DISULFIRAM        | chembl:CHEMBL964     | 0.54  |
| ALDH3A2 | 224 TTD               | Disulfram     | Disulfram                             | DISULFIRAM        | chembl:CHEMBL964     | 1.63  |
| ALDH5A1 | 7915 ChemblInteractio | inhibitor     | CHEMBL433                             | VALPROATE SODIUM  | chembl:CHEMBL433     | 10.61 |
| ALDH7A1 | 501 TTD               | M-518101      | M-518101                              | PEFCALCITOL       | chembl:CHEMBL3989862 | 31.83 |
| ALG10   | 84920 PharmGKB        | gemcitabine   | gemcitabine                           | GEMCITABINE       | chembl:CHEMBL888     | 1.57  |
| ALK     | 238 MyCancerGenon     | inhibitor     | ASP3026                               | ASP3026           | chembl:CHEMBL3545360 | 2.51  |
| ALOX12  | 239 DTC               | MERCURIC      | MERCURIC CHLORIDE                     | MERCURIC CHLORIDE | chembl:CHEMBL1374360 | 0.15  |
| ALOX15  | 246 GuideToPharmac    | inhibitor     | 381744944                             | ML351             |                      |       |
| ALOX15B | 247 DTC               | E324          | E324                                  | E324              | chembl:CHEMBL172064  | 0.08  |
| ALOX5   | 240 TTD               | SKF-105809    | SKF-105809                            |                   |                      |       |
| ALOX5AP | 241 TdgClinicalTrial  | DG031         | DG031                                 |                   |                      |       |
| ALPG    | 251 DTC               | NSC-353720    | NSC-353720                            | CHEMBL1408276     | chembl:CHEMBL1408276 | 0.28  |
| ALPI    | 248 DTC               | TIOXOLONI     | TIOXOLONE                             | TIOXOLONE         | chembl:CHEMBL442687  | 0.75  |
| ALPL    | 249 DTC               | 5,7,3',5'-TET | 5,7,3',5'-TETRAHYDROXYIC              | CHEMBL307893      | chembl:CHEMBL307893  | 0.21  |
| ALPP    | 250 NCI               | BETA-ADRE     | BETA-ADRENERGIC ANTAGONIST            |                   |                      |       |
| AMACR   | 23600 PharmGKB        | cholic acid   | cholic acid                           |                   |                      |       |

|          |                               |                |                             |                          |                      |       |
|----------|-------------------------------|----------------|-----------------------------|--------------------------|----------------------|-------|
| AMD1     | 262 TTD                       | ORG 34517/2    | ORG 34517/34850             |                          |                      |       |
| AMH      | 268 NCI                       | DES            | DES                         | DIETHYLSTILBESTROL       | chembl:CHEMBL411     | 3.18  |
| AMHR2    | 269 PharmGKB                  | metformin      | metformin                   | METFORMIN                | chembl:CHEMBL1431    | 5.03  |
| AMOT     | 154796 DTC                    | ROXITHROM      | ROXITHROMYCIN               | ROXITHROMYCIN            | chembl:CHEMBL1214185 | 14.14 |
| AMPD1    | 270 PharmGKB                  | methotrexate   | methotrexate                | METHOTREXATE             | chembl:CHEMBL34259   | 1.77  |
| AMY2A    | 279 TEND                      | ACARBOSE       | ACARBOSE                    | ACARBOSE                 | chembl:CHEMBL1566    | 18.19 |
| ANGPT1   | 284 ClarityFoundationClinical | TREBANINI      | TREBANINIB                  |                          |                      |       |
| ANGPT2   | 285 TTD                       | CVX-060        | CVX-060                     |                          |                      |       |
| ANGPTL3  | 27329 TTD                     | AKCEA-AN       | AKCEA-ANGPTL3-LRX           | VUPANORSEN               | chembl:CHEMBL4298197 | 31.83 |
| ANKFN1   | 162282 PharmGKB               | hydrochlorotl  | hydrochlorothiazide         | HYDROCHLOROTHIAZIDE      | chembl:CHEMBL435     | 1.77  |
| ANKK1    | 255239 PharmGKB               | prochlorperaz  | prochlorperazine            | PROCHLORPERAZINE         | chembl:CHEMBL728     | 0.44  |
| ANKRD30B | 374860 PharmGKB               | corticosteroid | corticosteroids             |                          |                      |       |
| ANKS1B   | 56899 PharmGKB                | ethanol        | ethanol                     | ALCOHOL                  | chembl:CHEMBL545     | 0.37  |
| ANO1     | 55107 GuideToPharmac          | blocker        | 178100996 DIDS              |                          |                      |       |
| ANO2     | 57101 PharmGKB                | duloxetine     | duloxetine                  | DULOXETINE               | chembl:CHEMBL1175    | 6.37  |
| ANPEP    | 290 NCI                       | RECOMBIN       | RECOMBINANT ERYTHROPOIETIN  |                          |                      |       |
| ANXA1    | 301 TEND                      | RIMEXOLO       | RIMEXOLONE                  | RIMEXOLONE               | chembl:CHEMBL1200617 | 0.64  |
| ANXA2    | 302 DTC                       | N-ETHYLM       | N-ETHYLMALEIMIDE            | N-ETHYLMALEIMIDE         | chembl:CHEMBL8211    | 12.73 |
| ANXA5    | 308 TTD                       | Diannexin      | Diannexin                   |                          |                      |       |
| AOAH     | 313 GuideToPharmac            | inhibitor      | 252166807 JZL195            |                          |                      |       |
| AOC3     | 8639 GuideToPharmac           | inhibitor      | 178103840 PHENELZINE        | PHENELZINE               | chembl:CHEMBL1089    | 5.71  |
| AOPEP    | 84909 ChemblInteractio        | inhibitor      | CHEMBL21(TOSEDOSTAT         | TOSEDOSTAT               | chembl:CHEMBL2103847 | 3.35  |
| AOX1     | 316 TTD                       | Menadione      | Menadione                   | MENADIONE                | chembl:CHEMBL590     | 0.45  |
| APAF1    | 317 DTC                       | BENZETHO       | BENZETHONIUM CHLORIDE       | BENZETHONIUM CHLORIDE    | chembl:CHEMBL221753  | 0.1   |
| APBA1    | 320 DTC                       | HESPERIDIN     | HESPERIDIN                  | HESPERIDIN               | chembl:CHEMBL449317  | 1.41  |
| APBB1    | 322 TTD                       | Trimidox       | Trimidox                    | TRIMETHOPRIM/SULFADOXINE | wikidata:Q7842230    | 10.61 |
| APC      | 324 JAX-CKB                   | K-756          | K-756                       |                          |                      |       |
| APCS     | 325 TTD                       | GSK2398852     | GSK2398852                  | DEZAMIZUMAB              | chembl:CHEMBL4297966 | 63.65 |
| APEH     | 327 GuideToPharmac            | inhibitor      | 252166764 ARI-3099          |                          |                      |       |
| APEX1    | 328 DTC                       | CARMINE        | CARMINE                     | CARMINE                  | chembl:CHEMBL1366408 | 0.03  |
| APH1A    | 51107 TTD                     | PMID283502     | PMID28350212-Compound-15    |                          |                      |       |
| APH1B    | 83464 DTC                     | LY-411575      | LY-411575                   | CHEMBL392068             | chembl:CHEMBL392068  | 3.54  |
| APLF     | 200558 PharmGKB               | Platinum con   | Platinum compounds          |                          |                      |       |
| APLN     | 8862 NCI                      | CYCLOOXY       | CYCLOOXYGENASE INHIBITOR    |                          |                      |       |
| APLNR    | 187 TTD                       | AMG 986        | AMG 986                     |                          |                      |       |
| APOA1    | 335 NCI                       | PROTEIN SY     | PROTEIN SYNTHESIS INHIBITOR |                          |                      |       |
| APOA2    | 336 NCI                       | RETINOIDS      | RETINOIDS                   |                          |                      |       |
| APOA5    | 116519 PharmGKB               | simvastatin    | simvastatin                 | SIMVASTATIN              | chembl:CHEMBL1064    | 0.59  |
| APOB     | 338 NCI                       | ETHANOL        | ETHANOL                     | ALCOHOL                  | chembl:CHEMBL545     | 0.08  |
| APOBEC3A | 200315 DTC                    | GNF-PF-331     | GNF-PF-3314                 | CHEMBL582287             | chembl:CHEMBL582287  | 1.25  |
| APOBEC3B | 9582 PharmGKB                 | corticosteroid | corticosteroids             |                          |                      |       |
| APOBEC3F | 200316 DTC                    | GNF-PF-371     | GNF-PF-3716                 | CHEMBL609606             | chembl:CHEMBL609606  | 0.18  |

|          |                        |                                                                |                 |                      |       |
|----------|------------------------|----------------------------------------------------------------|-----------------|----------------------|-------|
| APOBEC3G | 60489 DTC              | NSC-50690 NSC-50690                                            | CHEMBL1388703   | chembl:CHEMBL1388703 | 0.18  |
| APOC3    | 345 TTD                | ISIS-APOCIIISIS-APOCIIRx                                       |                 |                      |       |
| APOD     | 347 NCI                | RETINOIDS RETINOIDS                                            |                 |                      |       |
| APOE     | 348 NCI                | PREDNISONPREDNISON                                             | PREDNISON       | chembl:CHEMBL635     | 0.23  |
| APP      | 351 DTC                | GENTIAN V GENTIAN VIOLET                                       | GENTIAN VIOLET  | chembl:CHEMBL64894   | 0.12  |
| APRT     | 353 NCI                | TPA TPA                                                        | ALTEPLASE       | chembl:CHEMBL1201593 | 6.7   |
| AQP1     | 358 TTD                | Vitamin C Vitamin C                                            |                 |                      |       |
| AQP10    | 89872 GuideToPharmac   | inhibitor 178101032 HG2+                                       |                 |                      |       |
| AQP2     | 359 GuideToPharmac     | inhibitor 178101032 HG2+                                       |                 |                      |       |
| AQP3     | 360 GuideToPharmac     | inhibitor 381118898 AUPHEN                                     | AUPHEN          | chembl:CHEMBL118385  | 31.83 |
| AQP4     | 361 DTC                | ZONISAMIDZONISAMIDE                                            | ZONISAMIDE      | chembl:CHEMBL750     | 0.69  |
| AQP5     | 362 GuideToPharmac     | inhibitor 178101032 HG2+                                       |                 |                      |       |
| AQP6     | 363 GuideToPharmac     | activator 178101032 HG2+                                       |                 |                      |       |
| AQP7     | 364 GuideToPharmac     | inhibitor 381118898 AUPHEN                                     | AUPHEN          | chembl:CHEMBL118385  | 15.91 |
| AQP8     | 343 GuideToPharmac     | inhibitor 178101032 HG2+                                       |                 |                      |       |
| AQP9     | 366 NCI                | HORMONESHORMONES                                               |                 |                      |       |
| AR       | 367 DTC                | FLUCINOLFLUCINOLONE ACETONFLUCINOLONE ACETONIDE                |                 | chembl:CHEMBL989     | 0.04  |
| ARAF     | 369 PharmGKB           | sorafenib sorafenib                                            | SORAFENIB       | chembl:CHEMBL1336    | 0.68  |
| ARAP2    | 116984 PharmGKB        | Tumor necrosTumor necrosis factor alpha (TNF-alpha) inhibitors |                 |                      |       |
| AREG     | 374 PharmGKB           | panitumumabpanitumumab                                         | PANITUMUMAB     | chembl:CHEMBL1201827 | 2.42  |
| ARF6     | 382 NCI                | INSULIN INSULIN                                                | INSULIN         | chembl:CHEMBL1201631 | 2.5   |
| ARG1     | 383 PharmGKB           | sodium benzcsodium benzoate / sodium phenylacetate             |                 |                      |       |
| ARG2     | 384 TTD                | DifluoromethDifluoromethylornithine                            |                 |                      |       |
| ARHGAP12 | 94134 PharmGKB         | methylphenidmethylphenidate                                    | METHYLPHENIDATE | chembl:CHEMBL796     | 2.83  |
| ARHGEF28 | 64283 PharmGKB         | methylphenidmethylphenidate                                    | METHYLPHENIDATE | chembl:CHEMBL796     | 2.83  |
| ARID1A   | 8289 CIViC             | NIVOLUMA NIVOLUMAB                                             | NIVOLUMAB       | chembl:CHEMBL2108738 | 1.7   |
| ARID5B   | 84159 PharmGKB         | haloperidol haloperidol                                        | HALOPERIDOL     | chembl:CHEMBL54      | 0.9   |
| ARMS2    | 387715 PharmGKB        | bevacizumab bevacizumab                                        | BEVACIZUMAB     | chembl:CHEMBL1201583 | 4.11  |
| ARNT     | 405 NCI                | HYDROCORHYDROCORTISONE                                         | HYDROCORTISONE  | chembl:CHEMBL389621  | 1.12  |
| ARRB1    | 408 DTC                | EBSELEN EBSELEN                                                | EBSELEN         | chembl:CHEMBL51085   | 1.82  |
| ARRB2    | 409 PharmGKB           | tramadol tramadol                                              | TRAMADOL        | chembl:CHEMBL1237044 | 1.77  |
| ARSA     | 410 DTC                | RO-410960 RO-410960                                            | CHEMBL1256291   | chembl:CHEMBL1256291 | 0.28  |
| ARSB     | 411 TTD                | Galsulfase Galsulfase                                          | GALSULFASE      | chembl:CHEMBL1201822 | 31.83 |
| ASGR1    | 432 TTD                | AMG 529 AMG 529                                                |                 |                      |       |
| ASIC1    | 41 TdgClinicalTrial    | P-552 P-552                                                    |                 |                      |       |
| ASIC2    | 40 GuideToPharmac      | blocker 135652732 CD2+                                         |                 |                      |       |
| ASIC3    | 9311 GuideToPharmac    | blocker 135649936 AMILORIDE                                    | AMILORIDE       | chembl:CHEMBL945     | 0.57  |
| ASIC4    | 55515 TdgClinicalTrial | P-552 P-552                                                    |                 |                      |       |
| ASL      | 435 PharmGKB           | sodium benzcsodium benzoate / sodium phenylacetate             |                 |                      |       |
| ASNS     | 440 CIViC              | ASPARAGINASPARAGINASE                                          | ASPARAGINASE    | chembl:CHEMBL2108989 | 25.46 |
| ASPG     | 374569 TTD             | Calaspargase Calaspargase pegol                                |                 |                      |       |
| ASPH     | 444 PharmGKB           | warfarin warfarin                                              | WARFARIN        | chembl:CHEMBL1464    | 3.54  |

|          |                      |                |                                        |                      |       |
|----------|----------------------|----------------|----------------------------------------|----------------------|-------|
| ASS1     | 445 CIViC            | CHLOROQU       | CHLOROQUINE                            | chembl:CHEMBL76      | 5.3   |
| ASXL1    | 171023 JAX-CKB       | N/A            | N/A                                    |                      |       |
| ATAD2    | 29028 GuideToPharmac | inhibitor      | 252827390 COMPOUND 33 [PMID: 26230603] |                      |       |
| ATAD2B   | 54454 GuideToPharmac | inhibitor      | 336446907 GSK8814                      |                      |       |
| ATAD5    | 79915 DTC            | DOMPERID       | DOMPERIDONE                            | chembl:CHEMBL219916  | 0.04  |
| ATAT1    | 79969 PharmGKB       | gemcitabine    | gemcitabine                            | chembl:CHEMBL888     | 0.79  |
| ATF2     | 1386 NCI             | 2-METHOX       | 2-METHOXYESTRADIOL                     | chembl:CHEMBL299613  | 4.24  |
| ATF3     | 467 NCI              | PROGESTE       | PROGESTERONE                           | chembl:CHEMBL103     | 1.77  |
| ATF4     | 468 NCI              | VITAMIN E      | VITAMIN E                              |                      |       |
| ATG16L1  | 55054 PharmGKB       | adalimumab     | adalimumab                             | chembl:CHEMBL1201580 | 7.49  |
| ATG4B    | 23192 DTC            | TOLFENAM       | TOLFENAMIC ACID                        | chembl:CHEMBL121626  | 0.54  |
| ATG5     | 9474 PharmGKB        | adalimumab     | adalimumab                             | chembl:CHEMBL1201580 | 7.49  |
| ATIC     | 471 NCI              | FOLIC ACID     | FOLIC ACID                             |                      |       |
| ATM      | 472 PharmGKB         | metformin      | metformin                              | chembl:CHEMBL1431    | 0.06  |
| ATP10A   | 57194 PharmGKB       | duloxetine     | duloxetine                             | chembl:CHEMBL1175    | 6.37  |
| ATP1A1   | 476 TdgClinicalTrial | ISTAROXI       | ISTAROXIME                             | chembl:CHEMBL2093999 | 5.3   |
| ATP1A2   | 477 PharmGKB         | olanzapine     | olanzapine                             | chembl:CHEMBL715     | 0.19  |
| ATP1A3   | 478 ChemblInteractio | inhibitor      | CHEMBL17: DIGOXIN                      | chembl:CHEMBL1751    | 0.47  |
| ATP1A4   | 480 ChemblInteractio | inhibitor      | CHEMBL16: DESLANOSIDE                  | chembl:CHEMBL1614    | 1.77  |
| ATP1B1   | 481 ChemblInteractio | inhibitor      | CHEMBL17: DIGOXIN                      | chembl:CHEMBL1751    | 0.47  |
| ATP1B2   | 482 ChemblInteractio | inhibitor      | CHEMBL16: DESLANOSIDE                  | chembl:CHEMBL1614    | 1.77  |
| ATP1B3   | 483 ChemblInteractio | inhibitor      | CHEMBL35: ACETYLDIGITOXIN              | chembl:CHEMBL3545057 | 1.99  |
| ATP2A1   | 487 PharmGKB         | celecoxib      | celecoxib                              | chembl:CHEMBL118     | 0.22  |
| ATP2A2   | 488 PharmGKB         | celecoxib      | celecoxib                              | chembl:CHEMBL118     | 0.66  |
| ATP2A3   | 489 PharmGKB         | celecoxib      | celecoxib                              | chembl:CHEMBL118     | 1.99  |
| ATP2B1   | 490 PharmGKB         | Antihyperten:  | Antihypertensives                      |                      |       |
| ATP2C1   | 27032 TEND           | ENFLURAN       | ENFLURANE                              | chembl:CHEMBL1257    | 2.05  |
| ATP4A    | 495 TEND             | PANTOPRA:      | PANTOPRAZOLE                           | chembl:CHEMBL1502    | 4.55  |
| ATP4B    | 496 ChemblInteractio | inhibitor      | CHEMBL12: (DEXLANSOPRAZOLE)            | chembl:CHEMBL1201863 | 2.12  |
| ATP5F1D  | 513 TdgClinicalTrial | ENFLURAN       | ENFLURANE                              | chembl:CHEMBL1257    | 1.23  |
| ATP5F1E  | 514 PharmGKB         | glucocorticoi: | glucocorticoids                        |                      |       |
| ATP6V1B2 | 526 GuideToPharmac   | inhibitor      | 252827539 ENOXACIN                     | chembl:CHEMBL826     | 31.83 |
| ATP7A    | 538 NCI              | CARBOPLA:      | CARBOPLATIN                            | chembl:CHEMBL1351    | 0.27  |
| ATP7B    | 540 NCI              | CARBOPLA:      | CARBOPLATIN                            | chembl:CHEMBL1351    | 0.64  |
| ATR      | 545 TTD              | M4344          | M4344                                  |                      |       |
| ATRX     | 546 JAX-CKB          | Gemcitabine    | Gemcitabine                            | chembl:CHEMBL888     | 0.17  |
| ATXN1L   | 342371 CIViC         | TRAMETINI      | TRAMETINIB                             | chembl:CHEMBL2103875 | 1.01  |
| ATXN2    | 6311 DTC             | TCMDC-125      | TCMDC-125298                           | chembl:CHEMBL581152  | 0.04  |
| AURKA    | 6790 MyCancerGenon   | inhibitor      | ALISERTIB                              | chembl:CHEMBL483158  | 0.24  |
| AURKB    | 9212 DTC             | ZM-447439      | ZM-447439                              | chembl:CHEMBL202721  | 0.06  |
| AURKC    | 6795 GuideToPharmac  | inhibitor      | 178102666 SU6656                       |                      |       |
| AVPR1A   | 552 GuideToPharmac   | antagonist     | 178100705 D(CH2)5[TYR(ME)2,ARG8]VP     |                      |       |

|          |        |                    |            |               |                                                            |                       |                      |       |
|----------|--------|--------------------|------------|---------------|------------------------------------------------------------|-----------------------|----------------------|-------|
| AVPR1B   | 553    | GuideToPharmac     | antagonist | 135652123     | D[PEN1, TYR(ME)2]AVP                                       |                       |                      |       |
| AVPR2    | 554    | GuideToPharmac     | antagonist | 135652465     | SKF-105494                                                 |                       |                      |       |
| AXIN1    | 8312   | DTC                |            | (+/-)-HYDNC   | (+/-)-HYDNOCARPIN                                          | CHEMBL91638           | chembl:CHEMBL91638   | 63.65 |
| AXIN2    | 8313   | PharmGKB           |            | Platinum con  | Platinum compounds                                         |                       |                      |       |
| AXL      | 558    | DTC                |            | DASATINIB     | DASATINIB                                                  | DASATINIB             | chembl:CHEMBL1421    | 0.03  |
| B2M      | 567    | NCI                |            | AMIKACIN      | AMIKACIN                                                   | AMIKACIN              | chembl:CHEMBL177     | 8.49  |
| B3GAT1   | 27087  | NCI                |            | CHONDROI      | CHONDROITIN SULFATE                                        |                       |                      |       |
| B4GALNT1 | 2583   | MyCancerGenom      | antibody   | DINUTUXIM     | DINUTUXIMAB                                                | DINUTUXIMAB           | chembl:CHEMBL3137342 | 31.83 |
| B4GALT2  | 8704   | PharmGKB           |            | aspirin       | aspirin                                                    | ASPIRIN               | chembl:CHEMBL25      | 0.44  |
| BACE1    | 23621  | DTC                |            | SOPHORAFLA    | SOPHORAFLAVANONE G                                         | SOPHORAFLAVANONE G    | chembl:CHEMBL243148  | 7.07  |
| BACE2    | 25825  | GuideToPharmac     | inhibitor  | 178103154     | EXAMPLE 98 [WO2011020806]                                  |                       |                      |       |
| BACH1    | 571    | PharmGKB           |            | isoniazid     | isoniazid                                                  | ISONIAZID             | chembl:CHEMBL64      | 14.69 |
| BAD      | 572    | DTC                |            | RUBOXISTA     | RUBOXISTAURIN                                              | RUBOXISTAURIN         | chembl:CHEMBL91829   | 9.09  |
| BAG6     | 7917   | PharmGKB           |            | carbamazepir  | carbamazepine                                              | CARBAMAZEPINE         | chembl:CHEMBL108     | 2.71  |
| BAK1     | 578    | DTC                |            | KERACYAN      | KERACYANIN                                                 | KERACYANIN            | chembl:CHEMBL505251  | 18.19 |
| BAP1     | 8314   | CIViC              |            | APITOLISIB    | APITOLISIB                                                 | APITOLISIB            | chembl:CHEMBL1922094 | 0.88  |
| BARD1    | 580    | CIViC              |            | APITOLISIB    | APITOLISIB                                                 | APITOLISIB            | chembl:CHEMBL1922094 | 1.06  |
| BAX      | 581    | NCI                |            | PREDNISOL     | PREDNISOLONE                                               | PREDNISOLONE          | chembl:CHEMBL131     | 0.1   |
| BAZ2A    | 11176  | GuideToPharmac     | inhibitor  | 252166772     | BAZ2-ICR                                                   |                       |                      |       |
| BAZ2B    | 29994  | DTC                |            | ELLIPTECIN    | ELLIPTECINE                                                | ELLIPTECINE           | chembl:CHEMBL123     | 0.01  |
| BBOX1    | 8424   | DTC                |            | EBSELEN       | EBSELEN                                                    | EBSELEN               | chembl:CHEMBL51085   | 1.21  |
| BCAR1    | 9564   | PharmGKB           |            | celecoxib     | celecoxib                                                  | CELECOXIB             | chembl:CHEMBL118     | 1.99  |
| BCAR3    | 8412   | NCI                |            | ANTIESTRO     | ANTIESTROGEN                                               |                       |                      |       |
| BCAT2    | 587    | GuideToPharmac     | inhibitor  | 315661169     | COMPOUND 27 [PMID: 26938474]                               |                       |                      |       |
| BCHE     | 590    | TTD                |            | RVT-103+R     | RVT-103+RVT-104                                            |                       |                      |       |
| BCL2     | 596    | NCI                |            | HYDROQUI      | HYDROQUINONE                                               | HYDROQUINONE          | chembl:CHEMBL537     | 0.17  |
| BCL2A1   | 597    | TTD                |            | Apogossypol   | Apogossypolone                                             |                       |                      |       |
| BCL2L1   | 598    | TTD                |            | Indole-based  | Indole-based analog 2                                      |                       |                      |       |
| BCL2L10  | 10017  | ChemblInteractio   | inhibitor  | CHEMBL21      | (OBATOCLAX MESYLATE                                        | OBATOCLAX MESYLATE    | chembl:CHEMBL2107358 | 10.61 |
| BCL2L11  | 10018  | CIViC              |            | EPIDERMAI     | EPIDERMAL GROWTH FACTOR RECEPTOR TYROSINE KINASE INHIBITOR |                       |                      |       |
| BCL2L2   | 599    | TALC               | inhibitor  | NAVITOC       | NAVITOCCLAX                                                | NAVITOCCLAX           | chembl:CHEMBL443684  | 2.65  |
| BCL6     | 604    | NCI                |            | FENRETINI     | FENRETINIDE                                                | FENRETINIDE           | chembl:CHEMBL7301    | 4.9   |
| BCOR     | 54880  | JAX-CKB            |            | N/A           | N/A                                                        |                       |                      |       |
| BCORL1   | 63035  | JAX-CKB            |            | N/A           | N/A                                                        |                       |                      |       |
| BCR      | 613    | PharmGKB           |            | ponatinib     | ponatinib                                                  | PONATINIB             | chembl:CHEMBL1171837 | 0.79  |
| BDKRB1   | 623    | ChemblInteractio   | antagonist | CHEMBL35      | BI113823                                                   | BI113823              | chembl:CHEMBL3545386 | 10.61 |
| BDKRB2   | 624    | TEND               |            | ICATIBANT     | ICATIBANT                                                  | ICATIBANT             | chembl:CHEMBL2028850 | 14.69 |
| BDNF     | 627    | NCI                |            | CAPSAICIN     | CAPSAICIN                                                  | CAPSAICIN             | chembl:CHEMBL294199  | 0.12  |
| BDNF-AS  | 497258 | PharmGKB           |            | antipsychotic | antipsychotics                                             |                       |                      |       |
| BGLAP    | 632    | NCI                |            | METHIMAZ      | METHIMAZOLE                                                | METHIMAZOLE           | chembl:CHEMBL1515    | 0.31  |
| BHLHE40  | 8553   | NCI                |            | TRICHOSTA     | TRICHOSTATIN A                                             |                       |                      |       |
| BHMT     | 635    | ChemblInteractions |            | CHEMBL12      | (BETAINE HYDROCHLORI                                       | BETAINE HYDROCHLORIDE | chembl:CHEMBL1201130 | 21.22 |

|         |       |                         |                                 |                                              |                           |                      |       |
|---------|-------|-------------------------|---------------------------------|----------------------------------------------|---------------------------|----------------------|-------|
| BHMT2   | 23743 | ChemblInteractions      | CHEMBL12(BETAINE HYDROCHLORIDE) | BETAINE HYDROCHLORIDE                        | chembl:CHEMBL1201130      | 21.22                |       |
| BIRC2   | 329   | TTD                     | PMID259809                      | PMID25980951-Compound-1                      |                           |                      |       |
| BIRC3   | 330   | GuideToPharmac          | inhibitor                       | 252827512 SM-122                             | CHEMBL481422              | chembl:CHEMBL481422  | 3.03  |
| BIRC5   | 332   | ClarityFoundationBiomar |                                 | PACLITAXEPACLITAXEL                          | PACLITAXEL                | chembl:CHEMBL428647  | 0.07  |
| BIRC7   | 79444 | GuideToPharmac          | antagonist                      | 223366066 GDC-0152                           | GDC-0152                  | chembl:CHEMBL2063869 | 5.3   |
| BLK     | 640   | GuideToPharmac          | inhibitor                       | 249565816 COMPOUND 2 [PMID: 15546730]        |                           |                      |       |
| BLM     | 641   | DTC                     |                                 | 9,10-PHENA 9,10-PHENANTHRENEQUINONE          |                           | chembl:CHEMBL51931   | 0.02  |
| BLVRA   | 644   | TTD                     |                                 | Ursodeoxych Ursodeoxycholic acid             |                           |                      |       |
| BLVRB   | 645   | PharmGKB                |                                 | methylene blmethylene blue                   |                           |                      |       |
| BMP1    | 649   | GuideToPharmac          | inhibitor                       | 252166763 COMPOUND 2 [PMID: 11934595]        |                           |                      |       |
| BMP10   | 27302 | ChemblInteractio        | inhibitor                       | CHEMBL21(Delantercept                        | DALANTERCEPT              | chembl:CHEMBL2109662 | 31.83 |
| BMP2    | 650   | DTC                     |                                 | BUTAMBENBUTAMBEN                             | BUTAMBEN                  | chembl:CHEMBL127516  | 7.96  |
| BMP2K   | 55589 | DTC                     | inhibitor                       | HESPERADIHESPERADIN                          | HESPERADIN                | chembl:CHEMBL514409  | 0.8   |
| BMP5    | 653   | PharmGKB                |                                 | escitalopram escitalopram                    | ESCITALOPRAM              | chembl:CHEMBL1508    | 7.07  |
| BMP7    | 655   | PharmGKB                |                                 | pegaspargase pegaspargase                    | PEGASPARGASE              | chembl:CHEMBL2108546 | 3.18  |
| BMPR1A  | 657   | GuideToPharmac          | inhibitor                       | 249565824 COMPOUND 13R [PMID: 23639540]      |                           |                      |       |
| BMPR1B  | 658   | GuideToPharmac          | inhibitor                       | 249565824 COMPOUND 13R [PMID: 23639540]      |                           |                      |       |
| BMPR2   | 659   | GuideToPharmac          | inhibitor                       | 249565835 COMPOUND 13A [PMID: 23639540]      |                           |                      |       |
| BMX     | 660   | DTC                     |                                 | PD-168393 PD-168393                          | CHEMBL285063              | chembl:CHEMBL285063  | 15.91 |
| BPI     | 671   | TTD                     |                                 | XOMA-629 XOMA-629                            |                           |                      |       |
| BPTF    | 2186  | GuideToPharmac          | inhibitor                       | 252827533 MS363                              |                           |                      |       |
| BRAF    | 673   | CIViC                   |                                 | TRAMETINITRAMETINIB DIMETHYL SULFOXIDE       |                           |                      |       |
| BRCA1   | 672   | DTC                     |                                 | DOXORUBI(DOXORUBICIN HYDROCHLORIDE)          | DOXORUBICIN HYDROCHLORIDE | chembl:CHEMBL359744  | 0.02  |
| BRCA2   | 675   | OncKB                   |                                 | Talazoparib Talazoparib                      | TALAZOPARIB               | chembl:CHEMBL3137320 | 1.62  |
| BRD1    | 23774 | GuideToPharmac          | inhibitor                       | 252166774 NI-57                              |                           |                      |       |
| BRD2    | 6046  | DTC                     |                                 | TRIAZOLANTRIAZOLAM                           | TRIAZOLAM                 | chembl:CHEMBL646     | 0.47  |
| BRD3    | 8019  | TTD                     |                                 | ABBV-744 ABBV-744                            | ABBV-744                  | chembl:CHEMBL4297454 | 2.65  |
| BRD4    | 23476 | TTD                     |                                 | Aminocyclop Aminocyclopentenone compound 1   |                           |                      |       |
| BRD7    | 29117 | GuideToPharmac          | inhibitor                       | 252166773 LP99                               |                           |                      |       |
| BRD9    | 65980 | GuideToPharmac          | inhibitor                       | 252166773 LP99                               |                           |                      |       |
| BRDT    | 676   | DTC                     |                                 | TRIAZOLANTRIAZOLAM                           | TRIAZOLAM                 | chembl:CHEMBL646     | 1.41  |
| BRPF1   | 7862  | GuideToPharmacology     |                                 | 223366140 COMPOUND 1 [PMID: 25408830]        |                           |                      |       |
| BRPF3   | 27154 | GuideToPharmacology     |                                 | 336446909 OF-1                               |                           |                      |       |
| BRS3    | 680   | GuideToPharmac          | antagonist                      | 178102797 BANTAG-1                           |                           |                      |       |
| BRSK1   | 84446 | DTC                     |                                 | OSI-632 OSI-632                              | OSI-632                   | chembl:CHEMBL253969  | 0.07  |
| BRSK2   | 9024  | GuideToPharmac          | inhibitor                       | 249565895 CCT244747                          | CHEMBL2203843             | chembl:CHEMBL2203843 | 10.61 |
| BSG     | 682   | TTD                     |                                 | [131I]-Metux [131I]-Metuximab injection      |                           |                      |       |
| BST1    | 683   | PharmGKB                |                                 | Beta blockingBeta blocking agents, selective |                           |                      |       |
| BTC     | 685   | PharmGKB                |                                 | panitumumabpanitumumab                       | PANITUMUMAB               | chembl:CHEMBL1201827 | 1.52  |
| BTF3P11 | 690   | NCI                     |                                 | CALCITRIO(CALCITRIOL                         | CALCITRIOL                | chembl:CHEMBL846     | 2.89  |
| BTK     | 695   | TTD                     |                                 | PRN2246 PRN2246                              |                           |                      |       |
| BTN3A1  | 11119 | GuideToPharmacology     |                                 | 340590246 POM2-C-HMBP                        |                           |                      |       |

|          |                         |           |                                                                |                      |                      |       |
|----------|-------------------------|-----------|----------------------------------------------------------------|----------------------|----------------------|-------|
| BUB1     | 699 GuideToPharmac      | inhibitor | 249565789 COMPOUND 2-1-1 [PMID: 24900824]                      |                      |                      |       |
| C10ORF67 | 256815 PharmGKB         |           | mitoxantrone mitoxantrone                                      | MITOXANTRONE         | chembl:CHEMBL58      | 3.1   |
| C11ORF65 | 160140 PharmGKB         |           | metformin metformin                                            | METFORMIN            | chembl:CHEMBL1431    | 3.35  |
| C1QA     | 712 TEND                |           | IMMUNE GIIMMUNE GLOBULIN                                       |                      |                      |       |
| C1R      | 715 GuideToPharmac      | inhibitor | 178101079 NAFAMOSTAT                                           | NAFAMOSTAT           | chembl:CHEMBL273264  | 5.79  |
| C1S      | 716 TTD                 |           | TNT009 TNT009                                                  |                      |                      |       |
| C3       | 718 TTD                 |           | Imprime PGCImprime PGG immunotherapeutic                       |                      |                      |       |
| C3AR1    | 719 GuideToPharmac      | agonist   | 381744906 CASOXIN C                                            |                      |                      |       |
| C5       | 727 PharmGKB            |           | eculizumab eculizumab                                          | ECULIZUMAB           | chembl:CHEMBL1201828 | 45.47 |
| C5AR1    | 728 GuideToPharmac      | agonist   | 178100215 C5A DES-ARG                                          | RAVIDASVIR           | chembl:CHEMBL3121849 | 15.91 |
| C5AR2    | 27202 GuideToPharmac    | agonist   | 135651643 C5A                                                  | RAVIDASVIR           | chembl:CHEMBL3121849 | 31.83 |
| C6ORF15  | 29113 PharmGKB          |           | gemcitabine gemcitabine                                        | GEMCITABINE          | chembl:CHEMBL888     | 0.79  |
| C8ORF34  | 116328 PharmGKB         |           | irinotecan irinotecan                                          | IRINOTECAN           | chembl:CHEMBL481     | 2.4   |
| C9ORF72  | 203228 PharmGKB         |           | Tumor necrosTumor necrosis factor alpha (TNF-alpha) inhibitors |                      |                      |       |
| CA1      | 759 TEND                |           | DICHLORPFDICHLORPHENAMIDE                                      | DICHLORPHENAMIDE     | chembl:CHEMBL17      | 5.89  |
| CA10     | 56934 PharmGKB          |           | fluticasone prfluticasone propionate                           |                      |                      |       |
| CA12     | 771 TTD                 |           | Salicyclic aciSalicyclic acid                                  |                      |                      |       |
| CA13     | 377677 ChemblInteractio | inhibitor | CHEMBL18 ETHOXZOLAMIDE                                         | ETHOXZOLAMIDE        | chembl:CHEMBL18      | 4.9   |
| CA14     | 23632 GuideToPharmac    | inhibitor | 178103403 BRINZOLAMIDE                                         | BRINZOLAMIDE         | chembl:CHEMBL220491  | 1.06  |
| CA2      | 760 TTD                 |           | PARABEN PARABEN                                                | PARABEN              | chembl:CHEMBL441343  | 0.4   |
| CA3      | 761 NCI                 |           | ISOTRETINISOTRETINOIN                                          | ISOTRETINOIN         | chembl:CHEMBL547     | 3.86  |
| CA4      | 762 TTD                 |           | Salicyclic aciSalicyclic acid                                  |                      |                      |       |
| CA5A     | 763 GuideToPharmac      | activator | 178100344 L-HISTIDINE                                          | HISTIDINE            | chembl:CHEMBL17962   | 3.18  |
| CA5B     | 11238 ChemblInteractio  | inhibitor | CHEMBL18 ETHOXZOLAMIDE                                         | ETHOXZOLAMIDE        | chembl:CHEMBL18      | 4.9   |
| CA6      | 765 TTD                 |           | Sulfamylon Sulfamylon                                          | SULFAMYLON           | wikidata:Q47522160   | 2.55  |
| CA7      | 766 GuideToPharmac      | inhibitor | 178103434 METHAZOLAMIDE                                        | METHAZOLAMIDE        | chembl:CHEMBL19      | 1.63  |
| CA9      | 768 GuideToPharmac      | inhibitor | 385612194 COMPOUND 5B [PMID: 31287314]                         |                      |                      |       |
| CACNA1A  | 773 TEND                |           | PREGABALIPREGABALIN                                            | PREGABALIN           | chembl:CHEMBL1059    | 1.85  |
| CACNA1B  | 774 TEND                |           | GABAPENTGABAPENTIN                                             | GABAPENTIN           | chembl:CHEMBL940     | 0.45  |
| CACNA1C  | 775 ChemblInteractio    | blocker   | CHEMBL12(AMLODIPINE BESYLATE                                   | AMLODIPINE BESYLATE  | chembl:CHEMBL1200402 | 0.37  |
| CACNA1D  | 776 GuideToPharmac      | blocker   | 135651305 VERAPAMIL                                            | VERAPAMIL            | chembl:CHEMBL6966    | 0.24  |
| CACNA1E  | 777 ChemblInteractio    | modulator | CHEMBL10:PREGABALIN                                            | PREGABALIN           | chembl:CHEMBL1059    | 0.32  |
| CACNA1F  | 778 ChemblInteractio    | modulator | CHEMBL21(IMAGABALIN                                            | IMAGABALIN           | chembl:CHEMBL2103836 | 0.11  |
| CACNA1G  | 8913 TTD                |           | NGD 94-1 NGD 94-1                                              |                      |                      |       |
| CACNA1H  | 8912 DTC                |           | FLUNARIZIIFLUNARIZINE DIHYDROCFLUNARIZINE DIHYDROCHLOR         | chembl:CHEMBL539027  | 0.45                 |       |
| CACNA1I  | 8911 ChemblInteractio   | blocker   | CHEMBL15:MIBEFRADIL DIHYDROCFMIBEFRADIL DIHYDROCHLORI          | chembl:CHEMBL1534525 | 0.45                 |       |
| CACNA1S  | 779 GuideToPharmac      | activator | 178100888 (-)-(S)-BAYK8644                                     |                      |                      |       |
| CACNA2D1 | 781 PharmGKB            |           | celecoxib celecoxib                                            | CELECOXIB            | chembl:CHEMBL118     | 0.11  |
| CACNA2D2 | 9254 ChemblInteractio   | modulator | CHEMBL21(IMAGABALIN                                            | IMAGABALIN           | chembl:CHEMBL2103836 | 0.25  |
| CACNA2D3 | 55799 ChemblInteractio  | blocker   | CHEMBL12(BEPRIDIL HYDROCHLORIBEPRIDIL HYDROCHLORIDE            | chembl:CHEMBL1200382 | 0.36                 |       |
| CACNA2D4 | 93589 ChemblInteractio  | blocker   | CHEMBL12(BEPRIDIL HYDROCHLORIBEPRIDIL HYDROCHLORIDE            | chembl:CHEMBL1200382 | 0.36                 |       |
| CACNB1   | 782 TdgClinicalTrial    |           | ARVERAPA ARVERAPAMIL                                           |                      |                      |       |

|        |                            |           |                                |                               |                           |                      |       |
|--------|----------------------------|-----------|--------------------------------|-------------------------------|---------------------------|----------------------|-------|
| CACNB2 | 783 TdgClinicalTrial       | ARVERAPA  | ARVERAPAMIL                    |                               |                           |                      |       |
| CACNB3 | 784 ChemblInteractio       | modulator | CHEMBL59:ATAGABALIN            | ATAGABALIN                    | chembl:CHEMBL593430       | 0.28                 |       |
| CACNB4 | 785 TEND                   |           | VERAPAMI                       | VERAPAMIL                     | chembl:CHEMBL6966         | 0.53                 |       |
| CACNG1 | 786 ChemblInteractio       | modulator | CHEMBL59:ATAGABALIN            | ATAGABALIN                    | chembl:CHEMBL593430       | 0.2                  |       |
| CACNG2 | 10369 ChemblInteractio     | modulator | CHEMBL10:PREGABALIN            | PREGABALIN                    | chembl:CHEMBL1059         | 0.36                 |       |
| CACNG3 | 10368 ChemblInteractio     | modulator | CHEMBL16:GABAPENTIN ENACARBII  | GABAPENTIN ENACARBIL          | chembl:CHEMBL1628502      | 0.42                 |       |
| CACNG4 | 27092 ChemblInteractio     | modulator | CHEMBL94(GABAPENTIN            | GABAPENTIN                    | chembl:CHEMBL940          | 0.35                 |       |
| CACNG5 | 27091 ChemblInteractio     | blocker   | CHEMBL12(BEPRIDIL HYDROCHLORID | BEPRIDIL HYDROCHLORIDE        | chembl:CHEMBL1200382      | 0.42                 |       |
| CACNG6 | 59285 ChemblInteractio     | modulator | CHEMBL94(GABAPENTIN            | GABAPENTIN                    | chembl:CHEMBL940          | 0.35                 |       |
| CACNG7 | 59284 ChemblInteractio     | modulator | CHEMBL16:GABAPENTIN ENACARBII  | GABAPENTIN ENACARBIL          | chembl:CHEMBL1628502      | 0.42                 |       |
| CADM2  | 253559 PharmGKB            |           | ethanol                        | ethanol                       | ALCOHOL                   | chembl:CHEMBL545     | 1.48  |
| CALCA  | 796 TTD                    |           | Bimakalim                      | Bimakalim                     | BIMAKALIM                 | chembl:CHEMBL12552   | 3.03  |
| CALCB  | 797 ChemblInteractio       | inhibitor | CHEMBL38:EPTINEZUMAB           | EPTINEZUMAB                   | chembl:CHEMBL3833320      | 31.83                |       |
| CALCR  | 799 GuideToPharmac         | agonist   | 178100626 [125]CT (HUMAN)      |                               |                           |                      |       |
| CALCRL | 10203 TdgClinicalTrial     |           | CGRP                           | CGRP                          | CALCITONIN GENE-RELATED P | wikidata:Q419432     | 6.37  |
| CALM1  | 801 TEND                   |           | FLUNARIZI                      | FLUNARIZINE                   | FLUNARIZINE               | chembl:CHEMBL30008   | 14.14 |
| CALR   | 811 NCI                    |           | RETINOIC                       | RETINOIC ACID                 |                           |                      |       |
| CALU   | 813 PharmGKB               |           | acenocoumar                    | acenocoumarol                 | ACENOCOUMAROL             | chembl:CHEMBL397420  | 31.83 |
| CALY   | 50632 TdgClinicalTrial     |           | TRIFLUOPE                      | TRIFLUOPERAZINE               | TRIFLUOPERAZINE           | chembl:CHEMBL422     | 5.68  |
| CAMK1  | 8536 DTC                   |           | LINIFANIB                      | LINIFANIB                     | LINIFANIB                 | chembl:CHEMBL223360  | 0.3   |
| CAMK1D | 57118 PharmGKB             |           | losartan                       | losartan                      | LOSARTAN                  | chembl:CHEMBL191     | 1.57  |
| CAMK2A | 815 DTC                    |           | TAE-684                        | TAE-684                       | TAE-684                   | chembl:CHEMBL509032  | 0.09  |
| CAMK2B | 816 NCI                    |           | TRIFLUOPE                      | TRIFLUOPERAZINE               | TRIFLUOPERAZINE           | chembl:CHEMBL422     | 0.23  |
| CAMK2D | 817 DTC                    |           | GEFITINIB                      | GEFITINIB                     | GEFITINIB                 | chembl:CHEMBL939     | 0.06  |
| CAMK2G | 818 DTC                    |           | LINIFANIB                      | LINIFANIB                     | LINIFANIB                 | chembl:CHEMBL223360  | 0.05  |
| CAMK4  | 814 NCI                    |           | ESTRADIOLE                     | ESTRADIOL BENZOATE            |                           |                      |       |
| CAMKK1 | 84254 GuideToPharmac       | inhibitor | 178101957                      | STO609                        |                           |                      |       |
| CAMKK2 | 10645 DTC                  |           | PF-562271                      | PF-562271                     | PF-00562271               | chembl:CHEMBL1084546 | 0.15  |
| CAMLG  | 819 TdgClinicalTrial       |           | CYCLOSPOI                      | CYCLOSPORINE A                |                           |                      |       |
| CAMP   | 820 TTD                    |           | Colforsin dar                  | Colforsin daropate hci        |                           |                      |       |
| CANX   | 821 NCI                    |           | MPO                            | MPO                           | MYELOPEROXIDASE           | chembl:CHEMBL2107858 | 127.3 |
| CAPG   | 822 PharmGKB               |           | vincristine                    | vincristine                   | VINCRISTINE               | chembl:CHEMBL90555   | 1.1   |
| CAPN1  | 823 TTD                    |           | Undecylenic                    | Undecylenic acid derivative 1 |                           |                      |       |
| CAPN10 | 11132 PharmGKB             |           | metformin                      | metformin                     | METFORMIN                 | chembl:CHEMBL1431    | 1.68  |
| CAPN2  | 824 TTD                    |           | Carboxamide                    | Carboxamide derivative 10     |                           |                      |       |
| CARD9  | 64170 NCI                  |           | TUMOR NE                       | TUMOR NECROSIS FACTOR         |                           |                      |       |
| CARM1  | 10498 GuideToPharmac       | inhibitor | 336446915                      | MS049                         |                           |                      |       |
| CARTPT | 9607 NCI                   |           | INSULIN                        | INSULIN                       | INSULIN                   | chembl:CHEMBL1201631 | 0.62  |
| CASP1  | 834 DTC                    |           | BERKELEYI                      | BERKELEYDIONE                 | BERKELEYDIONE             | chembl:CHEMBL400514  | 2.65  |
| CASP10 | 843 ChemblInteractio       | inhibitor | CHEMBL19:EMRICASAN             | EMRICASAN                     | chembl:CHEMBL197672       | 5.3                  |       |
| CASP12 | 100506742 ChemblInteractio | inhibitor | CHEMBL19:EMRICASAN             | EMRICASAN                     | chembl:CHEMBL197672       | 5.3                  |       |
| CASP14 | 23581 GuideToPharmac       | inhibitor | 252166874                      | GRASSYSTATIN A                |                           |                      |       |

|          |                                |                   |                             |                        |                      |       |
|----------|--------------------------------|-------------------|-----------------------------|------------------------|----------------------|-------|
| CASP2    | 835 ChemblInteractioinhibitor  | CHEMBL197         | EMRICASAN                   | EMRICASAN              | chembl:CHEMBL197672  | 1.33  |
| CASP3    | 836 PharmGKB                   | celecoxib         | celecoxib                   | CELECOXIB              | chembl:CHEMBL118     | 0.06  |
| CASP4    | 837 ChemblInteractioinhibitor  | CHEMBL197         | EMRICASAN                   | EMRICASAN              | chembl:CHEMBL197672  | 5.3   |
| CASP5    | 838 ChemblInteractioinhibitor  | CHEMBL197         | EMRICASAN                   | EMRICASAN              | chembl:CHEMBL197672  | 5.3   |
| CASP6    | 839 DTC                        | MYRICETIN         | MYRICETIN                   | MYRICETIN              | chembl:CHEMBL164     | 0.06  |
| CASP7    | 840 PharmGKB                   | paclitaxel        | paclitaxel                  | PACLITAXEL             | chembl:CHEMBL428647  | 0.07  |
| CASP8    | 841 GuideToPharmacinhibitor    | 252166828         | COMPOUND 4 [PMID: 12408711] |                        |                      |       |
| CASP9    | 842 ChemblInteractioinhibitor  | CHEMBL21          | (NIVOCASAN                  | NIVOCASAN              | chembl:CHEMBL2105721 | 3.54  |
| CASR     | 846 ChemblInteractioinhibitor  | CHEMBL21          | (TECALCET HYDROCHLORIDE     | TECALCET HYDROCHLORIDE | chembl:CHEMBL2107572 | 3.98  |
| CAST     | 831 NCI                        | STAUROSPORINE     | STAUROSPORINE               | STAUROSPORINE          | chembl:CHEMBL388978  | 0.76  |
| CAT      | 847 TTD                        | EUK-189           | EUK-189                     |                        |                      |       |
| CATSPER1 | 117144 GuideToPharmacblocker   | 178101029         | HC-056456                   |                        |                      |       |
| CATSPER2 | 117155 GuideToPharmacactivator | 135651539         | PGE2                        | DINOPROSTONE           | chembl:CHEMBL548     | 1.22  |
| CATSPER3 | 347732 GuideToPharmacactivator | 178102065         | PGF1A                       |                        |                      |       |
| CATSPER4 | 378807 GuideToPharmacactivator | 178102065         | PGF1A                       |                        |                      |       |
| CAV1     | 857 NCI                        | ETHANOL           | ETHANOL                     | ALCOHOL                | chembl:CHEMBL545     | 0.74  |
| CBFB     | 865 DTC                        | CYTARABINE        | CYTARABINE                  | HYDROCHLORIDE          | chembl:CHEMBL1256472 | 0.66  |
| CBL      | 867 JAX-CKB                    | Fasudil           | Fasudil                     | FASUDIL                | chembl:CHEMBL38380   | 0.71  |
| CBLB     | 868 JAX-CKB                    | Fasudil           | Fasudil                     | FASUDIL                | chembl:CHEMBL38380   | 2.12  |
| CBLC     | 23624 JAX-CKB                  | Olaparib          | Olaparib                    | OLAPARIB               | chembl:CHEMBL521686  | 4.71  |
| CBR1     | 873 GuideToPharmacinhibitor    | 178102193         | WEDELLOLACTONE              | WEDELLOLACTONE         | chembl:CHEMBL97453   | 0.96  |
| CBR3     | 874 PharmGKB                   | daunorubicin      | daunorubicin                | DAUNORUBICIN           | chembl:CHEMBL178     | 0.4   |
| CBS      | 875 PharmGKB                   | l-methionine      | l-methionine                | METHIONINE             | chembl:CHEMBL42336   | 25.46 |
| CBX1     | 10951 DTC                      | BENSERAZIDE       | BENSERAZIDE                 | BENSERAZIDE            | chembl:CHEMBL1096979 | 0.07  |
| CCHCR1   | 54535 PharmGKB                 | nevirapine        | nevirapine                  | NEVIRAPINE             | chembl:CHEMBL57      | 5.53  |
| CCK      | 885 NCI                        | DIAZOXIDE         | DIAZOXIDE                   | DIAZOXIDE              | chembl:CHEMBL181     | 4.9   |
| CCKAR    | 886 TTD                        | proglumide        | proglumide                  | PROGLUMIDE             | chembl:CHEMBL316561  | 7.96  |
| CCKBR    | 887 PharmGKB                   | olanzapine        | olanzapine                  | OLANZAPINE             | chembl:CHEMBL715     | 0.09  |
| CCL1     | 6346 NCI                       | ANTISENSE         | ANTISENSE                   | OLIGONUCLEOTIDES       |                      |       |
| CCL11    | 6356 NCI                       | TNF-ALPHA         | TNF-ALPHA                   |                        |                      |       |
| CCL14    | 6358 NCI                       | RANTES            | RANTES                      |                        |                      |       |
| CCL17    | 6361 NCI                       | FEXOFENADINE      | FEXOFENADINE                | HYDROCHLORIDE          |                      |       |
| CCL18    | 6362 NCI                       | IMMUNOMODULATORS  | IMMUNOMODULATORS            |                        |                      |       |
| CCL2     | 6347 TTD                       | NOX-E36           | NOX-E36                     |                        |                      |       |
| CCL20    | 6364 TTD                       | GSK3050002        | GSK3050002                  | GSK-3050002            | chembl:CHEMBL4297967 | 63.65 |
| CCL21    | 6366 NCI                       | ADENOVIRAL VECTOR | ADENOVIRAL VECTOR           |                        |                      |       |
| CCL22    | 6367 NCI                       | RANTES            | RANTES                      |                        |                      |       |
| CCL25    | 6370 NCI                       | TNF-ALPHA         | TNF-ALPHA                   |                        |                      |       |
| CCL28    | 56477 NCI                      | ANTISERUM         | ANTISERUM                   |                        |                      |       |
| CCL3     | 6348 NCI                       | INFLIXIMAB        | INFLIXIMAB                  | INFLIXIMAB             | chembl:CHEMBL1201581 | 3.18  |
| CCL4     | 6351 NCI                       | EPO               | EPO                         | EPOETIN ALFA           | chembl:CHEMBL1201565 | 3.35  |
| CCL5     | 6352 TTD                       | NI-0701           | NI-0701                     |                        |                      |       |

|       |                                |                                      |                         |                       |                      |        |
|-------|--------------------------------|--------------------------------------|-------------------------|-----------------------|----------------------|--------|
| CCL7  | 6354 NCI                       | RU 486                               | RU 486                  |                       |                      |        |
| CCL8  | 6355 NCI                       | IL-1                                 | IL-1                    |                       |                      |        |
| CCN1  | 3491 NCI                       | ANTISENSE ANTISENSE OLIGONUCLEOTIDES |                         |                       |                      |        |
| CCN2  | 1490 NCI                       | THROMBIN                             | THROMBIN                | THROMBIN              | chembl:CHEMBL2108110 | 0.28   |
| CCNA2 | 890 NCI                        | ETHINYL ETHINYL ESTRADIOL            |                         |                       |                      |        |
| CCNB1 | 891 DTC                        | PROTOAPIGENONE                       | PROTOAPIGENONE          | PROTOAPIGENONE        | chembl:CHEMBL414890  | 1.52   |
| CCND1 | 595 NCI                        | NIFEDIPINE                           | NIFEDIPINE              | NIFEDIPINE            | chembl:CHEMBL193     | 0.12   |
| CCND2 | 894 ClarityFoundationBiomarker | BAY1000394                           | BAY1000394              |                       |                      |        |
| CCND3 | 896 CIViC                      | PALBOCICLIB                          | PALBOCICLIB             | PALBOCICLIB           | chembl:CHEMBL189963  | 0.92   |
| CCNE1 | 898 ClarityFoundationBiomarker | DINACICLIB                           | DINACICLIB              | DINACICLIB            | chembl:CHEMBL2103840 | 4.24   |
| CCNG1 | 900 TdgClinicalTrial           | MX-DNG1                              | MX-DNG1                 |                       |                      |        |
| CCNK  | 8812 PharmGKB                  | fluorouracil                         | fluorouracil            | FLUOROURACIL          | chembl:CHEMBL185     | 0.2    |
| CCR1  | 1230 DTC                       | 4'-CHLORO-4'-CHLORO-[2,2',6',2']TERP |                         |                       | chembl:CHEMBL2205805 | 25.46  |
| CCR10 | 2826 GuideToPharmacology       | 348353673                            | BI-6901                 |                       |                      |        |
| CCR2  | 729230 GuideToPharmacology     | 178100489                            | GSK COMPOUND 34         |                       |                      |        |
| CCR3  | 1232 GuideToPharmacology       | 135651654                            | CCL11                   |                       |                      |        |
| CCR4  | 1233 GuideToPharmacology       | 178100548                            | [125I]CCL17 (HUMAN)     |                       |                      |        |
| CCR5  | 1234 ChEMBLInteraction         | antagonist                           | CHEMBL12(MARAVIROC)     | MARAVIROC             | chembl:CHEMBL1201187 | 27.58  |
| CCR6  | 1235 NCI                       | TRAIL                                | TRAIL                   |                       |                      |        |
| CCR7  | 1236 GuideToPharmacology       | 135651670                            | CCL21                   |                       |                      |        |
| CCR8  | 1237 GuideToPharmacology       | 135651695                            | CCL8                    |                       |                      |        |
| CCR9  | 10803 TTD                      | MLN-3126                             | MLN-3126                | MLN3126               | chembl:CHEMBL3545268 | 63.65  |
| CCRL2 | 9034 GuideToPharmacology       | 135651663                            | CCL19                   |                       |                      |        |
| CD14  | 929 TdgClinicalTrial           | IC14                                 | IC14                    | IC14                  | chembl:CHEMBL2109330 | 95.48  |
| CD163 | 9332 NCI                       | GLUCOCORGLUCOCORTICOID               |                         |                       |                      |        |
| CD19  | 930 TTD                        | CD19.CAR-aCD19.CAR-aNKT cells        |                         |                       |                      |        |
| CD1A  | 909 TEND                       | ANTITHYMANTITHYMOCYTE GLOBULIN       |                         |                       |                      |        |
| CD1D  | 912 DTC                        | KRN-7000                             | KRN-7000                | RGI-7000              | chembl:CHEMBL384200  | 190.95 |
| CD2   | 914 GuideToPharmacology        | 178103393                            | ALEFACEPT               | ALEFACEPT             | chembl:CHEMBL1201571 | 106.09 |
| CD200 | 4345 ChEMBLInteraction         | inhibitor                            | CHEMBL17(SAMALIZUMAB)   | SAMALIZUMAB           | chembl:CHEMBL1743067 | 190.95 |
| CD22  | 933 GuideToPharmacology        | 223366010                            | MOXETUMOMAB PASUDOTOX   |                       |                      |        |
| CD244 | 51744 NCI                      | IL-2                                 | IL-2                    | ALDESLEUKIN           | wikidata:Q20801763   | 4.9    |
| CD247 | 919 NCI                        | 5-AZACYTIDINE                        | 5-AZACYTIDINE           | AZACITIDINE           | chembl:CHEMBL1489    | 1.25   |
| CD248 | 57124 TTD                      | Oncetuzumab Oncetuzumab Amatumiximab |                         |                       |                      |        |
| CD27  | 939 GuideToPharmacology        | 178101772                            | CD70                    |                       |                      |        |
| CD274 | 29126 FDA                      | Nivolumab                            | Nivolumab               | NIVOLUMAB             | chembl:CHEMBL2108738 | 2.12   |
| CD276 | 80381 GuideToPharmacology      | antibody                             | 340590220 ENOBLITUZUMAB | ENOBLITUZUMAB         | chembl:CHEMBL3545373 | 190.95 |
| CD28  | 940 NCI                        | MPA                                  | MPA                     | PROGESTERONE          | chembl:CHEMBL103     | 0.29   |
| CD33  | 945 GuideToPharmacology        | antibody                             | 329968375 VADASTUXIMAB  | TALIRINE              |                      |        |
| CD34  | 947 NCI                        | DIFFERENT DIFFERENTIATING AGENTS     |                         |                       |                      |        |
| CD36  | 948 GuideToPharmacology        | antagonist                           | 404859035 PEPTIDE 5A    |                       |                      |        |
| CD37  | 951 TTD                        | IMGN529                              | IMGN529                 | NARATUXIMAB EMTANSINE | chembl:CHEMBL2109268 | 31.83  |

|          |                        |                     |                                      |                  |                      |        |
|----------|------------------------|---------------------|--------------------------------------|------------------|----------------------|--------|
| CD38     | 952 TTD                | CART-38 cel         | CART-38 cells                        |                  |                      |        |
| CD3D     | 915 TdgClinicalTrial   | NI-0401             | NI-0401                              | FORALUMAB        | chembl:CHEMBL1743020 | 6.06   |
| CD3E     | 916 ChemblInteractions | CHEMBL174           | BLINATUMOMAB                         | BLINATUMOMAB     | chembl:CHEMBL1742992 | 2.73   |
| CD3G     | 917 TdgClinicalTrial   | OTELIXIZU           | OTELIXIZUMAB                         | OTELIXIZUMAB     | chembl:CHEMBL1743053 | 1.63   |
| CD4      | 920 TTD                | Protein vacci       | Protein vaccines                     |                  |                      |        |
| CD40     | 958 TdgClinicalTrial   | LUCATUMU            | LUCATUMUMAB                          | LUCATUMUMAB      | chembl:CHEMBL1743038 | 2.89   |
| CD40LG   | 959 TTD                | BI 655064           | BI 655064                            |                  |                      |        |
| CD44     | 960 NCI                | GENTAMICI           | GENTAMICIN                           | GENTAMICIN       | chembl:CHEMBL3039597 | 2.02   |
| CD47     | 961 TdgClinicalTrial   | ABT-510             | ABT-510                              | ABT-510          | chembl:CHEMBL386115  | 5.3    |
| CD5      | 921 NCI                | HMBA                | HMBA                                 |                  |                      |        |
| CD52     | 1043 GuideToPharmac    | antibody 178103376  | ALEMTUZUMAB                          | ALEMTUZUMAB      | chembl:CHEMBL1201587 | 509.21 |
| CD55     | 1604 NCI               | PD-98059            | PD-98059                             | CHEMBL35482      | chembl:CHEMBL35482   | 1.72   |
| CD58     | 965 NCI                | ALBUMIN             | ALBUMIN                              | ALBUMIN HUMAN    | chembl:CHEMBL1201451 | 4.24   |
| CD59     | 966 NCI                | MBL                 | MBL                                  |                  |                      |        |
| CD6      | 923 ChemblInteractions | CHEMBL21            | (ONCOLYSIN CD6                       | ONCOLYSIN CD6    | chembl:CHEMBL2109485 | 31.83  |
| CD63     | 967 NCI                | NONSTERO            | NONSTEROIDAL ANTI-INFLAMMATORY DRUGS |                  |                      |        |
| CD69     | 969 NCI                | ANTITUMOR           | ANTIBIOTICS                          |                  |                      |        |
| CD7      | 924 TTD                | CD7.CAR/28          | CD7.CAR/28zeta CAR T cells           |                  |                      |        |
| CD70     | 970 TTD                | AMG 172             | AMG 172                              |                  |                      |        |
| CD74     | 972 TdgClinicalTrial   | MILATUZU            | MILATUZUMAB                          | MILATUZUMAB      | chembl:CHEMBL1743040 | 318.26 |
| CD79B    | 974 TTD                | Polatuzumab         | Polatuzumab vedotin                  |                  |                      |        |
| CD80     | 941 NCI                | CTLA4-IG            | CTLA4-IG                             | ABATACEPT        | chembl:CHEMBL1201823 | 42.43  |
| CD82     | 3732 NCI               | NERVE GRC           | NERVE GROWTH FACTOR                  |                  |                      |        |
| CD83     | 9308 NCI               | SULFASAL            | SULFASALAZINE                        | SULFASALAZINE    | chembl:CHEMBL421     | 5.3    |
| CD84     | 8832 PharmGKB          | etanercept          | etanercept                           | ETANERCEPT       | chembl:CHEMBL1201572 | 6.7    |
| CD86     | 942 NCI                | PAMIDRON            | PAMIDRONATE                          | PAMIDRONIC ACID  | chembl:CHEMBL834     | 3.64   |
| CD8A     | 925 TTD                | Protein vacci       | Protein vaccines                     |                  |                      |        |
| CD9      | 928 NCI                | PROPIONIB           | PROPIONIBACTERIUM ACNES              |                  |                      |        |
| CDA      | 978 NCI                | CYTARABI            | CYTARABINE                           | CYTARABINE       | chembl:CHEMBL803     | 2.96   |
| CDC25A   | 993 DTC                | 3-(3-STIBON         | 3-(3-STIBONOPHENYL)PR                | CHEMBL2057662    | chembl:CHEMBL2057662 | 63.65  |
| CDC25B   | 994 TTD                | Avastin+/-          | Ta:Avastin+/-Tarceva                 |                  |                      |        |
| CDC25C   | 995 NCI                | CDDP                | CDDP                                 | CISPLATIN        | chembl:CHEMBL11359   | 0.22   |
| CDC37    | 11140 DTC              | SODIUM M            | (SODIUM MOLYBDATE                    | SODIUM MOLYBDATE | chembl:CHEMBL1801596 | 63.65  |
| CDC42    | 998 DTC                | SECRAMIN            | SECRAMINE B                          | SECRAMINE B      | chembl:CHEMBL1222039 | 21.22  |
| CDC42BPA | 8476 DTC               | TAE-684             | TAE-684                              | TAE-684          | chembl:CHEMBL509032  | 0.07   |
| CDC42BPB | 9578 GuideToPharmac    | inhibitor 249565884 | A-443654                             | A-443654         | chembl:CHEMBL379300  | 4.9    |
| CDC5L    | 988 PharmGKB           | gemcitabine         | gemcitabine                          | GEMCITABINE      | chembl:CHEMBL888     | 1.57   |
| CDC7     | 8317 ChemblInteractio  | inhibitor CHEMBL354 | NMS-1116354                          | NMS-1116354      | chembl:CHEMBL3545321 | 9.79   |
| CDH1     | 999 JAX-CKB            | Volasertib          | Volasertib                           | VOLASERTIB       | chembl:CHEMBL1233528 | 8.49   |
| CDH11    | 1009 TTD               | RG6125              | RG6125                               |                  |                      |        |
| CDH17    | 1015 NCI               | TCDD                | TCDD                                 |                  |                      |        |
| CDH2     | 1000 TdgClinicalTrial  | ADH-1               | ADH-1                                | ADH-1            | chembl:CHEMBL3818130 | 31.83  |

|            |                                 |                                                        |                 |                      |       |
|------------|---------------------------------|--------------------------------------------------------|-----------------|----------------------|-------|
| CDH23      | 64072 PharmGKB                  | methylphenidmethylphenidate                            | METHYLPHENIDATE | chembl:CHEMBL796     | 2.83  |
| CDH3       | 1001 TTD                        | PF-3732010 PF-3732010                                  |                 |                      |       |
| CDH5       | 1003 TdgClinicalTrial           | FX06 FX06                                              |                 |                      |       |
| CDK1       | 983 TTD                         | RGB-286638 RGB-286638                                  | RGB-286638      | chembl:CHEMBL3545083 | 0.27  |
| CDK10      | 8558 ChEMBLInteractioinhibitor  | CHEMBL48{AZD-5438                                      | AZD-5438        | chembl:CHEMBL488436  | 0.64  |
| CDK11B     | 984 ChEMBLInteractioinhibitor   | CHEMBL35{Roniciclib                                    | RONICICLIB      | chembl:CHEMBL3544942 | 0.8   |
| CDK12      | 51755 GuideToPharmacinhibitor   | 375973251 CDK12 INHIBITOR 2                            |                 |                      |       |
| CDK13      | 8621 GuideToPharmacinhibitor    | 375973251 CDK12 INHIBITOR 2                            |                 |                      |       |
| CDK14      | 5218 ChEMBLInteractioinhibitor  | CHEMBL44{AT-7519                                       | AT-7519         | chembl:CHEMBL445813  | 0.76  |
| CDK15      | 65061 ChEMBLInteractioinhibitor | CHEMBL35{Roniciclib                                    | RONICICLIB      | chembl:CHEMBL3544942 | 0.8   |
| CDK16      | 5127 DTC inhibitor              | HESPERADIHESPERADIN                                    | HESPERADIN      | chembl:CHEMBL514409  | 0.32  |
| CDK17      | 5128 ChEMBLInteractioinhibitor  | CHEMBL12{PHA-793887                                    | PHA-793887      | chembl:CHEMBL1230607 | 0.76  |
| CDK18      | 5129 GuideToPharmacinhibitor    | 249565897 COMPOUND 77 [PMID: 24793884]                 |                 |                      |       |
| CDK19      | 23097 GuideToPharmacinhibitor   | 252827368 PEXIDARTINIB                                 | PEXIDARTINIB    | chembl:CHEMBL3813873 | 0.53  |
| CDK2       | 1017 TTD                        | INOC-005 INOC-005                                      |                 |                      |       |
| CDK20      | 23552 ChEMBLInteractioinhibitor | CHEMBL35{Roniciclib                                    | RONICICLIB      | chembl:CHEMBL3544942 | 0.8   |
| CDK3       | 1018 TTD                        | PMID261616PMID26161698-Compound-17                     |                 |                      |       |
| CDK4       | 1019 TTD                        | PD-332991 PD-332991                                    |                 |                      |       |
| CDK5       | 1020 DTC                        | TAE-684 TAE-684                                        | TAE-684         | chembl:CHEMBL509032  | 0.01  |
| CDK5R1     | 8851 DTC                        | DNDII41716DNDII417165                                  | CHEMBL1406948   | chembl:CHEMBL1406948 | 1.82  |
| CDK6       | 1021 GuideToPharmacinhibitor    | 178102290 AT-7519                                      | AT-7519         | chembl:CHEMBL445813  | 0.34  |
| CDK7       | 1022 CancerCommonsinhibitor     | SNS-032 SNS-032                                        | BMS-387032      | chembl:CHEMBL296468  | 0.82  |
| CDK8       | 1024 DTC                        | ILORASERTILORASERTIB                                   | ILORASERTIB     | chembl:CHEMBL1980297 | 0.03  |
| CDK9       | 1025 ChEMBLInteractioinhibitor  | CHEMBL14{SELICICLIB                                    | SELICICLIB      | chembl:CHEMBL14762   | 1.02  |
| CDKAL1     | 54901 PharmGKB                  | Dipeptidyl peDipeptidyl peptidase 4 (DPP-4) inhibitors |                 |                      |       |
| CDKL1      | 8814 GuideToPharmacinhibitor    | 249565840 COMPOUND 9B [PMID: 18986805]                 |                 |                      |       |
| CDKL2      | 8999 GuideToPharmacinhibitor    | 249565786 URMIC-099                                    |                 |                      |       |
| CDKN1A     | 1026 NCI                        | ANTIMETAIAANTIMETABOLITE                               |                 |                      |       |
| CDKN1B     | 1027 NCI                        | TCDD TCDD                                              |                 |                      |       |
| CDKN1C     | 1028 NCI                        | HISTONE DIHISTONE DEACETYLASE INHIBITOR                |                 |                      |       |
| CDKN2A     | 1029 JAX-CKB                    | ON-01910 ON-01910                                      | RIGOSERTIB      | chembl:CHEMBL1241855 | 0.67  |
| CDKN2B     | 1030 CIViC                      | PALBOCICLPALBOCICLIB                                   | PALBOCICLIB     | chembl:CHEMBL189963  | 2.77  |
| CDKN2B-AS1 | 100048912 PharmGKB              | AntiinflammæAntiinflammatory agents, non-steroids      |                 |                      |       |
| CDKN2C     | 1031 NCI                        | ANTISENSEANTISENSE OLIGONUCLEOTIDES                    |                 |                      |       |
| CDKN2D     | 1032 NCI                        | 5-AZA-2&A15-AZA-2&APOS;-DEOXYCYTIDINE                  |                 |                      |       |
| CDKN3      | 1033 ChEMBLInteractioinhibitor  | CHEMBL35{Roniciclib                                    | RONICICLIB      | chembl:CHEMBL3544942 | 0.8   |
| CDS1       | 1040 ChEMBLInteractioinhibitor  | CHEMBL35{PREXASERTIB                                   | PREXASERTIB     | chembl:CHEMBL3544911 | 6.37  |
| CDSN       | 1041 PharmGKB                   | carboplatin carboplatin                                | CARBOPLATIN     | chembl:CHEMBL1351    | 0.81  |
| CDX2       | 1045 NCI                        | TPN TPN                                                |                 |                      |       |
| CEACAM1    | 634 NCI                         | CHEMOKIN CHEMOKINES                                    |                 |                      |       |
| CEACAM3    | 1084 TTD                        | Arcitumoma{Arcitumomab                                 | ARCITUMOMAB     | chembl:CHEMBL2108253 | 31.83 |
| CEACAM5    | 1048 NCI                        | GENISTEIN GENISTEIN                                    | GENISTEIN       | chembl:CHEMBL44      | 0.47  |

|         |                      |                       |               |                                                    |                          |                      |       |
|---------|----------------------|-----------------------|---------------|----------------------------------------------------|--------------------------|----------------------|-------|
| CEACAM6 | 4680 NCI             |                       | ANTISERUM     | ANTISERUM                                          |                          |                      |       |
| CEACAM7 | 1087 NCI             |                       | IFN           | IFN                                                |                          |                      |       |
| CEBPA   | 1050 CIViC           |                       | OICR-9429     | OICR-9429                                          |                          |                      |       |
| CECR2   | 27443 GuideToPharmac | inhibitor             | 252827481     | COMPOUND 50 [PMID: 24313754]                       |                          |                      |       |
| CEL     | 1056 TTD             |                       | Bucelipase al | Bucelipase alfa                                    |                          |                      |       |
| CELA1   | 1990 TTD             |                       | Alpha 1-PI    | Alpha 1-PI                                         |                          |                      |       |
| CELF4   | 56853 PharmGKB       |                       | iloperidone   | iloperidone                                        | ILOPERIDONE              | chembl:CHEMBL14376   | 8.49  |
| CELSR2  | 1952 PharmGKB        |                       | hmg coa redu  | hmg coa reductase inhibitors                       |                          |                      |       |
| CENPE   | 1062 TALC            | inhibitor             | GSK-923295    | GSK-923295                                         |                          |                      |       |
| CEP43   | 11116 PharmGKB       |                       | brivanib      | brivanib                                           | BRIVANIB                 | chembl:CHEMBL377300  | 11.57 |
| CEP68   | 23177 PharmGKB       |                       | aspirin       | aspirin                                            | ASPIRIN                  | chembl:CHEMBL25      | 0.87  |
| CEP72   | 55722 PharmGKB       |                       | vincristine   | vincristine                                        | VINCRISTINE              | chembl:CHEMBL90555   | 2.19  |
| CERK    | 64781 GuideToPharmac | inhibitor             | 178103280     | NVP 231                                            |                          |                      |       |
| CERKL   | 375298 PharmGKB      |                       | iloperidone   | iloperidone                                        | ILOPERIDONE              | chembl:CHEMBL14376   | 8.49  |
| CERS6   | 253782 PharmGKB      |                       | Tumor necros  | Tumor necrosis factor alpha (TNF-alpha) inhibitors |                          |                      |       |
| CES1    | 1066 PharmGKB        |                       | clopidogrel   | clopidogrel                                        | CLOPIDOGREL              | chembl:CHEMBL1771    | 1.45  |
| CES1P1  | 51716 PharmGKB       |                       | clopidogrel   | clopidogrel                                        | CLOPIDOGREL              | chembl:CHEMBL1771    | 3.18  |
| CES2    | 8824 PharmGKB        |                       | SN-38         | SN-38                                              | 7-ETHYL-10-HYDROXYCAMPTC | chembl:CHEMBL837     | 1.18  |
| CETP    | 1071 TTD             |                       | DRL-17822     | DRL-17822                                          |                          |                      |       |
| CFAP44  | 55779 PharmGKB       |                       | hmg coa redu  | hmg coa reductase inhibitors                       |                          |                      |       |
| CFB     | 629 GuideToPharmac   | inhibitor             | 252166853     | COMPOUND 51 [PMID: 19743866]                       |                          |                      |       |
| CFD     | 1675 GuideToPharmac  | antibody              | 252166506     | LAMPALIZUMAB                                       | LAMPALIZUMAB             | chembl:CHEMBL2109408 | 63.65 |
| CFH     | 3075 PharmGKB        |                       | photodynami   | photodynamic therapy                               |                          |                      |       |
| CFHR4   | 10877 PharmGKB       |                       | phenytoin     | phenytoin                                          | PHENYTOIN                | chembl:CHEMBL16      | 1.63  |
| CFI     | 3426 NCI             |                       | TGFBETA1      | TGFBETA1                                           |                          |                      |       |
| CFL1    | 1072 DTC             |                       | SERTRALIN     | SERTRALINE                                         | SERTRALINE               | chembl:CHEMBL809     | 0.76  |
| CFLAR   | 8837 DTC             |                       | BAY-11-708    | BAY-11-7085                                        | BAY-11-7085              | chembl:CHEMBL270299  | 1.52  |
| CFTR    | 1080 PharmGKB        |                       | ivacaftor /   | tezivacaftor / tezacaftor                          |                          |                      |       |
| CGA     | 1081 NCI             |                       | VINBLASTI     | VINBLASTINE                                        | VINBLASTINE              | chembl:CHEMBL159     | 1.41  |
| CGB5    | 93659 NCI            |                       | NORETHIN      | NORETHINDRONE                                      | NORETHINDRONE            | chembl:CHEMBL1162    | 4.71  |
| CH25H   | 9023 Chemb           | Interaction inhibitor | CHEMBL281     | TABIMORELIN                                        | TABIMORELIN              | chembl:CHEMBL281764  | 10.61 |
| CHAT    | 1103 NCI             |                       | PILOCARP      | PILOCARPINE                                        | PILOCARPINE              | chembl:CHEMBL550     | 0.91  |
| CHD1    | 1105 Tdg             | Clinical Trial        | EPIRUBIC      | EPIRUBICIN                                         | EPIRUBICIN               | chembl:CHEMBL417     | 8.49  |
| CHD4    | 1108 PharmGKB        |                       | vorinostat    | vorinostat                                         | VORINOSTAT               | chembl:CHEMBL98      | 2.77  |
| CHEK1   | 1111 GuideToPharmac  | inhibitor             | 223366046     | AZD7762                                            | AZD-7762                 | chembl:CHEMBL2041933 | 1.77  |
| CHEK2   | 11200 GuideToPharmac | inhibitor             | 336446935     | PREXASERTIB                                        | PREXASERTIB              | chembl:CHEMBL3544911 | 0.49  |
| CHIL3L1 | 1116 NCI             |                       | ANTI-INFLA    | ANTI-INFLAMMATORY DRUGS                            |                          |                      |       |
| CHIA    | 27159 PharmGKB       |                       | aspirin       | aspirin                                            | ASPIRIN                  | chembl:CHEMBL25      | 0.87  |
| CHKA    | 1119 TTD             |                       | TCD-717       | TCD-717                                            | TCD-717                  | chembl:CHEMBL3545084 | 63.65 |
| CHN2    | 1124 PharmGKB        |                       | fluorouracil  | fluorouracil                                       | FLUOROURACIL             | chembl:CHEMBL185     | 1.21  |
| CHPT1   | 56994 PharmGKB       |                       | lamivudine    | lamivudine                                         | LAMIVUDINE               | chembl:CHEMBL141     | 2.45  |
| CHRM1   | 1128 TEND            |                       | BENZQUIN      | BENZQUINAMIDE                                      | BENZQUINAMIDE            | chembl:CHEMBL1201250 | 0.25  |

|         |                                   |                                  |                        |                      |        |
|---------|-----------------------------------|----------------------------------|------------------------|----------------------|--------|
| CHRM2   | 1129 TdgClinicalTrial             | DOXACURIDOXACURIUM               | DOXACURIUM             | chembl:CHEMBL1237123 | 1.92   |
| CHRM3   | 1131 GuideToPharmacagonist        | 135652666 ARECOLINE              | ARECOLINE              | chembl:CHEMBL7303    | 0.32   |
| CHRM4   | 1132 GuideToPharmac antagonist    | 178103926 UMECLIDINIUM           | UMECLIDINIUM           | chembl:CHEMBL1187833 | 0.36   |
| CHRM5   | 1133 GuideToPharmacagonist        | 135650728 NNC 11-1607            |                        |                      |        |
| CHRNA1  | 1134 ChemblInteractio antagonist  | CHEMBL12(CISATRACURIUM BESYLATE) | CISATRACURIUM BESYLATE | chembl:CHEMBL1200641 | 0.53   |
| CHRNA10 | 57053 GuideToPharmac antagonist   | 135652718 STRYCHNINE             | STRYCHNINE             | chembl:CHEMBL227934  | 1.06   |
| CHRNA2  | 1135 TdgClinicalTrial             | GANTACURGANTACURIUM              | GANTACURIUM            | chembl:CHEMBL1182997 | 3.18   |
| CHRNA3  | 1136 ChemblInteractio antagonist  | CHEMBL35(TC-6499)                | TC-6499                | chembl:CHEMBL3545353 | 0.8    |
| CHRNA4  | 1137 TTD                          | RPI-MN RPI-MN                    |                        |                      |        |
| CHRNA5  | 1138 ChemblInteractio partial agc | CHEMBL12(POZANICLINE)            | POZANICLINE            | chembl:CHEMBL127071  | 3.98   |
| CHRNA6  | 8973 GuideToPharmac antagonist    | 178100811 A-CONOTOXIN PIA        |                        |                      |        |
| CHRNA7  | 1139 GuideToPharmac antagonist    | 336446923 ATRACURIUM             | ATRACURIUM             | chembl:CHEMBL1360    | 0.29   |
| CHRNA9  | 55584 GuideToPharmac antagonist   | 329968412 RGIA4                  |                        |                      |        |
| CHRNB1  | 1140 ChemblInteractio antagonist  | CHEMBL12(GALLAMINE TRIETHIODIDE) | GALLAMINE TRIETHIODIDE | chembl:CHEMBL1200993 | 0.65   |
| CHRNB2  | 1141 ChemblInteractio antagonist  | CHEMBL3 NICOTINE                 | NICOTINE               | chembl:CHEMBL3       | 1.06   |
| CHRNB4  | 1143 PharmGKB                     | cotinine cotinine                | COTININE               | chembl:CHEMBL578211  | 0.49   |
| CHRND   | 1144 ChemblInteractio antagonist  | CHEMBL16(TUBOCURARINE CHLORIDE)  | TUBOCURARINE CHLORIDE  | chembl:CHEMBL1687    | 0.91   |
| CHRNE   | 1145 ChemblInteractio antagonist  | CHEMBL12(PIPECURONIUM BROMIDE)   | PIPECURONIUM BROMIDE   | chembl:CHEMBL1200722 | 0.91   |
| CHRNG   | 1146 ChemblInteractio antagonist  | CHEMBL12(ROCURONIUM BROMIDE)     | ROCURONIUM BROMIDE     | chembl:CHEMBL1200648 | 0.76   |
| CHST1   | 8534 PharmGKB                     | imatinib imatinib                | IMATINIB               | chembl:CHEMBL941     | 1.99   |
| CHST11  | 50515 NCI                         | CHONDROITIN SULFATE              |                        |                      |        |
| CHST3   | 9469 PharmGKB                     | thalidomide thalidomide          | THALIDOMIDE            | chembl:CHEMBL468     | 1.82   |
| CHUK    | 1147 DTC                          | N-(3-OXODODECANOYL)              | CHEMBL8483             | chembl:CHEMBL8483    | 2.12   |
| CHURC1  | 91612 PharmGKB                    | methylphenidate                  | METHYLPHENIDATE        | chembl:CHEMBL796     | 2.83   |
| CIC     | 23152 CIViC                       | TRAMETINIB                       | TRAMETINIB             | chembl:CHEMBL2103875 | 1.01   |
| CIP2A   | 57650 CIViC                       | GEMCITABINE                      | GEMCITABINE            | chembl:CHEMBL888     | 1.57   |
| CISH    | 1154 NCI                          | EPO EPO                          | EPOETIN ALFA           | chembl:CHEMBL1201565 | 6.7    |
| CKM     | 1158 NCI                          | SALT SALT                        | VOLANESORSEN SODIUM    | chembl:CHEMBL3544989 | 5.3    |
| CLC     | 1178 TTD                          | TM-601 TM-601                    | CHLOROTOXIN            | chembl:CHEMBL4298122 | 21.22  |
| CLCA1   | 1179 TdgClinicalTrial             | TALNIFLUMATE                     | TALNIFLUMATE           | chembl:CHEMBL1081506 | 63.65  |
| CLCC1   | 23155 PharmGKB                    | opioids opioids                  |                        |                      |        |
| CLCN1   | 1180 GuideToPharmac blocker       | 178100935 9-ANTHROIC ACID        |                        |                      |        |
| CLCN2   | 1181 ChemblInteractions           | CHEMBL12(LUBIPROSTONE)           | LUBIPROSTONE           | chembl:CHEMBL1201134 | 148.52 |
| CLCN3   | 1182 GuideToPharmac blocker       | 178101102 PHLORETIN              | PHLORETIN              | chembl:CHEMBL45068   | 0.84   |
| CLCN4   | 1183 GuideToPharmac blocker       | 135652747 ZN2+                   |                        |                      |        |
| CLCN6   | 1185 GuideToPharmac blocker       | 178100996 DIDS                   |                        |                      |        |
| CLCN7   | 1186 GuideToPharmac blocker       | 178100996 DIDS                   |                        |                      |        |
| CLCNKA  | 1187 TEND                         | NIFLUMIC ACID                    |                        |                      |        |
| CLCNKB  | 1188 GuideToPharmac activator     | 135650716 NIFLUMIC ACID          |                        |                      |        |
| CLDN18  | 51208 GuideToPharmac antibody     | 315661285 IMAB362                | ZOLBETUXIMAB           | chembl:CHEMBL2109427 | 190.95 |
| CLEC12A | 160364 GuideToPharmac antibody    | 384403634 TEPODITAMAB            |                        |                      |        |
| CLEC4C  | 170482 ChemblInteractio inhibitor | CHEMBL38(BIIB059)                | BIIB059                | chembl:CHEMBL3833308 | 63.65  |

|         |                               |                                                                |                           |                      |  |       |
|---------|-------------------------------|----------------------------------------------------------------|---------------------------|----------------------|--|-------|
| CLEC4E  | 26253 GuideToPharmacagonist   | 329968423 GLCC14C18                                            |                           |                      |  |       |
| CLK1    | 1195 GuideToPharmac inhibitor | 249565795 COMPOUND 2 [PMID: 22560567]                          |                           |                      |  |       |
| CLK2    | 1196 DTC                      | GATIFLOXAGATIFLOXACIN                                          | GATIFLOXACIN              | chembl:CHEMBL31      |  | 0.44  |
| CLK3    | 1198 DTC                      | HARMINE HARMINE                                                | HARMINE                   | chembl:CHEMBL269538  |  | 4.24  |
| CLK4    | 57396 DTC                     | TAE-684 TAE-684                                                | TAE-684                   | chembl:CHEMBL509032  |  | 0.01  |
| CLNK    | 116449 PharmGKB               | Antihyperten:Antihypertensives                                 |                           |                      |  |       |
| CLOCK   | 9575 PharmGKB                 | salbutamol salbutamol                                          | ALBUTEROL                 | chembl:CHEMBL714     |  | 10.61 |
| CLU     | 1191 TdgClinicalTrial         | OGX-011 OGX-011                                                | CUSTIRSEN SODIUM          | chembl:CHEMBL2219773 |  | 42.43 |
| CMA1    | 1215 GuideToPharmac inhibitor | 178103177 JNJ-10311795                                         | CHEMBL374027              | chembl:CHEMBL374027  |  | 63.65 |
| CMKLR1  | 1240 GuideToPharmacagonist    | 178100364 RESOLVIN E1                                          |                           |                      |  |       |
| CMKLR2  | 2825 GuideToPharmacagonist    | 135651892 CHEMERIN                                             |                           |                      |  |       |
| CMPK1   | 51727 PharmGKB                | lamivudine lamivudine                                          | LAMIVUDINE                | chembl:CHEMBL141     |  | 0.82  |
| CMTM8   | 152189 PharmGKB               | methylphenidmethylphenidate                                    | METHYLPHENIDATE           | chembl:CHEMBL796     |  | 2.83  |
| CNGA1   | 1259 TTD                      | dequalinium dequalinium                                        | DEQUALINIUM               | chembl:CHEMBL333826  |  | 15.91 |
| CNGA2   | 1260 TTD                      | dequalinium dequalinium                                        | DEQUALINIUM               | chembl:CHEMBL333826  |  | 10.61 |
| CNGA3   | 1261 GuideToPharmac activator | 135651452 CYCLIC AMP                                           |                           |                      |  |       |
| CNPY4   | 245812 PharmGKB               | Tumor necrosTumor necrosis factor alpha (TNF-alpha) inhibitors |                           |                      |  |       |
| CNR1    | 1268 TTD                      | Purine derivaPurine derivative 1                               |                           |                      |  |       |
| CNR2    | 1269 TTD                      | Adamantyl dcAdamantyl derivative 1                             |                           |                      |  |       |
| CNTF    | 1270 TTD                      | NT-501 CNTNT-501 CNTF                                          |                           |                      |  |       |
| CNTFR   | 1271 TTD                      | PegCNTF PegCNTF                                                |                           |                      |  |       |
| COIL    | 8161 NCI                      | EGCG EGCG                                                      | EPIGALOCATECHIN GALLATE   | chembl:CHEMBL297453  |  | 4.9   |
| COL11A1 | 1301 ChemblInteractions       | CHEMBL20OCRIPLASMIN                                            | OCRIPLASMIN               | chembl:CHEMBL2095222 |  | 0.86  |
| COL11A2 | 1302 ChemblInteractions       | CHEMBL21(COLLAGENASE CLOSTRII                                  | COLLAGENASE CLOSTRIDIUM l | chembl:CHEMBL2108709 |  | 1.14  |
| COL15A1 | 1306 ChemblInteractions       | CHEMBL21(COLLAGENASE CLOSTRII                                  | COLLAGENASE CLOSTRIDIUM l | chembl:CHEMBL2108709 |  | 1.14  |
| COL18A1 | 80781 NCI                     | CSF CSF                                                        |                           |                      |  |       |
| COL1A1  | 1277 ChemblInteractions       | CHEMBL21(COLLAGENASE CLOSTRII                                  | COLLAGENASE CLOSTRIDIUM l | chembl:CHEMBL2108709 |  | 2.27  |
| COL1A2  | 1278 TTD                      | Solubilized tySolubilized type 1 native bovine collagen        |                           |                      |  |       |
| COL22A1 | 169044 PharmGKB               | salbutamol salbutamol                                          | ALBUTEROL                 | chembl:CHEMBL714     |  | 10.61 |
| COL24A1 | 255631 ChemblInteractions     | CHEMBL21(COLLAGENASE CLOSTRII                                  | COLLAGENASE CLOSTRIDIUM l | chembl:CHEMBL2108709 |  | 1.14  |
| COL26A1 | 136227 PharmGKB               | aspirin aspirin                                                | ASPIRIN                   | chembl:CHEMBL25      |  | 0.87  |
| COL27A1 | 85301 ChemblInteractions      | CHEMBL20OCRIPLASMIN                                            | OCRIPLASMIN               | chembl:CHEMBL2095222 |  | 0.86  |
| COL28A1 | 340267 ChemblInteractions     | CHEMBL20OCRIPLASMIN                                            | OCRIPLASMIN               | chembl:CHEMBL2095222 |  | 0.86  |
| COL2A1  | 1280 TEND                     | COLLAGENCOLLAGENASE                                            | COLLAGENASE CLOSTRIDIUM l | chembl:CHEMBL2108709 |  | 2.27  |
| COL3A1  | 1281 ChemblInteractions       | CHEMBL21(COLLAGENASE CLOSTRII                                  | COLLAGENASE CLOSTRIDIUM l | chembl:CHEMBL2108709 |  | 2.27  |
| COL4A1  | 1282 ChemblInteractions       | CHEMBL20OCRIPLASMIN                                            | OCRIPLASMIN               | chembl:CHEMBL2095222 |  | 0.86  |
| COL4A2  | 1284 TTD                      | NLG919 NLG919                                                  | NAVOXIMOD                 | chembl:CHEMBL3989951 |  | 7.07  |
| COL4A3  | 1285 ChemblInteractions       | CHEMBL21(COLLAGENASE CLOSTRII                                  | COLLAGENASE CLOSTRIDIUM l | chembl:CHEMBL2108709 |  | 1.14  |
| COL4A4  | 1286 ChemblInteractions       | CHEMBL20OCRIPLASMIN                                            | OCRIPLASMIN               | chembl:CHEMBL2095222 |  | 0.86  |
| COL4A5  | 1287 ChemblInteractions       | CHEMBL21(COLLAGENASE CLOSTRII                                  | COLLAGENASE CLOSTRIDIUM l | chembl:CHEMBL2108709 |  | 1.14  |
| COL4A6  | 1288 ChemblInteractions       | CHEMBL20OCRIPLASMIN                                            | OCRIPLASMIN               | chembl:CHEMBL2095222 |  | 0.86  |
| COL5A1  | 1289 ChemblInteractions       | CHEMBL20OCRIPLASMIN                                            | OCRIPLASMIN               | chembl:CHEMBL2095222 |  | 0.86  |

|          |                                     |                                                          |                         |                      |       |
|----------|-------------------------------------|----------------------------------------------------------|-------------------------|----------------------|-------|
| COL5A2   | 1290 ChEMBLInteractions             | CHEMBL209OCRIPLASMIN                                     | OCRIPLASMIN             | chembl:CHEMBL2095222 | 0.86  |
| COL5A3   | 50509 ChEMBLInteractions            | CHEMBL209OCRIPLASMIN                                     | OCRIPLASMIN             | chembl:CHEMBL2095222 | 0.86  |
| COL6A1   | 1291 ChEMBLInteractions             | CHEMBL21(COLLAGENASE CLOSTRIDIUM)COLLAGENASE CLOSTRIDIUM | COLLAGENASE CLOSTRIDIUM | chembl:CHEMBL2108709 | 1.14  |
| COL6A2   | 1292 ChEMBLInteractions             | CHEMBL21(COLLAGENASE CLOSTRIDIUM)COLLAGENASE CLOSTRIDIUM | COLLAGENASE CLOSTRIDIUM | chembl:CHEMBL2108709 | 1.14  |
| COL6A3   | 1293 ChEMBLInteractions             | CHEMBL21(COLLAGENASE CLOSTRIDIUM)COLLAGENASE CLOSTRIDIUM | COLLAGENASE CLOSTRIDIUM | chembl:CHEMBL2108709 | 1.14  |
| COL6A5   | 256076 ChEMBLInteractions           | CHEMBL21(COLLAGENASE CLOSTRIDIUM)COLLAGENASE CLOSTRIDIUM | COLLAGENASE CLOSTRIDIUM | chembl:CHEMBL2108709 | 1.14  |
| COL6A6   | 131873 ChEMBLInteractions           | CHEMBL209OCRIPLASMIN                                     | OCRIPLASMIN             | chembl:CHEMBL2095222 | 0.86  |
| COMT     | 1312 PharmGKB                       | fluvoxamine fluvoxamine                                  | FLUVOXAMINE             | chembl:CHEMBL814     | 0.31  |
| COP1     | 64326 TTD                           | Flecainide Flecainide                                    | FLECAINIDE              | chembl:CHEMBL652     | 1.82  |
| COQ2     | 27235 PharmGKB                      | atorvastatin atorvastatin                                | ATORVASTATIN            | chembl:CHEMBL1487    | 1.06  |
| COQ8B    | 79934 PharmGKB                      | Immunoglobulin G Immunoglobulins                         |                         |                      |       |
| CORO7    | 79585 PharmGKB                      | methylphenidate methylphenidate                          | METHYLPHENIDATE         | chembl:CHEMBL796     | 2.83  |
| CORT     | 1325 NCI                            | GLUCAGON GLUCAGON                                        | GLUCAGON                | chembl:CHEMBL266481  | 12.73 |
| CP       | 1356 NCI                            | DEXRAZOXINE DEXRAZOXANE                                  | DEXRAZOXANE             | chembl:CHEMBL1738    | 1.52  |
| CPA1     | 1357 GuideToPharmacology inhibitor  | 252166827 COMPOUND 1B [PMID: 18078750]                   |                         |                      |       |
| CPA2     | 1358 PharmGKB                       | asparaginase asparaginase                                | ASPARAGINASE            | chembl:CHEMBL2108989 | 8.49  |
| CPA6     | 57094 PharmGKB                      | metformin metformin                                      | METFORMIN               | chembl:CHEMBL1431    | 3.35  |
| CPB1     | 1360 GuideToPharmacology inhibitor  | 252166875 COMPOUND 3 [PMID: 14640538]                    |                         |                      |       |
| CPB2     | 1361 TTD                            | UK-396082 UK-396082                                      | UK-396,082              | chembl:CHEMBL398110  | 63.65 |
| CPD      | 1362 NCI                            | ANTISERUM ANTISERUM                                      |                         |                      |       |
| CPM      | 1368 GuideToPharmacology inhibitor  | 252166875 COMPOUND 3 [PMID: 14640538]                    |                         |                      |       |
| CPN1     | 1369 GuideToPharmacology inhibitor  | 252166856 SQ-24,798                                      |                         |                      |       |
| CPOX     | 1371 FDA                            | Givosiran Givosiran                                      | GIVOSIRAN               | chembl:CHEMBL4297760 | 42.43 |
| CPS1     | 1373 PharmGKB                       | sodium phenylbutyrate sodium phenylbutyrate              |                         |                      |       |
| CPT1A    | 1374 TEND                           | PERHEXILINE PERHEXILINE                                  | PERHEXILINE             | chembl:CHEMBL75880   | 81.84 |
| CPT1B    | 1375 TTD                            | Levacecarnin Levacecarnine hci                           |                         |                      |       |
| CPT2     | 1376 TEND                           | PERHEXILINE PERHEXILINE                                  | PERHEXILINE             | chembl:CHEMBL75880   | 45.47 |
| CR1      | 1378 PharmGKB                       | eculizumab eculizumab                                    | ECULIZUMAB              | chembl:CHEMBL1201828 | 21.22 |
| CR2      | 1380 NCI                            | ADENOVIRUS ADENOVIRUS VECTOR                             |                         |                      |       |
| CRABP2   | 1382 NCI                            | RETINOID RETINOID                                        |                         |                      |       |
| CRAT     | 1384 TdgClinicalTrial               | PROPIONYL-L-CARNITINE PROPIONYL-L-CARNITINE              |                         |                      |       |
| CRBN     | 51185 ChEMBLInteraction inhibitor   | CHEMBL434-POMALIDOMIDE                                   | POMALIDOMIDE            | chembl:CHEMBL43452   | 18.56 |
| CREB1    | 1385 PharmGKB                       | citalopram citalopram                                    | CITALOPRAM              | chembl:CHEMBL549     | 1.4   |
| CREBBP   | 1387 DTC                            | (-)-ROLIPRAM (-)-ROLIPRAM                                | (-)-ROLIPRAM            | chembl:CHEMBL430893  | 1.06  |
| CRH      | 1392 NCI                            | NALOXONE NALOXONE                                        | NALOXONE                | chembl:CHEMBL80      | 5.79  |
| CRHBP    | 1393 PharmGKB                       | ethanol ethanol                                          | ALCOHOL                 | chembl:CHEMBL545     | 1.48  |
| CRHR1    | 1394 GuideToPharmacology antagonist | 178100512 SSR125543A                                     |                         |                      |       |
| CRHR2    | 1395 NCI                            | INSULIN INSULIN                                          | INSULIN                 | chembl:CHEMBL1201631 | 0.5   |
| CRISPLD2 | 83716 PharmGKB                      | dexamethasone dexamethasone                              | DEXAMETHASONE           | chembl:CHEMBL384467  | 1.52  |
| CRKL     | 1399 CIViC                          | GEFITINIB GEFITINIB                                      | GEFITINIB               | chembl:CHEMBL939     | 0.94  |
| CRLF2    | 64109 CIViC                         | JAK INHIBITOR JAK INHIBITOR I                            |                         |                      |       |
| CRMP1    | 1400 NCI                            | METHIMAZOLE METHIMAZOLE                                  | METHIMAZOLE             | chembl:CHEMBL1515    | 7.07  |

|         |                                  |                                |                                                                              |                              |                      |       |
|---------|----------------------------------|--------------------------------|------------------------------------------------------------------------------|------------------------------|----------------------|-------|
| CROT    | 54677 TdgClinicalTrial           | PROPIONYLPROPIONYL-L-CARNITINE |                                                                              |                              |                      |       |
| CRP     | 1401 PharmGKB                    | rosuvastatin                   | rosuvastatin                                                                 | ROSUVASTATIN                 | chembl:CHEMBL1496    | 3.26  |
| CRTC1   | 23373 ClarityFoundationClinical  | XL765                          | XL765                                                                        |                              |                      |       |
| CRTC2   | 200186 ClarityFoundationClinical | PKI-587                        | PKI-587                                                                      | GEDATOLISIB                  | chembl:CHEMBL592445  | 0.44  |
| CRY1    | 1407 GuideToPharmacology         | 252166810                      | KL044                                                                        |                              |                      |       |
| CRYBG2  | 55057 PharmGKB                   | opioids                        | opioids                                                                      |                              |                      |       |
| CRYGD   | 1421 TTD                         | HE3235                         | HE3235                                                                       | HE3235                       | chembl:CHEMBL3545237 | 15.91 |
| CRYZ    | 1429 DTC                         | 2'-HYDROX                      | 2'-HYDROXYCHALCONE                                                           | 2'-HYDROXYCHALCONE           | chembl:CHEMBL32147   | 21.22 |
| CSF1    | 1435 TTD                         | Emactuzumal                    | Emactuzumab                                                                  | EMACTUZUMAB                  | chembl:CHEMBL3545370 | 15.91 |
| CSF1R   | 1436 GuideToPharmac              | inhibitor                      | 178102292                                                                    | CEDIRANIB                    | chembl:CHEMBL491473  | 0.05  |
| CSF2    | 1437 NCI                         | NORDIHYD                       | NORDIHYDROGUAIARETIC ACID                                                    |                              |                      |       |
| CSF2RA  | 1438 ChemblInteractio            | agonist                        | CHEMBL12(SARGRAMOSTIM                                                        | SARGRAMOSTIM                 | chembl:CHEMBL1201670 | 47.74 |
| CSF2RB  | 1439 TTD                         | TPI ASM8                       | TPI ASM8                                                                     |                              |                      |       |
| CSF3    | 1440 TdgClinicalTrial            | TALABOST                       | TALABOSTAT                                                                   | TALABOSTAT                   | chembl:CHEMBL67279   | 3.18  |
| CSF3R   | 1441 TTD                         | Filgrastim-SN                  | Filgrastim-SNDZ                                                              | FILGRASTIM                   | chembl:CHEMBL1201567 | 8.27  |
| CSH1    | 1442 NCI                         | MARIJUAN                       | MARIJUANA                                                                    |                              |                      |       |
| CSK     | 1445 GuideToPharmac              | inhibitor                      | 223365983                                                                    | RIVOCERANIB                  | chembl:CHEMBL3186534 | 5.3   |
| CSMD1   | 64478 PharmGKB                   | oxaliplatin                    | oxaliplatin                                                                  | OXALIPLATIN                  | chembl:CHEMBL414804  | 1.72  |
| CSNK1A1 | 1452 DTC                         | SP-600125                      | SP-600125                                                                    | SP-600125                    | chembl:CHEMBL1725279 | 0.04  |
| CSNK1D  | 1453 DTC                         | SB-203580                      | SB-203580                                                                    | SB-203580                    | chembl:CHEMBL10      | 0.11  |
| CSNK1E  | 1454 GuideToPharmac              | inhibitor                      | 310264697                                                                    | UMBRALISIB                   | chembl:CHEMBL3948730 | 4.55  |
| CSNK1G1 | 53944 GuideToPharmac             | inhibitor                      | 249565843                                                                    | COMPOUND 33 [PMID: 19364658] |                      |       |
| CSNK1G2 | 1455 DTC                         | PHA-767491                     | PHA-767491                                                                   | CHEMBL225519                 | chembl:CHEMBL225519  | 0.08  |
| CSNK1G3 | 1456 DTC                         | TAK-715                        | TAK-715                                                                      | TAK-715                      | chembl:CHEMBL363648  | 0.53  |
| CSNK2A1 | 1457 GuideToPharmac              | inhibitor                      | 249565806                                                                    | SILMITASERTIB                | chembl:CHEMBL1230165 | 3.18  |
| CSNK2A2 | 1459 TTD                         | US8791257,                     | US8791257, 17                                                                |                              |                      |       |
| CSNK2A3 | 283106 PharmGKB                  | cisplatin                      | cisplatin                                                                    | CISPLATIN                    | chembl:CHEMBL11359   | 0.88  |
| CSPG4   | 1464 NCI                         | TPA                            | TPA                                                                          | ALTEPLASE                    | chembl:CHEMBL1201593 | 6.7   |
| CSRNP3  | 80034 PharmGKB                   | Bisphosphon                    | Bisphosphonates                                                              |                              |                      |       |
| CSRP3   | 8048 PharmGKB                    | Tumor necro                    | Tumor necrosis factor alpha (TNF-alpha) inhibitors                           |                              |                      |       |
| CST3    | 1471 NCI                         | DIGOXIN                        | DIGOXIN                                                                      | DIGOXIN                      | chembl:CHEMBL1751    | 1.87  |
| CST4    | 1472 NCI                         | ANTISERUM                      | ANTISERUM                                                                    |                              |                      |       |
| CST5    | 1473 PharmGKB                    | Tumor necro                    | Tumor necrosis factor alpha (TNF-alpha) inhibitors                           |                              |                      |       |
| CTAG1B  | 1485 NCI                         | TUMOR AN                       | TUMOR ANTIGEN                                                                |                              |                      |       |
| CTAG2   | 30848 CIViC                      | AUTOLOGO                       | AUTOLOGOUS ANTI-NY-ESO-1/LAGE-1 TCR-TRANSDUCED C259 T LYMPHOCYTES GSK3377794 |                              |                      |       |
| CTDSP1  | 58190 DTC                        | GNF-PF-306                     | GNF-PF-3060                                                                  | CHEMBL581449                 | chembl:CHEMBL581449  | 3.35  |
| CTF1    | 1489 TTD                         | Cardiotrophir                  | Cardiotrophin-1                                                              |                              |                      |       |
| CTH     | 1491 PharmGKB                    | busulfan                       | busulfan                                                                     | BUSULFAN                     | chembl:CHEMBL820     | 2.5   |
| CTLA4   | 1493 TALC                        | antibody                       | TREMELIM                                                                     | TREMELIMUMAB                 | chembl:CHEMBL2108658 | 21.22 |
| CTNNA2  | 1496 PharmGKB                    | Tumor necro                    | Tumor necrosis factor alpha (TNF-alpha) inhibitors                           |                              |                      |       |
| CTNNA3  | 29119 PharmGKB                   | antidepressan                  | antidepressants                                                              |                              |                      |       |
| CTNNB1  | 1499 JAX-CKB                     | NVP-TNKS6                      | NVP-TNKS656                                                                  |                              |                      |       |

|         |                                 |                                                                     |               |                      |       |
|---------|---------------------------------|---------------------------------------------------------------------|---------------|----------------------|-------|
| CTNNBL1 | 56259 TTD                       | Beta-acetyldi;Beta-acetyldigoxin                                    | ACETYLDIGOXIN | chembl:CHEMBL2074725 | 31.83 |
| CTPS1   | 1503 TTD                        | CyclopentenyCyclopentenylcytosine                                   |               |                      |       |
| CTRC    | 11330 TTD                       | AC1LCOK0 AC1LCOK0                                                   |               |                      |       |
| CTSA    | 5476 TTD                        | SAR164653 SAR164653                                                 |               |                      |       |
| CTSB    | 1508 TTD                        | DimethoxybeDimethoxybenzylidene-2-thio-imidazole-4-one derivative 1 |               |                      |       |
| CTSC    | 1075 GuideToPharmac inhibitor   | 252166823 COMPOUND 3D [PMID: 3941405]                               |               |                      |       |
| CTSD    | 1509 NCI                        | STREPTOZCSTREPTOZOTOCIN                                             | STREPTOZOCIN  | chembl:CHEMBL1651906 | 2.77  |
| CTSE    | 1510 GuideToPharmac inhibitor   | 178103180 COMPOUND 2 [PMID: 8410973]                                |               |                      |       |
| CTSF    | 8722 TTD                        | PMID279982PMID27998201-Compound-12                                  |               |                      |       |
| CTSG    | 1511 TTD                        | JNJ-1031179.JNJ-10311795                                            | CHEMBL374027  | chembl:CHEMBL374027  | 10.61 |
| CTSH    | 1512 GuideToPharmac inhibitor   | 336446936 COMPOUND 1E [PMID: 27285276]                              |               |                      |       |
| CTSK    | 1513 TTD                        | PMID253997PMID25399719-Compound-17                                  |               |                      |       |
| CTSL    | 1514 TTD                        | PMID279982PMID27998201-Compound-6                                   |               |                      |       |
| CTSO    | 1519 ChemblInteractio inhibitor | CHEMBL481ODANACATIB                                                 | ODANACATIB    | chembl:CHEMBL481611  | 15.91 |
| CTSS    | 1520 TTD                        | PMID279982PMID27998201-Compound-7                                   |               |                      |       |
| CTSV    | 1515 GuideToPharmac inhibitor   | 252166762 CITIBRASINE                                               | CITIBRASINE   | chembl:CHEMBL1668599 | 31.83 |
| CTSZ    | 1522 GuideToPharmac inhibitor   | 178103092 ODANACATIB                                                | ODANACATIB    | chembl:CHEMBL481611  | 15.91 |
| CUBN    | 8029 NCI                        | ANTISERUMANTISERUM                                                  |               |                      |       |
| CUL4A   | 8451 ChemblInteractio inhibitor | CHEMBL848LENALIDOMIDE                                               | LENALIDOMIDE  | chembl:CHEMBL848     | 1.52  |
| CUX2    | 23316 PharmGKB                  | rifampin rifampin                                                   | RIFAMPIN      | chembl:CHEMBL374478  | 3.03  |
| CX3CL1  | 6376 NCI                        | COMPLETE COMPLETE FREUND&APOS;S ADJUVANT                            |               |                      |       |
| CX3CR1  | 1524 GuideToPharmac agonist     | 178100560 [125I]CX3CL1 (HUMAN)                                      |               |                      |       |
| CXCL10  | 3627 NCI                        | RITONAVIRRITONAVIR                                                  | RITONAVIR     | chembl:CHEMBL163     | 0.53  |
| CXCL12  | 6387 PharmGKB                   | fludarabine fludarabine                                             | FLUDARABINE   | chembl:CHEMBL1568    | 0.91  |
| CXCL13  | 10563 PharmGKB                  | rituximab rituximab                                                 | RITUXIMAB     | chembl:CHEMBL1201576 | 9.09  |
| CXCL2   | 2920 NCI                        | BCG BCG                                                             | BCG VACCINE   | wikidata:Q798309     | 2.12  |
| CXCL5   | 6374 PharmGKB                   | hmg coa reduhmg coa reductase inhibitors                            |               |                      |       |
| CXCL8   | 3576 NCI                        | METHIMAZMETHIMAZOLE                                                 | METHIMAZOLE   | chembl:CHEMBL1515    | 0.13  |
| CXCR1   | 3577 GuideToPharmac allosteric  | 252166706 REPARIXIN                                                 | REPARIXIN     | chembl:CHEMBL191413  | 19.1  |
| CXCR2   | 3579 GuideToPharmac agonist     | 178100555 [125I]CXCL5 (HUMAN)                                       |               |                      |       |
| CXCR3   | 2833 GuideToPharmac agonist     | 178100556 [125I]CXCL10 (HUMAN)                                      |               |                      |       |
| CXCR4   | 7852 TALC                       | antagonistLY 2510924 LY 2510924                                     |               |                      |       |
| CXCR5   | 643 TTD                         | SAR113244 SAR113244                                                 |               |                      |       |
| CXCR6   | 10663 GuideToPharmac agonist    | 178100558 [125I]CXCL16 (HUMAN)                                      |               |                      |       |
| CXXC4   | 80319 PharmGKB                  | Platinum conPlatinum compounds                                      |               |                      |       |
| CYB5R1  | 51706 PharmGKB                  | primaquine primaquine                                               | PRIMAQUINE    | chembl:CHEMBL506     | 2.65  |
| CYB5R2  | 51700 PharmGKB                  | primaquine primaquine                                               | PRIMAQUINE    | chembl:CHEMBL506     | 2.65  |
| CYB5R3  | 1727 PharmGKB                   | methylene bltmethylene blue                                         |               |                      |       |
| CYB5R4  | 51167 PharmGKB                  | rasburicase rasburicase                                             | RASBURICASE   | chembl:CHEMBL1201594 | 4.24  |
| CYBA    | 1535 PharmGKB                   | simvastatin simvastatin                                             | SIMVASTATIN   | chembl:CHEMBL1064    | 0.79  |
| CYBB    | 1536 DTC                        | APIGENIN APIGENIN                                                   | APIGENIN      | chembl:CHEMBL28      | 1.57  |
| CYCSP5  | 360158 PharmGKB                 | allopurinol allopurinol                                             | ALLOPURINOL   | chembl:CHEMBL1467    | 3.29  |

|          |                                  |                                                     |                   |                      |       |
|----------|----------------------------------|-----------------------------------------------------|-------------------|----------------------|-------|
| CYP11A1  | 1583 TTD                         | Aminogluteth:Aminoglutethimide                      | AMINOGLUTETHIMIDE | chembl:CHEMBL488     | 22.73 |
| CYP11B1  | 1584 ChEMBLInteraction inhibitor | CHEMBL167:MITOTANE                                  | MITOTANE          | chembl:CHEMBL1670    | 5.97  |
| CYP11B2  | 1585 PharmGKB                    | benazepril benazepril                               | BENAZEPRIL        | chembl:CHEMBL838     | 3.03  |
| CYP17A1  | 1586 GuideToPharmac inhibitor    | 252166838 GALETERONE                                | GALETERONE        | chembl:CHEMBL2105738 | 13.64 |
| CYP19A1  | 1588 TTD                         | BGS-649 BGS-649                                     |                   |                      |       |
| CYP1A1   | 1543 NCI                         | POLYPHENOLPOLYPHENOL                                |                   |                      |       |
| CYP1A2   | 1544 DTC                         | DEXPROPR.DEXPROPRANOLOL                             | DEXPROPRANOLOL    | chembl:CHEMBL275742  | 0.03  |
| CYP1B1   | 1545 NCI                         | AMINOGLUAMINOGLUTETHIMIDE                           | AMINOGLUTETHIMIDE | chembl:CHEMBL488     | 0.65  |
| CYP20A1  | 57404 NCI                        | MBC MBC                                             |                   |                      |       |
| CYP24A1  | 1591 PharmGKB                    | tenofovir disctenofovir disoproxil fumarate         |                   |                      |       |
| CYP26A1  | 1592 TdgClinicalTrial            | LIARAZOLELIARAZOLE                                  | LIARAZOLE         | chembl:CHEMBL389433  | 21.22 |
| CYP26B1  | 56603 TdgClinicalTrial           | TALAROZOTALAROZOLE                                  | TALAROZOLE        | chembl:CHEMBL459505  | 15.91 |
| CYP26C1  | 340665 TdgClinicalTrial          | TALAROZOTALAROZOLE                                  | TALAROZOLE        | chembl:CHEMBL459505  | 15.91 |
| CYP27A1  | 1593 NCI                         | HORMONESHORMONES                                    |                   |                      |       |
| CYP27B1  | 1594 DTC                         | 20S-HYDRO20S-HYDROXYVITAMIN E                       | CHEMBL2036072     | chembl:CHEMBL2036072 | 31.83 |
| CYP2A13  | 1553 PharmGKB                    | nicotine nicotine                                   | NICOTINE          | chembl:CHEMBL3       | 1.3   |
| CYP2A6   | 1548 PharmGKB                    | artesunate artesunate                               | ARTESUNATE        | chembl:CHEMBL361497  | 3.03  |
| CYP2A7P1 | 1550 PharmGKB                    | methadone methadone                                 | METHADONE         | chembl:CHEMBL651     | 4.55  |
| CYP2B6   | 1555 PharmGKB                    | artemisinin artemisinin                             | ARTEMISININ       | chembl:CHEMBL567597  | 0.56  |
| CYP2C18  | 1562 GuideToPharmac inhibitor    | 252827490 COMPOUND 9 [PMID: 11606127]               |                   |                      |       |
| CYP2C19  | 1557 DTC                         | BIOCHANINBIOCHANIN                                  | BIOCHANIN         | chembl:CHEMBL131921  | 0.02  |
| CYP2C8   | 1558 PharmGKB                    | rucaparib rucaparib                                 | RUCAPARIB         | chembl:CHEMBL1173055 | 0.07  |
| CYP2C9   | 1559 DTC                         | CYTARABINCYTARABINE                                 | CYTARABINE        | chembl:CHEMBL803     | 0.01  |
| CYP2D6   | 1565 DTC                         | FLUNISOLIIFLUNISOLIDE                               | FLUNISOLIDE       | chembl:CHEMBL1512    | 0.02  |
| CYP2E1   | 1571 NCI                         | ISOFLAVONISOFLAVONE                                 | ISOFLAVONE        | chembl:CHEMBL366460  | 1.84  |
| CYP2F1   | 1572 PharmGKB                    | imatinib imatinib                                   | IMATINIB          | chembl:CHEMBL941     | 1.99  |
| CYP2J2   | 1573 PharmGKB                    | terfenadine terfenadine                             | TERFENADINE       | chembl:CHEMBL17157   | 1.27  |
| CYP2R1   | 120227 PharmGKB                  | ribavirin ribavirin                                 | RIBAVIRIN         | chembl:CHEMBL1643    | 0.96  |
| CYP3A4   | 1576 PharmGKB                    | oxazepam oxazepam                                   | OXAZEPAM          | chembl:CHEMBL568     | 0     |
| CYP3A43  | 64816 NCI                        | GINKGO GINKGO                                       | GINKGO            | chembl:CHEMBL2108466 | 9.09  |
| CYP3A5   | 1577 PharmGKB                    | fluticasone prfluticasone propionate                |                   |                      |       |
| CYP3A7   | 1551 TdgClinicalTrial            | TESMILIFENTESMILIFENE                               | TESMILIFENE       | chembl:CHEMBL26424   | 0.91  |
| CYP46A1  | 10858 TTD                        | PMID255149PMID25514969-Compound-8                   |                   |                      |       |
| CYP4A11  | 1579 PharmGKB                    | amiloride amiloride                                 | AMILORIDE         | chembl:CHEMBL945     | 2.27  |
| CYP4B1   | 1580 PharmGKB                    | thalidomide thalidomide                             | THALIDOMIDE       | chembl:CHEMBL468     | 1.82  |
| CYP4F11  | 57834 PharmGKB                   | warfarin warfarin                                   | WARFARIN          | chembl:CHEMBL1464    | 3.54  |
| CYP4F2   | 8529 PharmGKB                    | anthracycline anthracyclines and related substances |                   |                      |       |
| CYP51A1  | 1595 GuideToPharmac inhibitor    | 252827457 AZALANSTAT                                | AZALANSTAT        | chembl:CHEMBL70611   | 15.91 |
| CYP7A1   | 1581 PharmGKB                    | cholic acid cholic acid                             |                   |                      |       |
| CYP7B1   | 9420 NCI                         | DIAZOXIDEDIAZOXIDE                                  | DIAZOXIDE         | chembl:CHEMBL181     | 0.98  |
| CYSLTR1  | 10800 GuideToPharmac antagonist  | 178100370 MONTELUKAST                               | MONTELUKAST       | chembl:CHEMBL787     | 2.78  |
| CYSLTR2  | 57105 GuideToPharmac agonist     | 135651514 LTE4                                      |                   |                      |       |

|         |                       |                                                      |                                       |                      |                      |
|---------|-----------------------|------------------------------------------------------|---------------------------------------|----------------------|----------------------|
| CYTH2   | 9266 DTC              | CLOTRIMAZOLE                                         | CLOTRIMAZOLE                          | chembl:CHEMBL104     | 1.82                 |
| DAGLA   | 747 GuideToPharmac    | inhibitor 381744928 LEI105                           |                                       |                      |                      |
| DAGLB   | 221955 GuideToPharmac | inhibitor 178101939 RHC80267                         |                                       |                      |                      |
| DAO     | 1610 DTC              | 5-CARBOXY-5-CARBOXYFURO[3,2-B]P                      | CHEMBL492591                          | chembl:CHEMBL492591  | 31.83                |
| DAOA    | 267012 PharmGKB       | methamphetamine                                      | METHAMPHETAMINE                       | chembl:CHEMBL1201201 | 4.9                  |
| DAPK1   | 1612 GuideToPharmac   | inhibitor 135652717 STAUROSPORINE                    | STAUROSPORINE                         | chembl:CHEMBL388978  | 0.76                 |
| DAPK3   | 1613 DTC              | AST-487                                              | AST-487                               | chembl:CHEMBL574738  | 0.1                  |
| DBH     | 1621 PharmGKB         | Antiinflamm                                          | Antiinflammatory agents, non-steroids |                      |                      |
| DBI     | 1622 NCI              | HORMONES                                             | HORMONES                              |                      |                      |
| DBP     | 1628 NCI              | ALBUMIN                                              | ALBUMIN HUMAN                         | chembl:CHEMBL1201451 | 8.49                 |
| DCAF4   | 26094 PharmGKB        | corticosteroid                                       | corticosteroids                       |                      |                      |
| DCBLD1  | 285761 PharmGKB       | cisplatin                                            | cisplatin                             | CISPLATIN            | chembl:CHEMBL11359   |
| DCK     | 1633 PharmGKB         | idarubicin                                           | idarubicin                            | IDARUBICIN           | chembl:CHEMBL1117    |
| DCLK1   | 9201 DTC              | TAE-684                                              | TAE-684                               | TAE-684              | chembl:CHEMBL509032  |
| DCLK2   | 166614 GuideToPharmac | inhibitor 249565737 XMD8-92                          |                                       |                      |                      |
| DCLK3   | 85443 GuideToPharmac  | inhibitor 249565888 COMPOUND 5N [PMID: 20483621]     |                                       |                      |                      |
| DCN     | 1634 NCI              | IFN                                                  | IFN                                   |                      |                      |
| DCPS    | 28960 TTD             | RG3039                                               | RG3039                                |                      |                      |
| DCT     | 1638 NCI              | FUNGIZONE                                            | FUNGIZONE                             | AMPHOTERICIN B       | chembl:CHEMBL267345  |
| DCTD    | 1635 PharmGKB         | gemcitabine                                          | gemcitabine                           | GEMCITABINE          | chembl:CHEMBL888     |
| DDAH1   | 23576 GuideToPharmac  | inhibitor 252827487 COMPOUND 2E [PMID: 19013076]     |                                       |                      |                      |
| DDB1    | 1642 ChemblInteractio | inhibitor CHEMBL468 THALIDOMIDE                      | THALIDOMIDE                           | chembl:CHEMBL468     | 0.61                 |
| DDC     | 1644 TTD              | Benserazide                                          | Benserazide                           | BENSERAZIDE          | chembl:CHEMBL1096979 |
| DDHD1   | 80821 PharmGKB        | warfarin                                             | warfarin                              | WARFARIN             | chembl:CHEMBL1464    |
| DDIT3   | 1649 NCI              | FENRETININE                                          | FENRETINIDE                           | FENRETINIDE          | chembl:CHEMBL7301    |
| DDIT4   | 54541 TTD             | PF-04523655                                          | PF-04523655                           |                      |                      |
| DDO     | 8528 PharmGKB         | topotecan                                            | topotecan                             | TOPOTECAN            | chembl:CHEMBL84      |
| DDR1    | 780 GuideToPharmac    | inhibitor 381118865 RIPK1 INHIBITOR 22B              |                                       |                      |                      |
| DDR2    | 4921 CIViC            | ERLOTINIB                                            | ERLOTINIB                             | ERLOTINIB            | chembl:CHEMBL553     |
| DDR GK1 | 65992 PharmGKB        | azathioprine                                         | azathioprine                          | AZATHIOPRINE         | chembl:CHEMBL1542    |
| DDX43   | 55510 CIViC           | MEK INHIBITOR                                        | MEK INHIBITOR PD0325901               |                      |                      |
| DDX5    | 1655 TTD              | RX-5902                                              | RX-5902                               |                      |                      |
| DEFA1   | 1667 NCI              | CORTISOL                                             | CORTISOL                              | HYDROCORTISONE       | chembl:CHEMBL389621  |
| DEFA4   | 1669 NCI              | CYTOKINES                                            | CYTOKINES                             |                      |                      |
| DEFA5   | 1670 NCI              | SALT                                                 | SALT                                  | VOLANESORSEN SODIUM  | chembl:CHEMBL3544989 |
| DEGS1   | 8560 GuideToPharmac   | inhibitor 252827536 RBM2-1B                          |                                       |                      |                      |
| DEPTOR  | 64798 MyCancerGenom   | inhibitor OSI-027                                    | OSI-027                               | OSI-027              | chembl:CHEMBL3120215 |
| DES     | 1674 NCI              | TPA                                                  | TPA                                   | ALTEPLASE            | chembl:CHEMBL1201593 |
| DFFB    | 1677 NCI              | CURCUMIN                                             | CURCUMIN                              | CURCUMIN             | chembl:CHEMBL116438  |
| DGAT1   | 8694 TTD              | Pyrazolo[1,5-Pyrazolo[1,5-a]pyrimidine derivative 29 |                                       |                      |                      |
| DGAT2   | 84649 TTD             | Vitamin B3                                           | Vitamin B3                            |                      |                      |
| DGKB    | 1607 PharmGKB         | antipsychotic:                                       | antipsychotics                        |                      |                      |

|          |                                |                                                  |             |                     |                      |        |
|----------|--------------------------------|--------------------------------------------------|-------------|---------------------|----------------------|--------|
| DHCR24   | 1718 TTD                       | T-226293                                         | T-226293    |                     |                      |        |
| DHCR7    | 1717 PharmGKB                  | cholic acid                                      | cholic acid |                     |                      |        |
| DHFR     | 1719 TdgClinicalTrial          | 10-PROPAR(10-PROPARGYL-10-DEAZA/PRALATREXATE     |             |                     | chembl:CHEMBL1201746 | 7.96   |
| DHODH    | 1723 DTC                       | LEFLUNOMLEFLUNOMIDE                              | LEFLUNOMIDE |                     | chembl:CHEMBL960     | 25.2   |
| DHPS     | 1725 NCI                       | DEOXYSPIDEOXYSPERGUALIN                          |             |                     |                      |        |
| DHRS9    | 10170 DTC                      | (+)-ISOZON(+)-ISOZONARONE                        |             | CHEMBL459574        | chembl:CHEMBL459574  | 18.19  |
| DHX36    | 170506 DTC                     | MANOALIDMANOALIDE                                |             | MANOALIDE           | chembl:CHEMBL463914  | 63.65  |
| DIABLO   | 56616 NCI                      | CEPHALOS`CEPHALOSTATIN                           |             |                     |                      |        |
| DIAPH3   | 81624 PharmGKB                 | hydrochlorotlhydrochlorothiazide                 |             | HYDROCHLOROTHIAZIDE | chembl:CHEMBL435     | 1.77   |
| DIO1     | 1733 ChemblInteractioinhibitor | CHEMBL151PROPYLTHIOURACIL                        |             | PROPYLTHIOURACIL    | chembl:CHEMBL1518    | 7.49   |
| DKC1     | 1736 TdgClinicalTrial          | V934/V935 V934/V935                              |             |                     |                      |        |
| DKK1     | 22943 CIViC                    | FLUOROURFLUOROURACIL                             |             | FLUOROURACIL        | chembl:CHEMBL185     | 0.2    |
| DKK3     | 27122 TTD                      | REIC gene thREIC gene therapy                    |             |                     |                      |        |
| DLG4     | 1742 NCI                       | L-DOPA L-DOPA                                    |             | LEVODOPA            | chembl:CHEMBL1009    | 1.72   |
| DLG5     | 9231 PharmGKB                  | capecitabine capecitabine                        |             | CAPECITABINE        | chembl:CHEMBL1773    | 0.88   |
| DLK1     | 8788 TTD                       | GDC0134 GDC0134                                  |             |                     |                      |        |
| DLL3     | 10683 TTD                      | AMG 119 AMG 119                                  |             |                     |                      |        |
| DLL4     | 54567 TALC                     | antibody REGN421 REGN421                         |             |                     |                      |        |
| DMD      | 1756 TTD                       | Ataluren Ataluren                                |             | ATALUREN            | chembl:CHEMBL256997  | 7.07   |
| DMPK     | 1760 GuideToPharmacinhibitor   | 249565832 RKI-1447                               |             |                     |                      |        |
| DNAH8    | 1769 TTD                       | LYC-30937 LYC-30937                              |             |                     |                      |        |
| DNAJB1   | 3337 NCI                       | HSP70 HSP70                                      |             |                     |                      |        |
| DNASE1L3 | 1776 TTD                       | CyclopropylaCyclopropylamine derivative 11       |             |                     |                      |        |
| DNER     | 92737 TTD                      | Pyrimido-indPyrimido-indole derivative 1         |             |                     |                      |        |
| DNMT1    | 1786 TTD                       | GuadecitabinGuadecitabine                        |             | GUADECITABINE       | chembl:CHEMBL3544916 | 2.36   |
| DNMT3A   | 1788 TTD                       | PMID273765PMID27376512-Compound-MTC-423          |             |                     |                      |        |
| DNMT3B   | 1789 TTD                       | PMID273765PMID27376512-Compound-MTC-423          |             |                     |                      |        |
| DNMT3L   | 29947 TTD                      | PMID273765PMID27376512-Compound-Figure2aExample1 |             |                     |                      |        |
| DNPEP    | 23549 GuideToPharmacinhibitor  | 252166877 COMPOUND 9 [PMID: 1738140]             |             |                     |                      |        |
| DNTT     | 1791 NCI                       | HYDROXYUHYDROXYUREA                              |             | HYDROXYUREA         | chembl:CHEMBL467     | 2.27   |
| DOCK10   | 55619 NCI                      | INTERLEUKINTERLEUKIN-4                           |             |                     |                      |        |
| DOCK8    | 81704 PharmGKB                 | carboplatin carboplatin                          |             | CARBOPLATIN         | chembl:CHEMBL1351    | 0.81   |
| DOK5     | 55816 PharmGKB                 | dexamethasoidexamethasone                        |             | DEXAMETHASONE       | chembl:CHEMBL384467  | 0.15   |
| DOT1L    | 84444 GuideToPharmacinhibitor  | 178103597 BROMO-DEAZA-SAH                        |             |                     |                      |        |
| DPEP1    | 1800 TEND                      | CILASTATIFCILASTATIN                             |             | CILASTATIN          | chembl:CHEMBL766     | 275.82 |
| DPP4     | 1803 ChemblInteractioinhibitor | CHEMBL21(OMARIGLIPTIN                            |             | OMARIGLIPTIN        | chembl:CHEMBL2105762 | 3.82   |
| DPP6     | 1804 PharmGKB                  | ethanol ethanol                                  |             | ALCOHOL             | chembl:CHEMBL545     | 0.74   |
| DPP7     | 29952 TTD                      | CRWCYVOICRWYVOHVXAEMF-LBPRGKRZSA-N               |             |                     |                      |        |
| DPP8     | 54878 GuideToPharmacinhibitor  | 178103150 COMPOUND 18 [PMID: 15664838]           |             |                     |                      |        |
| DPP9     | 91039 TTD                      | Talabostat Talabostat                            |             | TALABOSTAT          | chembl:CHEMBL67279   | 12.73  |
| DPYD     | 1806 FDA                       | Capecitabine Capecitabine                        |             | CAPECITABINE        | chembl:CHEMBL1773    | 0.98   |
| DPYS     | 1807 PharmGKB                  | fluorouracil fluorouracil                        |             | FLUOROURACIL        | chembl:CHEMBL185     | 0.4    |

|         |                                  |                                                      |                    |                      |       |
|---------|----------------------------------|------------------------------------------------------|--------------------|----------------------|-------|
| DPYSL2  | 1808 TdgClinicalTrial            | LACOSAMILACOSAMIDE                                   | ERLOSAMIDE         | chembl:CHEMBL58323   | 10.61 |
| DPYSL3  | 1809 NCI                         | METHIMAZMETHIMAZOLE                                  | METHIMAZOLE        | chembl:CHEMBL1515    | 7.07  |
| DRAM1   | 55332 NCI                        | CISPLATIN CISPLATIN                                  | CISPLATIN          | chembl:CHEMBL11359   | 0.88  |
| DRD1    | 1812 DTC                         | PROMAZINIPROMAZINE                                   | PROMAZINE          | chembl:CHEMBL564     | 0.11  |
| DRD2    | 1813 TdgClinicalTrial            | ASENAPINEASENAPINE                                   | ASENAPINE          | chembl:CHEMBL3187365 | 0.11  |
| DRD3    | 1814 PharmGKB                    | methampheta methamphetamine                          | METHAMPHETAMINE    | chembl:CHEMBL1201201 | 0.06  |
| DRD4    | 1815 ChemblInteractio antagonist | CHEMBL12(LOXAPINE SUCCINATE                          | LOXAPINE SUCCINATE | chembl:CHEMBL1201155 | 0.17  |
| DRD5    | 1816 GuideToPharmac agonist      | 135650737 N-PROPYLNORAPOMORPHINE                     |                    |                      |       |
| DROSHA  | 29102 PharmGKB                   | daunorubicin daunorubicin                            | DAUNORUBICIN       | chembl:CHEMBL178     | 0.28  |
| DSCAM   | 1826 PharmGKB                    | carboplatin carboplatin                              | CARBOPLATIN        | chembl:CHEMBL1351    | 0.81  |
| DSE     | 29940 PharmGKB                   | abiraterone abiraterone                              | ABIRATERONE        | chembl:CHEMBL254328  | 6.37  |
| DSG1    | 1828 NCI                         | PD-98059 PD-98059                                    | CHEMBL35482        | chembl:CHEMBL35482   | 3.44  |
| DSG3    | 1830 TdgClinicalTrial            | DESMOGLEDESMOGLEIN-3                                 |                    |                      |       |
| DSP     | 1832 NCI                         | ENALAPRILENALAPRIL                                   | ENALAPRIL          | chembl:CHEMBL578     | 6.37  |
| DTNBP1  | 84062 PharmGKB                   | methampheta methamphetamine                          | METHAMPHETAMINE    | chembl:CHEMBL1201201 | 1.22  |
| DTYMK   | 1841 NCI                         | 5-FU 5-FU                                            | FLUOROURACIL       | chembl:CHEMBL185     | 0.3   |
| DUOX2   | 50506 GuideToPharmac inhibitor   | 363894227 NSC 780521                                 |                    |                      |       |
| DUSP1   | 1843 TTD                         | Avastin+/-Ta:Avastin+/-Tarceva                       |                    |                      |       |
| DUSP3   | 1845 DTC                         | LOMOFUNCLOMOFUNGIN                                   | LOMOFUNGIN         | chembl:CHEMBL1505471 | 0.61  |
| DUSP6   | 1848 NCI                         | DIMETHYL DIMETHYL SULFOXIDE                          |                    |                      |       |
| DUT     | 1854 TTD                         | TAS-114 TAS-114                                      |                    |                      |       |
| DYNC2H1 | 79659 PharmGKB                   | Platinum cor:Platinum compounds                      |                    |                      |       |
| DYRK1A  | 1859 TTD                         | PMID287663PMID28766366-Compound-Scheme1 WO2011135259 |                    |                      |       |
| DYRK1B  | 9149 DTC                         | RG-1530 RG-1530                                      | RG-1530            | chembl:CHEMBL1980391 | 0.06  |
| DYRK2   | 8445 TTD                         | PMID287663PMID28766366-Compound-Scheme21Left         |                    |                      |       |
| DYRK3   | 8444 DTC                         | SORAFENIBSORAFENIB                                   | SORAFENIB          | chembl:CHEMBL1336    | 0.07  |
| DYRK4   | 8798 GuideToPharmac inhibitor    | 249565847 LEUCETTINE L41                             |                    |                      |       |
| E2F1    | 1869 NCI                         | GP-120 GP-120                                        |                    |                      |       |
| E2F7    | 144455 PharmGKB                  | tamoxifen tamoxifen                                  | TAMOXIFEN          | chembl:CHEMBL83      | 2.16  |
| EBP     | 10682 TTD                        | SR-31747 SR-31747                                    |                    |                      |       |
| ECE1    | 1889 GuideToPharmac inhibitor    | 178103120 DAGLUTRIL                                  | DAGLUTRIL          | chembl:CHEMBL3989794 | 15.91 |
| ECE2    | 9718 GuideToPharmac inhibitor    | 252166873 COMPOUND 1 [PMID: 18507370]                |                    |                      |       |
| ECT2L   | 345930 PharmGKB                  | anthracycline anthracyclines and related substances  |                    |                      |       |
| EDA2R   | 60401 GuideToPharmacology        | 178102764 ECTODYSPLASIN A2                           |                    |                      |       |
| EDAR    | 10913 GuideToPharmacology        | 178102765 ECTODYSPLASIN A1                           |                    |                      |       |
| EDN1    | 1906 PharmGKB                    | muraglitazar muraglitazar                            | MURAGLITAZAR       | chembl:CHEMBL186179  | 1.77  |
| EDN3    | 1908 NCI                         | HUMAN CHHUMAN CHORIONIC GONADOTROPIN                 |                    |                      |       |
| EDNRA   | 1909 GuideToPharmac antagonist   | 178100518 ZIBOTENTAN                                 | ZIBOTENTAN         | chembl:CHEMBL1628688 | 14.14 |
| EDNRB   | 1910 NCI                         | PACLITAXEPACLITAXEL                                  | PACLITAXEL         | chembl:CHEMBL428647  | 0.13  |
| EED     | 8726 TTD                         | MAK683 MAK683                                        |                    |                      |       |
| EEF1A1  | 1915 DTC                         | SPARSOMY SPARSOMYCIN                                 | SPARSOMYCIN        | chembl:CHEMBL2303630 | 127.3 |
| EEF2    | 1938 TdgClinicalTrial            | SS1(DSFV)-ISS1(DSFV)-PE38                            |                    |                      |       |

|          |                       |                |                                         |                    |                      |        |
|----------|-----------------------|----------------|-----------------------------------------|--------------------|----------------------|--------|
| EEF2K    | 29904 TTD             | Lapatinib      | Lapatinib                               | LAPATINIB          | chembl:CHEMBL554     | 2.36   |
| EGF      | 1950 PharmGKB         | cetuximab      | cetuximab                               | CETUXIMAB          | chembl:CHEMBL1201577 | 3.45   |
| EGFL7    | 51162 TTD             | MEGF0444       | MEGF0444                                | PARSATUZUMAB       | chembl:CHEMBL2109387 | 190.95 |
| EGFR     | 1956 TTD              | AMG 595        | AMG 595                                 |                    |                      |        |
| EGLN1    | 54583 DTC             | L-4-THIOPR     | L-4-THIOPROLINE                         | CHEMBL1800368      | chembl:CHEMBL1800368 | 7.96   |
| EGLN2    | 112398 TTD            | BAY-85-393     | BAY-85-3934                             |                    |                      |        |
| EGLN3    | 112399 GuideToPharmac | inhibitor      | 252827454 COMPOUND 6EE [PMID: 22364528] |                    |                      |        |
| EGR1     | 1958 DTC              | GENIPIN        | GENIPIN                                 | GENIPIN            | chembl:CHEMBL459016  | 127.3  |
| EGR2     | 1959 NCI              | RETINOIC       | RETINOIC ACID                           |                    |                      |        |
| EHMT1    | 79813 GuideToPharmac  | inhibitor      | 249565918 A-366                         |                    |                      |        |
| EHMT2    | 10919 DTC             | LISINOPRIL     | LISINOPRIL HYDRATE                      | LISINOPRIL HYDRATE | chembl:CHEMBL1729579 | 0.04   |
| EIF2AK1  | 27102 GuideToPharmac  | inhibitor      | 381118865 RIPK1 INHIBITOR 22B           |                    |                      |        |
| EIF2AK2  | 5610 NCI              | RICIN          | RICIN                                   |                    |                      |        |
| EIF2AK3  | 9451 TTD              | Indoline deriv | Indoline derivative 7                   |                    |                      |        |
| EIF2AK4  | 440275 PharmGKB       | olanzapine     | olanzapine                              | OLANZAPINE         | chembl:CHEMBL715     | 0.31   |
| EIF2B1   | 1967 NCI              | WORTMAN        | WORTMANNIN                              | WORTMANNIN         | chembl:CHEMBL428496  | 3.54   |
| EIF2S1   | 1965 NCI              | STAUROSP       | STAUROSPORINE                           | STAUROSPORINE      | chembl:CHEMBL388978  | 3.03   |
| EIF3A    | 8661 PharmGKB         | Platinum con   | Platinum compounds                      |                    |                      |        |
| EIF4A1   | 1973 DTC              | SILVESTRO      | SILVESTROL                              | SILVESTROL         | chembl:CHEMBL555196  | 63.65  |
| EIF4E    | 1977 NCI              | ETOPOSIDE      | ETOPOSIDE                               | ETOPOSIDE          | chembl:CHEMBL44657   | 0.82   |
| EIF4EBP1 | 1978 NCI              | PACLITAXE      | PACLITAXEL                              | PACLITAXEL         | chembl:CHEMBL428647  | 1.31   |
| EIF4G1   | 1981 NCI              | INSULIN        | INSULIN                                 | INSULIN            | chembl:CHEMBL1201631 | 2.5    |
| EIF4H    | 7458 DTC              | GNF-PF-461     | GNF-PF-4618                             | CHEMBL585964       | chembl:CHEMBL585964  | 31.83  |
| EIF5A    | 1984 TdgClinicalTrial | SNS01-T        | SNS01-T                                 |                    |                      |        |
| ELANE    | 1991 TTD              | 2-pyrazinone   | 2-pyrazinone derivative 2               |                    |                      |        |
| ELAVL1   | 1994 DTC              | DEHYDROM       | DEHYDROMUTACTIN                         | DEHYDROMUTACTIN    | chembl:CHEMBL1242196 | 63.65  |
| ELK1     | 2002 NCI              | DHPG           | DHPG                                    |                    |                      |        |
| ELN      | 2006 TdgClinicalTrial | PRT-201        | PRT-201                                 | VONAPANITASE       | chembl:CHEMBL3545070 | 127.3  |
| ELP5     | 23587 PharmGKB        | methylphenid   | methylphenidate                         | METHYLPHENIDATE    | chembl:CHEMBL796     | 2.83   |
| EML4     | 27436 JAX-CKB         | TAE226         | TAE226                                  |                    |                      |        |
| EMP1     | 2012 NCI              | GEFITINIB      | GEFITINIB                               | GEFITINIB          | chembl:CHEMBL939     | 1.87   |
| EMP2     | 2013 NCI              | HORMONES       | HORMONES                                |                    |                      |        |
| ENG      | 2022 GuideToPharmac   | antibody       | 315661183 CAROTUXIMAB                   | CAROTUXIMAB        | chembl:CHEMBL2109321 | 127.3  |
| ENO2     | 2026 NCI              | NERVE GRC      | NERVE GROWTH FACTOR                     |                    |                      |        |
| ENOSF1   | 55556 PharmGKB        | fluorouracil   | fluorouracil                            | FLUOROURACIL       | chembl:CHEMBL185     | 0.73   |
| ENPEP    | 2028 TTD              | QGC-001        | QGC-001                                 |                    |                      |        |
| ENPP2    | 5168 GuideToPharmac   | inhibitor      | 315661229 EXAMPLE 2 [WO2013054185]      |                    |                      |        |
| ENPP3    | 5169 TTD              | AGS-16C3F      | AGS-16C3F                               |                    |                      |        |
| ENTPD1   | 953 GuideToPharmac    | inhibitor      | 315661108 PSB-0963                      | CHEMBL608559       | chembl:CHEMBL608559  | 63.65  |
| ENTPD2   | 954 GuideToPharmac    | inhibitor      | 315661118 PSB-6426                      | CHEMBL469212       | chembl:CHEMBL469212  | 63.65  |
| EP300    | 2033 GuideToPharmac   | inhibitor      | 178103579 CURCUMIN                      | CURCUMIN           | chembl:CHEMBL116438  | 0.13   |
| EPAS1    | 2034 DTC              | PUUPEHEN       | PUUPEHENONE                             | PUUPEHENONE        | chembl:CHEMBL157844  | 21.22  |

|        |                         |           |                                                   |                     |                      |       |
|--------|-------------------------|-----------|---------------------------------------------------|---------------------|----------------------|-------|
| EPB41  | 2035 PharmGKB           | bupropion | bupropion                                         | BUPROPION           | chembl:CHEMBL894     | 1.87  |
| EPCAM  | 4072 TdgClinicalTrial   | VB4-845   | VB4-845                                           | OPORTUZUMAB MONATOX | chembl:CHEMBL1743052 | 15.91 |
| EPHA1  | 2041 GuideToPharmac     | inhibitor | 249565804 COMPOUND 20 [PMID: 23489211]            |                     |                      |       |
| EPHA10 | 284656 ChemblInteractio | inhibitor | CHEMBL24{VANDETANIB                               | VANDETANIB          | chembl:CHEMBL24828   | 1.18  |
| EPHA2  | 1969 DoCM               |           | DASATINIB DASATINIB                               | DASATINIB           | chembl:CHEMBL1421    | 0.64  |
| EPHA3  | 2042 GuideToPharmac     | inhibitor | 249565850 COMPOUND 8H [PMID: 21561767]            |                     |                      |       |
| EPHA4  | 2043 ChemblInteractio   | inhibitor | CHEMBL24{VANDETANIB                               | VANDETANIB          | chembl:CHEMBL24828   | 1.18  |
| EPHA5  | 2044 GuideToPharmac     | inhibitor | 249565821 COMPOUND 66 [PMID: 19788238]            |                     |                      |       |
| EPHA6  | 285220 DTC              | inhibitor | HESPERADIHESPERADIN                               | HESPERADIN          | chembl:CHEMBL514409  | 0.8   |
| EPHA7  | 2045 DTC                | inhibitor | HESPERADIHESPERADIN                               | HESPERADIN          | chembl:CHEMBL514409  | 0.8   |
| EPHA8  | 2046 NCI                |           | GENISTEIN GENISTEIN                               | GENISTEIN           | chembl:CHEMBL44      | 1.18  |
| EPHB1  | 2047 ChemblInteractio   | inhibitor | CHEMBL24{VANDETANIB                               | VANDETANIB          | chembl:CHEMBL24828   | 0.39  |
| EPHB2  | 2048 TTD                |           | MK-8353 MK-8353                                   | MK-8353             | chembl:CHEMBL3545001 | 7.07  |
| EPHB3  | 2049 ChemblInteractio   | inhibitor | CHEMBL24{VANDETANIB                               | VANDETANIB          | chembl:CHEMBL24828   | 1.18  |
| EPHB4  | 2050 ChemblInteractio   | inhibitor | CHEMBL35{TESEVATINIB                              | TESEVATINIB         | chembl:CHEMBL3544983 | 13.64 |
| EPHB6  | 2051 ChemblInteractio   | inhibitor | CHEMBL24{VANDETANIB                               | VANDETANIB          | chembl:CHEMBL24828   | 1.18  |
| EPHX1  | 2052 PharmGKB           |           | docetaxel docetaxel                               | DOCETAXEL           | chembl:CHEMBL92      | 0.23  |
| EPHX2  | 2053 GuideToPharmac     | inhibitor | 178101928 PF750                                   |                     |                      |       |
| EPM2A  | 7957 PharmGKB           |           | olanzapine olanzapine                             | OLANZAPINE          | chembl:CHEMBL715     | 0.27  |
| EPO    | 2056 NCI                |           | ALPHA INTIALPHA INTERFERON                        | CETUXIMAB           | chembl:CHEMBL1201577 | 1.48  |
| EPOR   | 2057 TEND               |           | METHOXY IMETHOXY POLYETHYLENE GLYCOL-EPOETIN BETA |                     |                      |       |
| EPRS1  | 2058 TdgClinicalTrial   |           | HALOFUGINHALOFUGINONE                             | HALOFUGINONE        | chembl:CHEMBL1197091 | 21.22 |
| ERAP1  | 51752 DTC               |           | TCMDC-124TCMDC-124377                             | CHEMBL531269        | chembl:CHEMBL531269  | 3.54  |
| ERAP2  | 64167 GuideToPharmac    | inhibitor | 348353642 COMPOUND 3V [PMID: 27390066]            |                     |                      |       |
| ERBB2  | 2064 NCI                |           | EMODIN EMODIN                                     | EMODIN              | chembl:CHEMBL289277  | 0.03  |
| ERBB3  | 2065 GuideToPharmac     | antibody  | 252827373 ELGEMTUMAB                              | ELGEMTUMAB          | chembl:CHEMBL4298013 | 2.12  |
| ERBB4  | 2066 PharmGKB           |           | paliperidone paliperidone                         | PALIPERIDONE        | chembl:CHEMBL1621    | 0.37  |
| ERCC1  | 2067 CIViC              |           | PACLITAXEPACLITAXEL                               | PACLITAXEL          | chembl:CHEMBL428647  | 0.15  |
| ERCC2  | 2068 CIViC              |           | CARBOPLA CARBOPLATIN                              | CARBOPLATIN         | chembl:CHEMBL1351    | 0.16  |
| ERCC3  | 2071 PharmGKB           |           | Platinum cor:Platinum compounds                   |                     |                      |       |
| ERCC4  | 2072 PharmGKB           |           | Platinum cor:Platinum compounds                   |                     |                      |       |
| ERCC5  | 2073 PharmGKB           |           | platinum platinum                                 | PLATINUM            | chembl:CHEMBL1235478 | 9.09  |
| ERCC6  | 2074 NCI                |           | CSA CSA                                           | CYCLOSPORINE        | chembl:CHEMBL160     | 1.03  |
| EREG   | 2069 PharmGKB           |           | cetuximab cetuximab                               | CETUXIMAB           | chembl:CHEMBL1201577 | 2.22  |
| ERG    | 2078 DTC                |           | MMV009085MMV009085                                | CHEMBL581225        | chembl:CHEMBL581225  | 0.38  |
| ERICH3 | 127254 PharmGKB         |           | citalopram citalopram                             | CITALOPRAM          | chembl:CHEMBL549     | 1.87  |
| ERN1   | 2081 GuideToPharmac     | inhibitor | 249565809 COMPOUND 34 [PMID: 24749861]            |                     |                      |       |
| ERRF11 | 54206 CIViC             |           | ERLOTINIB ERLOTINIB                               | ERLOTINIB           | chembl:CHEMBL553     | 2.6   |
| ESR1   | 2099 TTD                |           | Premarin/Pra:Premarin/Pravachol                   |                     |                      |       |
| ESR2   | 2100 TTD                |           | VG-101 VG-101                                     |                     |                      |       |
| ESRRA  | 2101 TTD                |           | D-5519 D-5519                                     |                     |                      |       |
| ESRRB  | 2103 GuideToPharmac     | agonist   | 135649858 DAIDZEIN                                | DAIDZEIN            | chembl:CHEMBL8145    | 0.92  |

|          |                                  |                                                            |                               |                           |                      |       |
|----------|----------------------------------|------------------------------------------------------------|-------------------------------|---------------------------|----------------------|-------|
| ESRRG    | 2104 NCI                         | DES                                                        | DES                           | DIETHYLSTILBESTROL        | chembl:CHEMBL411     | 1.82  |
| ESYT2    | 57488 PharmGKB                   | methylphenidmethylphenidate                                |                               | METHYLPHENIDATE           | chembl:CHEMBL796     | 2.83  |
| ETFDH    | 2110 PharmGKB                    | methylphenidmethylphenidate                                |                               | METHYLPHENIDATE           | chembl:CHEMBL796     | 2.83  |
| ETS2     | 2114 TTD                         | TK216                                                      | TK216                         |                           |                      |       |
| ETV1     | 2115 CIViC                       | TRAMETINITRAMETINIB                                        |                               | TRAMETINIB                | chembl:CHEMBL2103875 | 3.03  |
| ETV4     | 2118 CIViC                       | TRAMETINITRAMETINIB                                        |                               | TRAMETINIB                | chembl:CHEMBL2103875 | 3.03  |
| ETV5     | 2119 CIViC                       | TRAMETINITRAMETINIB                                        |                               | TRAMETINIB                | chembl:CHEMBL2103875 | 3.03  |
| ETV6     | 2120 JAX-CKB                     | AZD4547                                                    | AZD4547                       |                           |                      |       |
| EWSR1    | 2130 CIViC                       | SUNITINIB                                                  | SUNITINIB                     | SUNITINIB                 | chembl:CHEMBL535     | 3.18  |
| EXO1     | 9156 PharmGKB                    | capecitabine                                               | capecitabine                  | CAPECITABINE              | chembl:CHEMBL1773    | 0.88  |
| EYA2     | 2139 DTC                         | NSC-127133                                                 | NSC-127133                    | CHEMBL1172911             | chembl:CHEMBL1172911 | 0.71  |
| EYS      | 346007 PharmGKB                  | HMG CoA reHMG CoA reductase inhibitors, other combinations |                               |                           |                      |       |
| EZH1     | 2145 GuideToPharmac inhibitor    | 249565920                                                  | GSK343                        |                           |                      |       |
| EZH2     | 2146 TTD                         | GSK2816126                                                 | GSK2816126                    |                           |                      |       |
| EZR      | 7430 NCI                         | TNF-ALPHA                                                  | TNF-ALPHA                     |                           |                      |       |
| F10      | 2159 TTD                         | Apixaban                                                   | Apixaban                      | APIXABAN                  | chembl:CHEMBL231779  | 5.79  |
| F11      | 2160 TdgClinicalTrial            | ANTITHROMANTITHROMBIN                                      |                               |                           |                      |       |
| F12      | 2161 TdgClinicalTrial            | ANTITHROMANTITHROMBIN                                      |                               |                           |                      |       |
| F13A1    | 2162 PharmGKB                    | photodynamic therapy                                       | photodynamic therapy          |                           |                      |       |
| F13B     | 2165 TTD                         | NN1841                                                     | NN1841                        |                           |                      |       |
| F2       | 2147 TTD                         | Anisindione                                                | Anisindione                   | ANISINDIONE               | chembl:CHEMBL712     | 0.35  |
| F2R      | 2149 ChemblInteraction inhibitor | CHEMBL201RIGOSERTIB SODIUM                                 |                               | RIGOSERTIB SODIUM         | chembl:CHEMBL2013119 | 3.98  |
| F2RL1    | 2150 DTC                         | ERYTHROMERYTHROMYCIN                                       |                               | ERYTHROMYCIN              | chembl:CHEMBL532     | 0.71  |
| F2RL2    | 2151 TdgClinicalTrial            | VORAPAXAVORAPAXAR                                          |                               | VORAPAXAR                 | chembl:CHEMBL493982  | 10.61 |
| F2RL3    | 9002 GuideToPharmac antagonist   | 381744952                                                  | RAG8                          |                           |                      |       |
| F3       | 2152 TTD                         | ALT-836                                                    | ALT-836                       |                           |                      |       |
| F5       | 2153 PharmGKB                    | drotrecogin                                                | aldrotrecogin alfa            |                           |                      |       |
| F7       | 2155 TTD                         | Vatreptacog                                                | αVatreptacog alfa (activated) |                           |                      |       |
| F8       | 2157 NCI                         | C5A                                                        | C5A                           |                           |                      |       |
| F9       | 2158 ChemblInteractions          | CHEMBL38EMICIZUMAB                                         |                               | EMICIZUMAB                | chembl:CHEMBL3833393 | 27.85 |
| FAAH     | 2166 TTD                         | Azetidine ure                                              | Azetidine urea derivative 3   |                           |                      |       |
| FAAH2    | 158584 GuideToPharmac inhibitor  | 310264767                                                  | LY2077855                     |                           |                      |       |
| FABP1    | 2168 TTD                         | FENOFIBRIC                                                 | FENOFIBRIC ACID               |                           |                      |       |
| FABP3    | 2170 GuideToPharmac inhibitor    | 252827455                                                  | COMPOUND 13 [PMID: 17502136]  |                           |                      |       |
| FABP4    | 2167 TTD                         | PMID271095                                                 | PMID27109571-Compound-25      |                           |                      |       |
| FABP5    | 2171 TTD                         | PMID271095                                                 | PMID27109571-Compound-30      |                           |                      |       |
| FADD     | 8772 NCI                         | FAS LIGANIFAS LIGAND                                       |                               |                           |                      |       |
| FAM177A1 | 283635 PharmGKB                  | lithium                                                    | lithium                       | LITHIUM                   | chembl:CHEMBL2146126 | 2.77  |
| FAM178B  | 51252 PharmGKB                   | lithium                                                    | lithium                       | LITHIUM                   | chembl:CHEMBL2146126 | 2.77  |
| FANCA    | 2175 CIViC                       | CISPLATIN                                                  | CISPLATIN                     | CISPLATIN                 | chembl:CHEMBL11359   | 0.88  |
| FANCC    | 2176 CIViC                       | MITOMYCIN                                                  | MITOMYCIN                     | MITOMYCIN                 | chembl:CHEMBL105     | 2.12  |
| FANCD2   | 2177 DTC                         | DOXORUBIN                                                  | DOXORUBICIN HYDROCHLORIDE     | DOXORUBICIN HYDROCHLORIDE | chembl:CHEMBL359744  | 3.74  |

|         |                         |                             |                                                    |                               |                      |                      |
|---------|-------------------------|-----------------------------|----------------------------------------------------|-------------------------------|----------------------|----------------------|
| FAP     | 2191 TTD                | RG7461                      | RG7461                                             |                               |                      |                      |
| FARP2   | 9855 PharmGKB           | methylphenidmethylphenidate |                                                    | METHYLPHENIDATE               | chembl:CHEMBL796     | 2.83                 |
| FAS     | 355 NCI                 | MPA                         | MPA                                                | PROGESTERONE                  | chembl:CHEMBL103     | 0.09                 |
| FASLG   | 356 NCI                 | ANGIOTENS                   | ANGIOTENSIN CONVERTING ENZYME INHIBITOR            |                               |                      |                      |
| FASN    | 2194 DTC                | BI-87E7                     | BI-87E7                                            | CHEMBL523200                  | chembl:CHEMBL523200  | 0.18                 |
| FBP1    | 2203 TdgClinicalTrial   | MB07803                     | MB07803                                            | MB-07803                      | chembl:CHEMBL4297400 | 63.65                |
| FBP2    | 8789 TdgClinicalTrial   | MB07803                     | MB07803                                            | MB-07803                      | chembl:CHEMBL4297400 | 31.83                |
| FBXL17  | 64839 PharmGKB          | hydrochlorot                | hydrochlorothiazide                                | HYDROCHLOROTHIAZIDE           | chembl:CHEMBL435     | 1.77                 |
| FBXL19  | 54620 PharmGKB          | Tumor necros                | Tumor necrosis factor alpha (TNF-alpha) inhibitors |                               |                      |                      |
| FBXW7   | 55294 JAX-CKB           | Docetaxel                   | Docetaxel                                          | DOCETAXEL                     | chembl:CHEMBL92      | 0.2                  |
| FCAR    | 2204 GuideToPharmac     | 363894127                   | BSAB (CD89-CD20)                                   |                               |                      |                      |
| FCER1A  | 2205 PharmGKB           | mizolastine                 | mizolastine                                        | MIZOLASTINE                   | chembl:CHEMBL94454   | 21.22                |
| FCER1G  | 2207 TdgClinicalTrial   | R112                        | R112                                               |                               |                      |                      |
| FCER2   | 2208 TTD                | Lumiliximab                 | Lumiliximab                                        | LUMILIXIMAB                   | chembl:CHEMBL2109151 | 254.61               |
| FCGR1A  | 2209 ChemblInteractions | CHEMBL21                    | (MDX-447)                                          | MDX-447                       | chembl:CHEMBL2109391 | 31.83                |
| FCGR1CP | 100132417 NCI           | IFN                         | IFN                                                |                               |                      |                      |
| FCGR2A  | 2212 PharmGKB           | infliximab                  | infliximab                                         | INFLIXIMAB                    | chembl:CHEMBL1201581 | 2.27                 |
| FCGR2B  | 2213 NCI                | IL-2                        | IL-2                                               | ALDESLEUKIN                   | wikidata:Q20801763   | 1.63                 |
| FCGR3A  | 2214 NCI                | PROTEASE                    | PROTEASE INHIBITORS                                |                               |                      |                      |
| FCGR3B  | 2215 NCI                | PREDNISOL                   | PREDNISOLONE                                       | PREDNISOLONE                  | chembl:CHEMBL131     | 0.26                 |
| FCGRT   | 2217 GuideToPharmac     | 374883846                   | DX-2507                                            |                               |                      |                      |
| FCN2    | 2220 PharmGKB           | duloxetine                  | duloxetine                                         | DULOXETINE                    | chembl:CHEMBL1175    | 6.37                 |
| FDFT1   | 2222 ChemblInteractio   | inhibitor                   | CHEMBL43                                           | LAPAQUISTAT ACETATE           | LAPAQUISTAT ACETATE  | chembl:CHEMBL435224  |
| FDPS    | 2224 TEND               | IBANDRON                    | IBANDRONATE                                        | IBANDRONIC ACID               | chembl:CHEMBL997     | 15.91                |
| FECH    | 2235 TTD                | Methyl aminc                | Methyl aminolevulinate                             |                               |                      |                      |
| FEN1    | 2237 DTC                | NSC-106547                  | NSC-106547                                         | CHEMBL223575                  | chembl:CHEMBL223575  | 0.08                 |
| FER     | 2241 GuideToPharmac     | inhibitor                   | 328083505                                          | RO3280                        |                      |                      |
| FES     | 2242 GuideToPharmac     | inhibitor                   | 249565819                                          | COMPOUND 25B [PMID: 22564207] |                      |                      |
| FFAR1   | 2864 GuideToPharmac     | agonist                     | 178100391                                          | COMPOUND B [PMID:18477808]    |                      |                      |
| FFAR2   | 2867 GuideToPharmac     | antagonist                  | 252166627                                          | GLPG0974                      | GLPG-0974            | chembl:CHEMBL3353541 |
| FFAR3   | 2865 GuideToPharmac     | agonist                     | 135651494                                          | ISOBUTYRIC ACID               |                      |                      |
| FFAR4   | 338557 GuideToPharmac   | agonist                     | 252166628                                          | COMPOUND A [PMID 24997608]    |                      |                      |
| FGA     | 2243 TdgClinicalTrial   | RETEPLASER                  | RETEPLASE                                          | RETEPLASE                     | chembl:CHEMBL2107885 | 15.91                |
| FGB     | 2244 ChemblInteractio   | inhibitor                   | CHEMBL12                                           | (FIBRINOLYSIN, HUMAN)         | FIBRINOLYSIN, HUMAN  | chembl:CHEMBL1201505 |
| FGD4    | 121512 PharmGKB         | paclitaxel                  | paclitaxel                                         | PACLITAXEL                    | chembl:CHEMBL428647  | 1.31                 |
| FGF1    | 2246 TEND               | PENTOSAN                    | PENTOSAN POLYSULFATE                               |                               |                      |                      |
| FGF18   | 8817 TTD                | AS-902330                   | AS-902330                                          | SPRIFERMIN                    | chembl:CHEMBL2108302 | 63.65                |
| FGF19   | 9965 CIViC              | FISOGATINI                  | FISOGATINIB                                        |                               |                      |                      |
| FGF2    | 2247 NCI                | REBAMIPID                   | REBAMIPIDE                                         | REBAMIPIDE                    | chembl:CHEMBL1697771 | 2.02                 |
| FGF21   | 26291 TTD               | PF-05231023                 | PF-05231023                                        |                               |                      |                      |
| FGF22   | 27006 DTC               | SB-204741                   | SB-204741                                          | CHEMBL323356                  | chembl:CHEMBL323356  | 0.91                 |
| FGF23   | 8074 TTD                | Burosumab                   | Burosumab                                          | BUROSUMAB                     | chembl:CHEMBL3707326 | 254.61               |

|          |                         |               |                                  |                   |                      |
|----------|-------------------------|---------------|----------------------------------|-------------------|----------------------|
| FGF3     | 2248 CIViC              | SORAFENIB     | SORAFENIB                        | chembl:CHEMBL1336 | 1.53                 |
| FGF4     | 2249 TTD                | Alferminoger  | Alferminogene tadenovec          |                   |                      |
| FGF6     | 2251 NCI                | BUPIVACAIB    | BUPIVACAINE                      | chembl:CHEMBL1098 | 10.61                |
| FGF7     | 2252 TTD                | Keratinocyte  | Keratinocyte growth factor (KGF) |                   |                      |
| FGFR1    | 2260 TTD                | NGM313        | NGM313                           |                   |                      |
| FGFR1OP2 | 26127 PharmGKB          | brivanib      | brivanib                         | BRIVANIB          | chembl:CHEMBL377300  |
| FGFR2    | 2263 JAX-CKB            | AZ6089        | AZ6089                           |                   | 11.57                |
| FGFR3    | 2261 GuideToPharmac     | 384403666     | TAK-632                          |                   |                      |
| FGFR3P1  | 100462812 PharmGKB      | brivanib      | brivanib                         | BRIVANIB          | chembl:CHEMBL377300  |
| FGFR4    | 2264 GuideToPharmac     | 354702260     | DEBIO1347                        | DEBIO-1347        | wikidata:Q27285013   |
| FGFRL1   | 53834 PharmGKB          | brivanib      | brivanib                         | BRIVANIB          | chembl:CHEMBL377300  |
| FGG      | 2266 TdgClinicalTrial   | ALFIMEPRAA    | ALFIMEPRASE                      | ALFIMEPRASE       | chembl:CHEMBL2108893 |
| FGR      | 2268 ChemblInteractio   | CHEMBL40      | TG100-801                        | TG100-801         | chembl:CHEMBL403989  |
| FH       | 2271 NCI                | DIETHYLDI     | DIETHYLDITHIOCARBAM              | DITIOCARB         | chembl:CHEMBL961     |
| FHIT     | 2272 NCI                | TRICHOSTA     | TRICHOSTATIN A                   |                   | 18.19                |
| FHL2     | 2274 PharmGKB           | gemcitabine   | gemcitabine                      | GEMCITABINE       | chembl:CHEMBL888     |
| FIP1L1   | 81608 FDA               | Imatinib      | Imatinib                         | IMATINIB          | chembl:CHEMBL941     |
| FKBP1A   | 2280 ChemblInteractio   | CHEMBL35      | Olocrolimus                      | OLOCROLIMUS       | chembl:CHEMBL3545142 |
| FKBP4    | 2288 NCI                | IMMUNOSU      | IMMUNOSUPPRESSIVE                |                   |                      |
| FKBP5    | 2289 PharmGKB           | escitalopram  | escitalopram                     | ESCITALOPRAM      | chembl:CHEMBL1508    |
| FLCN     | 201163 CIViC            | SIROLIMUS     | SIROLIMUS                        | SIROLIMUS         | chembl:CHEMBL413     |
| FLG      | 2312 NCI                | PROPIONIB.    | PROPIONIBACTERIUM ACNES          |                   |                      |
| FLI1     | 2313 OncoKB             | TK216         | TK216                            |                   |                      |
| FLNA     | 2316 TTD                | PTI-125       | PTI-125                          |                   |                      |
| FLT1     | 2321 MyCancerGenom      | VANDETAN      | VANDETANIB                       | VANDETANIB        | chembl:CHEMBL24828   |
| FLT3     | 2322 GuideToPharmac     | 178102285     | LINIFANIB                        | LINIFANIB         | chembl:CHEMBL223360  |
| FLT4     | 2324 ClarityFoundation  | CEDIRANIB     | CEDIRANIB                        | CEDIRANIB         | chembl:CHEMBL491473  |
| FMO1     | 2326 PharmGKB           | tamoxifen     | tamoxifen                        | TAMOXIFEN         | chembl:CHEMBL83      |
| FMO3     | 2328 PharmGKB           | tacrolimus    | tacrolimus                       | TACROLIMUS        | chembl:CHEMBL269732  |
| FMO5     | 2330 PharmGKB           | metformin     | metformin                        | METFORMIN         | chembl:CHEMBL1431    |
| FN1      | 2335 ChemblInteractions | CHEMBL21      | L19IL2                           | L19IL2            | chembl:CHEMBL2109608 |
| FNTA     | 2339 ChemblInteractio   | CHEMBL29      | LONAFARNIB                       | LONAFARNIB        | chembl:CHEMBL298734  |
| FNTB     | 2342 PharmGKB           | lonafarnib    | lonafarnib                       | LONAFARNIB        | chembl:CHEMBL298734  |
| FOLH1    | 2346 NCI                | IMMUNOTC      | IMMUNOTOXIN                      |                   |                      |
| FOLR1    | 2348 TdgClinicalTrial   | FARLETUZU     | FARLETUZUMAB                     | FARLETUZUMAB      | chembl:CHEMBL1743016 |
| FOLR2    | 2350 DTC                | FOLIC ACID    | FOLIC ACID                       | FOLIC ACID        | chembl:CHEMBL1622    |
| FOLR3    | 2352 PharmGKB           | pemetrexed    | pemetrexed                       | PEMETREXED        | chembl:CHEMBL225072  |
| FOS      | 2353 NCI                | SAPONIN       | SAPONIN                          |                   | 9.09                 |
| FOSL1    | 8061 NCI                | TPA           | TPA                              | ALTEPLASE         | chembl:CHEMBL1201593 |
| FOXC2    | 2303 CIViC              | OXALIPLATO    | OXALIPLATIN                      | OXALIPLATIN       | chembl:CHEMBL414804  |
| FOXF2    | 2295 PharmGKB           | Antithyroid P | Antithyroid Preparations         |                   |                      |
| FOXL2    | 668 JAX-CKB             | N/A           | N/A                              |                   |                      |

|        |                                  |                                                |              |                  |                      |       |
|--------|----------------------------------|------------------------------------------------|--------------|------------------|----------------------|-------|
| FOXO1  | 2308 PharmGKB                    | fluorouracil                                   | fluorouracil | FLUOROURACIL     | chembl:CHEMBL185     | 0.2   |
| FOXO3  | 2309 DTC                         | RESVERATRIRESVERATROL                          | RESVERATROL  | RESVERATROL      | chembl:CHEMBL165     | 1.33  |
| FOXP3  | 50943 PharmGKB                   | methotrexate                                   | methotrexate | METHOTREXATE     | chembl:CHEMBL34259   | 0.39  |
| FPGS   | 2356 NCI                         | 5-FU                                           | 5-FU         | FLUOROURACIL     | chembl:CHEMBL185     | 0.4   |
| FPR1   | 2357 GuideToPharmac antagonist   | 135652599 T-BOC-FLFLF                          |              |                  |                      |       |
| FPR2   | 2358 GuideToPharmac antagonist   | 178102883 COMPOUND 1754-31 [PMID: 23788657]    |              |                  |                      |       |
| FPR3   | 2359 GuideToPharmac agonist      | 135652158 FMET-MET-TYR-ALA-LEU-PHE             |              |                  |                      |       |
| FRK    | 2444 DTC                         | TAMATINIETAMATINIB                             | R-406        |                  | chembl:CHEMBL475251  | 0.03  |
| FSCN1  | 6624 TTD                         | NP-G2-044 NP-G2-044                            | NP-G2-044    |                  | chembl:CHEMBL4297473 | 63.65 |
| FSHB   | 2488 TTD                         | Follicle stimuFollicle stimulating hormone     |              |                  |                      |       |
| FSHR   | 2492 TEND                        | MENOTROPENOTROPINS                             | MENOTROPINS  |                  | chembl:CHEMBL2108427 | 79.56 |
| FSIP1  | 161835 PharmGKB                  | aspirin                                        | aspirin      | ASPIRIN          | chembl:CHEMBL25      | 0.87  |
| FST    | 10468 NCI                        | ANTI-ANDRANTI-ANDROGEN                         |              |                  |                      |       |
| FTH1   | 2495 TTD                         | Ferritarg P Ferritarg P                        |              |                  |                      |       |
| FTO    | 79068 PharmGKB                   | interferon alf:interferon alfa-2b, recombinant |              |                  |                      |       |
| FURIN  | 5045 GuideToPharmac inhibitor    | 252166802 MI-1148                              |              |                  |                      |       |
| FUS    | 2521 NCI                         | ATRA                                           | ATRA         | TRETINOIN        | chembl:CHEMBL38      | 3.86  |
| FUT2   | 2524 PharmGKB                    | ethanol                                        | ethanol      | ALCOHOL          | chembl:CHEMBL545     | 1.48  |
| FUT3   | 2525 TTD                         | Rebmab-100 Rebma-100                           |              |                  |                      |       |
| FUT4   | 2526 TTD                         | 99mTc-fanoc99mTc-fanolesomab                   |              |                  |                      |       |
| FXN    | 2395 NCI                         | CISPLATIN                                      | CISPLATIN    | CISPLATIN        | chembl:CHEMBL11359   | 0.44  |
| FXR2   | 9513 PharmGKB                    | methylphenidmethylphenidate                    |              | METHYLPHENIDATE  | chembl:CHEMBL796     | 2.83  |
| FXYD2  | 486 ChemblInteractio inhibitor   | CHEMBL17: DIGOXIN                              |              | DIGOXIN          | chembl:CHEMBL1751    | 0.37  |
| FYN    | 2534 ChemblInteractio inhibitor  | CHEMBL40: TG100-801                            |              | TG100-801        | chembl:CHEMBL403989  | 0.11  |
| FZD1   | 8321 DTC                         | GNF-PF-341 GNF-PF-3411                         |              | CHEMBL593726     | chembl:CHEMBL593726  | 31.83 |
| FZD2   | 2535 GuideToPharmac antibody     | 381118907 VANTICTUMAB                          |              | VANTICTUMAB      | chembl:CHEMBL2364652 | 18.19 |
| FZD4   | 8322 GuideToPharmac allosteric   | 381745002 FZM1.8                               |              |                  |                      |       |
| FZD5   | 7855 GuideToPharmac antibody     | 381118907 VANTICTUMAB                          |              | VANTICTUMAB      | chembl:CHEMBL2364652 | 18.19 |
| FZD6   | 8323 GuideToPharmac agonist      | 135651914 WNT-3A                               |              |                  |                      |       |
| FZD7   | 8324 GuideToPharmac antagonist   | 381745004 SRI37892                             |              |                  |                      |       |
| FZD8   | 8325 GuideToPharmac allosteric   | 178102003 CARBAMAZEPINE                        |              | CARBAMAZEPINE    | chembl:CHEMBL108     | 0.45  |
| G6PD   | 2539 FDA                         | SulfamethoxeSulfamethoxazole                   |              | SULFAMETHOXAZOLE | chembl:CHEMBL443     | 0.18  |
| GAA    | 2548 DTC                         | CID 667285 CID 667285                          |              | CHEMBL267160     | chembl:CHEMBL267160  | 0.23  |
| GABBR1 | 2550 TdgClinicalTrial            | R-BACLOFER-BACLOFEN                            |              |                  |                      |       |
| GABBR2 | 9568 TdgClinicalTrial            | ARBACLOF.ARBACLOFEN                            |              | ARBACLOFEN       | chembl:CHEMBL301742  | 31.83 |
| GABPA  | 2551 NCI                         | QUERCETINQUERCETIN                             |              | QUERCETIN        | chembl:CHEMBL50      | 0.54  |
| GABRA1 | 2554 TdgClinicalTrial            | CLONAZEP.CLONAZEPAM                            |              | CLONAZEPAM       | chembl:CHEMBL452     | 0.23  |
| GABRA2 | 2555 ChemblInteractions          | CHEMBL40: FLUMAZENIL                           |              | FLUMAZENIL       | chembl:CHEMBL407     | 0.2   |
| GABRA3 | 2556 GuideToPharmac allosteric   | 178101144 TPA023                               |              | MK-0777          | chembl:CHEMBL200177  | 0.19  |
| GABRA4 | 2557 ChemblInteractio positive n | CHEMBL97(HALAZEPAM                             |              | HALAZEPAM        | chembl:CHEMBL970     | 0.04  |
| GABRA5 | 2558 ChemblInteractio positive n | CHEMBL45: CHLORDIAZEPOXIDE                     |              | CHLORDIAZEPOXIDE | chembl:CHEMBL451     | 0.11  |
| GABRA6 | 2559 GuideToPharmac allosteric   | 178100967 BRETZENIL                            |              | BRETZENIL        | chembl:CHEMBL366947  | 0.14  |

|         |                       |                                         |                                         |                      |       |
|---------|-----------------------|-----------------------------------------|-----------------------------------------|----------------------|-------|
| GABRB1  | 2560 TdgClinicalTrial | HALAZEPAM                               | HALAZEPAM                               | chembl:CHEMBL970     | 0.25  |
| GABRB2  | 2561 TdgClinicalTrial | CLOBAZAM                                | CLOBAZAM                                | chembl:CHEMBL70418   | 0.13  |
| GABRB3  | 2562 ChemblInteracti  | CHEMBL209                               | CHEMBL209                               | chembl:CHEMBL2096631 | 0.06  |
| GABRD   | 2563 TEND             | DIAZEPAM                                | DIAZEPAM                                | chembl:CHEMBL12      | 0.17  |
| GABRE   | 2564 TdgClinicalTrial | CHLORDIAZEPOXIDE                        | CHLORDIAZEPOXIDE                        | chembl:CHEMBL451     | 0.15  |
| GABRG1  | 2565 TdgClinicalTrial | ALPRAZOLAM                              | ALPRAZOLAM                              | chembl:CHEMBL661     | 0.1   |
| GABRG2  | 2566 ChemblInteracti  | CHEMBL152                               | CHEMBL152                               | chembl:CHEMBL1521    | 0.24  |
| GABRG3  | 2567 TTD              | Metharbital                             | METHARBITAL                             | chembl:CHEMBL450     | 0.09  |
| GABRP   | 2568 ChemblInteracti  | CHEMBL12                                | CHEMBL12                                |                      |       |
| GABRQ   | 55879 ChemblInteracti | CHEMBL52                                | CHEMBL52                                | chembl:CHEMBL526     | 0.04  |
| GABRR1  | 2569 TdgClinicalTrial | TRIAZOLAM                               | TRIAZOLAM                               | chembl:CHEMBL646     | 0.28  |
| GABRR2  | 2570 TdgClinicalTrial | HALAZEPAM                               | HALAZEPAM                               | chembl:CHEMBL970     | 0.44  |
| GABRR3  | 200959 TEND           | HALAZEPAM                               | HALAZEPAM                               | chembl:CHEMBL970     | 0.44  |
| GAD1    | 2571 GuideToPharmac   | 178101950                               | 178101950                               |                      |       |
| GAD2    | 2572 TTD              | Diamyd                                  | Diamyd                                  |                      |       |
| GADD45A | 1647 NCI              | DOXORUBICIN                             | DOXORUBICIN                             | chembl:CHEMBL53463   | 0.27  |
| GADD45G | 10912 NCI             | ANDROGEN                                | ANDROGEN                                |                      |       |
| GAK     | 2580 DTC              | SB-202190                               | SB-202190                               | chembl:CHEMBL278041  | 1.21  |
| GAL     | 51083 PharmGKB        | Selective serotonin reuptake inhibitors | Selective serotonin reuptake inhibitors |                      |       |
| GALC    | 2581 NCI              | BUSULFAN                                | BUSULFAN                                | chembl:CHEMBL820     | 11.23 |
| GALK1   | 2584 DTC              | GNF-PF-67                               | CHEMBL578512                            | chembl:CHEMBL578512  | 0.18  |
| GALNS   | 2588 TTD              | BMN-110                                 | ELOSULFASE ALFA                         | chembl:CHEMBL2108676 | 63.65 |
| GALNT14 | 79623 PharmGKB        | fluorouracil                            | FLUOROURACIL                            | chembl:CHEMBL185     | 0.45  |
| GALNT17 | 64409 PharmGKB        | montelukast                             | MONTELUKAST                             | chembl:CHEMBL787     | 7.07  |
| GALNT18 | 374378 PharmGKB       | tocilizumab                             | TOCILIZUMAB                             | chembl:CHEMBL1237022 | 15.91 |
| GALNT2  | 2590 PharmGKB         | atenolol                                | ATENOLOL                                | chembl:CHEMBL24      | 1.87  |
| GALP    | 85569 NCI             | THYROID-STIMULATING HORMONE             | THYROID-STIMULATING HORMONE             |                      |       |
| GALR1   | 2587 GuideToPharmac   | 178102728                               | CHEMBL506495                            | chembl:CHEMBL506495  | 4.55  |
| GALR2   | 8811 GuideToPharmac   | 178102729                               |                                         |                      |       |
| GALR3   | 8484 DTC              | METHACHOLINE CHLORIDE                   | METHACHOLINE CHLORIDE                   | chembl:CHEMBL1200764 | 1.93  |
| GALT    | 2592 TTD              | HyperAcute vaccine                      | HyperAcute vaccine                      |                      |       |
| GANAB   | 23193 DTC             | MIGLUSTAT                               | MIGLUSTAT                               | chembl:CHEMBL1029    | 63.65 |
| GAPDH   | 2597 DTC              | PURPUROGALLIN                           | PURPUROGALLIN                           | chembl:CHEMBL66953   | 0.12  |
| GAPVD1  | 26130 PharmGKB        | interferon beta-1a                      | interferon beta-1a                      |                      |       |
| GART    | 2618 ChemblInteracti  | CHEMBL12                                | CHEMBL12                                |                      |       |
| GAS6    | 2621 NCI              | WARFARIN                                | WARFARIN                                | chembl:CHEMBL1464    | 1.77  |
| GAST    | 2520 TTD              | G17DT                                   | G17DT                                   |                      |       |
| GATA1   | 2623 JAX-CKB          | Daunorubicin                            | DAUNORUBICIN                            | chembl:CHEMBL178     | 0.99  |
| GATA2   | 2624 NCI              | 5-AZACYTIDINE                           | AZACITIDINE                             | chembl:CHEMBL1489    | 0.94  |
| GATA3   | 2625 PharmGKB         | mercaptopurine                          | MERCAPTOPYRINE                          | chembl:CHEMBL1425    | 0.27  |
| GATA4   | 2626 DTC              | NSC-85661                               | CHEMBL1684098                           | chembl:CHEMBL1684098 | 25.46 |
| GATM    | 2628 PharmGKB         | hmg coa reductase inhibitors            | hmg coa reductase inhibitors            |                      |       |

|       |                            |                                                    |                                  |                      |                      |
|-------|----------------------------|----------------------------------------------------|----------------------------------|----------------------|----------------------|
| GBA   | 2629 DTC                   | GNF-PF-408:GNF-PF-4085                             | CHEMBL528181                     | chembl:CHEMBL528181  | 0.3                  |
| GBP6  | 163351 PharmGKB            | Tumor necrosis factor alpha (TNF-alpha) inhibitors |                                  |                      |                      |
| GC    | 2638 ChEMBLInteraction     | inhibitor CHEMBL712                                | ANISINDIONE                      | chembl:CHEMBL712     | 1.52                 |
| GCG   | 2641 NCI                   | PC4                                                | PC4                              |                      |                      |
| GCGR  | 2642 TTD                   | Aromatic ring                                      | Aromatic ring compound 4         |                      |                      |
| GCH1  | 2643 TTD                   | ProSavin                                           | ProSavin                         |                      |                      |
| GCK   | 2645 TTD                   | HMS5552                                            | HMS5552                          | DORZAGLIATIN         | chembl:CHEMBL4297508 |
| GCKR  | 2646 PharmGKB              | ethanol                                            | ethanol                          | ALCOHOL              | chembl:CHEMBL545     |
| GCLC  | 2729 NCI                   | BSO                                                | BSO                              |                      |                      |
| GCLM  | 2730 NCI                   | PMSG                                               | PMSG                             |                      |                      |
| GDA   | 9615 DTC                   | NSC-7861                                           | NSC-7861                         | 7-METHYLBXANTHINE    | chembl:CHEMBL321248  |
| GDF15 | 9518 NCI                   | NSAIDS                                             | NSAIDS                           |                      |                      |
| GDF2  | 2658 TTD                   | ACE-041                                            | ACE-041                          | DALANTERCEPT         | chembl:CHEMBL2109662 |
| GDF5  | 8200 TTD                   | RhGDF-5                                            | RhGDF-5                          |                      |                      |
| GDNF  | 2668 TTD                   | Liatermin                                          | Liatermin                        | LIATERMIN            | chembl:CHEMBL2108380 |
| GEM   | 2669 TTD                   | Lirilumab                                          | Lirilumab                        | LIRILUMAB            | chembl:CHEMBL2109500 |
| GET1  | 7485 PharmGKB              | methylphenidate                                    | methylphenidate                  | METHYLPHENIDATE      | chembl:CHEMBL796     |
| GFAP  | 2670 NCI                   | IMMUNOTOXIN                                        | IMMUNOTOXIN                      |                      |                      |
| GFER  | 2671 DTC                   | TRIMEPRAZINE                                       | TRIMEPRAZINE TARTRATE            | chembl:CHEMBL1713082 | 0.49                 |
| GFRA1 | 2674 GuideToPharmacology   | 178101552 [125I]GDNF (RAT)                         |                                  |                      |                      |
| GFRA3 | 2676 TTD                   | Neublastin                                         | Neublastin                       |                      |                      |
| GFRAL | 389400 GuideToPharmacology | agonist 354702211                                  | GROWTH DIFFERENTIATION FACTOR 15 |                      |                      |
| GGCT  | 79017 GuideToPharmacology  | inhibitor 381744946                                | GGSTOP                           |                      |                      |
| GGCX  | 2677 TEND                  | PHYTONADIONE                                       | PHYTONADIONE                     | PHYTONADIONE         | chembl:CHEMBL1550    |
| GGH   | 8836 PharmGKB              | methotrexate                                       | methotrexate                     | METHOTREXATE         | chembl:CHEMBL34259   |
| GGPS1 | 9453 GuideToPharmacology   | inhibitor 135649698                                | COMPOUND 16 [PMID: 18800762]     |                      |                      |
| GGT1  | 2678 NCI                   | ANTIBIOTICS                                        | ANTIBIOTICS                      |                      |                      |
| GH1   | 2688 TTD                   | VRS-317                                            | VRS-317                          | SOMAVARATAN          | chembl:CHEMBL3707323 |
| GHR   | 2690 TTD                   | Syntropin                                          | Syntropin                        |                      |                      |
| GHRH  | 2691 NCI                   | MELATONIN                                          | MELATONIN                        | MELATONIN            | chembl:CHEMBL45      |
| GHRHR | 2692 TdgClinicalTrial      | DAC:GRF                                            | DAC:GRF                          |                      |                      |
| GHRL  | 51738 NCI                  | ROFECOXIB                                          | ROFECOXIB                        | ROFECOXIB            | chembl:CHEMBL122     |
| GHSR  | 2693 GuideToPharmacology   | antagonist 178102495                               | ABBOTT 14C                       |                      |                      |
| GIPR  | 2696 TTD                   | SAR438335                                          | SAR438335                        |                      |                      |
| GJA1  | 2697 NCI                   | BLEOMYCIN                                          | BLEOMYCIN                        | BLEOMYCIN            | chembl:CHEMBL403664  |
| GJA10 | 84694 GuideToPharmacology  | inhibitor 135652731                                | CA2+                             |                      |                      |
| GJA3  | 2700 GuideToPharmacology   | inhibitor 135652731                                | CA2+                             |                      |                      |
| GJA4  | 2701 GuideToPharmacology   | inhibitor 178100972                                | CARBENOXOLONE                    | CARBENOXOLONE        | chembl:CHEMBL499915  |
| GJA5  | 2702 GuideToPharmacology   | inhibitor 135652731                                | CA2+                             |                      |                      |
| GJA8  | 2703 GuideToPharmacology   | inhibitor 135650269                                | FLUFENAMIC ACID                  |                      |                      |
| GJA9  | 81025 GuideToPharmacology  | inhibitor 135652731                                | CA2+                             |                      |                      |
| GJB1  | 2705 GuideToPharmacology   | inhibitor 135652731                                | CA2+                             |                      |                      |

|        |           |                    |            |                                       |                  |                  |                      |  |       |
|--------|-----------|--------------------|------------|---------------------------------------|------------------|------------------|----------------------|--|-------|
| GJB2   | 2706      | GuideToPharmac     | inhibitor  | 135652731                             | CA2+             |                  |                      |  |       |
| GJB3   | 2707      | GuideToPharmac     | inhibitor  | 178101095                             | OCTANOL          | OCTANOL          | chembl:CHEMBL26215   |  | 1.52  |
| GJB4   | 127534    | GuideToPharmac     | inhibitor  | 135652731                             | CA2+             |                  |                      |  |       |
| GJB5   | 2709      | GuideToPharmac     | inhibitor  | 178101095                             | OCTANOL          | OCTANOL          | chembl:CHEMBL26215   |  | 1.52  |
| GJB6   | 10804     | GuideToPharmac     | inhibitor  | 178101095                             | OCTANOL          | OCTANOL          | chembl:CHEMBL26215   |  | 1.52  |
| GJB7   | 375519    | GuideToPharmac     | inhibitor  | 135652731                             | CA2+             |                  |                      |  |       |
| GJC1   | 10052     | GuideToPharmac     | inhibitor  | 135650269                             | FLUFENAMIC ACID  |                  |                      |  |       |
| GJC2   | 57165     | GuideToPharmac     | inhibitor  | 178101095                             | OCTANOL          | OCTANOL          | chembl:CHEMBL26215   |  | 1.52  |
| GJC3   | 349149    | GuideToPharmac     | inhibitor  | 178100972                             | CARBENOXOLONE    | CARBENOXOLONE    | chembl:CHEMBL499915  |  | 1.33  |
| GJD2   | 57369     | GuideToPharmac     | inhibitor  | 178101095                             | OCTANOL          | OCTANOL          | chembl:CHEMBL26215   |  | 1.52  |
| GJD3   | 125111    | GuideToPharmac     | inhibitor  | 135650269                             | FLUFENAMIC ACID  |                  |                      |  |       |
| GJD4   | 219770    | GuideToPharmac     | inhibitor  | 178101095                             | OCTANOL          | OCTANOL          | chembl:CHEMBL26215   |  | 1.52  |
| GJE1   | 100126572 | GuideToPharmac     | inhibitor  | 135650269                             | FLUFENAMIC ACID  |                  |                      |  |       |
| GLA    | 2717      | DTC                |            | PINDOLOL                              | PINDOLOL         | PINDOLOL         | chembl:CHEMBL500     |  | 0.88  |
| GLCCII | 113263    | PharmGKB           |            | nedocromil                            | nedocromil       | NEDOCROMIL       | chembl:CHEMBL746     |  | 15.91 |
| GLDC   | 2731      | PharmGKB           |            | escitalopram                          | escitalopram     | ESCITALOPRAM     | chembl:CHEMBL1508    |  | 3.54  |
| GLII   | 2735      | TTD                |            | Isoflavone de Isoflavone derivative 2 |                  |                  |                      |  |       |
| GLIPR1 | 11010     | TTD                |            | AdRTVP-1                              | AdRTVP-1         |                  |                      |  |       |
| GLO1   | 2739      | DTC                |            | 2-(4-METHC2-(4-METHOXYBENZAMII        | CHEMBL1701911    |                  | chembl:CHEMBL1701911 |  | 63.65 |
| GLP1R  | 2740      | GuideToPharmac     | antagonist | 135652151                             | EXENDIN-(9-39)   |                  |                      |  |       |
| GLP2R  | 9340      | TdgClinicalTrial   |            | ZP1848                                | ZP1848           | GLEPAGLUTIDE     | chembl:CHEMBL4297761 |  | 42.43 |
| GLRA1  | 2741      | GuideToPharmac     | antagonist | 135652718                             | STRYCHNINE       | STRYCHNINE       | chembl:CHEMBL227934  |  | 0.3   |
| GLRA2  | 2742      | GuideToPharmac     | allosteric | 135652747                             | ZN2+             |                  |                      |  |       |
| GLRA3  | 8001      | GuideToPharmac     | antagonist | 135651326                             | WIN55212-2       |                  |                      |  |       |
| GLRB   | 2743      | ChemblInteractions |            | CHEMBL12(SEVOFLURANE                  |                  | SEVOFLURANE      | chembl:CHEMBL1200694 |  | 0.14  |
| GLS    | 2744      | DTC                |            | CEFATRIZIN                            | CEFATRIZINE      | CEFATRIZINE      | chembl:CHEMBL1095284 |  | 0.94  |
| GM2A   | 2760      | TTD                |            | BIW-8962                              | BIW-8962         | BIW-8962         | chembl:CHEMBL2109426 |  | 63.65 |
| GMNN   | 51053     | DTC                |            | IDAZOXAN                              | IDAZOXAN         | IDAZOXAN         | chembl:CHEMBL10316   |  | 0.02  |
| GNA11  | 2767      | CIViC              |            | MEK INHIBIMEK INHIBITOR               | PD0325901        |                  |                      |  |       |
| GNA13  | 10672     | PharmGKB           |            | oxaliplatin                           | oxaliplatin      | OXALIPLATIN      | chembl:CHEMBL414804  |  | 3.44  |
| GNAQ   | 2776      | JAX-CKB            |            | Verteporfin                           | Verteporfin      | VERTEPORFIN      | chembl:CHEMBL2218885 |  | 4.9   |
| GNAS   | 2778      | DTC                |            | GARCINON                              | GARCINONE E      | GARCINONE E      | chembl:CHEMBL454580  |  | 0.18  |
| GNB3   | 2784      | PharmGKB           |            | Thiazides, pl                         | Thiazides, plain |                  |                      |  |       |
| GNE    | 10020     | TTD                |            | GNE Lipople                           | GNE Lipoplex     |                  |                      |  |       |
| GNL3   | 26354     | PharmGKB           |            | cyclophospha                          | cyclophosphamide | CYCLOPHOSPHAMIDE | chembl:CHEMBL88      |  | 0.27  |
| GNMT   | 27232     | PharmGKB           |            | l-methionine                          | l-methionine     | METHIONINE       | chembl:CHEMBL42336   |  | 12.73 |
| GNRH1  | 2796      | NCI                |            | DDS                                   | DDS              | DAPSONE          | chembl:CHEMBL1043    |  | 1.16  |
| GNRHR  | 2798      | TTD                |            | Elagolix sodi                         | Elagolix sodium  |                  |                      |  |       |
| GNRHR2 | 114814    | TdgClinicalTrial   |            | DEGARELIX                             | DEGARELIX        | DEGARELIX        | chembl:CHEMBL415606  |  | 3.98  |
| GP1BA  | 2811      | TTD                |            | ZK-001                                | ZK-001           |                  |                      |  |       |
| GP6    | 51206     | TdgClinicalTrial   |            | PR-15                                 | PR-15            |                  |                      |  |       |
| GPA33  | 10223     | TTD                |            | MGD007                                | MGD007           | MGD-007          | chembl:CHEMBL4298038 |  | 10.61 |

|         |        |                           |                            |                                    |                         |                             |
|---------|--------|---------------------------|----------------------------|------------------------------------|-------------------------|-----------------------------|
| GPBAR1  | 151306 | GuideToPharmacagonist     | 135651505                  | LITHOCHOLIC ACID                   |                         |                             |
| GPC3    | 2719   | TTD                       | GPC3                       | targetiiGPC3 targeting CAR-T cells |                         |                             |
| GPD2    | 2820   | ChemblInteractioinhibitor | CHEMBL17                   | (METFORMIN HYDROCHL                | METFORMIN HYDROCHLORIDE | chembl:CHEMBL1703 1.18      |
| GPRI1   | 2852   | GuideToPharmac antagonist | 178103094                  | G36                                |                         |                             |
| GPI     | 2821   | NCI                       | 6-AN                       | 6-AN                               |                         |                             |
| GPNMB   | 10457  | ChemblInteractions        | CHEMBL17                   | (GLEMBATUMUMAB VED                 | (GLEMBATUMUMAB VEDOTIN  | chembl:CHEMBL1743028 190.95 |
| GPR119  | 139760 | GuideToPharmacagonist     | 178102365                  | COMPOUND 8G [PMID: 21444206]       |                         |                             |
| GPR12   | 2835   | DTC                       | NEOCYCLONEOCYCLOCITRINOL B | NEOCYCLOCITRINOL B                 | chembl:CHEMBL497296     | 31.83                       |
| GPR132  | 29933  | GuideToPharmacagonist     | 178102204                  | 9-HYDROXYOCTADECADIENOIC ACID      |                         |                             |
| GPR139  | 124274 | TTD                       | TAK-041                    | TAK-041                            |                         |                             |
| GPR142  | 350383 | GuideToPharmacagonist     | 252827449                  | COMPOUND 33 [TODA ET AL., 2013]    |                         |                             |
| GPR143  | 4935   | GuideToPharmacagonist     | 178100545                  | LEVODOPA                           | LEVODOPA                | chembl:CHEMBL1009 1.72      |
| GPR15   | 2838   | GuideToPharmacagonist     | 404859015                  | GPR15L (71-81)                     |                         |                             |
| GPR17   | 2840   | GuideToPharmacagonist     | 178102163                  | ASN04885796                        |                         |                             |
| GPR174  | 84636  | GuideToPharmacagonist     | 178100887                  | LYSOPHOSPHATIDYLSERINE             |                         |                             |
| GPR18   | 2841   | GuideToPharmacagonist     | 135651444                  | ARACHIDONYLCYCLOPROPYLAMIDE        |                         |                             |
| GPR183  | 1880   | GuideToPharmacagonist     | 135651392                  | 25-HYDROXYCHOLESTER                | CHEMBL169046            | chembl:CHEMBL169046 21.22   |
| GPR19   | 2842   | GuideToPharmacagonist     | 336446959                  | ADROPIN                            |                         |                             |
| GPR3    | 2827   | GuideToPharmacagonist     | 135651563                  | SPHINGOSINE 1-PHOSPHATE            |                         |                             |
| GPR32   | 2854   | GuideToPharmacagonist     | 178100762                  | RESOLVIN D1                        |                         |                             |
| GPR34   | 2857   | GuideToPharmacagonist     | 178100887                  | LYSOPHOSPHATIDYLSERINE             |                         |                             |
| GPR35   | 2859   | GuideToPharmacagonist     | 178101541                  | FUROSEMIDE                         | FUROSEMIDE              | chembl:CHEMBL35 1.31        |
| GPR37   | 2861   | GuideToPharmacagonist     | 178102688                  | PROSAPTIDE                         |                         |                             |
| GPR37L1 | 9283   | GuideToPharmacagonist     | 178102688                  | PROSAPTIDE                         |                         |                             |
| GPR39   | 2863   | GuideToPharmacagonist     | 135652747                  | ZN2+                               |                         |                             |
| GPR4    | 2828   | GuideToPharmac antagonist | 381744889                  | GPR4 ANTAGONIST 3B                 |                         |                             |
| GPR52   | 9293   | GuideToPharmacagonist     | 252827497                  | COMPOUND 7A [PMID: 24884590]       |                         |                             |
| GPR55   | 9290   | DTC                       | BISACODYI                  | BISACODYL                          | BISACODYL               | chembl:CHEMBL942 0.94       |
| GPR63   | 81491  | GuideToPharmacagonist     | 178102157                  | DIOLEOYLPHOSPHATIDIC ACID          |                         |                             |
| GPR68   | 8111   | GuideToPharmacagonist     | 404859017                  | OSTN (115-133)                     |                         |                             |
| GPR75   | 10936  | GuideToPharmacagonist     | 135651690                  | CCL5                               |                         |                             |
| GPR83   | 10888  | PharmGKB                  | hydrochlorot               | hydrochlorothiazide                | HYDROCHLOROTHIAZIDE     | chembl:CHEMBL435 0.88       |
| GPR84   | 53831  | GuideToPharmacagonist     | 178102470                  | 6-N-OCTYLAMINOURACIL               |                         |                             |
| GPR87   | 53836  | GuideToPharmac antagonist | 135650457                  | KII6425                            |                         |                             |
| GPR88   | 54112  | GuideToPharmacagonist     | 375973219                  | RTI-13951-33                       |                         |                             |
| GPRC6A  | 222545 | GuideToPharmacagonist     | 135651510                  | L-SERINE                           | SERINE                  | chembl:CHEMBL11298 7.96     |
| GPT     | 2875   | NCI                       | PROTEASE                   | PROTEASE INHIBITOR                 |                         |                             |
| GPX1    | 2876   | NCI                       | GP-120                     | GP-120                             |                         |                             |
| GPX5    | 2880   | PharmGKB                  | carboplatin                | carboplatin                        | CARBOPLATIN             | chembl:CHEMBL1351 0.54      |
| GRAMD1B | 57476  | PharmGKB                  | lithium                    | lithium                            | LITHIUM                 | chembl:CHEMBL2146126 2.77   |
| GRB14   | 2888   | NCI                       | INSULIN                    | INSULIN                            | INSULIN                 | chembl:CHEMBL1201631 2.5    |
| GRB2    | 2885   | TdgClinicalTrial          | LIPOSOMA                   | LIPOSOMAL                          | GRB-2                   |                             |

|        |                          |             |             |                                                |                      |       |
|--------|--------------------------|-------------|-------------|------------------------------------------------|----------------------|-------|
| GREM2  | 64388 PharmGKB           | allopurinol | allopurinol | ALLOPURINOL                                    | chembl:CHEMBL1467    | 4.39  |
| GRIA1  | 2890 ChEMBLInteraction   | antagonist  | CHEMBL115   | ZONAMPANEL                                     | chembl:CHEMBL119625  | 0.59  |
| GRIA2  | 2891 GuideToPharmac      | allosteric  | 178100987   | CYCLOTHIAZIDE                                  | chembl:CHEMBL61593   | 0.24  |
| GRIA3  | 2892 GuideToPharmac      | agonist     | 178100893   | (S)-5-FLUOROWILLARDIINE                        |                      |       |
| GRIA4  | 2893 TdgClinicalTrial    |             |             | PERAMPANPERAMPANEL                             | chembl:CHEMBL1214124 | 2.51  |
| GRID2  | 2895 PharmGKB            | risperidone | risperidone | RISPERIDONE                                    | chembl:CHEMBL85      | 1.99  |
| GRIK1  | 2897 TEND                |             |             | TOPIRAMA`TOPIRAMATE                            | chembl:CHEMBL220492  | 3.26  |
| GRIK2  | 2898 TdgClinicalTrial    |             |             | TALBUTAL TALBUTAL                              | chembl:CHEMBL1200802 | 0.85  |
| GRIK3  | 2899 TdgClinicalTrial    |             |             | TEZAMPANTEZAMPANEL                             | chembl:CHEMBL14935   | 3.54  |
| GRIK4  | 2900 PharmGKB            | haloperidol | haloperidol | HALOPERIDOL                                    | chembl:CHEMBL54      | 0.36  |
| GRIK5  | 2901 GuideToPharmac      | agonist     | 178100898   | [3H]SYM2081                                    |                      |       |
| GRIN1  | 2902 DTC                 |             |             | DIZOCILPINDIZOCILPINE                          | chembl:CHEMBL284237  | 0.49  |
| GRIN2A | 2903 ChEMBLInteraction   | positive n  | CHEMBL12    | NEBOGLAMINE                                    | chembl:CHEMBL1255840 | 0.26  |
| GRIN2B | 2904 GuideToPharmac      | blocker     | 178101077   | N1-DANSYL-SPERMINE                             |                      |       |
| GRIN2C | 2905 GuideToPharmac      | antagonist  | 178100976   | SELFOTEL                                       | chembl:CHEMBL39664   | 0.47  |
| GRIN2D | 2906 GuideToPharmac      | agonist     | 178100907   | [3H]GLYCINE                                    |                      |       |
| GRIN3A | 116443 TdgClinicalTrial  |             |             | LATREPIRDLATREPIRDINE                          | chembl:CHEMBL589390  | 0.3   |
| GRIN3B | 116444 ChEMBLInteraction | antagonist  | CHEMBL37    | Indantadol                                     | chembl:CHEMBL3707400 | 0.59  |
| GRK1   | 6011 GuideToPharmac      | inhibitor   | 249565822   | BALANOL                                        | chembl:CHEMBL60254   | 4.9   |
| GRK2   | 156 TTD                  |             |             | US9493490, US9493490, L                        |                      |       |
| GRK3   | 157 GuideToPharmac       | inhibitor   | 252166647   | COMPOUND 101 [PMID: 21596927]                  |                      |       |
| GRK4   | 2868 GuideToPharmac      | inhibitor   | 249565822   | BALANOL                                        | chembl:CHEMBL60254   | 1.22  |
| GRK5   | 2869 DTC                 |             |             | JNJ-7706621 JNJ-7706621                        | chembl:CHEMBL191003  | 0.11  |
| GRK6   | 2870 GuideToPharmac      | inhibitor   | 249565822   | BALANOL                                        | chembl:CHEMBL60254   | 4.9   |
| GRK7   | 131890 GuideToPharmac    | inhibitor   | 249565822   | BALANOL                                        | chembl:CHEMBL60254   | 4.9   |
| GRM1   | 2911 NCI                 |             |             | DHPG DHPG                                      |                      |       |
| GRM2   | 2912 GuideToPharmac      | allosteric  | 178102845   | COMPOUND 4 [PMID: 21105727]                    |                      |       |
| GRM3   | 2913 GuideToPharmac      | agonist     | 135650556   | LY379268                                       |                      |       |
| GRM4   | 2914 DTC                 |             |             | N-(3,4-DIMEN-(3,4-DIMETHOXYPHEN`CHEMBL572346   | chembl:CHEMBL572346  | 3.18  |
| GRM5   | 2915 TTD                 |             |             | Pyrazolopyrir Pyrazolopyrimidine derivative 2  |                      |       |
| GRM6   | 2916 GuideToPharmac      | antagonist  | 135651172   | [3H]LY341495                                   |                      |       |
| GRM7   | 2917 GuideToPharmac      | allosteric  | 252166746   | XAP044                                         |                      |       |
| GRM8   | 2918 GuideToPharmac      | agonist     | 135650554   | EGLUMEGAD                                      | chembl:CHEMBL2106523 | 15.91 |
| GRP    | 2922 NCI                 |             |             | NIFEDIPINENIFEDIPINE                           | chembl:CHEMBL193     | 0.34  |
| GRPR   | 2925 GuideToPharmac      | antagonist  | 178102803   | [D-PHE6]BOMBESIN(6-13)PROPYLAMIDE              |                      |       |
| GSK3A  | 2931 TTD                 |             |             | Thiadiazolidi Thiadiazolidindione derivative 2 |                      |       |
| GSK3B  | 2932 TTD                 |             |             | PMID261616PMID26161698-Compound-18             |                      |       |
| GSR    | 2936 NCI                 |             |             | THYROXINITHYROXINE                             | chembl:CHEMBL42115   | 0.71  |
| GSTA1  | 2938 PharmGKB            | vincristine | vincristine | VINCRISTINE                                    | chembl:CHEMBL90555   | 0.37  |
| GSTM1  | 2944 PharmGKB            | doxorubicin | doxorubicin | DOXORUBICIN                                    | chembl:CHEMBL53463   | 0.06  |
| GSTM3  | 2947 PharmGKB            | olanzapine  | olanzapine  | OLANZAPINE                                     | chembl:CHEMBL715     | 1.87  |
| GSTO1  | 9446 GuideToPharmac      | inhibitor   | 405067312   | COMPOUND 25 [PMID: 32105470]                   |                      |       |

|         |                                           |                                             |                                             |                      |                      |       |
|---------|-------------------------------------------|---------------------------------------------|---------------------------------------------|----------------------|----------------------|-------|
| GSTP1   | 2950 NCI                                  | DNR                                         | DNR                                         |                      |                      |       |
| GSTT1   | 2952 NCI                                  | PACLITAXE                                   | PACLITAXEL                                  | PACLITAXEL           | chembl:CHEMBL428647  | 0.13  |
| GSTZ1   | 2954 PharmGKB                             | dichloroacetic acid                         | dichloroacetic acid                         |                      |                      |       |
| GTF2B   | 2959 NCI                                  | VITAMIN D                                   | VITAMIN D                                   |                      |                      |       |
| GUCA2A  | 2980 NCI                                  | SALT                                        | SALT                                        | VOLANESORSEN SODIUM  | chembl:CHEMBL3544989 | 3.54  |
| GUCA2B  | 2981 NCI                                  | SALT                                        | SALT                                        | VOLANESORSEN SODIUM  | chembl:CHEMBL3544989 | 21.22 |
| GUCY1A1 | 2982 ChemblInteraction activator          | CHEMBL73                                    | (NITROGLYCERIN)                             | NITROGLYCERIN        | chembl:CHEMBL730     | 1.06  |
| GUCY1A2 | 2977 ChemblInteraction activator          | CHEMBL12                                    | (NITRIC OXIDE)                              | NITRIC OXIDE         | chembl:CHEMBL1200689 | 1.52  |
| GUCY1B1 | 2983 ChemblInteraction positive regulator | CHEMBL21                                    | (RIOCIGUAT)                                 | RIOCIGUAT            | chembl:CHEMBL2107834 | 3.64  |
| GUCY1B2 | 2974 ChemblInteraction activator          | CHEMBL662                                   | (ISOSORBIDE DINITRATE)                      | ISOSORBIDE DINITRATE | chembl:CHEMBL6622    | 2.65  |
| GUCY2C  | 2984 GuideToPharmacology                  | 178101714                                   | LINACLOTIDE                                 | LINACLOTIDE          | chembl:CHEMBL3301675 | 79.56 |
| GUCY2D  | 3000 TTD                                  | FK-409                                      | FK-409                                      | CHEMBL173729         | chembl:CHEMBL173729  | 31.83 |
| GUSB    | 2990 TTD                                  | PerioPatch                                  | PerioPatch                                  |                      |                      |       |
| GYP A   | 2993 TdgClinicalTrial                     | WX-G250                                     | WX-G250                                     | GIRENTUXIMAB         | chembl:CHEMBL1743027 | 7.96  |
| GZMA    | 3001 NCI                                  | CYCLOSPORINE                                | CYCLOSPORINE                                | CYCLOSPORINE         | chembl:CHEMBL160     | 2.05  |
| GZMB    | 3002 DTC                                  | HEXACHLOROPHENE                             | HEXACHLOROPHENE                             | HEXACHLOROPHENE      | chembl:CHEMBL496     | 3.1   |
| H19     | 283120 PharmGKB                           | Platinum compounds                          | Platinum compounds                          |                      |                      |       |
| H2AW    | 92815 NCI                                 | TRICHOSTATIN A                              | TRICHOSTATIN A                              |                      |                      |       |
| H2AX    | 3014 NCI                                  | TEMOZOLOMIDE                                | TEMOZOLOMIDE                                | TEMOZOLOMIDE         | chembl:CHEMBL810     | 1.77  |
| H3-3A   | 3020 CIViC                                | AKT/ERK INHIBITOR                           | AKT/ERK INHIBITOR                           | ONC201               |                      |       |
| H3C2    | 8358 CIViC                                | AKT/ERK INHIBITOR                           | AKT/ERK INHIBITOR                           | ONC201               |                      |       |
| H4-16   | 121504 NCI                                | TRICHOSTATIN A                              | TRICHOSTATIN A                              |                      |                      |       |
| HAMP    | 57817 TTD                                 | NOX-H94                                     | NOX-H94                                     | LEXAPTEPID PEGOL     | chembl:CHEMBL4298061 | 63.65 |
| HAS3    | 3038 NCI                                  | HYDROCORTISONE                              | HYDROCORTISONE                              | HYDROCORTISONE       | chembl:CHEMBL389621  | 3.35  |
| HASPIN  | 83903 GuideToPharmacology                 | 252827442                                   | SGI-1776                                    | SGI-1776             | chembl:CHEMBL1952329 | 9.09  |
| HAVCR2  | 84868 TTD                                 | LY3321367                                   | LY3321367                                   | LY-3321367           | chembl:CHEMBL4298022 | 63.65 |
| HBA2    | 3040 ChemblInteraction negative regulator | CHEMBL185                                   | EFAPROXIRAL                                 | EFAPROXIRAL          | chembl:CHEMBL18901   | 31.83 |
| HBB     | 3043 DTC                                  | AZACITIDINE                                 | AZACITIDINE                                 | AZACITIDINE          | chembl:CHEMBL1489    | 0.07  |
| HBEGF   | 1839 PharmGKB                             | cetuximab                                   | cetuximab                                   | CETUXIMAB            | chembl:CHEMBL1201577 | 0.49  |
| HCAR1   | 27198 GuideToPharmacology                 | 135651506                                   | L-LACTIC ACID                               |                      |                      |       |
| HCAR2   | 338442 TdgClinicalTrial                   | NIACIN RECEPTOR AGONIST                     | NIACIN RECEPTOR AGONIST                     |                      |                      |       |
| HCAR3   | 8843 TTD                                  | ARI-3037                                    | MCARI-3037                                  | MO                   |                      |       |
| HCG22   | 285834 PharmGKB                           | triamcinolone                               | triamcinolone                               | TRIAMCINOLONE        | chembl:CHEMBL1451    | 2.77  |
| HCK     | 3055 NCI                                  | LIF                                         | LIF                                         |                      |                      |       |
| HCN1    | 348980 PharmGKB                           | o-desmethyl-tramadol                        | o-desmethyl-tramadol                        |                      |                      |       |
| HCN2    | 610 GuideToPharmacology                   | 135652734                                   | CS+                                         |                      |                      |       |
| HCN3    | 57657 GuideToPharmacology                 | 135650098                                   | CILOBRADINE                                 | CILOBRADINE          | chembl:CHEMBL1436376 | 4.24  |
| HCN4    | 10021 GuideToPharmacology                 | 135651356                                   | ZATEBRADINE                                 | ZATEBRADINE          | chembl:CHEMBL69679   | 3.18  |
| HCP5    | 10866 PharmGKB                            | gemcitabine                                 | gemcitabine                                 | GEMCITABINE          | chembl:CHEMBL888     | 0.52  |
| HCRTR1  | 3061 TTD                                  | 1,2-diamino cyclopentane-based derivative 1 | 1,2-diamino cyclopentane-based derivative 1 |                      |                      |       |
| HCRTR2  | 3062 GuideToPharmacology                  | 135650615                                   | SUVOREXANT                                  | SUVOREXANT           | chembl:CHEMBL1083659 | 13.26 |
| HDAC1   | 3065 GuideToPharmacology                  | 310264675                                   | CUDC-101                                    | CUDC-101             | chembl:CHEMBL598797  | 0.36  |

|          |                         |           |                                                      |                              |                   |                      |       |
|----------|-------------------------|-----------|------------------------------------------------------|------------------------------|-------------------|----------------------|-------|
| HDAC10   | 83933 DTC               |           | APICIDIN                                             | APICIDIN                     | APICIDIN          | chembl:CHEMBL430060  | 0.33  |
| HDAC11   | 79885 TTD               |           | PMID296713                                           | PMID29671355-Compound-44     |                   |                      |       |
| HDAC2    | 3066 DTC                |           | 2-ENE-VALI                                           | 2-ENE-VALPROATE              | CHEMBL117487      | chembl:CHEMBL117487  | 0.27  |
| HDAC3    | 8841 TALC               | inhibitor | CUDC-101                                             | CUDC-101                     | CUDC-101          | chembl:CHEMBL598797  | 0.43  |
| HDAC4    | 9759 TALC               | inhibitor | CUDC-101                                             | CUDC-101                     | CUDC-101          | chembl:CHEMBL598797  | 0.45  |
| HDAC5    | 10014 TdgClinicalTrial  |           | RESMINOSTAT                                          | RESMINOSTAT                  | RESMINOSTAT       | chembl:CHEMBL4296717 | 0.15  |
| HDAC6    | 10013 TTD               |           | PMID280924                                           | PMID28092474-Compound-32i    |                   |                      |       |
| HDAC7    | 51564 ChemblInteraction | inhibitor | CHEMBL23                                             | TACEDINALINE                 | TACEDINALINE      | chembl:CHEMBL235191  | 0.47  |
| HDAC8    | 55869 TTD               |           | PMID296713                                           | PMID29671355-Compound-67     |                   |                      |       |
| HDAC9    | 9734 TALC               | inhibitor | SB939                                                | SB939                        |                   |                      |       |
| HDC      | 3067 TdgClinicalTrial   |           | BF-DERM1                                             | BF-DERM1                     |                   |                      |       |
| HDGF     | 3068 NCI                |           | PROTEIN KIPROTEIN KINASE C INHIBITOR                 |                              |                   |                      |       |
| HEBP1    | 50865 TTD               |           | Pyrazino[2,1-Pyrazino[2,1-a]isoquinolin derivative 3 |                              |                   |                      |       |
| HERC2    | 8924 DoCM               |           | NERATINIB                                            | NERATINIB                    | NERATINIB         | chembl:CHEMBL180022  | 11.57 |
| HES1     | 3280 NCI                |           | ALL-TRANSALL-TRANS-RETINOIC ACID                     |                              |                   |                      |       |
| HEXA     | 3073 DTC                |           | N-ACETYLCN-ACETYLGUCOSAMINICHEMBL257158              |                              |                   | chembl:CHEMBL257158  | 6.37  |
| HEXB     | 3074 NCI                |           | AMINOGLY AMINOGLYCOSIDES                             |                              |                   |                      |       |
| HFE      | 3077 PharmGKB           |           | adalimumab                                           | adalimumab                   | ADALIMUMAB        | chembl:CHEMBL1201580 | 7.49  |
| HGF      | 3082 NCI                |           | STI571                                               | STI571                       | IMATINIB MESYLATE | chembl:CHEMBL1642    | 1.06  |
| HIF1A    | 3091 DTC                |           | SP-600125                                            | SP-600125                    | SP-600125         | chembl:CHEMBL1725279 | 0.01  |
| HIF1AN   | 55662 DTC               |           | L-4-THIOPR                                           | L-4-THIOPROLINE              | CHEMBL1800368     | chembl:CHEMBL1800368 | 21.22 |
| HINT1    | 3094 PharmGKB           |           | nicotine                                             | nicotine                     | NICOTINE          | chembl:CHEMBL3       | 2.6   |
| HIPK1    | 204851 GuideToPharmac   | inhibitor | 135652717                                            | STAUROSPORINE                | STAUROSPORINE     | chembl:CHEMBL388978  | 1.52  |
| HIPK2    | 28996 GuideToPharmac    | inhibitor | 249565808                                            | COMPOUND 1A [PMID: 24900749] |                   |                      |       |
| HIPK3    | 10114 GuideToPharmac    | inhibitor | 249565806                                            | SILMITASERTIB                | SILMITASERTIB     | chembl:CHEMBL1230165 | 10.61 |
| HIPK4    | 147746 DTC              |           | GEFITINIB                                            | GEFITINIB                    | GEFITINIB         | chembl:CHEMBL939     | 0.06  |
| HK1      | 3098 NCI                |           | ADENOVIR                                             | ADENOVIRUS VECTOR            |                   |                      |       |
| HK2      | 3099 TTD                |           | VDA-1102                                             | VDA-1102 topical ointment    |                   |                      |       |
| HKDC1    | 80201 DTC               |           | SJ000044511                                          | SJ000044511                  | CHEMBL592124      | chembl:CHEMBL592124  | 0.16  |
| HLA-A    | 3105 PharmGKB           |           | peginterferon                                        | peginterferon alfa-2b        |                   |                      |       |
| HLA-B    | 3106 FDA                |           | Pazopanib                                            | Pazopanib                    | PAZOPANIB         | chembl:CHEMBL477772  | 0.19  |
| HLA-C    | 3107 PharmGKB           |           | flucloxacillin                                       | flucloxacillin               | FLOXACILLIN       | chembl:CHEMBL222645  | 1.52  |
| HLA-DPA1 | 3113 PharmGKB           |           | peginterferon                                        | peginterferon alfa-2b        |                   |                      |       |
| HLA-DPB1 | 3115 PharmGKB           |           | clozapine                                            | clozapine                    | CLOZAPINE         | chembl:CHEMBL42      | 0.9   |
| HLA-DPB2 | 3116 PharmGKB           |           | aspirin                                              | aspirin                      | ASPIRIN           | chembl:CHEMBL25      | 0.87  |
| HLA-DQA1 | 3117 NCI                |           | LYMPHOKI                                             | LYMPHOKINES                  |                   |                      |       |
| HLA-DQB1 | 3119 PharmGKB           |           | ticlopidine                                          | ticlopidine                  | TICLOPIDINE       | chembl:CHEMBL833     | 0.82  |
| HLA-DRA  | 3122 PharmGKB           |           | amoxicillin                                          | amoxicillin                  | AMOXICILLIN       | chembl:CHEMBL1082    | 1.25  |
| HLA-DRB1 | 3123 PharmGKB           |           | flupirtine                                           | flupirtine                   | FLUPIRTINE        | chembl:CHEMBL255044  | 0.26  |
| HLA-DRB2 | 3124 ChemblInteraction  | modulator | CHEMBL21                                             | (PLOVAMER ACETATE            | PLOVAMER ACETATE  | chembl:CHEMBL2108712 | 63.65 |
| HLA-DRB3 | 3125 PharmGKB           |           | heparin                                              | heparin                      | HEPARIN           | chembl:CHEMBL1909300 | 1.46  |
| HLA-DRB4 | 3126 TdgClinicalTrial   |           | 1D09C3                                               | 1D09C3                       | 1D09C3            | chembl:CHEMBL2109518 | 21.22 |

|          |                                |                     |                                    |                     |                      |        |
|----------|--------------------------------|---------------------|------------------------------------|---------------------|----------------------|--------|
| HLA-DRB5 | 3127 PharmGKB                  | amoxicillin         | amoxicillin                        | AMOXICILLIN         | chembl:CHEMBL1082    | 1.87   |
| HLA-E    | 3133 PharmGKB                  | glucocorticoid      | glucocorticoids                    |                     |                      |        |
| HLA-G    | 3135 PharmGKB                  | hmg coa reductase   | hmg coa reductase inhibitors       |                     |                      |        |
| HMBS     | 3145 TTD                       | P-9808              | P-9808                             |                     |                      |        |
| HMGB1    | 3146 NCI                       | PREDNISOLONE        | PREDNISOLONE                       | PREDNISOLONE        | chembl:CHEMBL131     | 0.45   |
| HMGCR    | 3156 GuideToPharmacoinhibitor  | 135649749           | COMPOUND 41 [PMID: 17574411]       |                     |                      |        |
| HMGCS1   | 3157 GuideToPharmacoinhibitor  | 135651558           | (S)-3-HYDROXY-3-METHYLGLUTARYL-COA |                     |                      |        |
| HMGCS2   | 3158 PharmGKB                  | hydrochlorothiazide | hydrochlorothiazide                | HYDROCHLOROTHIAZIDE | chembl:CHEMBL435     | 1.77   |
| HMMR     | 3161 PharmGKB                  | epirubicin          | epirubicin                         | EPIRUBICIN          | chembl:CHEMBL417     | 0.53   |
| HMOX1    | 3162 NCI                       | ZNCL2               | ZNCL2                              |                     |                      |        |
| HMOX2    | 3163 TdgClinicalTrial          | STANNSOPORFIN       | STANNSOPORFIN                      | STANNSOPORFIN       | chembl:CHEMBL4297207 | 63.65  |
| HNF1A    | 6927 JAX-CKB                   | N/A                 | N/A                                |                     |                      |        |
| HNF1B    | 6928 PharmGKB                  | platinum            | platinum                           | PLATINUM            | chembl:CHEMBL1235478 | 4.55   |
| HNF4A    | 3172 NCI                       | UREA                | UREA                               | UREA                | chembl:CHEMBL985     | 0.94   |
| HNMT     | 3176 TTD                       | Amodiaquine         | Amodiaquine                        | AMODIAQUINE         | chembl:CHEMBL682     | 12.73  |
| HNRNPA1  | 3178 DTC                       | CAMPTOTHECIN        | CAMPTOTHECIN                       | CAMPTOTHECIN        | chembl:CHEMBL65      | 3.54   |
| HNRNPC   | 3183 DTC                       | DABIGATRAN          | DABIGATRAN                         | DABIGATRAN          | chembl:CHEMBL48361   | 14.14  |
| HNRNPH2  | 3188 PharmGKB                  | migalastat          | migalastat                         | MIGALASTAT          | chembl:CHEMBL110458  | 15.91  |
| HOMER1   | 9456 PharmGKB                  | levodopa            | levodopa                           | LEVODOPA            | chembl:CHEMBL1009    | 1.72   |
| HOTAIR   | 100124700 PharmGKB             | Platinum compounds  | Platinum compounds                 |                     |                      |        |
| HOXA9    | 3205 NCI                       | G-CSF               | G-CSF                              | FILGRASTIM          | chembl:CHEMBL1201567 | 11.57  |
| HOXB1    | 3211 NCI                       | BROMODEOXYURIDINE   | BROMODEOXYURIDINE                  |                     |                      |        |
| HOXD1    | 3231 NCI                       | RETINOIC ACID       | RETINOIC ACID                      |                     |                      |        |
| HP       | 3240 NCI                       | HEPATITIS B VACCINE | HEPATITIS B VACCINE                |                     |                      |        |
| HPD      | 3242 TEND                      | NITISINONE          | NITISINONE                         | NITISINONE          | chembl:CHEMBL1337    | 636.51 |
| HPGD     | 3248 DTC                       | SJ000019194         | SJ000019194                        | CHEMBL592106        | chembl:CHEMBL592106  | 0.09   |
| HPGDS    | 27306 TTD                      | Praziquantel        | Praziquantel                       | PRAZICQUANTEL       | chembl:CHEMBL976     | 31.83  |
| HPN      | 3249 TEND                      | BENTIROMIDE         | BENTIROMIDE                        | BENTIROMIDE         | chembl:CHEMBL1200368 | 190.95 |
| HPRT1    | 3251 NCI                       | NITROSOUREAS        | NITROSOUREAS                       |                     |                      |        |
| HPSE     | 10855 NCI                      | TGF                 | TGF                                |                     |                      |        |
| HR       | 55806 TTD                      | Levomequitazine     | Levomequitazine                    |                     |                      |        |
| HRAS     | 3265 JAX-CKB                   | Pz-1                | Pz-1                               |                     |                      |        |
| HRH1     | 3269 GuideToPharmacantagonist  | 135650208           | DOXEPIN                            | DOXEPIN             | chembl:CHEMBL1628227 | 0.34   |
| HRH2     | 3274 GuideToPharmacagonist     | 135651300           | UR-PG146                           |                     |                      |        |
| HRH3     | 11255 GuideToPharmacagonist    | 135650397           | N-METHYLHISTAMINE                  | N-METHYLHISTAMINE   | chembl:CHEMBL507     | 0.47   |
| HRH4     | 59340 GuideToPharmacantagonist | 178103918           | MK-0249                            | MK-0249             | chembl:CHEMBL476323  | 0.59   |
| HSD11B1  | 3290 GuideToPharmacoinhibitor  | 381118868           | BMS-823778                         | BMS-823778          | chembl:CHEMBL4297457 | 7.07   |
| HSD11B2  | 3291 TTD                       | RG-7234             | RG-7234                            |                     |                      |        |
| HSD17B10 | 3028 DTC                       | PYRENE              | PYRENE                             | PYRENE              | chembl:CHEMBL279564  | 0.15   |
| HSD17B2  | 3294 GuideToPharmacoinhibitor  | 385612198           | COMPOUND 24 [PMID: 31343176]       |                     |                      |        |
| HSD17B3  | 3293 DTC                       | CURCUMIN            | CURCUMIN                           | CURCUMIN            | chembl:CHEMBL116438  | 1.79   |
| HSD3B1   | 3283 TdgClinicalTrial          | TRILOSTANE          | TRILOSTANE                         | TRILOSTANE          | chembl:CHEMBL1200907 | 95.48  |

|           |                       |                 |                              |                          |                      |
|-----------|-----------------------|-----------------|------------------------------|--------------------------|----------------------|
| HSD3B2    | 3284 TEND             | TRILOSTAN       | TRILOSTANE                   | chembl:CHEMBL1200907     | 106.09               |
| HSD3B7    | 80270 PharmGKB        | cholic acid     | cholic acid                  |                          |                      |
| HSF1      | 3297 DTC              | QUERCETIN       | QUERCETIN                    | chembl:CHEMBL50          | 0.54                 |
| HSP90AA1  | 3320 DTC              | SJ000018300     | SJ000018300                  | chembl:CHEMBL590927      | 0.08                 |
| HSP90AA2P | 3324 MyCancerGenon    | AUY922          | AUY922                       |                          |                      |
| HSP90AB1  | 3326 DTC              | ZERANOL         | ZERANOL                      | chembl:CHEMBL450613      | 0.24                 |
| HSP90B1   | 7184 GuideToPharmac   | 381118828 GRP94 | INHIBITOR 54                 |                          |                      |
| HSP90B2P  | 7190 TTD              | Heat shock pi   | Heat shock protein vaccine   |                          |                      |
| HSPA1A    | 3303 PharmGKB         | carbamazepir    | carbamazepine                | CARBAMAZEPINE            | chembl:CHEMBL108     |
| HSPA1L    | 3305 PharmGKB         | carbamazepir    | carbamazepine                | CARBAMAZEPINE            | chembl:CHEMBL108     |
| HSPA4     | 3308 NCI              | UREA            | UREA                         | UREA                     | chembl:CHEMBL985     |
| HSPA5     | 3309 DTC              | STROBOPIN       | STROBOPININ                  | STROBOPININ              | chembl:CHEMBL1556958 |
| HSPA8     | 3312 DTC              | NSC-119910      | NSC-119910                   | CHEMBL487046             | chembl:CHEMBL487046  |
| HSPA9     | 3313 TTD              | MKT-077         | MKT-077                      | CHEMBL33859              | chembl:CHEMBL33859   |
| HSPB1     | 3315 NCI              | DIFFERENT       | DIFFERENTIATION AGENTS       |                          |                      |
| HSPB2     | 3316 NCI              | PS-341          | PS-341                       | BORTEZOMIB               | chembl:CHEMBL325041  |
| HSPB6     | 126393 TTD            | AZX-100         | AZX-100                      | AZX-100                  | chembl:CHEMBL4297902 |
| HSPD1     | 3329 NCI              | CETRORELIC      | CETRORELIX                   | CETRORELIX               | chembl:CHEMBL1200490 |
| HSPE1     | 3336 TTD              | XToll           | XToll                        |                          |                      |
| HSPG2     | 3339 PharmGKB         | antipsychotic   | antipsychotics               |                          |                      |
| HTR1A     | 3350 GuideToPharmac   | 135650536       | LYSERGIDE                    | LYSERGIDE                | chembl:CHEMBL263881  |
| HTR1B     | 3351 GuideToPharmac   | 135649706       | 2-METHYL-5-HT                |                          |                      |
| HTR1D     | 3352 ChemblInteractio | agonist         | CHEMBL20(ERGOTAMINE TARTRATE |                          |                      |
| HTR1E     | 3354 GuideToPharmac   | antagonist      | 135650278 FLUSPIRILENE       | FLUSPIRILENE             | chembl:CHEMBL46516   |
| HTR1F     | 3355 GuideToPharmac   | agonist         | 135651095 SUMATRIPTAN        | SUMATRIPTAN              | chembl:CHEMBL128     |
| HTR2A     | 3356 TTD              | ZOTEPINE        | ZOTEPINE                     | ZOTEPINE                 | chembl:CHEMBL285802  |
| HTR2B     | 3357 GuideToPharmac   | agonist         | 135650920 RO 60-0175         |                          |                      |
| HTR2C     | 3358 TTD              | PMID266098      | PMID2660982-Compound-83      |                          |                      |
| HTR3A     | 3359 ChemblInteractio | antagonist      | CHEMBL21(VORTIOXETINE HYDROB | VORTIOXETINE HYDROBROMII | chembl:CHEMBL2107387 |
| HTR3B     | 9177 PharmGKB         | paroxetine      | paroxetine                   | PAROXETINE               | chembl:CHEMBL490     |
| HTR3C     | 170572 TdgClinical    | Trial           | VI-0134                      | VI-0134                  |                      |
| HTR3D     | 200909 TdgClinical    | Trial           | PUMOSETR                     | PUMOSETRAG               | chembl:CHEMBL1643880 |
| HTR3E     | 285242 TdgClinical    | Trial           | GRANISETR                    | GRANISETRON              | chembl:CHEMBL289469  |
| HTR4      | 3360 TTD              | SB-207266A      | SB-207266A                   |                          |                      |
| HTR5A     | 3361 GuideToPharmac   | agonist         | 135651128 [3H]5-CT           |                          |                      |
| HTR6      | 3362 GuideToPharmac   | agonist         | 135651059 CAPESEEROD         | CAPESEEROD               | chembl:CHEMBL2027925 |
| HTR7      | 3363 GuideToPharmac   | antagonist      | 135652727 YOHIMBINE          | YOHIMBINE                | chembl:CHEMBL15245   |
| HTRA1     | 5654 PharmGKB         | bevacizumab     | bevacizumab                  | BEVACIZUMAB              | chembl:CHEMBL1201583 |
| HTT       | 3064 TTD              | CUDC-907        | CUDC-907                     | FIMEPINOSTAT             | chembl:CHEMBL3622533 |
| HUS1      | 3364 NCI              | CAMPTOTH        | CAMPTOTHECIN                 | CAMPTOTHECIN             | chembl:CHEMBL65      |
| HVCN1     | 84329 GuideToPharmac  | blocker         | 135652747 ZN2+               |                          |                      |
| HYAL2     | 8692 NCI              | EPINEPHRINE     | EPINEPHRINE                  | EPINEPHRINE              | chembl:CHEMBL679     |

|         |                               |                                                                            |              |                      |        |
|---------|-------------------------------|----------------------------------------------------------------------------|--------------|----------------------|--------|
| HYKK    | 123688 PharmGKB               | varenicline varenicline                                                    | VARENICLINE  | chembl:CHEMBL1396    | 9.09   |
| HYOU1   | 10525 DTC                     | DABIGATR/DABIGATRAN                                                        | DABIGATRAN   | chembl:CHEMBL48361   | 14.14  |
| IAPP    | 3375 DTC                      | CURCUMIN CURCUMIN                                                          | CURCUMIN     | chembl:CHEMBL116438  | 0.9    |
| IBSP    | 3381 NCI                      | DAIDZEIN DAIDZEIN                                                          | DAIDZEIN     | chembl:CHEMBL8145    | 2.77   |
| ICA1    | 3382 PharmGKB                 | tramadol tramadol                                                          | TRAMADOL     | chembl:CHEMBL1237044 | 7.07   |
| ICAM1   | 3383 TTD                      | BI-505 BI-505                                                              | BI-505       | chembl:CHEMBL2109482 | 19.1   |
| ICAM2   | 3384 NCI                      | IFN IFN                                                                    |              |                      |        |
| ICAM3   | 3385 NCI                      | CSA CSA                                                                    | CYCLOSPORINE | chembl:CHEMBL160     | 0.51   |
| ICMT    | 23463 DTC                     | SIMVASTATIN/SIMVASTATIN                                                    | SIMVASTATIN  | chembl:CHEMBL1064    | 1.18   |
| ICOS    | 29851 TTD                     | MEDI-570 MEDI-570                                                          | MEDI-570     | chembl:CHEMBL2109449 | 31.83  |
| ICOSLG  | 23308 TTD                     | AMG 557 AMG 557                                                            |              |                      |        |
| IDE     | 3416 DTC                      | CALMIDAZOL/CALMIDAZOLIUM CHLOR/CALMIDAZOLIUM CHLORIDE                      |              | chembl:CHEMBL1208858 | 0.64   |
| IDH1    | 3417 JAX-CKB                  | BPTES BPTES                                                                |              |                      |        |
| IDH2    | 3418 JAX-CKB                  | AG-881 AG-881                                                              |              |                      |        |
| IDH1    | 3422 GuideToPharmacoinhibitor | 135650699 NE21650                                                          |              |                      |        |
| IDO1    | 3620 TTD                      | Benzimidazole/Benzimidazole and imadazopyridine carboximidamide compound 1 |              |                      |        |
| IDO2    | 169355 TTD                    | 2,3-diamino-1,2,3-diamino-benzo[b]thiophene derivative 5                   |              |                      |        |
| IDS     | 3423 TTD                      | Recombinant Recombinant human iduronate-2-sulfatase                        |              |                      |        |
| IFI27   | 3429 NCI                      | TNF-ALPHA/TNF-ALPHA                                                        |              |                      |        |
| IFIT2   | 3433 NCI                      | IFN IFN                                                                    |              |                      |        |
| IFNA1   | 3439 NCI                      | POLYPHENOL/POLYPHENOL                                                      |              |                      |        |
| IFNA2   | 3440 TTD                      | Interferon alpha/Interferon alpha 2a                                       |              |                      |        |
| IFNA5   | 3442 TTD                      | NAHE-001 NAHE-001                                                          |              |                      |        |
| IFNAR1  | 3454 TdgClinicalTrial         | INTERFERON/INTERFERON ALFA-2A, RECOMBINANT                                 |              |                      |        |
| IFNAR2  | 3455 ChemblInteractionagonist | CHEMBL12(PEGINTERFERON ALFA-2)/PEGINTERFERON ALFA-2A                       |              | chembl:CHEMBL1201560 | 2.65   |
| IFNB1   | 3456 TTD                      | FP-1201 FP-1201                                                            |              |                      |        |
| IFNG    | 3458 NCI                      | CYCLOPHOSPHAMIDE/CYCLOPHOSPHAMIDE                                          |              | chembl:CHEMBL88      | 0.09   |
| IFNGR1  | 3459 NCI                      | INDOLE-3-CARBINOL/INDOLE-3-CARBINOL                                        |              | chembl:CHEMBL155625  | 10.61  |
| IFNGR2  | 3460 ChemblInteractionagonist | CHEMBL12(INTERFERON GAMA-1B)/INTERFERON GAMMA-1B                           |              | chembl:CHEMBL1201564 | 159.13 |
| IFNL1   | 282618 TTD                    | PEG-Interferon lambda (IL-29)/PEG-Interferon lambda (IL-29)                |              |                      |        |
| IFNL3   | 282617 PharmGKB               | boceprevir boceprevir                                                      | BOCEPREVIR   | chembl:CHEMBL218394  | 2.34   |
| IFNL4   | 101180976 PharmGKB            | peginterferon/peginterferon alfa-2a                                        |              |                      |        |
| IFNLR1  | 163702 TdgClinicalTrial       | PEG-INTERFERON/PEG-INTERFERON LAMBA                                        |              |                      |        |
| IFNR    | 3466 TTD                      | HDV-interferon/HDV-interferon                                              |              |                      |        |
| IFNW1   | 3467 TTD                      | ITCA-638 ITCA-638                                                          |              |                      |        |
| IGF1    | 3479 TTD                      | BI-836845 BI-836845                                                        | XENTUZUMAB   | chembl:CHEMBL4297850 | 15.91  |
| IGF1R   | 3480 TdgClinicalTrial         | OSI-906 OSI-906                                                            | LINSITINIB   | chembl:CHEMBL1091644 | 1.68   |
| IGF2    | 3481 TTD                      | Xentuzumab Xentuzumab                                                      | XENTUZUMAB   | chembl:CHEMBL4297850 | 2.27   |
| IGF2-AS | 51214 PharmGKB                | Platinum compounds/Platinum compounds                                      |              |                      |        |
| IGF2BP2 | 10644 PharmGKB                | repaglinide repaglinide                                                    | REPAGLINIDE  | chembl:CHEMBL1272    | 4.24   |
| IGF2R   | 3482 TTD                      | EP-128504 EP-128504                                                        |              |                      |        |
| IGFBP1  | 3484 NCI                      | ORAL CONTRACEPTIVE/ORAL CONTRACEPTIVE                                      |              |                      |        |

|         |                                 |              |                                                    |                             |                      |       |
|---------|---------------------------------|--------------|----------------------------------------------------|-----------------------------|----------------------|-------|
| IGFBP3  | 3486 PharmGKB                   | celecoxib    | celecoxib                                          | CELECOXIB                   | chembl:CHEMBL118     | 0.99  |
| IGFBP4  | 3487 NCI                        | PMSG         | PMSG                                               |                             |                      |       |
| IGFBP5  | 3488 NCI                        | TGFBETA1     | TGFBETA1                                           |                             |                      |       |
| IGFBP6  | 3489 NCI                        | ANTISERUM    | ANTISERUM                                          |                             |                      |       |
| IGH     | 3492 FDA                        | Venetoclax   | Venetoclax                                         | VENETOCLAX                  | chembl:CHEMBL3137309 | 4.55  |
| IGHE    | 3497 GuideToPharmacantibody     | 310264775    | LIGELIZUMAB                                        | LIGELIZUMAB                 | chembl:CHEMBL2109457 | 25.46 |
| IGHG1   | 3500 TdgClinicalTrial           | IGG1         | ANTIBIGG1 ANTIBODY                                 |                             |                      |       |
| IHH     | 3549 NCI                        | TGFBETA1     | TGFBETA1                                           |                             |                      |       |
| IKBKB   | 3551 TdgClinicalTrial           | MLN-0415     | MLN-0415                                           | MLN-0415                    | chembl:CHEMBL3545265 | 5.79  |
| IKBKE   | 9641 GuideToPharmacinhibitor    | 336446965    | COMPOUND II [PMID: 21329883]                       |                             |                      |       |
| IKBKG   | 8517 PharmGKB                   | artesanate   | artesanate                                         | ARTESUNATE                  | chembl:CHEMBL361497  | 2.27  |
| IKZF1   | 10320 CIViC                     | FLUDARAB     | FLUDARABINE                                        | FLUDARABINE                 | chembl:CHEMBL1568    | 1.06  |
| IL10    | 3586 NCI                        | FLUTICASO    | FLUTICASONE PROPIONATE                             |                             |                      |       |
| IL10RA  | 3587 GuideToPharmacagonist      | 178101673    | IL-10                                              | INTERLEUKIN-10              | chembl:CHEMBL4297771 | 12.73 |
| IL10RB  | 3588 ChemblInteractioagonist    | CHEMBL21     | (PEGINTERFERON LAMBD                               | PEGINTERFERON LAMBDA-1A     | chembl:CHEMBL2108723 | 31.83 |
| IL11    | 3589 NCI                        | ALENDRONA    | ALENDRONATE                                        | ALENDRONIC ACID             | chembl:CHEMBL870     | 2.27  |
| IL11RA  | 3590 TTD                        | BMT-11       | BMT-11                                             |                             |                      |       |
| IL12A   | 3592 TdgClinicalTrial           | BRIAKINUM    | BRIAKINUMAB                                        | BRIAKINUMAB                 | chembl:CHEMBL1742995 | 10.61 |
| IL12B   | 3593 TdgClinicalTrial           | BRIAKINUM    | BRIAKINUMAB                                        | BRIAKINUMAB                 | chembl:CHEMBL1742995 | 12.73 |
| IL12RB2 | 3595 TdgClinicalTrial           | INCELL-100   | INCELL-1001+ AD-1001                               |                             |                      |       |
| IL13    | 3596 PharmGKB                   | sunitinib    | sunitinib                                          | SUNITINIB                   | chembl:CHEMBL535     | 0.4   |
| IL13RA1 | 3597 TdgClinicalTrial           | CINTREDEK    | CINTREDEKIN BESUDOTOX                              |                             |                      |       |
| IL13RA2 | 3598 TTD                        | Tralokinumal | Tralokinumab                                       | TRALOKINUMAB                | chembl:CHEMBL1743081 | 10.61 |
| IL15    | 3600 NCI                        | LYMPHOKI     | LYMPHOKINE-ACTIVATED KILLER CELLS                  |                             |                      |       |
| IL15RA  | 3601 GuideToPharmacagonist      | 178101678    | IL-15                                              | INTERLEUKIN 15, RECOMBINANT | chembl:CHEMBL4297989 | 31.83 |
| IL16    | 3603 PharmGKB                   | Platinum cor | Platinum compounds                                 |                             |                      |       |
| IL17A   | 3605 ChemblInteractioinhibitor  | CHEMBL17     | SECUKINUMAB                                        | SECUKINUMAB                 | chembl:CHEMBL1743068 | 7.96  |
| IL17B   | 27190 TdgClinicalTrial          | VIDOFLUDI    | VIDOFLUDIMUS                                       | VIDOFLUDIMUS                | chembl:CHEMBL197194  | 12.73 |
| IL17C   | 27189 TdgClinicalTrial          | VIDOFLUDI    | VIDOFLUDIMUS                                       | VIDOFLUDIMUS                | chembl:CHEMBL197194  | 12.73 |
| IL17F   | 112744 NCI                      | TNF-ALPHA    | TNF-ALPHA                                          |                             |                      |       |
| IL17RA  | 23765 PharmGKB                  | Tumor necros | Tumor necrosis factor alpha (TNF-alpha) inhibitors |                             |                      |       |
| IL17RC  | 84818 NCI                       | IL-17        | IL-17                                              |                             |                      |       |
| IL18    | 3606 NCI                        | PPD          | PPD                                                |                             |                      |       |
| IL1A    | 3552 TEND                       | RILONACEP    | RILONACEPT                                         | RILONACEPT                  | chembl:CHEMBL1201830 | 21.22 |
| IL1B    | 3553 NCI                        | VERAPAMIL    | VERAPAMIL                                          | VERAPAMIL                   | chembl:CHEMBL6966    | 0.09  |
| IL1R1   | 3554 ChemblInteractioantagonist | CHEMBL12     | (ANAKINRA                                          | ANAKINRA                    | chembl:CHEMBL1201570 | 17.24 |
| IL1R2   | 7850 TEND                       | ANAKINRA     | ANAKINRA                                           | ANAKINRA                    | chembl:CHEMBL1201570 | 7.96  |
| IL1RL2  | 8808 TTD                        | BI655130     | BI655130                                           | SPESOLIMAB                  | chembl:CHEMBL4297911 | 63.65 |
| IL1RN   | 3557 TdgClinicalTrial           | AC-201       | AC-201                                             | DIACEREIN                   | chembl:CHEMBL41286   | 2.36  |
| IL2     | 3558 NCI                        | GARLIC EX    | GARLIC EXTRACT                                     |                             |                      |       |
| IL20    | 50604 TTD                       | NN-8226      | NN-8226                                            |                             |                      |       |
| IL21    | 59067 TTD                       | IL-21        | IL-21                                              | DENENICOKIN                 | chembl:CHEMBL2107855 | 15.91 |

|        |                                   |                |                                                                                       |                     |                      |        |
|--------|-----------------------------------|----------------|---------------------------------------------------------------------------------------|---------------------|----------------------|--------|
| IL21R  | 50615 TTD                         | Ab-01          | Ab-01                                                                                 |                     |                      |        |
| IL22   | 50616 ChEMBLInteraction inhibitor | CHEMBL174      | FEZAKINUMAB                                                                           | FEZAKINUMAB         | chembl:CHEMBL1743017 | 190.95 |
| IL23A  | 51561 TdgClinicalTrial            | BRIAKINUM      | BRIAKINUMAB                                                                           | BRIAKINUMAB         | chembl:CHEMBL1742995 | 7.07   |
| IL23R  | 149233 PharmGKB                   | celecoxib      | celecoxib                                                                             | CELECOXIB           | chembl:CHEMBL118     | 1.99   |
| IL24   | 11009 TTD                         | INGN-241       | INGN-241                                                                              |                     |                      |        |
| IL25   | 64806 TTD                         | ALX-0761       | ALX-0761                                                                              | M-1095              | chembl:CHEMBL4298023 | 15.91  |
| IL27   | 246778 NCI                        | VACCINE        | VACCINE                                                                               |                     |                      |        |
| IL2RA  | 3559 TdgClinicalTrial             | INCELL-100     | INCELL-1001+ AD-1001                                                                  |                     |                      |        |
| IL2RB  | 3560 TTD                          | Leukocyte int  | Leukocyte interleukin                                                                 |                     |                      |        |
| IL2RG  | 3561 ChEMBLInteractions           | CHEMBL12       | (DENILEUKIN DIFTITOX                                                                  | DENILEUKIN DIFTITOX | chembl:CHEMBL1201550 | 12.73  |
| IL3    | 3562 PharmGKB                     | tacrolimus     | tacrolimus                                                                            | TACROLIMUS          | chembl:CHEMBL269732  | 1.87   |
| IL31   | 386653 TTD                        | KPL-716        | KPL-716                                                                               |                     |                      |        |
| IL31RA | 133396 GuideToPharmacantibody     | 252827378      | NEMOLIZUMAB                                                                           | NEMOLIZUMAB         | chembl:CHEMBL4297794 | 63.65  |
| IL33   | 90865 TTD                         | AMG 282        | AMG 282                                                                               |                     |                      |        |
| IL37   | 27178 TTD                         | Tildrakizuma   | Tildrakizumab                                                                         | TILDRAKIZUMAB       | chembl:CHEMBL2108681 | 31.83  |
| IL3RA  | 3563 TTD                          | Flotetuzumab   | Flotetuzumab                                                                          | FLOTETUZUMAB        | chembl:CHEMBL3990038 | 12.73  |
| IL4    | 3565 TTD                          | Tepoxalin      | Tepoxalin                                                                             | TEPOXALIN           | chembl:CHEMBL316040  | 7.96   |
| IL4R   | 3566 PharmGKB                     | Hepatitis vac  | Hepatitis vaccines                                                                    |                     |                      |        |
| IL5    | 3567 TTD                          | Mepolizuma     | Mepolizumab                                                                           | MEPOLIZUMAB         | chembl:CHEMBL2108429 | 45.47  |
| IL5RA  | 3568 TTD                          | Benralizuma    | Benralizumab                                                                          | BENRALIZUMAB        | chembl:CHEMBL1742991 | 222.78 |
| IL6    | 3569 PharmGKB                     | Tumor necro    | Tumor necrosis factor alpha (TNF-alpha) inhibitors                                    |                     |                      |        |
| IL6R   | 3570 TTD                          | ALX-0061       | ALX-0061                                                                              | VOBARILIZUMAB       | chembl:CHEMBL3833343 | 7.07   |
| IL6ST  | 3572 DTC                          | BAZEDOXIF      | BAZEDOXIFENE                                                                          | BAZEDOXIFENE        | chembl:CHEMBL46740   | 10.61  |
| IL7    | 3574 NCI                          | RAPAMYCI       | RAPAMYCIN                                                                             | SIROLIMUS           | chembl:CHEMBL413     | 2.27   |
| IL7R   | 3575 TTD                          | PF-06342674    | PF-06342674                                                                           |                     |                      |        |
| IL9    | 3578 TTD                          | BNZ-1          | BNZ-1                                                                                 |                     |                      |        |
| IL9R   | 3581 NCI                          | IL-9           | IL-9                                                                                  |                     |                      |        |
| ILF3   | 3609 NCI                          | CSA            | CSA                                                                                   | CYCLOSPORINE        | chembl:CHEMBL160     | 1.03   |
| ILK    | 3611 TTD                          | US8754233,     | (US8754233, (4-Benzothiazol-2-yl)-1H-pyrazol-3-yl)-[2-(1H-imidazol-4-yl)-ethyl]-amine |                     |                      |        |
| ILKAP  | 80895 PharmGKB                    | hydrochloro    | hydrochlorothiazide                                                                   | HYDROCHLOROTHIAZIDE | chembl:CHEMBL435     | 1.77   |
| IMPA1  | 3612 ChEMBLInteraction inhibitor  | CHEMBL21       | (LITHIUM CITRATE HYDR.                                                                | LITHIUM CITRATE     | chembl:CHEMBL2103738 | 10.61  |
| IMPDH1 | 3614 TTD                          | Ribavirin      | Ribavirin                                                                             | RIBAVIRIN           | chembl:CHEMBL1643    | 1.35   |
| IMPDH2 | 3615 TEND                         | MYCOPHEN       | MYCOPHENOLATE MOFETIL                                                                 |                     |                      |        |
| INHA   | 3623 NCI                          | ANTISERUM      | ANTISERUM                                                                             |                     |                      |        |
| INHBA  | 3624 ChEMBLInteraction inhibitor  | CHEMBL174      | SOTATERCEPT                                                                           | SOTATERCEPT         | chembl:CHEMBL1743073 | 21.22  |
| INHBE  | 83729 NCI                         | GNRH           | GNRH                                                                                  | GONADORELIN ACETATE | chembl:CHEMBL1200511 | 31.83  |
| INPP1  | 3628 NCI                          | LITHIUM        | LITHIUM                                                                               | LITHIUM             | chembl:CHEMBL2146126 | 2.77   |
| INPP5A | 3632 GuideToPharmac inhibitor     | 252827501      | COMPOUND 5 [NOBLE ET AL., 1992]                                                       |                     |                      |        |
| INPP5D | 3635 GuideToPharmac activator     | 315661324      | ROSIPTOR                                                                              | ROSIPTOR            | chembl:CHEMBL3989954 | 63.65  |
| INPPL1 | 3636 NCI                          | ANTISENSE      | ANTISENSE OLIGONUCLEOTIDES                                                            |                     |                      |        |
| INS    | 3630 TTD                          | Insulin detem  | Insulin detemir                                                                       |                     |                      |        |
| INSIG2 | 51141 PharmGKB                    | antipsychotic: | antipsychotics                                                                        |                     |                      |        |

|          |                          |                |                                          |                     |                      |       |
|----------|--------------------------|----------------|------------------------------------------|---------------------|----------------------|-------|
| INS-IGF2 | 723961 PharmGKB          | Platinum con   | Platinum compounds                       |                     |                      |       |
| INSR     | 3643 TTD                 | Metformin gl   | Metformin glycinate                      |                     |                      |       |
| INSRR    | 3645 GuideToPharmac      | inhibitor      | 178103995 LINSITINIB                     | LINSITINIB          | chembl:CHEMBL1091644 | 3.98  |
| INVS     | 27130 PharmGKB           | duloxetine     | duloxetine                               | DULOXETINE          | chembl:CHEMBL1175    | 6.37  |
| IPO11    | 51194 TdgClinicalTrial   | MKC-1          | MKC-1                                    | ENMD-981693         | chembl:CHEMBL52885   | 2.36  |
| IPO13    | 9670 TdgClinicalTrial    | MKC-1          | MKC-1                                    | ENMD-981693         | chembl:CHEMBL52885   | 2.36  |
| IPO4     | 79711 TdgClinicalTrial   | MKC-1          | MKC-1                                    | ENMD-981693         | chembl:CHEMBL52885   | 2.36  |
| IPO7     | 10527 TdgClinicalTrial   | MKC-1          | MKC-1                                    | ENMD-981693         | chembl:CHEMBL52885   | 2.36  |
| IPO8     | 10526 TdgClinicalTrial   | MKC-1          | MKC-1                                    | ENMD-981693         | chembl:CHEMBL52885   | 2.36  |
| IPO9     | 55705 TdgClinicalTrial   | MKC-1          | MKC-1                                    | ENMD-981693         | chembl:CHEMBL52885   | 2.36  |
| IRAK1    | 3654 DTC                 | PF-562271      | PF-562271                                | PF-00562271         | chembl:CHEMBL1084546 | 0.03  |
| IRAK3    | 11213 GuideToPharmac     | inhibitor      | 249565893 COMPOUND R-16 [PMID: 21967808] |                     |                      |       |
| IRAK4    | 51135 GuideToPharmac     | inhibitor      | 249565762 ND-2110                        |                     |                      |       |
| IRF1     | 3659 NCI                 | CYTOKINES      | CYTOKINES                                |                     |                      |       |
| IRF1-AS1 | 441108 PharmGKB          | hydrochlorotl  | hydrochlorothiazide                      | HYDROCHLOROTHIAZIDE | chembl:CHEMBL435     | 3.54  |
| IRF2     | 3660 NCI                 | IFN            | IFN                                      |                     |                      |       |
| IRF3     | 3661 NCI                 | IFN            | IFN                                      |                     |                      |       |
| IRF6     | 3664 PharmGKB            | interferon bet | interferon beta-1b                       |                     |                      |       |
| IRS1     | 3667 TdgClinicalTrial    | GS-101         | GS-101                                   |                     |                      |       |
| IRS2     | 8660 NCI                 | DEXAMETH       | DEXAMETHASONE                            | DEXAMETHASONE       | chembl:CHEMBL384467  | 0.51  |
| ISG15    | 9636 MyCancerGenon       | inhibitor      | IRINOTECA IRINOTECAN                     | IRINOTECAN          | chembl:CHEMBL481     | 1.2   |
| ITGA1    | 3672 TTD                 | SAN-300        | SAN-300                                  | SAN-300             | chembl:CHEMBL4297822 | 63.65 |
| ITGA11   | 22801 NCI                | IFN            | IFN                                      |                     |                      |       |
| ITGA2    | 3673 TTD                 | E7820          | E7820                                    | E-7820              | chembl:CHEMBL4297376 | 15.91 |
| ITGA2B   | 3674 TdgClinicalTrial    | TIROFIBAN      | TIROFIBAN                                | TIROFIBAN           | chembl:CHEMBL916     | 14.14 |
| ITGA3    | 3675 GuideToPharmacology | 252827506      | PEPTIDE LIGAND 2 [PMID: 19055415]        |                     |                      |       |
| ITGA4    | 3676 TTD                 | Vedolizumab    | Vedolizumab                              |                     |                      |       |
| ITGA5    | 3678 ChemblInteractio    | antagonist     | CHEMBL21(VOLOCIXIMAB                     | VOLOCIXIMAB         | chembl:CHEMBL2108061 | 9.09  |
| ITGAL    | 3683 DTC                 | CASEARIN       | CASEARINONE B                            | CASEARINONE B       | chembl:CHEMBL459014  | 7.49  |
| ITGAM    | 3684 NCI                 | DMSO           | DMSO                                     | DIMETHYL SULFOXIDE  | chembl:CHEMBL504     | 2.12  |
| ITGAV    | 3685 ChemblInteractio    | inhibitor      | CHEMBL21(DII7E6                          | ABITUZUMAB          | chembl:CHEMBL2109621 | 2.55  |
| ITGAX    | 3687 NCI                 | PROTEASE       | PROTEASE INHIBITORS                      |                     |                      |       |
| ITGB1    | 3688 TdgClinicalTrial    | FIRATEGRA      | FIRATEGRAST                              | FIRATEGRAST         | chembl:CHEMBL2104967 | 4.71  |
| ITGB2    | 3689 NCI                 | LAK CELL       | LAK CELL                                 |                     |                      |       |
| ITGB3    | 3690 PharmGKB            | abciximab      | abciximab                                | ABCIXIMAB           | chembl:CHEMBL1201584 | 8.34  |
| ITGB5    | 3693 TdgClinicalTrial    | CNTO-95        | CNTO-95                                  | INTETUMUMAB         | chembl:CHEMBL1743032 | 6.37  |
| ITGB6    | 3694 GuideToPharmac      | inhibitor      | 385612210 COMPOUND 7 [PMID: 31381331]    |                     |                      |       |
| ITGB7    | 3695 ChemblInteractio    | antagonist     | CHEMBL21(FIRATEGRAST                     | FIRATEGRAST         | chembl:CHEMBL2104967 | 4.24  |
| ITGB8    | 3696 TTD                 | US10035778,    | US10035778, Example 16                   |                     |                      |       |
| ITIH3    | 3699 PharmGKB            | clozapine      | clozapine                                | CLOZAPINE           | chembl:CHEMBL42      | 1.79  |
| ITK      | 3702 DTC                 | GO-6976        | GO-6976                                  | GO-6976             | chembl:CHEMBL302449  | 0.08  |
| ITPA     | 3704 PharmGKB            | peginterferon  | peginterferon alfa-2b                    |                     |                      |       |

|        |                         |            |                                            |                         |                      |      |
|--------|-------------------------|------------|--------------------------------------------|-------------------------|----------------------|------|
| ITPKA  | 3706 GuideToPharmac     | inhibitor  | 336446934 GNF362                           |                         |                      |      |
| ITPKB  | 3707 GuideToPharmac     | inhibitor  | 336446934 GNF362                           |                         |                      |      |
| ITPKC  | 80271 GuideToPharmac    | inhibitor  | 336446934 GNF362                           |                         |                      |      |
| ITPR1  | 3708 GuideToPharmac     | antagonist | 135651544 PIP2                             |                         |                      |      |
| ITPR2  | 3709 GuideToPharmac     | activator  | 178101040 INOSITOL 2,4,5-TRISPHOSPHATE     |                         |                      |      |
| ITPR3  | 3710 GuideToPharmac     | activator  | 135652731 CA2+                             |                         |                      |      |
| IVL    | 3713 NCI                |            | TOPICAL CCTOPICAL CORTICOSTEROIDS          |                         |                      |      |
| JAG1   | 182 NCI                 |            | CORTISOL CORTISOL                          | HYDROCORTISONE          | chembl:CHEMBL389621  | 3.35 |
| JAK1   | 3716 CIViC              |            | PEMBROLIZPEMBROLIZUMAB                     | PEMBROLIZUMAB           | chembl:CHEMBL3137343 | 0.39 |
| JAK2   | 3717 MyCancerGenon      | inhibitor  | RUXOLITINRUXOLITINIB                       | RUXOLITINIB             | chembl:CHEMBL1789941 | 4.01 |
| JAK3   | 3718 TTD                |            | PyrazolopyricPyrazolopyridine derivative 2 |                         |                      |      |
| JUN    | 3725 DTC                |            | DIPHENHYDIPHENHYDRAMINE HYD                | DIPHENHYDRAMINE HYDROCF | chembl:CHEMBL1620    | 0.36 |
| JUNB   | 3726 NCI                |            | UVB UVB                                    |                         |                      |      |
| JUND   | 3727 NCI                |            | CLOZAPINECLOZAPINE                         | CLOZAPINE               | chembl:CHEMBL42      | 1.79 |
| KAT2A  | 2648 DTC                |            | PD-146176 PD-146176                        | CHEMBL180917            | chembl:CHEMBL180917  | 0.25 |
| KAT2B  | 8850 PharmGKB           |            | amphetamineamphetamine                     | AMPHETAMINE             | chembl:CHEMBL405     | 0.33 |
| KAT5   | 10524 GuideToPharmac    | inhibitor  | 187051791 MG149                            |                         |                      |      |
| KAT8   | 84148 GuideToPharmac    | inhibitor  | 187051791 MG149                            |                         |                      |      |
| KCNA1  | 3736 NCI                |            | BUPIVACAIBUPIVACAINE                       | BUPIVACAINE             | chembl:CHEMBL1098    | 0.96 |
| KCNA10 | 3744 GuideToPharmac     | blocker    | 135651305 VERAPAMIL                        | VERAPAMIL               | chembl:CHEMBL6966    | 0.23 |
| KCNA2  | 3737 ChemblInteractio   | blocker    | CHEMBL28<DALFAMPRIDINE                     | DALFAMPRIDINE           | chembl:CHEMBL284348  | 0.49 |
| KCNA3  | 3738 ChemblInteractio   | blocker    | CHEMBL21(NERISPIRDINE                      | NERISPIRDINE            | chembl:CHEMBL2107762 | 0.21 |
| KCNA4  | 3739 NCI                |            | VERAPAMIIVERAPAMIL                         | VERAPAMIL               | chembl:CHEMBL6966    | 0.64 |
| KCNA5  | 3741 GuideToPharmac     | blocker    | 135650266 FLECAINIDE                       | FLECAINIDE              | chembl:CHEMBL652     | 0.48 |
| KCNA6  | 3742 ChemblInteractio   | blocker    | CHEMBL12(GUANIDINE HYDROCHLC               | GUANIDINE HYDROCHLORIDE | chembl:CHEMBL1200728 | 0.41 |
| KCNA7  | 3743 ChemblInteractio   | blocker    | CHEMBL21(NERISPIRDINE                      | NERISPIRDINE            | chembl:CHEMBL2107762 | 0.16 |
| KCNB1  | 3745 GuideToPharmac     | inhibitor  | 223366093 GXTX-1E                          |                         |                      |      |
| KCNB2  | 9312 ChemblInteractio   | blocker    | CHEMBL28<DALFAMPRIDINE                     | DALFAMPRIDINE           | chembl:CHEMBL284348  | 0.89 |
| KCNC1  | 3746 ChemblInteractio   | blocker    | CHEMBL21(NERISPIRDINE                      | NERISPIRDINE            | chembl:CHEMBL2107762 | 0.32 |
| KCNC2  | 3747 ChemblInteractio   | blocker    | CHEMBL12(GUANIDINE HYDROCHLC               | GUANIDINE HYDROCHLORIDE | chembl:CHEMBL1200728 | 0.41 |
| KCNC3  | 3748 ChemblInteractio   | blocker    | CHEMBL11<TEDISAMIL                         | TEDISAMIL               | chembl:CHEMBL2111110 | 0.41 |
| KCNC4  | 3749 ChemblInteractio   | blocker    | CHEMBL28<DALFAMPRIDINE                     | DALFAMPRIDINE           | chembl:CHEMBL284348  | 0.37 |
| KCND1  | 3750 ChemblInteractio   | blocker    | CHEMBL21(NERISPIRDINE                      | NERISPIRDINE            | chembl:CHEMBL2107762 | 0.32 |
| KCND2  | 3751 ChemblInteractio   | blocker    | CHEMBL28<DALFAMPRIDINE                     | DALFAMPRIDINE           | chembl:CHEMBL284348  | 0.74 |
| KCND3  | 3752 ChemblInteractio   | blocker    | CHEMBL12(GUANIDINE HYDROCHLC               | GUANIDINE HYDROCHLORIDE | chembl:CHEMBL1200728 | 0.41 |
| KCNE1  | 3753 PharmGKB           |            | quinidine quinidine                        | QUINIDINE               | chembl:CHEMBL1294    | 0.67 |
| KCNF1  | 3754 ChemblInteractio   | blocker    | CHEMBL21(NERISPIRDINE                      | NERISPIRDINE            | chembl:CHEMBL2107762 | 0.32 |
| KCNG1  | 3755 ChemblInteractio   | blocker    | CHEMBL11<TEDISAMIL                         | TEDISAMIL               | chembl:CHEMBL2111110 | 0.41 |
| KCNG2  | 26251 ChemblInteractio  | blocker    | CHEMBL11<TEDISAMIL                         | TEDISAMIL               | chembl:CHEMBL2111110 | 0.41 |
| KCNG3  | 170850 ChemblInteractio | blocker    | CHEMBL11<TEDISAMIL                         | TEDISAMIL               | chembl:CHEMBL2111110 | 0.41 |
| KCNH1  | 3756 GuideToPharmac     | blocker    | 135650345 HALOPERIDOL                      | HALOPERIDOL             | chembl:CHEMBL54      | 0.07 |
| KCNH2  | 3757 DTC                |            | BENZTROPBENZTROPINE MESYLAT                | BENZTROPINE MESYLATE    | chembl:CHEMBL1200383 | 0.09 |

|        |                                |                                      |                                     |                      |                      |       |
|--------|--------------------------------|--------------------------------------|-------------------------------------|----------------------|----------------------|-------|
| KCNH3  | 23416 ChemblInteractioblocker  | CHEMBL28: DALFAMPRIDINE              | DALFAMPRIDINE                       | chembl:CHEMBL284348  | 0.37                 |       |
| KCNH4  | 23415 ChemblInteractioblocker  | CHEMBL12(GUANIDINE HYDROCHL          | CGUANIDINE HYDROCHLORIDE            | chembl:CHEMBL1200728 | 0.41                 |       |
| KCNH5  | 27133 GuideToPharmac blocker   | 135650872 QUINIDINE                  | QUINIDINE                           | chembl:CHEMBL1294    | 0.67                 |       |
| KCNH6  | 81033 GuideToPharmac inhibitor | 135652149 ERGTX-1                    |                                     |                      |                      |       |
| KCNH7  | 90134 ChemblInteractioblocker  | CHEMBL11: TEDISAMIL                  | TEDISAMIL                           | chembl:CHEMBL2111110 | 0.41                 |       |
| KCNH8  | 131096 ChemblInteractioblocker | CHEMBL12(GUANIDINE HYDROCHL          | CGUANIDINE HYDROCHLORIDE            | chembl:CHEMBL1200728 | 0.41                 |       |
| KCNIP1 | 30820 PharmGKB                 | verapamil verapamil                  | VERAPAMIL                           | chembl:CHEMBL6966    | 6.37                 |       |
| KCNIP4 | 80333 PharmGKB                 | Ace Inhibitor: Ace Inhibitors, Plain |                                     |                      |                      |       |
| KCNJ1  | 3758 TTD                       | PMID260044                           | PMID26004420-Compound-WO2014150132B |                      |                      |       |
| KCNJ10 | 3766 TTD                       | Glisoxepide                          | Glisoxepide                         | GLISOXEPIDE          | chembl:CHEMBL2106618 | 7.96  |
| KCNJ11 | 3767 ChemblInteractioblocker   | CHEMBL10: GLIPIZIDE                  | GLIPIZIDE                           | chembl:CHEMBL1073    | 2.19                 |       |
| KCNJ12 | 3768 TEND                      | DOFETILID                            | DOFETILIDE                          | DOFETILIDE           | chembl:CHEMBL473     | 15.91 |
| KCNJ13 | 3769 GuideToPharmac blocker    | 135649796 FAMPRIDINE                 | DALFAMPRIDINE                       | chembl:CHEMBL284348  | 1.48                 |       |
| KCNJ14 | 3770 GuideToPharmac blocker    | 135652729 BA2+                       |                                     |                      |                      |       |
| KCNJ2  | 3759 ChemblInteractioblocker   | CHEMBL12(DRONEDARONE HYDROCD         | RONEDARONE HYDROCHLOR               | chembl:CHEMBL1201729 | 3.98                 |       |
| KCNJ3  | 3760 GuideToPharmac activator  | 135652743 NA+                        |                                     |                      |                      |       |
| KCNJ4  | 3761 GuideToPharmac blocker    | 135651249 TETRAETHYLAMMONIUM         |                                     |                      |                      |       |
| KCNJ5  | 3762 TdgClinicalTrial          | FLUPIRTINE                           | FLUPIRTINE                          | FLUPIRTINE           | chembl:CHEMBL255044  | 3.98  |
| KCNJ6  | 3763 PharmGKB                  | fentanyl                             | fentanyl                            | FENTANYL             | chembl:CHEMBL596     | 0.49  |
| KCNJ8  | 3764 GuideToPharmac activator  | 135650138 CROMAKALIM                 | CROMAKALIM                          | chembl:CHEMBL49035   | 7.96                 |       |
| KCNJ9  | 3765 GuideToPharmac activator  | 135651544 PIP2                       |                                     |                      |                      |       |
| KCNK10 | 54207 GuideToPharmac activator | 135650346 HALOTHANE                  | HALOTHANE                           | chembl:CHEMBL931     | 0.68                 |       |
| KCNK12 | 56660 GuideToPharmac inhibitor | 135650346 HALOTHANE                  | HALOTHANE                           | chembl:CHEMBL931     | 2.05                 |       |
| KCNK13 | 56659 GuideToPharmac inhibitor | 135650346 HALOTHANE                  | HALOTHANE                           | chembl:CHEMBL931     | 2.05                 |       |
| KCNK16 | 83795 GuideToPharmac activator | 53801075 ISOFLURANE                  | ISOFLURANE                          | chembl:CHEMBL1256    | 0.55                 |       |
| KCNK17 | 89822 GuideToPharmac activator | 178100228 NO                         | NITRIC OXIDE                        | chembl:CHEMBL1200689 | 5.3                  |       |
| KCNK18 | 338567 ChemblInteractions      | CHEMBL12: ENFLURANE                  | ENFLURANE                           | chembl:CHEMBL1257    | 0.41                 |       |
| KCNK2  | 3776 ChemblInteractions        | CHEMBL12( SEVOFLURANE                | SEVOFLURANE                         | chembl:CHEMBL1200694 | 0.19                 |       |
| KCNK3  | 3777 ChemblInteractioblocker   | CHEMBL12(DOXAPRAM HYDROCHL           | CDOXAPRAM HYDROCHLORIDE             | chembl:CHEMBL1200876 | 3.98                 |       |
| KCNK4  | 50801 GuideToPharmac activator | 135650900 RILUZOLE                   | RILUZOLE                            | chembl:CHEMBL744     | 2.77                 |       |
| KCNK5  | 8645 GuideToPharmac blocker    | 135650872 QUINIDINE                  | QUINIDINE                           | chembl:CHEMBL1294    | 1.68                 |       |
| KCNK9  | 51305 ChemblInteractions       | CHEMBL12( DESFLURANE                 | DESFLURANE                          | chembl:CHEMBL1200733 | 0.3                  |       |
| KCNMA1 | 3778 ChemblInteractioactivator | CHEMBL11: ANDOLAST                   | ANDOLAST                            | chembl:CHEMBL119549  | 3.54                 |       |
| KCNMB1 | 3779 PharmGKB                  | verapamil verapamil                  | VERAPAMIL                           | chembl:CHEMBL6966    | 6.37                 |       |
| KCNN1  | 3780 GuideToPharmac activator  | 318164832 GW542573X                  |                                     |                      |                      |       |
| KCNN2  | 3781 GuideToPharmac blocker    | 135651249 TETRAETHYLAMMONIUM         |                                     |                      |                      |       |
| KCNN3  | 3782 GuideToPharmac blocker    | 135652375 P05                        |                                     |                      |                      |       |
| KCNN4  | 3783 ChemblInteractioblocker   | CHEMBL40: SENICAPOC                  | SENICAPOC                           | chembl:CHEMBL405821  | 38.19                |       |
| KCNQ1  | 3784 TEND                      | INDAPAMID                            | INDAPAMIDE                          | INDAPAMIDE           | chembl:CHEMBL406     | 6.82  |
| KCNQ2  | 3785 GuideToPharmac activator  | 135651544 PIP2                       |                                     |                      |                      |       |
| KCNQ3  | 3786 TTD                       | ICA-105665                           | ICA-105665                          |                      |                      |       |
| KCNQ4  | 9132 GuideToPharmac inhibitor  | 135651334 XE991                      |                                     |                      |                      |       |

|         |                                  |            |                                                         |                          |                      |       |
|---------|----------------------------------|------------|---------------------------------------------------------|--------------------------|----------------------|-------|
| KCNQ5   | 56479 PharmGKB                   | irinotecan | irinotecan                                              | IRINOTECAN               | chembl:CHEMBL481     | 0.24  |
| KCNS1   | 3787 ChemblInteractio            | blocker    | CHEMBL12(GUANIDINE HYDROCHL                             | CGUANIDINE HYDROCHLORIDE | chembl:CHEMBL1200728 | 0.41  |
| KCNS2   | 3788 ChemblInteractio            | blocker    | CHEMBL12(GUANIDINE HYDROCHL                             | CGUANIDINE HYDROCHLORIDE | chembl:CHEMBL1200728 | 0.41  |
| KCNS3   | 3790 ChemblInteractio            | blocker    | CHEMBL12(GUANIDINE HYDROCHL                             | CGUANIDINE HYDROCHLORIDE | chembl:CHEMBL1200728 | 0.41  |
| KCNT1   | 57582 TTD                        |            | phorbol 12-mphorbol 12-myristate 13-acetate             |                          |                      |       |
| KCNT2   | 343450 GuideToPharmac            | blocker    | 135651249 TETRAETHYLAMMONIUM                            |                          |                      |       |
| KCNU1   | 157855 GuideToPharmac            | activator  | 178101088 NS004                                         |                          |                      |       |
| KCNV1   | 27012 ChemblInteractio           | blocker    | CHEMBL11:TEDISAMIL                                      | TEDISAMIL                | chembl:CHEMBL2111110 | 0.41  |
| KCNV2   | 169522 ChemblInteractio          | blocker    | CHEMBL28: DALFAMPRIDINE                                 | DALFAMPRIDINE            | chembl:CHEMBL284348  | 0.37  |
| KDM1A   | 23028 GuideToPharmac             | inhibitor  | 178103603 NCL-1                                         |                          |                      |       |
| KDM1B   | 221656 TTD                       |            | Tamylcypron Tamylcypromine derivative 3                 |                          |                      |       |
| KDM2A   | 22992 GuideToPharmac             | inhibitor  | 178103604 DAMINOZIDE                                    |                          |                      |       |
| KDM3A   | 55818 GuideToPharmac             | inhibitor  | 249565910 IOX1                                          |                          |                      |       |
| KDM4A   | 9682 DTC                         |            | CLOFAZIMICLOFAZIMINE                                    | CLOFAZIMINE              | chembl:CHEMBL1292    | 0.03  |
| KDM4C   | 23081 DTC                        |            | PYROGALLPYROGALLOL RED                                  | PYROGALLOL RED           | chembl:CHEMBL210208  | 0.21  |
| KDM4D   | 55693 DTC                        |            | N-METHOX N-METHOXYCARBONYLM                             | CHEMBL92309              | chembl:CHEMBL92309   | 21.22 |
| KDM4E   | 390245 DTC                       |            | NSC-50654 NSC-50654                                     | CHEMBL1372046            | chembl:CHEMBL1372046 | 0.05  |
| KDM5A   | 5927 TTD                         |            | BDBM50158BDBM50158803                                   |                          |                      |       |
| KDM5B   | 10765 GuideToPharmac             | inhibitor  | 375973270 COMPOUND 9 [DOI:10.26434/CHEMRXIV.7072592.V1] |                          |                      |       |
| KDM5C   | 8242 GuideToPharmac              | inhibitor  | 310264759 GSK-J4                                        |                          |                      |       |
| KDM6A   | 7403 OncoKB                      |            | Tazemetostat Tazemetostat                               | TAZEMETOSTAT             | chembl:CHEMBL3414621 | 12.73 |
| KDM6B   | 23135 GuideToPharmac             | inhibitor  | 310264759 GSK-J4                                        |                          |                      |       |
| KDM7A   | 80853 GuideToPharmac             | inhibitor  | 178103604 DAMINOZIDE                                    |                          |                      |       |
| KDR     | 3791 TdgClinicalTrial            |            | LENVATINILENVATINIB                                     | LENVATINIB               | chembl:CHEMBL1289601 | 0.23  |
| KEAP1   | 9817 ChemblInteractio            | inhibitor  | CHEMBL17:BARDOXOLONE METHYLB                            | BARDOXOLONE METHYL       | chembl:CHEMBL1762621 | 2.65  |
| KHK     | 3795 PharmGKB                    |            | fructose fructose                                       | FRUCTOSE                 | chembl:CHEMBL604608  | 63.65 |
| KHSRP   | 8570 DTC                         |            | GO-Y030 GO-Y030                                         | CHEMBL598509             | chembl:CHEMBL598509  | 63.65 |
| KIF11   | 3832 TdgClinicalTrial            |            | ARQ-621 ARQ-621                                         |                          |                      |       |
| KIF6    | 221458 PharmGKB                  |            | atorvastatin atorvastatin                               | ATORVASTATIN             | chembl:CHEMBL1487    | 1.59  |
| KIR2DL1 | 3802 ChemblInteractio            | inhibitor  | CHEMBL21(IPH-2101                                       | IPH-2101                 | chembl:CHEMBL2109498 | 6.37  |
| KIR2DL2 | 3803 ChemblInteractio            | inhibitor  | CHEMBL21(IPH-2101                                       | IPH-2101                 | chembl:CHEMBL2109498 | 19.1  |
| KIR2DL3 | 3804 TTD                         |            | IPH-2101 IPH-2101                                       | IPH-2101                 | chembl:CHEMBL2109498 | 19.1  |
| KIR2DS1 | 3806 TTD                         |            | IPH-2101 IPH-2101                                       | IPH-2101                 | chembl:CHEMBL2109498 | 25.46 |
| KIR2DS2 | 100132285 TTD                    |            | IPH-2101 IPH-2101                                       | IPH-2101                 | chembl:CHEMBL2109498 | 25.46 |
| KIR2DS4 | 3809 PharmGKB                    |            | methotrexate methotrexate                               | METHOTREXATE             | chembl:CHEMBL34259   | 1.18  |
| KIR3DL2 | 3812 TTD                         |            | IPH4102 IPH4102                                         | LACUTAMAB                | chembl:CHEMBL4297998 | 63.65 |
| KIR3DL3 | 115653 ClarityFoundationClinical |            | N/A N/A                                                 |                          |                      |       |
| KISS1   | 3814 TTD                         |            | TAK-448 TAK-448                                         | TAK-448                  | chembl:CHEMBL3924151 | 31.83 |
| KISS1R  | 84634 GuideToPharmac             | agonist    | 381744904 TAK-448                                       | TAK-448                  | chembl:CHEMBL3924151 | 10.61 |
| KIT     | 3815 TTD                         |            | Pazopanib H(Pazopanib HCl                               |                          |                      |       |
| KL      | 9365 PharmGKB                    |            | corticosteroidcorticosteroids                           |                          |                      |       |
| KLB     | 152831 TTD                       |            | NGM313 NGM313                                           |                          |                      |       |

|         |                           |                                |                                             |               |                      |       |
|---------|---------------------------|--------------------------------|---------------------------------------------|---------------|----------------------|-------|
| KLC1    | 3831 PharmGKB             | fluorouracil                   | fluorouracil                                | FLUOROURACIL  | chembl:CHEMBL185     | 0.4   |
| KLC3    | 147700 PharmGKB           | gemcitabine                    | gemcitabine                                 | GEMCITABINE   | chembl:CHEMBL888     | 0.2   |
| KLF4    | 9314 TTD                  | APTO-253                       | APTO-253                                    | APTO-253      | chembl:CHEMBL4297261 | 31.83 |
| KLF5    | 688 DTC                   | OUABAIN                        | OUABAIN                                     | OUABAIN       | chembl:CHEMBL222863  | 1.77  |
| KLK1    | 3816 TEND                 | ECALLANTIDE                    | ECALLANTIDE                                 | ECALLANTIDE   | chembl:CHEMBL1201837 | 31.83 |
| KLK14   | 43847 GuideToPharmac      | inhibitor                      | 252166696 COMPOUND 3 [PMID: 23849879]       |               |                      |       |
| KLK2    | 3817 GuideToPharmac       | inhibitor                      | 252166692 PEPTIDE KLK2B(C1)                 |               |                      |       |
| KLK3    | 354 ChemblInteractio      | inhibitor                      | CHEMBL12(ECALLANTIDE                        | ECALLANTIDE   | chembl:CHEMBL1201837 | 0.88  |
| KLK4    | 9622 TTD                  | Benzyl amine                   | Benzyl amine derivative 1                   |               |                      |       |
| KLK5    | 25818 GuideToPharmac      | inhibitor                      | 252166696 COMPOUND 3 [PMID: 23849879]       |               |                      |       |
| KLK6    | 5653 GuideToPharmac       | inhibitor                      | 404859022 DKFZ-251                          |               |                      |       |
| KLK7    | 5650 GuideToPharmac       | inhibitor                      | 252166696 COMPOUND 3 [PMID: 23849879]       |               |                      |       |
| KLK8    | 11202 GuideToPharmac      | inhibitor                      | 404859023 COMPOUND 32 [PMID: 31675166]      |               |                      |       |
| KLKB1   | 3818 TTD                  | KVD001                         | KVD001                                      |               |                      |       |
| KLRC1   | 3821 TTD                  | Monalizumab                    | Monalizumab                                 | MONALIZUMAB   | chembl:CHEMBL4297787 | 127.3 |
| KLRD1   | 3824 PharmGKB             | adalimumab                     | adalimumab                                  | ADALIMUMAB    | chembl:CHEMBL1201580 | 1.87  |
| KLRK1   | 22914 TTD                 | CYAD-101                       | CYAD-101                                    |               |                      |       |
| KMO     | 8564 TTD                  | Pyrimidine bc                  | Pyrimidine benzenesulfonamide derivative 2  |               |                      |       |
| KMT2A   | 4297 DTC                  | DIFLUFENIC                     | DIFLUFENICAN                                | DIFLUFENICAN  | chembl:CHEMBL1425995 | 0.42  |
| KMT2C   | 58508 CIViC               | EXEMESTA                       | EXEMESTANE                                  | EXEMESTANE    | chembl:CHEMBL1200374 | 3.03  |
| KMT2D   | 8085 CIViC                | HDAC INHIBIT                   | HDAC INHIBITOR AR-42                        |               |                      |       |
| KMT2E   | 55904 PharmGKB            | duloxetine                     | duloxetine                                  | DULOXETINE    | chembl:CHEMBL1175    | 6.37  |
| KMT5A   | 387893 GuideToPharmac     | inhibitor                      | 178102575 CDK4 INHIBITOR III                |               |                      |       |
| KMT5B   | 51111 GuideToPharmac      | inhibitor                      | 310264730 A-196                             |               |                      |       |
| KMT5C   | 84787 GuideToPharmac      | inhibitor                      | 310264730 A-196                             |               |                      |       |
| KNG1    | 3827 PharmGKB             | hormonal con                   | hormonal contraceptives for systemic use    |               |                      |       |
| KRAS    | 3845 JAX-CKB              | lenalidomide                   | lenalidomide                                | LENALIDOMIDE  | chembl:CHEMBL848     | 0.07  |
| KRT10   | 3858 NCI                  | EGFR TYROE                     | EGFR TYROSINE KINASE INHIBITOR              |               |                      |       |
| KRT17   | 3872 NCI                  | IFN                            | IFN                                         |               |                      |       |
| KRT18   | 3875 NCI                  | ANTIVIRAL                      | ANTIVIRAL                                   |               |                      |       |
| KRT19   | 3880 NCI                  | PD-98059                       | PD-98059                                    | CHEMBL35482   | chembl:CHEMBL35482   | 1.72  |
| KRT20   | 54474 NCI                 | CISPLATIN                      | CISPLATIN                                   | CISPLATIN     | chembl:CHEMBL11359   | 0.88  |
| KRT6A   | 3853 TdgClinicalTrial     | TD101                          | TD101                                       |               |                      |       |
| KYAT1   | 883 DTC                   | TRANS-3-INTRANS-3-INDOLEACRYLI | CHEMBL445966                                |               | chembl:CHEMBL445966  | 42.43 |
| L1CAM   | 3897 TTD                  | CD171 specific                 | CD171 specific CAR T cells expressing EGFRt |               |                      |       |
| L3MBTL1 | 26013 DTC                 | NSC-175743                     | NSC-175743                                  | CHEMBL1609016 | chembl:CHEMBL1609016 | 0.29  |
| L3MBTL3 | 84456 GuideToPharmac      | agonist                        | 249565912 UNC1215                           |               |                      |       |
| LAG3    | 3902 TTD                  | FS118                          | FS118                                       |               |                      |       |
| LAMA1   | 284217 ChemblInteractions | CHEMBL205OCRIPLASMIN           | CHEMBL205OCRIPLASMIN                        | OCRIPLASMIN   | chembl:CHEMBL2095222 | 1.72  |
| LAMA2   | 3908 ChemblInteractions   | CHEMBL205OCRIPLASMIN           | CHEMBL205OCRIPLASMIN                        | OCRIPLASMIN   | chembl:CHEMBL2095222 | 1.72  |
| LAMA3   | 3909 ChemblInteractions   | CHEMBL205OCRIPLASMIN           | CHEMBL205OCRIPLASMIN                        | OCRIPLASMIN   | chembl:CHEMBL2095222 | 1.72  |
| LAMA4   | 3910 ChemblInteractions   | CHEMBL205OCRIPLASMIN           | CHEMBL205OCRIPLASMIN                        | OCRIPLASMIN   | chembl:CHEMBL2095222 | 1.72  |

|           |                                 |                                            |                           |                      |        |
|-----------|---------------------------------|--------------------------------------------|---------------------------|----------------------|--------|
| LAMA5     | 3911 ChEMBLInteractions         | CHEMBL209OCRIPLASMIN                       | OCRIPLASMIN               | chembl:CHEMBL2095222 | 1.72   |
| LAMB1     | 3912 ChEMBLInteractions         | CHEMBL209OCRIPLASMIN                       | OCRIPLASMIN               | chembl:CHEMBL2095222 | 1.72   |
| LAMB2     | 3913 ChEMBLInteractions         | CHEMBL209OCRIPLASMIN                       | OCRIPLASMIN               | chembl:CHEMBL2095222 | 1.72   |
| LAMB3     | 3914 ChEMBLInteractions         | CHEMBL209OCRIPLASMIN                       | OCRIPLASMIN               | chembl:CHEMBL2095222 | 1.72   |
| LAMB4     | 22798 ChEMBLInteractions        | CHEMBL209OCRIPLASMIN                       | OCRIPLASMIN               | chembl:CHEMBL2095222 | 1.72   |
| LAMC2     | 3918 ChEMBLInteractions         | CHEMBL209OCRIPLASMIN                       | OCRIPLASMIN               | chembl:CHEMBL2095222 | 1.72   |
| LAMC3     | 10319 ChEMBLInteractions        | CHEMBL209OCRIPLASMIN                       | OCRIPLASMIN               | chembl:CHEMBL2095222 | 1.72   |
| LAMP1     | 3916 NCI                        | DIMETHYL DIMETHYL SULFOXIDE                |                           |                      |        |
| LANCL2    | 55915 GuideToPharmacology       | 384403642 ABSCISIC ACID                    |                           |                      |        |
| LAP3      | 51056 ChEMBLInteractioinhibitor | CHEMBL21(TOSEDOSTAT                        | TOSEDOSTAT                | chembl:CHEMBL2103847 | 3.35   |
| LAT       | 27040 DTC                       | TRIDOLGOSTRIDOLGOSIR                       | TRIDOLGOSIR               | chembl:CHEMBL371197  | 42.43  |
| LATS2     | 26524 GuideToPharmacinhibitor   | 249565889 COMPOUND 35 [PMID: 20684608]     |                           |                      |        |
| LCAT      | 3931 TTD                        | MEDI6012 MEDI6012                          | RECOMBINANT HUMAN LECITIN | chembl:CHEMBL4297868 | 31.83  |
| LCK       | 3932 GuideToPharmacinhibitor    | 315661265 ECF506                           |                           |                      |        |
| LCT       | 3938 NCI                        | DMM DMM                                    |                           |                      |        |
| LDHA      | 3939 NCI                        | ANTHRACYANTHRACYCLINES                     |                           |                      |        |
| LDLR      | 3949 TTD                        | Porfimer Sod Porfimer Sodium               |                           |                      |        |
| LEP       | 3952 NCI                        | NICOTINE CNICOTINE GUM                     |                           |                      |        |
| LEPR      | 3953 PharmGKB                   | antipsychotic:antipsychotics               |                           |                      |        |
| LGALS1    | 3956 TTD                        | US8703720, US8703720, Reference Compound 2 |                           |                      |        |
| LGALS2    | 3957 NCI                        | MITOMYCINMITOMYCIN C                       |                           |                      |        |
| LGALS3    | 3958 DTC                        | LACTOSE, ALACTOSE, ANHYDROUS               | LACTOSE, ANHYDROUS        | chembl:CHEMBL417016  | 13.64  |
| LGALS8    | 3964 DTC                        | LACTOSE, ALACTOSE, ANHYDROUS               | LACTOSE, ANHYDROUS        | chembl:CHEMBL417016  | 18.19  |
| LGALS9    | 3965 DTC                        | LACTOSE, ALACTOSE, ANHYDROUS               | LACTOSE, ANHYDROUS        | chembl:CHEMBL417016  | 18.19  |
| LGMN      | 5641 GuideToPharmacinhibitor    | 252166833 COMPOUND 7U [PMID: 24775305]     |                           |                      |        |
| LGR4      | 55366 GuideToPharmacagonist     | 178100589 R-SPONDIN-4                      |                           |                      |        |
| LGR5      | 8549 PharmGKB                   | fluorouracil fluorouracil                  | FLUOROURACIL              | chembl:CHEMBL185     | 1.21   |
| LGR6      | 59352 GuideToPharmacagonist     | 178102181 R-SPONDIN-1                      |                           |                      |        |
| LHCGR     | 3973 ChEMBLInteractioagonist    | CHEMBL12(CHORIOGONADOTROPIN                | CHORIOGONADOTROPIN ALFA   | chembl:CHEMBL1201464 | 10.61  |
| LHFPL3    | 375612 PharmGKB                 | corticosteroidcorticosteroids              |                           |                      |        |
| LIF       | 3976 NCI                        | RETINOIC ARETINOIC ACID                    |                           |                      |        |
| LIFR      | 3977 TTD                        | Emfilermin Emfilermin                      | EMFILERMIN                | chembl:CHEMBL2108400 | 127.3  |
| LIG1      | 3978 TEND                       | BLEOMYCINBLEOMYCIN                         | BLEOMYCIN                 | chembl:CHEMBL403664  | 10.05  |
| LIG3      | 3980 PharmGKB                   | cyclophosphacyclophosphamide               | CYCLOPHOSPHAMIDE          | chembl:CHEMBL88      | 0.81   |
| LILRA4    | 23547 GuideToPharmacantibody    | 315661209 ANTI-ILT7 ANTIBODY               |                           |                      |        |
| LIMK1     | 3984 DTC                        | PAZOPANIBPAZOPANIB                         | PAZOPANIB                 | chembl:CHEMBL477772  | 0.07   |
| LIMK2     | 3985 GuideToPharmacinhibitor    | 249565831 COMPOUND 14 [PMID: 19831390]     |                           |                      |        |
| LINC00251 | 552859 PharmGKB                 | vincristine vincristine                    | VINCRIStINE               | chembl:CHEMBL90555   | 0.22   |
| LINGO1    | 84894 GuideToPharmacantibody    | 310264704 OPICINUMAB                       | OPICINUMAB                | chembl:CHEMBL3544922 | 190.95 |
| LIPA      | 3988 NCI                        | TRIFLUOPE TRIFLUOPERAZINE                  | TRIFLUOPERAZINE           | chembl:CHEMBL422     | 0.91   |
| LIPC      | 3990 NCI                        | ETHANOL ETHANOL                            | ALCOHOL                   | chembl:CHEMBL545     | 0.21   |
| LIPE      | 3991 GuideToPharmacinhibitor    | 178103313 COMPOUND 41 [PMID: 15026062]     |                           |                      |        |

|          |                          |                   |                              |                             |                      |        |
|----------|--------------------------|-------------------|------------------------------|-----------------------------|----------------------|--------|
| LIPF     | 8513 TdgClinicalTrial    | GT 389-255        | GT 389-255                   |                             |                      |        |
| LIPG     | 9388 TTD                 | GSK-264220        | GSK-264220A                  |                             |                      |        |
| LKAAEAR1 | 198437 PharmGKB          | opioids           | opioids                      |                             |                      |        |
| LMNA     | 4000 DTC                 | HISTAMINE         | HISTAMINE                    | HISTAMINE                   | chembl:CHEMBL90      | 2.89   |
| LMO2     | 4005 NCI                 | LITHIUM           | LITHIUM                      | LITHIUM                     | chembl:CHEMBL2146126 | 2.77   |
| LNPEP    | 4012 TTD                 | US10059720        | US10059720, Example 82       |                             |                      |        |
| LOH19CR1 | 8378 NCI                 | PREDNISOL         | PREDNISOLONE                 | PREDNISOLONE                | chembl:CHEMBL131     | 0.98   |
| LOX      | 4015 GuideToPharmac      | inhibitor         | 385612244                    | CCT365623                   |                      |        |
| LOXL2    | 4017 TTD                 | GS-6624           | GS-6624                      | SIMTUZUMAB                  | chembl:CHEMBL2109667 | 190.95 |
| LPA      | 4018 PharmGKB            | hmg coa reductase | hmg coa reductase inhibitors |                             |                      |        |
| LPAR1    | 1902 GuideToPharmac      | antagonist        | 252166789                    | ONO-3080573                 |                      |        |
| LPAR2    | 9170 GuideToPharmac      | antagonist        | 135650457                    | KI16425                     |                      |        |
| LPAR3    | 23566 GuideToPharmac     | antagonist        | 178102101                    | VPC32179                    |                      |        |
| LPAR4    | 2846 GuideToPharmac      | antagonist        | 135649931                    | AM966                       |                      |        |
| LPAR5    | 57121 GuideToPharmac     | antagonist        | 329968439                    | TCLPA5                      |                      |        |
| LPAR6    | 10161 TdgClinicalTrial   | MC-1              | MC-1                         |                             |                      |        |
| LPIN1    | 23175 PharmGKB           | rosiglitazone     | rosiglitazone                | ROSIGLITAZONE               | chembl:CHEMBL121     | 4.9    |
| LPL      | 4023 NCI                 | INSULIN           | INSULIN                      | INSULIN                     | chembl:CHEMBL1201631 | 0.21   |
| LPO      | 4025 NCI                 | DEXTRAN           | DEXTRAN SULFATE              | SODIUM                      |                      |        |
| LRMDA    | 83938 PharmGKB           | tamoxifen         | tamoxifen                    | TAMOXIFEN                   | chembl:CHEMBL83      | 2.16   |
| LRP1     | 4035 NCI                 | ANTISENSE         | ANTISENSE OLIGONUCLEOTIDES   |                             |                      |        |
| LRP1B    | 53353 CIViC              | DOXORUBIN         | DOXORUBICIN                  | DOXORUBICIN                 | chembl:CHEMBL53463   | 1.35   |
| LRP2     | 4036 PharmGKB            | cisplatin         | cisplatin                    | CISPLATIN                   | chembl:CHEMBL11359   | 1.76   |
| LRRC15   | 131578 PharmGKB          | metoprolol        | metoprolol                   | METOPROLOL                  | chembl:CHEMBL13      | 2.65   |
| LRRC59   | 55379 DTC                | MELAGATRAN        | MELAGATRAN                   | MELAGATRAN                  | chembl:CHEMBL266349  | 21.22  |
| LRRK2    | 120892 DTC               | AZD-1775          | AZD-1775                     | ADAVOSERTIB                 | chembl:CHEMBL1976040 | 0.09   |
| LSS      | 4047 GuideToPharmac      | inhibitor         | 178103329                    | COMPOUND 9 [PMID: 22533316] |                      |        |
| LST1     | 7940 PharmGKB            | abacavir          | abacavir                     | ABACAVIR                    | chembl:CHEMBL1380    | 5.79   |
| LTA      | 4049 PharmGKB            | carbamazepir      | carbamazepine                | CARBAMAZEPINE               | chembl:CHEMBL108     | 0.68   |
| LTA4H    | 4048 NCI                 | ANTIINFLAM        | ANTIINFLAMMATORY AGENTS      |                             |                      |        |
| LTB      | 4050 PharmGKB            | abacavir          | abacavir                     | ABACAVIR                    | chembl:CHEMBL1380    | 2.89   |
| LTB4R    | 1241 ChemblInteractio    | antagonist        | CHEMBL174                    | AMELUBANT                   | chembl:CHEMBL1742420 | 38.19  |
| LTB4R2   | 56413 GuideToPharmac     | antagonist        | 178100381                    | LY255283                    |                      |        |
| LTBR     | 4055 GuideToPharmacology |                   | 178101763                    | LIGHT                       |                      |        |
| LTC4S    | 4056 GuideToPharmac      | inhibitor         | 385612238                    | AZD9898                     |                      |        |
| LTF      | 4057 NCI                 | BACITRACIN        | BACITRACIN                   | BACITRACIN                  | chembl:CHEMBL1200558 | 10.61  |
| LTK      | 4058 DTC                 | PAZOPANIB         | PAZOPANIB                    | PAZOPANIB                   | chembl:CHEMBL477772  | 0.06   |
| LUM      | 4060 NCI                 | FAS LIGANIFAS     | LIGAND                       |                             |                      |        |
| LVRN     | 206338 ChemblInteractio  | inhibitor         | CHEMBL21                     | TOSEDOSTAT                  | chembl:CHEMBL2103847 | 3.35   |
| LY96     | 23643 ChemblInteractio   | antagonist        | CHEMBL33                     | ERITORAN TETRASODIUM        | chembl:CHEMBL3301672 | 31.83  |
| LYN      | 4067 DTC                 | CYC-116           | CYC-116                      | CYC-116                     | chembl:CHEMBL482967  | 0.02   |
| LYVE1    | 10894 TTD                | Hyaluronate       | sHyaluronate sodium          |                             |                      |        |

|         |                                |               |                                                    |                |                      |       |
|---------|--------------------------------|---------------|----------------------------------------------------|----------------|----------------------|-------|
| M6PR    | 4074 TTD                       | Alglucosidas  | Alglucosidase alfa                                 |                |                      |       |
| MAD1L1  | 8379 PharmGKB                  | carboplatin   | carboplatin                                        | CARBOPLATIN    | chembl:CHEMBL1351    | 0.81  |
| MADCAM1 | 8174 ChEMBLInteraction         | inhibitor     | CHEMBL21(PF-00547659)                              | ONTAMALIMAB    | chembl:CHEMBL2109511 | 63.65 |
| MAFB    | 9935 PharmGKB                  | Tumor necros  | Tumor necrosis factor alpha (TNF-alpha) inhibitors |                |                      |       |
| MAFK    | 7975 PharmGKB                  | isoniazid     | isoniazid                                          | ISONIAZID      | chembl:CHEMBL64      | 14.69 |
| MAG     | 4099 TTD                       | GSK249320     | GSK249320                                          | REFANEZUMAB    | chembl:CHEMBL3545317 | 31.83 |
| MAGEA1  | 4100 NCI                       | ARA-C         | ARA-C                                              |                |                      |       |
| MAGEA12 | 4111 TALC                      | vaccine       | MAGE-12 PIMAGE-12 PEPTIDE VACCINE                  |                |                      |       |
| MAGEA3  | 4102 TTD                       | Astuprotimut  | Astuprotimut-R                                     | ASTUPROTIMUT-R | chembl:CHEMBL2108705 | 95.48 |
| MAGEA4  | 4103 TTD                       | CAR-T cells   | CAR-T cells targeting MAGE-A4                      |                |                      |       |
| MAGEC1  | 9947 TTD                       | CV-9201       | CV-9201                                            |                |                      |       |
| MAGEC2  | 51438 TTD                      | CV-9201       | CV-9201                                            |                |                      |       |
| MALAT1  | 378938 TTD                     | Cilobradine   | Cilobradine                                        | CILOBRADINE    | chembl:CHEMBL1436376 | 4.24  |
| MALT1   | 10892 GuideToPharmac           | inhibitor     | 354702255 PECAZINE                                 | MEPAZINE       | chembl:CHEMBL395110  | 63.65 |
| MAN2C1  | 4123 TTD                       | M-0011        | M-0011                                             |                |                      |       |
| MAOA    | 4128 TTD                       | Cyclic peptid | Cyclic peptide derivative 1                        |                |                      |       |
| MAOB    | 4129 TdgClinicalTrial          | PHENELZIN     | PHENELZINE                                         | PHENELZINE     | chembl:CHEMBL1089    | 1.25  |
| MAP2    | 4133 NCI                       | MELATONIN     | MELATONIN                                          | MELATONIN      | chembl:CHEMBL45      | 2.36  |
| MAP2K1  | 5604 ClarityFoundationClinical | SELUMETIN     | SELUMETINIB                                        | SELUMETINIB    | chembl:CHEMBL1614701 | 0.87  |
| MAP2K2  | 5605 ChEMBLInteraction         | inhibitor     | CHEMBL21:Refametinib                               | REFAMETINIB    | chembl:CHEMBL1236682 | 0.67  |
| MAP2K3  | 5606 MyCancerGenom             | inhibitor     | TRAMETINITRAMETINIB                                | TRAMETINIB     | chembl:CHEMBL2103875 | 0.25  |
| MAP2K4  | 6416 MyCancerGenom             | inhibitor     | TRAMETINITRAMETINIB                                | TRAMETINIB     | chembl:CHEMBL2103875 | 0.22  |
| MAP2K5  | 5607 MyCancerGenom             | inhibitor     | AZD6244 AZD6244                                    | SELUMETINIB    | chembl:CHEMBL1614701 | 0.36  |
| MAP2K6  | 5608 MyCancerGenom             | inhibitor     | TRAMETINITRAMETINIB                                | TRAMETINIB     | chembl:CHEMBL2103875 | 0.22  |
| MAP2K7  | 5609 MyCancerGenom             | inhibitor     | GDC-0973 GDC-0973                                  | COBIMETINIB    | chembl:CHEMBL2146883 | 2.27  |
| MAP3K1  | 4214 PharmGKB                  | cisplatin     | cisplatin                                          | CISPLATIN      | chembl:CHEMBL11359   | 0.11  |
| MAP3K10 | 4294 DTC                       | DOVITINIB     | DOVITINIB                                          | DOVITINIB      | chembl:CHEMBL522892  | 0.12  |
| MAP3K11 | 4296 GuideToPharmac            | inhibitor     | 249565853 CEP-1347                                 | CEP-1347       | chembl:CHEMBL290352  | 28.29 |
| MAP3K12 | 7786 GuideToPharmac            | inhibitor     | 374883875 COMPOUND 16D [TAO ET AL., 2009]          |                |                      |       |
| MAP3K13 | 9175 ChEMBLInteraction         | inhibitor     | CHEMBL29(CEP-1347)                                 | CEP-1347       | chembl:CHEMBL290352  | 7.07  |
| MAP3K14 | 9020 GuideToPharmac            | inhibitor     | 374883851 NIK SMII                                 |                |                      |       |
| MAP3K19 | 80122 GuideToPharmac           | inhibitor     | 249565898 COMPOUND 1 [PMID: 24793884]              |                |                      |       |
| MAP3K2  | 10746 TTD                      | CI-1040       | CI-1040                                            | CI-1040        | chembl:CHEMBL105442  | 2.77  |
| MAP3K20 | 51776 DTC                      | CYC-116       | CYC-116                                            | CYC-116        | chembl:CHEMBL482967  | 0.04  |
| MAP3K3  | 4215 GuideToPharmac            | inhibitor     | 249565888 COMPOUND 5N [PMID: 20483621]             |                |                      |       |
| MAP3K5  | 4217 TTD                       | GS-4997       | GS-4997                                            | SELONSERTIB    | chembl:CHEMBL3916717 | 95.48 |
| MAP3K6  | 9064 GuideToPharmac            | inhibitor     | 249565813 COMPOUND 10 [PMID: 23147077]             |                |                      |       |
| MAP3K7  | 6885 GuideToPharmac            | inhibitor     | 329968393 COMPOUND 12 [PMID: 27448772]             |                |                      |       |
| MAP3K8  | 1326 GuideToPharmac            | inhibitor     | 178102629 MEK INHIBITOR II                         |                |                      |       |
| MAP3K9  | 4293 ChEMBLInteraction         | inhibitor     | CHEMBL29(CEP-1347)                                 | CEP-1347       | chembl:CHEMBL290352  | 3.54  |
| MAP4K2  | 5871 GuideToPharmac            | inhibitor     | 249565754 NG-25                                    |                |                      |       |
| MAP4K3  | 8491 GuideToPharmac            | inhibitor     | 384403668 RIPK3 INHIBITOR 18                       |                |                      |       |

|          |                       |              |                                  |                      |                      |                      |      |
|----------|-----------------------|--------------|----------------------------------|----------------------|----------------------|----------------------|------|
| MAP4K4   | 9448 DTC              | CYC-116      | CYC-116                          | CYC-116              | chembl:CHEMBL482967  | 0.02                 |      |
| MAP4K5   | 11183 DTC             | CYC-116      | CYC-116                          | CYC-116              | chembl:CHEMBL482967  | 0.02                 |      |
| MAPK1    | 5594 DTC              | PROGESTE     | PROGESTERONE                     | PROGESTERONE         | chembl:CHEMBL103     | 0.01                 |      |
| MAPK10   | 5602 DTC              | DORAMAPI     | DORAMAPIMOD                      | DORAMAPIMOD          | chembl:CHEMBL103667  | 0.1                  |      |
| MAPK11   | 5600 PharmGKB         | sorafenib    | sorafenib                        | SORAFENIB            | chembl:CHEMBL1336    | 0.06                 |      |
| MAPK12   | 6300 DTC              | SB-202190    | SB-202190                        | SB-202190            | chembl:CHEMBL278041  | 0.14                 |      |
| MAPK13   | 5603 DTC              | OPHIOBOLI    | OPHIOBOLIN O                     | OPHIOBOLIN O         | chembl:CHEMBL1934283 | 0.88                 |      |
| MAPK14   | 1432 DTC              | SORAFENIB    | SORAFENIB                        | SORAFENIB            | chembl:CHEMBL1336    | 0.03                 |      |
| MAPK15   | 225689 GuideToPharmac | inhibitor    | 249565856 BS-194                 |                      |                      |                      |      |
| MAPK3    | 5595 DTC              | (+)-ISOBICY  | (+)-ISOBICYCLOGERMACI            | CHEMBL2333548        | chembl:CHEMBL2333548 | 0.8                  |      |
| MAPK4    | 5596 PharmGKB         | sorafenib    | sorafenib                        | SORAFENIB            | chembl:CHEMBL1336    | 1.53                 |      |
| MAPK6    | 5597 PharmGKB         | sorafenib    | sorafenib                        | SORAFENIB            | chembl:CHEMBL1336    | 1.53                 |      |
| MAPK7    | 5598 TdgClinicalTrial | TG02, SB131  | TG02, SB131                      |                      |                      |                      |      |
| MAPK8    | 5599 DTC              | JNJ-7706621  | JNJ-7706621                      | JNJ-7706621          | chembl:CHEMBL191003  | 0.03                 |      |
| MAPK9    | 5601 NCI              | CAMPTOTH     | CAMPTOTHECIN                     | CAMPTOTHECIN         | chembl:CHEMBL65      | 0.11                 |      |
| MAPKAP1  | 79109 MyCancerGenom   | inhibitor    | OSI-027                          | OSI-027              | OSI-027              | chembl:CHEMBL3120215 | 2.12 |
| MAPKAP2  | 9261 GuideToPharmac   | inhibitor    | 249565843 COMPOUND 33            | [PMID: 19364658]     |                      |                      |      |
| MAPKAPK3 | 7867 GuideToPharmac   | inhibitor    | 249565857 COMPOUND 16            | [PMID: 17480064]     |                      |                      |      |
| MAPKAPK5 | 8550 GuideToPharmac   | inhibitor    | 363894142 GALAPAGOS              | MAPKAPK5 INHIBITOR D |                      |                      |      |
| MAPT     | 4137 DTC              | DIHYDROX.    | DIHYDROXANTHOHUMO                | DIHYDROXANTHOHUMOL   | chembl:CHEMBL510279  | 0.02                 |      |
| MARCHF8  | 220972 TTD            | Aflunov      | Aflunov                          |                      |                      |                      |      |
| MARCKS   | 4082 TTD              | BIO-11006    | BIO-11006                        | BIO-11006            | chembl:CHEMBL4297701 | 63.65                |      |
| MARCKSL1 | 65108 NCI             | IFN          | IFN                              |                      |                      |                      |      |
| MARK1    | 4139 GuideToPharmac   | inhibitor    | 249565590 7-HYDROXYSTA           | UROSPOICHEMBL1236539 | chembl:CHEMBL1236539 | 2.45                 |      |
| MARK2    | 2011 DTC              | TOZASERTI    | TOZASERTIB                       | TOZASERTIB           | chembl:CHEMBL572878  | 0.05                 |      |
| MARK3    | 4140 DTC              | ALSTERPAU    | ALSTERPAULLONE                   | ALSTERPAULLONE       | chembl:CHEMBL50894   | 0.06                 |      |
| MARK4    | 57787 DTC             | JNJ-7706621  | JNJ-7706621                      | JNJ-7706621          | chembl:CHEMBL191003  | 0.2                  |      |
| MAS1     | 4142 TTD              | Angiotensin- | (Angiotensin-(1-7))              |                      |                      |                      |      |
| MASP2    | 10747 TTD             | OMS721       | OMS721                           | NARSOPLIMAB          | chembl:CHEMBL4298195 | 63.65                |      |
| MAST3    | 23031 GuideToPharmac  | inhibitor    | 252827499 COMPOUND 35            | [PMID: 23916259]     |                      |                      |      |
| MAT1A    | 4143 NCI              | ANTISENSE    | ANTISENSE OLIGONUCLEOTIDES       |                      |                      |                      |      |
| MAT2A    | 4144 TTD              | AG-270       | AG-270                           |                      |                      |                      |      |
| MATK     | 4145 DTC              | SP-600125    | SP-600125                        | SP-600125            | chembl:CHEMBL1725279 | 0.18                 |      |
| MAZ      | 4150 NCI              | IL-1         | IL-1                             |                      |                      |                      |      |
| MBD4     | 8930 CIViC            | PD1 INHIBIT  | PD1 INHIBITOR                    |                      |                      |                      |      |
| MBL2     | 4153 NCI              | DANAZOL      | DANAZOL                          | DANAZOL              | chembl:CHEMBL1479    | 7.96                 |      |
| MBNL1    | 4154 DTC              | MITOXANT.    | MITOXANTRONE                     | MITOXANTRONE         | chembl:CHEMBL58      | 0.13                 |      |
| MBOAT4   | 619373 TTD            | PMID254706   | PMID25470667-Compound-GO-CoA-Tat |                      |                      |                      |      |
| MBP      | 4155 NCI              | BIOFLAVON    | BIOFLAVONOID                     |                      |                      |                      |      |
| MBTPS1   | 8720 GuideToPharmac   | inhibitor    | 252827485 COMPOUND 7B            | [PMID: 17583500]     |                      |                      |      |
| MC1R     | 4157 GuideToPharmac   | agonist      | 135652303 MS05                   |                      |                      |                      |      |
| MC2R     | 4158 GuideToPharmac   | antagonist   | 135652000 ASIP [90-132 (L89Y)]   |                      |                      |                      |      |

|          |           |                           |               |                                          |                         |  |                      |       |
|----------|-----------|---------------------------|---------------|------------------------------------------|-------------------------|--|----------------------|-------|
| MC3R     | 4159      | GuideToPharmacagonist     | 135651755     | Γ-MSH                                    |                         |  |                      |       |
| MC4R     | 4160      | GuideToPharmacagonist     | 387271628     | BREMELANOTIDE                            | BREMELANOTIDE           |  | chembl:CHEMBL2070241 | 2.83  |
| MC5R     | 4161      | TTD                       | MTC-896       | MTC-896                                  |                         |  |                      |       |
| MCAM     | 4162      | GuideToPharmacantibody    | 354702277     | IMAPRELIMAB                              |                         |  |                      |       |
| MCHR1    | 2847      | GuideToPharmacagonist     | 135651969     | AC-HMCH-(6-16)-NH2                       |                         |  |                      |       |
| MCHR2    | 84539     | GuideToPharmacagonist     | 135652447     | MCH (SALMON)                             |                         |  |                      |       |
| MCL1     | 4170      | TTD                       | PMID277447    | PMID27744724-Compound-13                 |                         |  |                      |       |
| MCM8     | 84515     | TTD                       | BT-063        | BT-063                                   |                         |  |                      |       |
| MCOLN1   | 57192     | PharmGKB                  | opioids       | opioids                                  |                         |  |                      |       |
| MCOLN2   | 255231    | GuideToPharmacactivator   | 178100233     | PHOSPHATIDYL (3,5) INOSITOL BISPHOSPHATE |                         |  |                      |       |
| MCOLN3   | 55283     | GuideToPharmacactivator   | 178100233     | PHOSPHATIDYL (3,5) INOSITOL BISPHOSPHATE |                         |  |                      |       |
| MDGA2    | 161357    | PharmGKB                  | paroxetine    | paroxetine                               | PAROXETINE              |  | chembl:CHEMBL490     | 1.7   |
| MDH2     | 4191      | NCI                       | ALBUMIN       | ALBUMIN                                  | ALBUMIN HUMAN           |  | chembl:CHEMBL1201451 | 4.24  |
| MDK      | 4192      | NCI                       | RETINOIC      | ARETINOIC ACID                           |                         |  |                      |       |
| MDM2     | 4193      | TTD                       | RG7388        | RG7388                                   | IDASANUTLIN             |  | chembl:CHEMBL2402737 | 3.98  |
| MDM4     | 4194      | CIViC                     | NIVOLUMA      | NIVOLUMAB                                | NIVOLUMAB               |  | chembl:CHEMBL2108738 | 1.7   |
| ME3      | 10873     | NCI                       | DHT           | DHT                                      | ANDROSTANOLONE          |  | wikidata:Q31686490   | 1.11  |
| MED12L   | 116931    | PharmGKB                  | cytarabine    | cytarabine                               | CYTARABINE              |  | chembl:CHEMBL803     | 2.96  |
| MED19    | 219541    | PharmGKB                  | ethanol       | ethanol                                  | ALCOHOL                 |  | chembl:CHEMBL545     | 1.48  |
| MEG3     | 55384     | PharmGKB                  | Platinum con  | Platinum compounds                       |                         |  |                      |       |
| MEGF11   | 84465     | PharmGKB                  | fluorouracil  | fluorouracil                             | FLUOROURACIL            |  | chembl:CHEMBL185     | 1.21  |
| MELK     | 9833      | DTC                       | TAE-684       | TAE-684                                  | TAE-684                 |  | chembl:CHEMBL509032  | 0.04  |
| MEN1     | 4221      | DTC                       | CHLORHEX      | CHLORHEXIDINE HYDRO                      | CHLORHEXIDINE HYDROCHLO |  | chembl:CHEMBL1484251 | 0.33  |
| MERTK    | 10461     | GuideToPharmacinhibitor   | 381118841     | UNC4203                                  |                         |  |                      |       |
| MET      | 4233      | TTD                       | CBT-101       | CBT-101                                  |                         |  |                      |       |
| METAP1   | 23173     | ChemblInteractioinhibitor | CHEMBL21      | (TOSEDOSTAT                              | TOSEDOSTAT              |  | chembl:CHEMBL2103847 | 3.35  |
| METAP1D  | 254042    | ChemblInteractioinhibitor | CHEMBL21      | (TOSEDOSTAT                              | TOSEDOSTAT              |  | chembl:CHEMBL2103847 | 3.35  |
| METAP2   | 10988     | TTD                       | PPI-2458      | PPI-2458                                 | PPI-2458                |  | chembl:CHEMBL3527358 | 42.43 |
| METTL21A | 151194    | PharmGKB                  | antidepressan | antidepressants                          |                         |  |                      |       |
| MEX3C    | 51320     | PharmGKB                  | Bisphosphon   | Bisphosphonates                          |                         |  |                      |       |
| MFGE8    | 4240      | TdgClinicalTrial          | TRIAB         | TRIAB                                    |                         |  |                      |       |
| MGA      | 23269     | ChemblInteractioinhibitor | CHEMBL15      | (MIGLITOL                                | MIGLITOL                |  | chembl:CHEMBL1561    | 10.61 |
| MGAM     | 8972      | DTC                       | BAICALEIN     | BAICALEIN                                | BAICALEIN               |  | chembl:CHEMBL8260    | 0.51  |
| MGAT2    | 4247      | TTD                       | Phenylmetha   | Phenylmethanesulfonamide derivative 1    |                         |  |                      |       |
| MGAT4A   | 11320     | PharmGKB                  | bevacizumab   | bevacizumab                              | BEVACIZUMAB             |  | chembl:CHEMBL1201583 | 1.03  |
| MGLL     | 11343     | GuideToPharmacinhibitor   | 252166807     | JZL195                                   |                         |  |                      |       |
| MGMT     | 4255      | NCI                       | CHLORAME      | CHLORAMBUCIL                             | CHLORAMBUCIL            |  | chembl:CHEMBL515     | 0.56  |
| MIA      | 8190      | NCI                       | TGFBETA1      | TGFBETA1                                 |                         |  |                      |       |
| MICA     | 100507436 | NCI                       | HSP70         | HSP70                                    |                         |  |                      |       |
| MICB     | 4277      | PharmGKB                  | peginterferon | peginterferon alfa-2a                    |                         |  |                      |       |
| MICU1    | 10367     | TTD                       | ALD-403       | ALD-403                                  | EPTINEZUMAB             |  | chembl:CHEMBL3833320 | 15.91 |
| MID1     | 4281      | TTD                       | SUN-N8075     | SUN-N8075                                |                         |  |                      |       |

|          |                                 |                                                                |                    |                      |        |
|----------|---------------------------------|----------------------------------------------------------------|--------------------|----------------------|--------|
| MIEF2    | 125170 PharmGKB                 | duloxetine duloxetine                                          | DULOXETINE         | chembl:CHEMBL1175    | 6.37   |
| MIF      | 4282 TdgClinicalTrial           | ANTI-MIF MANTI-MIF MONOCLONAL ANTIBODY                         |                    |                      |        |
| MINK1    | 50488 DTC                       | BAY-613606BAY-613606                                           | CHEMBL541400       | chembl:CHEMBL541400  | 0.06   |
| MIP      | 4284 GuideToPharmacinhibitor    | 178101032 HG2+                                                 |                    |                      |        |
| MIR125B2 | 406912 NCI                      | STEROID H(STEROID HORMONE                                      |                    |                      |        |
| MIR155   | 406947 TTD                      | MRG-201 MRG-201                                                |                    |                      |        |
| MIR2054  | 100302267 PharmGKB              | capecitabine capecitabine                                      | CAPECITABINE       | chembl:CHEMBL1773    | 1.77   |
| MIR21    | 406991 CIViC                    | CISPLATIN CISPLATIN                                            | CISPLATIN          | chembl:CHEMBL11359   | 0.88   |
| MIR27A   | 407018 PharmGKB                 | capecitabine capecitabine                                      | CAPECITABINE       | chembl:CHEMBL1773    | 4.42   |
| MIR582   | 693167 PharmGKB                 | quetiapine quetiapine                                          | QUETIAPINE         | chembl:CHEMBL716     | 2.05   |
| MITF     | 4286 DTC                        | CID 1540545CID 1540545                                         | CHEMBL259784       | chembl:CHEMBL259784  | 0.2    |
| MKNK1    | 8569 DTC                        | CGP-57380 CGP-57380                                            | CHEMBL1240885      | chembl:CHEMBL1240885 | 42.43  |
| MKNK2    | 2872 DTC                        | SORAFENIBSORAFENIB                                             | SORAFENIB          | chembl:CHEMBL1336    | 0.05   |
| MLANA    | 2315 NCI                        | CANCER V/CANCER VACCINES                                       |                    |                      |        |
| MLC1     | 23209 ChemblInteractioactivator | CHEMBL18(OMECAMTIV MECARBIL                                    | OMECAMTIV MECARBIL | chembl:CHEMBL1800955 | 9.09   |
| MLH1     | 4292 JAX-CKB                    | KU60648 KU60648                                                |                    |                      |        |
| MLKL     | 197259 GuideToPharmacinhibitor  | 336446900 MLKL COMPOUND 1                                      |                    |                      |        |
| MLLT3    | 4300 PharmGKB                   | cisplatin cisplatin                                            | CISPLATIN          | chembl:CHEMBL11359   | 0.44   |
| MLNR     | 2862 TTD                        | RWJ-68023 RWJ-68023                                            |                    |                      |        |
| MLST8    | 64223 MyCancerGenoninhibitor    | AZD8055 AZD8055                                                | AZD-8055           | chembl:CHEMBL1801204 | 1.41   |
| MLYCD    | 23417 GuideToPharmacinhibitor   | 252827437 COMPOUND 10H [PMID: 20832306]                        |                    |                      |        |
| MME      | 4311 GuideToPharmacinhibitor    | 178103105 CANDOXATRILAT                                        | CANDOXATRILAT      | chembl:CHEMBL434492  | 14.69  |
| MMP1     | 4312 TTD                        | PMID291303PMID29130358-Compound-Figure18(14a)                  |                    |                      |        |
| MMP10    | 4319 GuideToPharmacinhibitor    | 249565939 CM-352                                               |                    |                      |        |
| MMP11    | 4320 GuideToPharmacinhibitor    | 252166865 COMPOUND 10 [PMID: 18790648]                         |                    |                      |        |
| MMP12    | 4321 TTD                        | PMID291303PMID29130358-Compound-Figure17(12)                   |                    |                      |        |
| MMP13    | 4322 GuideToPharmacinhibitor    | 178103096 APRATASTAT                                           | APRATASTAT         | chembl:CHEMBL206815  | 6.06   |
| MMP14    | 4323 GuideToPharmacinhibitor    | 252166779 COMPOUND 29E [PMID: 23631440]                        |                    |                      |        |
| MMP15    | 4324 GuideToPharmacinhibitor    | 252166829 SL422                                                |                    |                      |        |
| MMP16    | 4325 GuideToPharmacinhibitor    | 252166829 SL422                                                |                    |                      |        |
| MMP17    | 4326 GuideToPharmacinhibitor    | 178103981 ILOMASTAT                                            | ILOMASTAT          | chembl:CHEMBL19611   | 4.9    |
| MMP2     | 4313 GuideToPharmacinhibitor    | 178101832 ARP100                                               |                    |                      |        |
| MMP21    | 118856 TTD                      | GM6001 GM6001                                                  |                    |                      |        |
| MMP25    | 64386 GuideToPharmacinhibitor   | 252827503 CGS-27023A                                           | CGS-27023A         | chembl:CHEMBL514138  | 7.96   |
| MMP26    | 56547 GuideToPharmacinhibitor   | 178103981 ILOMASTAT                                            | ILOMASTAT          | chembl:CHEMBL19611   | 4.9    |
| MMP3     | 4314 DTC                        | BERKELEY,BERKELEYACETAL A                                      | BERKELEYACETAL A   | chembl:CHEMBL252920  | 4.24   |
| MMP7     | 4316 GuideToPharmacinhibitor    | 252166768 RS 39066                                             |                    |                      |        |
| MMP8     | 4317 TTD                        | GM6001 GM6001                                                  |                    |                      |        |
| MMP9     | 4318 PharmGKB                   | celecoxib celecoxib                                            | CELECOXIB          | chembl:CHEMBL118     | 0.13   |
| MMUT     | 4594 TTD                        | HydroxocobaHydroxocobalamin                                    | HYDROXOCOBALAMIN   | chembl:CHEMBL2103737 | 222.78 |
| MOB3B    | 79817 PharmGKB                  | Tumor necrosTumor necrosis factor alpha (TNF-alpha) inhibitors |                    |                      |        |
| MOBP     | 4336 PharmGKB                   | creatine creatine                                              | CREATINE           | chembl:CHEMBL283800  | 127.3  |

|          |                       |                                                   |                         |              |                      |        |
|----------|-----------------------|---------------------------------------------------|-------------------------|--------------|----------------------|--------|
| MOCS1    | 4337 TTD              | ALXN1101 ALXN1101                                 |                         |              |                      |        |
| MPHOSPH8 | 54737 DTC             | SB-224289 SB-224289                               | SB-224289               |              | chembl:CHEMBL281350  | 0.08   |
| MPI      | 4351 DTC              | GNF-PF-513-GNF-PF-5134                            |                         | CHEMBL602969 | chembl:CHEMBL602969  | 0.48   |
| MPL      | 4352 ChEMBLInteractio | agonist CHEMBL12(ROMIPILOSTIM                     | ROMIPILOSTIM            |              | chembl:CHEMBL1201832 | 4.34   |
| MPO      | 4353 TTD              | AZD-3241 AZD-3241                                 |                         |              |                      |        |
| MPST     | 4357 GuideToPharmac   | inhibitor 381744892 B3MT-3                        |                         |              |                      |        |
| MR1      | 3140 TdgClinicalTrial | ANTITHYMANTITHYMOCYTE GLOBULIN                    |                         |              |                      |        |
| MRGPRD   | 116512 GuideToPharmac | agonist 135651448 B-ALANINE                       |                         |              |                      |        |
| MRGPRX1  | 259249 GuideToPharmac | agonist 178102177 CHLOROQUINE                     | CHLOROQUINE             |              | chembl:CHEMBL76      | 5.3    |
| MRGPRX2  | 117194 GuideToPharmac | agonist 135651697 CORTISTATIN-14                  | CORTISTATIN-14          |              | chembl:CHEMBL2448526 | 3.54   |
| MRM2     | 29960 TTD             | Plazomicin Plazomicin                             | PLAZOMICIN              |              | chembl:CHEMBL1650559 | 63.65  |
| MS4A1    | 931 TTD               | CAR-T cells CAR-T cells targeting CD20            |                         |              |                      |        |
| MS4A2    | 2206 TdgClinicalTrial | OMALIZUMOMALIZUMAB                                | OMALIZUMAB              |              | chembl:CHEMBL1201589 | 106.09 |
| MSANTD1  | 345222 PharmGKB       | risperidone risperidone                           | RISPERIDONE             |              | chembl:CHEMBL85      | 0.99   |
| MSH2     | 4436 CIViC            | ANTI-PD-1 MANTI-PD-1 MONOCLONAL ANTIBODY MEDI0680 |                         |              |                      |        |
| MSH5     | 4439 PharmGKB         | gemcitabine gemcitabine                           | GEMCITABINE             |              | chembl:CHEMBL888     | 0.79   |
| MSH6     | 2956 JAX-CKB          | temozolomicTemozolomide                           | TEMOZOLOMIDE            |              | chembl:CHEMBL810     | 7.07   |
| MSLN     | 10232 TTD             | RG7882 RG7882                                     |                         |              |                      |        |
| MSMB     | 4477 TTD              | Tigapotide Tigapotide                             | TIGAPOTIDE              |              | chembl:CHEMBL3040192 | 63.65  |
| MSR1     | 4481 NCI              | H2O2 H2O2                                         |                         |              |                      |        |
| MST1     | 4485 NCI              | RETINOIC ARETINOIC ACID                           |                         |              |                      |        |
| MST1R    | 4486 DTC              | ALSTERPAUALSTERPAULLONE                           | ALSTERPAULLONE          |              | chembl:CHEMBL50894   | 0.05   |
| MSTN     | 2660 ChEMBLInteractio | inhibitor CHEMBL35LANDOGROZUMAB                   | LANDOGROZUMAB           |              | chembl:CHEMBL3545072 | 10.61  |
| MT1A     | 4489 PharmGKB         | arsenic trioxidarsenic trioxide                   |                         |              |                      |        |
| MT1E     | 4493 NCI              | NAC NAC                                           | ACETYLCYSTEINE          |              | chembl:CHEMBL600     | 8.49   |
| MT1F     | 4494 NCI              | DEXAMETHDEXAMETHASONE                             | DEXAMETHASONE           |              | chembl:CHEMBL384467  | 0.76   |
| MT1G     | 4495 NCI              | BSO BSO                                           |                         |              |                      |        |
| MT1H     | 4496 NCI              | GLUCOCORGLUCOCORTICOID                            |                         |              |                      |        |
| MT1IP    | 644314 NCI            | BUTYRATE BUTYRATE                                 |                         |              |                      |        |
| MT1JP    | 4498 NCI              | ETHANOL ETHANOL                                   | ALCOHOL                 |              | chembl:CHEMBL545     | 1.48   |
| MT2A     | 4502 NCI              | PARACETAIPARACETAMOL                              | ACETAMINOPHEN           |              | chembl:CHEMBL112     | 1.63   |
| MT3      | 4504 NCI              | IL-6 IL-6                                         |                         |              |                      |        |
| MTAP     | 4507 NCI              | L-ALANOSIL-ALANOSINE                              | ALANOSINE               |              | chembl:CHEMBL452715  | 63.65  |
| MT-CO1   | 4512 NCI              | LEVODOPA LEVODOPA                                 | LEVODOPA                |              | chembl:CHEMBL1009    | 1.72   |
| MT-CO2   | 4513 DTC              | CELECOXIECELECOXIB                                | CELECOXIB               |              | chembl:CHEMBL118     | 1.99   |
| MTF1     | 4520 TdgClinicalTrial | LOR-253 LOR-253                                   | APTO-253                |              | chembl:CHEMBL4297261 | 31.83  |
| MTHFR    | 4524 PharmGKB         | pravastatin pravastatin                           | PRAVASTATIN             |              | chembl:CHEMBL1144    | 0.15   |
| MT-ND1   | 4535 TEND             | SEVOFLURSEVOFLURANE                               | SEVOFLURANE             |              | chembl:CHEMBL1200694 | 1.61   |
| MT-ND2   | 4536 ChEMBLInteractio | inhibitor CHEMBL35NV-128                          | NV-128                  |              | chembl:CHEMBL3545135 | 0.42   |
| MT-ND3   | 4537 TTD              | NADH NADH                                         | CHEMBL1161866           |              | chembl:CHEMBL1161866 | 63.65  |
| MT-ND4   | 4538 ChEMBLInteractio | inhibitor CHEMBL17(METFORMIN HYDROCHL             | METFORMIN HYDROCHLORIDE |              | chembl:CHEMBL1703    | 0.39   |
| MT-ND4L  | 4539 ChEMBLInteractio | inhibitor CHEMBL35NV-128                          | NV-128                  |              | chembl:CHEMBL3545135 | 0.42   |

|         |                          |            |               |                              |                      |                      |      |
|---------|--------------------------|------------|---------------|------------------------------|----------------------|----------------------|------|
| MT-ND5  | 4540 ChemblInteractio    | inhibitor  | CHEMBL354     | ME-344                       | chembl:CHEMBL3545320 | 0.42                 |      |
| MT-ND6  | 4541 ChemblInteractio    | inhibitor  | CHEMBL354     | NV-128                       | chembl:CHEMBL3545135 | 0.42                 |      |
| MTNR1A  | 4543 GuideToPharmac      | agonist    | 135649834     | 5-HEAT                       |                      |                      |      |
| MTNR1B  | 4544 GuideToPharmac      | antagonist | 135650539     | LUZINDOLE                    | chembl:CHEMBL286615  | 1.52                 |      |
| MTOR    | 2475 DTC                 |            | QUINACRIN     | QUINACRINE                   | chembl:CHEMBL7568    | 0.05                 |      |
| MTR     | 4548 NCI                 |            | ENZYME IN     | ENZYME INHIBITOR             |                      |                      |      |
| MTRF1L  | 54516 PharmGKB           |            | antidepressan | antidepressants              |                      |                      |      |
| MT-RNR1 | 4549 PharmGKB            |            | neomycin      | neomycin                     | chembl:CHEMBL3989751 | 93.36                |      |
| MTRR    | 4552 PharmGKB            |            | folic acid    | folic acid                   |                      |                      |      |
| MTTP    | 4547 TTD                 |            | BMS-201038    | BMS-201038                   | LOMITAPIDE MESYLATE  | chembl:CHEMBL2105662 | 7.96 |
| MUC1    | 4582 TTD                 |            | Anti-MUC1 r   | Anti-MUC1 mab                |                      |                      |      |
| MUC16   | 94025 ChemblInteractions |            | CHEMBL174     | ABAGOVOMAB                   | chembl:CHEMBL1742981 | 23.87                |      |
| MUC2    | 4583 NCI                 |            | 5-FU          | 5-FU                         | chembl:CHEMBL185     | 0.4                  |      |
| MUC5AC  | 4586 ChemblInteractions  |            | CHEMBL174     | ENSITUXIMAB                  | chembl:CHEMBL1743013 | 31.83                |      |
| MUCL3   | 135656 PharmGKB          |            | gemcitabine   | gemcitabine                  | chembl:CHEMBL888     | 0.79                 |      |
| MUSK    | 4593 GuideToPharmac      | inhibitor  | 249565803     | COMPOUND 1D [PMID: 21493067] |                      |                      |      |
| MUTYH   | 4595 PharmGKB            |            | cyclophosphac | cyclophosphamide             | chembl:CHEMBL88      | 0.81                 |      |
| MVD     | 4597 GuideToPharmac      | inhibitor  | 135649848     | 6-FLUOROMEVALONATE           | 5-DIPHOSPHATE        |                      |      |
| MVK     | 4598 GuideToPharmac      | inhibitor  | 135651475     | DIMETHYLALLYL                | DIPHOSPHATE          |                      |      |
| MXI1    | 4601 NCI                 |            | TGFBETA1      | TGFBETA1                     |                      |                      |      |
| MYB     | 4602 NCI                 |            | RETINOID      | RETINOID                     |                      |                      |      |
| MYBPC3  | 4607 TTD                 |            | Omecamtiv n   | Omecamtiv mecarbil           |                      |                      |      |
| MYC     | 4609 ClarityFoundation   | Biomarker  | BAY1000394    | BAY1000394                   |                      |                      |      |
| MYCN    | 4613 PharmGKB            |            | dinutuximab   | dinutuximab                  | chembl:CHEMBL3137342 | 7.07                 |      |
| MYD88   | 4615 JAX-CKB             |            | Ibrutinib     | Ibrutinib                    | chembl:CHEMBL1873475 | 1.66                 |      |
| MYH14   | 79784 TTD                |            | Mavacamten    | Mavacamten                   | chembl:CHEMBL4297517 | 63.65                |      |
| MYH6    | 4624 ChemblInteractio    | activator  | CHEMBL18(     | OMECAMTIV MECARBIL           | chembl:CHEMBL1800955 | 9.09                 |      |
| MYH7    | 4625 ChemblInteractio    | activator  | CHEMBL18(     | OMECAMTIV MECARBIL           | chembl:CHEMBL1800955 | 9.09                 |      |
| MYH7B   | 57644 ChemblInteractio   | activator  | CHEMBL18(     | OMECAMTIV MECARBIL           | chembl:CHEMBL1800955 | 9.09                 |      |
| MYL2    | 4633 ChemblInteractio    | activator  | CHEMBL18(     | OMECAMTIV MECARBIL           | chembl:CHEMBL1800955 | 9.09                 |      |
| MYL3    | 4634 ChemblInteractio    | activator  | CHEMBL18(     | OMECAMTIV MECARBIL           | chembl:CHEMBL1800955 | 9.09                 |      |
| MYL7    | 58498 ChemblInteractio   | activator  | CHEMBL18(     | OMECAMTIV MECARBIL           | chembl:CHEMBL1800955 | 9.09                 |      |
| MYLIP   | 29116 PharmGKB           |            | atorvastatin  | atorvastatin                 | chembl:CHEMBL1487    | 2.12                 |      |
| MYLK    | 4638 DTC                 | inhibitor  | TOZASERTI     | TOZASERTIB                   | chembl:CHEMBL572878  | 1.82                 |      |
| MYLK2   | 85366 GuideToPharmac     | inhibitor  | 178103351     | GSK2606414                   | chembl:CHEMBL2171124 | 31.83                |      |
| MYO1H   | 283446 PharmGKB          |            | lithium       | lithium                      | chembl:CHEMBL2146126 | 2.77                 |      |
| MYO9B   | 4650 NCI                 |            | SALT          | SALT                         | chembl:CHEMBL3544989 | 0.96                 |      |
| MYOD1   | 4654 NCI                 |            | L6            | L6                           |                      |                      |      |
| MYT1L   | 23040 PharmGKB           |            | allopurinol   | allopurinol                  | chembl:CHEMBL1467    | 4.39                 |      |
| N6AMT1  | 29104 PharmGKB           |            | clopidogrel   | clopidogrel                  | chembl:CHEMBL1771    | 3.18                 |      |
| NAAA    | 27163 GuideToPharmac     | inhibitor  | 381118830     | ARN19702                     |                      |                      |      |
| NAE1    | 8883 ChemblInteractio    | inhibitor  | CHEMBL123     | PEVONEDISTAT                 | chembl:CHEMBL1231160 | 15.91                |      |

|          |                         |                                                               |                          |                     |                      |       |
|----------|-------------------------|---------------------------------------------------------------|--------------------------|---------------------|----------------------|-------|
| NAGLU    | 4669 TTD                | N-Acetyl-D-glucosamine                                        |                          |                     |                      |       |
| NAGS     | 162417 PharmGKB         | carglumic acid                                                |                          |                     |                      |       |
| NALCN    | 259232 GuideToPharmac   | 135651305 VERAPAMIL                                           | VERAPAMIL                | VERAPAMIL           | chembl:CHEMBL6966    | 0.8   |
| NAMPT    | 10135 TdgClinicalTrial  | GMX1777 GMX1777                                               |                          | TEGLARINAD CHLORIDE | chembl:CHEMBL190412  | 63.65 |
| NAPEPLD  | 222236 GuideToPharmac   | 405560510 HEXACHLOROPHENE                                     | HEXACHLOROPHENE          | HEXACHLOROPHENE     | chembl:CHEMBL496     | 0.52  |
| NAPRT    | 93100 CIViC             | GNE-617 GNE-617                                               |                          |                     |                      |       |
| NAT1     | 9 ChemblInteractio      | inhibitor CHEMBL12(ORPHENADRINE (CHLORIORPHENADRINE HYDROCHLO |                          |                     | chembl:CHEMBL1201023 | 0.05  |
| NAT2     | 10 NCI                  | ETHANOL ETHANOL                                               | ALCOHOL                  | ALCOHOL             | chembl:CHEMBL545     | 0.08  |
| NBEA     | 26960 PharmGKB          | antidepressan                                                 | antidepressants          |                     |                      |       |
| NBN      | 4683 CIViC              | GPI-15427 GPI-15427                                           |                          |                     |                      |       |
| NCAM1    | 4684 TTD                | CART-56 cel                                                   | CART-56 cells            |                     |                      |       |
| NCF1     | 653361 NCI              | HYDROGEN                                                      | HYDROGEN PEROXIDE        |                     |                      |       |
| NCF2     | 4688 NCI                | PMA PMA                                                       |                          |                     |                      |       |
| NCF4     | 4689 PharmGKB           | doxorubicin doxorubicin                                       | DOXORUBICIN              | DOXORUBICIN         | chembl:CHEMBL53463   | 2.37  |
| NCK1     | 4690 TTD                | AX-024 AX-024                                                 |                          |                     |                      |       |
| NCL      | 4691 TdgClinicalTrial   | AS1411 AS1411                                                 |                          |                     |                      |       |
| NCOA1    | 8648 DTC                | TCMDC-123 TCMDC-123764                                        | CHEMBL533226             |                     | chembl:CHEMBL533226  | 1.22  |
| NCOA2    | 10499 DTC               | METHYLTHMETHYLTHIONINIUM CH                                   | METHYLTHIONINIUM CHLORID |                     | chembl:CHEMBL405110  | 2.65  |
| NCOA3    | 8202 NCI                | TAMOXIFEN                                                     | TAMOXIFEN                | TAMOXIFEN           | chembl:CHEMBL83      | 0.24  |
| NCOR2    | 9612 DTC                | 9,10-PHENA                                                    | 9,10-PHENANTHRENEQUINONE |                     | chembl:CHEMBL51931   | 0.82  |
| NCSTN    | 23385 TALC inhibitor    | MK0752 MK0752                                                 |                          |                     |                      |       |
| NDUFA1   | 4694 ChemblInteractio   | inhibitor CHEMBL17(METFORMIN HYDROCHL                         | METFORMIN HYDROCHLORIDE  |                     | chembl:CHEMBL1703    | 0.39  |
| NDUFA10  | 4705 ChemblInteractio   | inhibitor CHEMBL35<NV-128                                     | NV-128                   | NV-128              | chembl:CHEMBL3545135 | 0.42  |
| NDUFA11  | 126328 ChemblInteractio | inhibitor CHEMBL17(METFORMIN HYDROCHL                         | METFORMIN HYDROCHLORIDE  |                     | chembl:CHEMBL1703    | 0.39  |
| NDUFA12  | 55967 ChemblInteractio  | inhibitor CHEMBL35<NV-128                                     | NV-128                   | NV-128              | chembl:CHEMBL3545135 | 0.42  |
| NDUFA13  | 51079 ChemblInteractio  | inhibitor CHEMBL35<NV-128                                     | NV-128                   | NV-128              | chembl:CHEMBL3545135 | 0.42  |
| NDUFA2   | 4695 ChemblInteractio   | inhibitor CHEMBL35<NV-128                                     | NV-128                   | NV-128              | chembl:CHEMBL3545135 | 0.42  |
| NDUFA3   | 4696 ChemblInteractio   | inhibitor CHEMBL17(METFORMIN HYDROCHL                         | METFORMIN HYDROCHLORIDE  |                     | chembl:CHEMBL1703    | 0.39  |
| NDUFA4   | 4697 ChemblInteractio   | inhibitor CHEMBL35<ME-344                                     | ME-344                   | ME-344              | chembl:CHEMBL3545320 | 0.42  |
| NDUFA4L2 | 56901 ChemblInteractio  | inhibitor CHEMBL35<NV-128                                     | NV-128                   | NV-128              | chembl:CHEMBL3545135 | 0.42  |
| NDUFA5   | 4698 ChemblInteractio   | inhibitor CHEMBL35<ME-344                                     | ME-344                   | ME-344              | chembl:CHEMBL3545320 | 0.42  |
| NDUFA6   | 4700 ChemblInteractio   | inhibitor CHEMBL35<ME-344                                     | ME-344                   | ME-344              | chembl:CHEMBL3545320 | 0.42  |
| NDUFA7   | 4701 ChemblInteractio   | inhibitor CHEMBL35<ME-344                                     | ME-344                   | ME-344              | chembl:CHEMBL3545320 | 0.42  |
| NDUFA8   | 4702 ChemblInteractio   | inhibitor CHEMBL35<NV-128                                     | NV-128                   | NV-128              | chembl:CHEMBL3545135 | 0.42  |
| NDUFA9   | 4704 ChemblInteractio   | inhibitor CHEMBL35<NV-128                                     | NV-128                   | NV-128              | chembl:CHEMBL3545135 | 0.42  |
| NDUFAB1  | 4706 ChemblInteractio   | inhibitor CHEMBL35<ME-344                                     | ME-344                   | ME-344              | chembl:CHEMBL3545320 | 0.42  |
| NDUFAF1  | 51103 ChemblInteractio  | inhibitor CHEMBL35<NV-128                                     | NV-128                   | NV-128              | chembl:CHEMBL3545135 | 0.42  |
| NDUFAF2  | 91942 ChemblInteractio  | inhibitor CHEMBL17(METFORMIN HYDROCHL                         | METFORMIN HYDROCHLORIDE  |                     | chembl:CHEMBL1703    | 0.39  |
| NDUFAF3  | 25915 ChemblInteractio  | inhibitor CHEMBL35<ME-344                                     | ME-344                   | ME-344              | chembl:CHEMBL3545320 | 0.42  |
| NDUFAF4  | 29078 ChemblInteractio  | inhibitor CHEMBL17(METFORMIN HYDROCHL                         | METFORMIN HYDROCHLORIDE  |                     | chembl:CHEMBL1703    | 0.39  |
| NDUFB1   | 4707 ChemblInteractio   | inhibitor CHEMBL35<ME-344                                     | ME-344                   | ME-344              | chembl:CHEMBL3545320 | 0.42  |
| NDUFB10  | 4716 ChemblInteractio   | inhibitor CHEMBL35<ME-344                                     | ME-344                   | ME-344              | chembl:CHEMBL3545320 | 0.42  |

|         |        |                           |                             |                              |                      |                      |
|---------|--------|---------------------------|-----------------------------|------------------------------|----------------------|----------------------|
| NDUFB11 | 54539  | ChemblInteractioinhibitor | CHEMBL354ME-344             | ME-344                       | chembl:CHEMBL3545320 | 0.42                 |
| NDUFB2  | 4708   | ChemblInteractioinhibitor | CHEMBL354NV-128             | NV-128                       | chembl:CHEMBL3545135 | 0.42                 |
| NDUFB3  | 4709   | ChemblInteractioinhibitor | CHEMBL354ME-344             | ME-344                       | chembl:CHEMBL3545320 | 0.42                 |
| NDUFB4  | 4710   | ChemblInteractioinhibitor | CHEMBL354ME-344             | ME-344                       | chembl:CHEMBL3545320 | 0.42                 |
| NDUFB5  | 4711   | ChemblInteractioinhibitor | CHEMBL354ME-344             | ME-344                       | chembl:CHEMBL3545320 | 0.42                 |
| NDUFB6  | 4712   | ChemblInteractioinhibitor | CHEMBL354NV-128             | NV-128                       | chembl:CHEMBL3545135 | 0.42                 |
| NDUFB7  | 4713   | ChemblInteractioinhibitor | CHEMBL17(METFORMIN HYDROCHL | METFORMIN HYDROCHLORIDE      | chembl:CHEMBL1703    | 0.39                 |
| NDUFB8  | 4714   | ChemblInteractioinhibitor | CHEMBL354ME-344             | ME-344                       | chembl:CHEMBL3545320 | 0.42                 |
| NDUFB9  | 4715   | ChemblInteractioinhibitor | CHEMBL354NV-128             | NV-128                       | chembl:CHEMBL3545135 | 0.42                 |
| NDUFC1  | 4717   | ChemblInteractioinhibitor | CHEMBL354ME-344             | ME-344                       | chembl:CHEMBL3545320 | 0.42                 |
| NDUFC2  | 4718   | ChemblInteractioinhibitor | CHEMBL354NV-128             | NV-128                       | chembl:CHEMBL3545135 | 0.42                 |
| NDUFS1  | 4719   | ChemblInteractioinhibitor | CHEMBL17(METFORMIN HYDROCHL | METFORMIN HYDROCHLORIDE      | chembl:CHEMBL1703    | 0.39                 |
| NDUFS2  | 4720   | ChemblInteractioinhibitor | CHEMBL354NV-128             | NV-128                       | chembl:CHEMBL3545135 | 0.42                 |
| NDUFS3  | 4722   | ChemblInteractioinhibitor | CHEMBL354NV-128             | NV-128                       | chembl:CHEMBL3545135 | 0.42                 |
| NDUFS4  | 4724   | ChemblInteractioinhibitor | CHEMBL354ME-344             | ME-344                       | chembl:CHEMBL3545320 | 0.42                 |
| NDUFS5  | 4725   | ChemblInteractioinhibitor | CHEMBL354NV-128             | NV-128                       | chembl:CHEMBL3545135 | 0.42                 |
| NDUFS6  | 4726   | ChemblInteractioinhibitor | CHEMBL354ME-344             | ME-344                       | chembl:CHEMBL3545320 | 0.42                 |
| NDUFS7  | 374291 | ChemblInteractioinhibitor | CHEMBL354ME-344             | ME-344                       | chembl:CHEMBL3545320 | 0.42                 |
| NDUFS8  | 4728   | ChemblInteractioinhibitor | CHEMBL17(METFORMIN HYDROCHL | METFORMIN HYDROCHLORIDE      | chembl:CHEMBL1703    | 0.39                 |
| NDUFV1  | 4723   | ChemblInteractioinhibitor | CHEMBL354NV-128             | NV-128                       | chembl:CHEMBL3545135 | 0.42                 |
| NDUFV2  | 4729   | ChemblInteractioinhibitor | CHEMBL354ME-344             | ME-344                       | chembl:CHEMBL3545320 | 0.42                 |
| NDUFV3  | 4731   | ChemblInteractioinhibitor | CHEMBL17(METFORMIN HYDROCHL | METFORMIN HYDROCHLORIDE      | chembl:CHEMBL1703    | 0.39                 |
| NECTIN4 | 81607  | GuideToPharmacantibody    | 405067331                   | ENFORTUMAB VEDOTIN           |                      |                      |
| NEDD4   | 4734   | PharmGKB                  | warfarin                    | warfarin                     | WARFARIN             | chembl:CHEMBL1464    |
| NEDD4L  | 23327  | PharmGKB                  | diuretics                   | diuretics                    |                      |                      |
| NEDD8   | 4738   | TTD                       | MLN4924                     | MLN4924                      |                      |                      |
| NEK1    | 4750   | GuideToPharmacinhibitor   | 249565860                   | COMPOUND 31 [PMID: 20936789] |                      |                      |
| NEK11   | 79858  | GuideToPharmacinhibitor   | 249565802                   | COMPOUND 25 [PMID: 17935989] |                      |                      |
| NEK2    | 4751   | DTC                       | AZD-1775                    | AZD-1775                     | ADAVOSERTIB          | chembl:CHEMBL1976040 |
| NEK3    | 4752   | GuideToPharmacinhibitor   | 249565802                   | COMPOUND 25 [PMID: 17935989] |                      |                      |
| NEK4    | 6787   | DTC                       | TAMATINI                    | TAMATINIB                    | R-406                | chembl:CHEMBL475251  |
| NEK6    | 10783  | GuideToPharmacinhibitor   | 249565885                   | COMPOUND 22 [PMID: 20462760] |                      |                      |
| NEK7    | 140609 | GuideToPharmacinhibitor   | 249565885                   | COMPOUND 22 [PMID: 20462760] |                      |                      |
| NELFCD  | 51497  | PharmGKB                  | diuretics                   | diuretics                    |                      |                      |
| NEU3    | 10825  | DTC                       | OSELTAMIVIR                 | OSELTAMIVIR                  |                      | chembl:CHEMBL1229    |
| NEUROD1 | 4760   | NCI                       | PD-98059                    | PD-98059                     |                      | chembl:CHEMBL35482   |
| NF1     | 4763   | ClarityFoundationBiomar   | MEK162                      | MEK162                       | BINIMETINIB          | chembl:CHEMBL3187723 |
| NF2     | 4771   | CIViC                     | SELUMETIN                   | SELUMETINIB                  |                      | chembl:CHEMBL1614701 |
| NFATC2  | 4773   | PharmGKB                  | asparaginase                | asparaginase                 | ASPARAGINASE         | chembl:CHEMBL2108989 |
| NFE2    | 4778   | NCI                       | PACLITAXE                   | PACLITAXEL                   |                      | chembl:CHEMBL428647  |
| NFE2L2  | 4780   | DTC                       | ALDICARB                    | ALDICARB                     |                      | chembl:CHEMBL91732   |
| NFIB    | 4781   | PharmGKB                  | methylphenid                | methylphenidate              | METHYLPHENIDATE      | chembl:CHEMBL796     |

|         |                        |                 |                                |               |                      |        |
|---------|------------------------|-----------------|--------------------------------|---------------|----------------------|--------|
| NFKB1   | 4790 DTC               | SJ000113257     | SJ000113257                    | CHEMBL528694  | chembl:CHEMBL528694  | 0.05   |
| NFKB2   | 4791 TTD               | Quinoxaline     | Quinoxaline derivative 3       |               |                      |        |
| NFKBIA  | 4792 DTC               | 6-METHOXY       | 6-METHOXYCOMAPARVICHEMBL401565 |               | chembl:CHEMBL401565  | 7.07   |
| NFKBIB  | 4793 PharmGKB          | gefitinib       | gefitinib                      | GEFITINIB     | chembl:CHEMBL939     | 1.87   |
| NFKBIL1 | 4795 NCI               | IFN             | IFN                            |               |                      |        |
| NGB     | 58157 NCI              | SODIUM SASODIUM | SALICYLATE                     |               |                      |        |
| NGF     | 4803 TTD               | CXB-909         | CXB-909                        |               |                      |        |
| NGFR    | 4804 TTD               | Fulranumab      | Fulranumab                     | FULRANUMAB    | chembl:CHEMBL1743023 | 10.61  |
| NIM1K   | 167359 GuideToPharmac  | 249565794       | COMPOUND 89S [PMID: 19115845]  |               |                      |        |
| NKX6-1  | 4825 PharmGKB          | haloperidol     | haloperidol                    | HALOPERIDOL   | chembl:CHEMBL54      | 0.9    |
| NLK     | 51701 GuideToPharmac   | 249565802       | COMPOUND 25 [PMID: 17935989]   |               |                      |        |
| NLRP1   | 22861 GuideToPharmac   | 178101721       | MURAMYL DIPEPTIDE              |               |                      |        |
| NLRP3   | 114548 GuideToPharmac  | 375973244       | DAPANSUTRILE                   | DAPANSUTRILE  | chembl:CHEMBL3989943 | 14.14  |
| NMBR    | 4829 GuideToPharmac    | 135652568       | [125I][TYR4]BOMBESIN           |               |                      |        |
| NME1    | 4830 PharmGKB          | tenofovir       | tenofovir                      | TENOFOVIR     | chembl:CHEMBL483     | 1.33   |
| NME2    | 4831 PharmGKB          | zidovudine      | zidovudine                     | ZIDOVUDINE    | chembl:CHEMBL129     | 1.03   |
| NMUR1   | 10316 GuideToPharmac   | 135652536       | [125I]NEUROMEDIN U-23 (RAT)    |               |                      |        |
| NMUR2   | 56923 GuideToPharmac   | 135652329       | NEUROMEDIN U-25                |               |                      |        |
| NNMT    | 4837 TdgClinicalTrial  | NIACIN          | NIACIN                         | NIACIN        | chembl:CHEMBL573     | 28.29  |
| NOD1    | 10392 GuideToPharmac   | 178101718       | MESO-DAP                       |               |                      |        |
| NOD2    | 64127 DTC              | NSC-50688       | NSC-50688                      | CHEMBL1456848 | chembl:CHEMBL1456848 | 1.33   |
| NODAL   | 4838 NCI               | FGF4            | FGF4                           |               |                      |        |
| NOS1    | 4842 PharmGKB          | ibuprofen       | ibuprofen                      | IBUPROFEN     | chembl:CHEMBL521     | 0.1    |
| NOS1AP  | 9722 PharmGKB          | verapamil       | verapamil                      | VERAPAMIL     | chembl:CHEMBL6966    | 0.64   |
| NOS2    | 4843 TTD               | GW274150        | GW274150                       | GW-274150     | chembl:CHEMBL114551  | 1.93   |
| NOS3    | 4846 PharmGKB          | fluorouracil    | fluorouracil                   | FLUOROURACIL  | chembl:CHEMBL185     | 0.11   |
| NOTCH1  | 4851 JAX-CKB           | LY3039478       | LY3039478                      | CRENIGACESTAT | chembl:CHEMBL2338397 | 3.74   |
| NOTCH2  | 4853 MyCancerGenom     | MK0752          | MK0752                         |               |                      |        |
| NOTCH3  | 4854 CIViC             | TAREXTUM        | TAREXTUMAB                     | TAREXTUMAB    | chembl:CHEMBL3301588 | 63.65  |
| NOTCH4  | 4855 MyCancerGenom     | RO4929097       | RO4929097                      | RG-4733       | chembl:CHEMBL4297422 | 2.65   |
| NOX1    | 27035 GuideToPharmac   | 363894229       | GKT136901                      |               |                      |        |
| NOX4    | 50507 GuideToPharmac   | 363894228       | COMPOUND 87 [PMID: 20942471]   |               |                      |        |
| NOX5    | 79400 GuideToPharmac   | 363894227       | NSC 780521                     |               |                      |        |
| NPBWR1  | 2831 GuideToPharmac    | 178100695       | AVA5                           |               |                      |        |
| NPBWR2  | 2832 GuideToPharmac    | 135651827       | NEUROPEPTIDE B-23              |               |                      |        |
| NPC1    | 4864 DTC               | SU-4312         | SU-4312                        | CHEMBL328710  | chembl:CHEMBL328710  | 0.04   |
| NPC1L1  | 29881 TdgClinicalTrial | EZETIMIBE       | EZETIMIBE                      | EZETIMIBE     | chembl:CHEMBL1138    | 175.04 |
| NPEPL1  | 79716 ChemblInteractio | CHEMBL21        | (TOSEDOSTAT                    | TOSEDOSTAT    | chembl:CHEMBL2103847 | 3.35   |
| NPEPPS  | 9520 TTD               | CHR-2797        | CHR-2797                       | TOSEDOSTAT    | chembl:CHEMBL2103847 | 3.35   |
| NPFFR1  | 64106 GuideToPharmac   | 178100845       | [3H]NPVF                       |               |                      |        |
| NPFFR2  | 10886 GuideToPharmac   | 135651833       | NEUROPEPTIDE FF                |               |                      |        |
| NPHS1   | 4868 PharmGKB          | losartan        | losartan                       | LOSARTAN      | chembl:CHEMBL191     | 7.07   |

|          |                                |                                                      |                      |                      |       |
|----------|--------------------------------|------------------------------------------------------|----------------------|----------------------|-------|
| NPIP8    | 728734 PharmGKB                | acetaminophacetaminophen                             | ACETAMINOPHEN        | chembl:CHEMBL112     | 0.82  |
| NPM1     | 4869 JAX-CKB                   | Crizotinib Crizotinib                                | CRIZOTINIB           | chembl:CHEMBL601719  | 1.52  |
| NPPA     | 4878 NCI                       | AZA AZA                                              |                      |                      |       |
| NPPA-AS1 | 100379251 PharmGKB             | furosemide furosemide                                | FUROSEMIDE           | chembl:CHEMBL35      | 3.26  |
| NPPC     | 4880 NCI                       | PMA PMA                                              |                      |                      |       |
| NPR1     | 4881 GuideToPharmac antagonist | 178101553 [ASU7,23']B-ANP-(7-28)                     |                      |                      |       |
| NPR2     | 4882 GuideToPharmac antagonist | 178101554 [SER11](N-CNP,C-ANP)PBNP2-15               |                      |                      |       |
| NPR3     | 4883 GuideToPharmac agonist    | 178101592 CANF4-23                                   |                      |                      |       |
| NPSR1    | 387129 DTC                     | GNF-PF-399(GNF-PF-3996                               | CHEMBL584458         | chembl:CHEMBL584458  | 0.05  |
| NPTN     | 27020 NCI                      | ANTISERUMANTISERUM                                   |                      |                      |       |
| NPTX2    | 4885 TTD                       | PRM-151 PRM-151                                      | PRM-151              | chembl:CHEMBL4297814 | 63.65 |
| NPTXR    | 23467 TTD                      | NNZ-2566 NNZ-2566                                    |                      |                      |       |
| NPY      | 4852 NCI                       | VACCINE VACCINE                                      |                      |                      |       |
| NPY1R    | 4886 DTC                       | DNDI141777DNDI1417776                                | CHEMBL1585652        | chembl:CHEMBL1585652 | 2.65  |
| NPY2R    | 4887 GuideToPharmac agonist    | 135652346 NPY-(16-36) (PIG)                          |                      |                      |       |
| NPY4R    | 5540 GuideToPharmac agonist    | 135652551 [125I]PYY (PIG)                            |                      |                      |       |
| NPY5R    | 4889 GuideToPharmac agonist    | 135652406 [PP1-17,ALA31,AIB32]NPY (HUMAN)            |                      |                      |       |
| NQO1     | 1728 TEND                      | MENADIONMENADIONE                                    | MENADIONE            | chembl:CHEMBL590     | 0.65  |
| NQO2     | 4835 DTC                       | NSC-640556 NSC-640556                                | CHEMBL1983317        | chembl:CHEMBL1983317 | 4.24  |
| NR0B1    | 190 DTC                        | VINCRISTINVINCRISTINE SULFATE                        | VINCRISTINE SULFATE  | chembl:CHEMBL501867  | 0.37  |
| NR0B2    | 8431 GuideToPharmacology       | 252827495 COMPOUND 10 [PMID: 18759424]               |                      |                      |       |
| NR1D1    | 9572 DTC                       | SR9011 SR9011                                        | SR9011               | chembl:CHEMBL1961797 | 21.22 |
| NR1D2    | 9975 GuideToPharmac antagonist | 310264683 COBALT PROTOPORPHYRIN IX                   |                      |                      |       |
| NR1H2    | 7376 GuideToPharmac agonist    | 135651470 DESMOSTEROL                                | DESMOSTEROL          | chembl:CHEMBL455876  | 6.82  |
| NR1H3    | 10062 TTD                      | US9006244, US9006244, E2a                            |                      |                      |       |
| NR1H4    | 9971 DTC                       | PENTACHLOROPENTACHLOROPHENOL                         | PENTACHLOROPHENOL    | chembl:CHEMBL75967   | 0.07  |
| NR1I2    | 8856 PharmGKB                  | diethylstilbes diethylstilbestrol                    | DIETHYLSTILBESTROL   | chembl:CHEMBL411     | 0.08  |
| NR1I3    | 9970 DTC                       | ETHINYL EETHINYL ESTRADIOL                           | ETHINYL ESTRADIOL    | chembl:CHEMBL691     | 0.76  |
| NR2C1    | 7181 NCI                       | RETINOIC ARETINOIC ACID                              |                      |                      |       |
| NR2C2    | 7182 GuideToPharmac agonist    | 135651435 TRETINOIN                                  | TRETINOIN            | chembl:CHEMBL38      | 0.96  |
| NR2E1    | 7101 GuideToPharmac agonist    | 135651435 TRETINOIN                                  | TRETINOIN            | chembl:CHEMBL38      | 1.93  |
| NR2E3    | 10002 DTC                      | GNF-PF-303' GNF-PF-3037                              | CHEMBL600336         | chembl:CHEMBL600336  | 0.39  |
| NR2F2    | 7026 DTC                       | CYCLOHEXCYCLOHEXIMIDE                                | CYCLOHEXIMIDE        | chembl:CHEMBL123292  | 0.76  |
| NR3C1    | 2908 TTD                       | Mifepristone Mifepristone                            | MIFEPRISTONE         | chembl:CHEMBL1276308 | 0.24  |
| NR3C2    | 4306 ChemblInteractio agonist  | CHEMBL12(DESOXYCORTICOSTERONDESOXYCORTICOSTERONE PIV | chembl:CHEMBL1200592 | 8.3                  |       |
| NR4A1    | 3164 NCI                       | L-DOPA L-DOPA                                        | LEVODOPA             | chembl:CHEMBL1009    | 0.52  |
| NR4A3    | 8013 NCI                       | ANTISENSEANTISENSE OLIGONUCLEOTIDES                  |                      |                      |       |
| NR5A1    | 2516 NCI                       | DEXAMETHDEXAMETHASONE                                | DEXAMETHASONE        | chembl:CHEMBL384467  | 0.17  |
| NR5A2    | 2494 DTC                       | TDR79154 TDR79154                                    | CHEMBL597670         | chembl:CHEMBL597670  | 15.91 |
| NR6A1    | 2649 NCI                       | ANTISERUMANTISERUM                                   |                      |                      |       |
| NRAS     | 4893 TTD                       | GI-4000 GI-4000                                      |                      |                      |       |
| NRG1     | 3084 NCI                       | NERVE GRCNERVE GROWTH FACTOR                         |                      |                      |       |

|        |                       |                                                      |                          |                      |        |
|--------|-----------------------|------------------------------------------------------|--------------------------|----------------------|--------|
| NRG2   | 9542 PharmGKB         | panitumumabpanitumumab                               | PANITUMUMAB              | chembl:CHEMBL1201827 | 1.52   |
| NRG3   | 10718 PharmGKB        | cetuximab cetuximab                                  | CETUXIMAB                | chembl:CHEMBL1201577 | 0.49   |
| NRIP1  | 8204 NCI              | RETINOIC ARETINOIC ACID                              |                          |                      |        |
| NRP1   | 8829 TEND             | PEGAPTANIPEGAPTANIB                                  | PEGAPTANIB SODIUM        | chembl:CHEMBL1201421 | 31.83  |
| NRP2   | 8828 PharmGKB         | daunorubicin daunorubicin                            | DAUNORUBICIN             | chembl:CHEMBL178     | 1.99   |
| NRXN1  | 9378 PharmGKB         | antipsychotic:antipsychotics                         |                          |                      |        |
| NSD2   | 7468 DTC              | NSC-36398 NSC-36398                                  | CHEMBL483206             | chembl:CHEMBL483206  | 0.66   |
| NT5C   | 30833 PharmGKB        | lamivudine lamivudine                                | LAMIVUDINE               | chembl:CHEMBL141     | 1.22   |
| NT5C1A | 84618 PharmGKB        | fluorouracil fluorouracil                            | FLUOROURACIL             | chembl:CHEMBL185     | 0.4    |
| NT5C2  | 22978 PharmGKB        | didanosine didanosine                                | DIDANOSINE               | chembl:CHEMBL1460    | 2.12   |
| NT5C3A | 51251 PharmGKB        | cytarabine cytarabine                                | CYTARABINE               | chembl:CHEMBL803     | 0.99   |
| NT5E   | 4907 GuideToPharmac   | inhibitor 404859154 AB680                            |                          |                      |        |
| NTF3   | 4908 NCI              | PILOCARPINPILOCARPINE                                | PILOCARPINE              | chembl:CHEMBL550     | 0.57   |
| NTF4   | 4909 NCI              | BDNF BDNF                                            |                          |                      |        |
| NTNG1  | 22854 PharmGKB        | allopurinol allopurinol                              | ALLOPURINOL              | chembl:CHEMBL1467    | 4.39   |
| NTRK1  | 4914 TTD              | Pyrazolo[1,5-Pyrazolo[1,5-a]pyrimidine derivative 17 |                          |                      |        |
| NTRK2  | 4915 TTD              | Macrocycle dMacrocycle derivative 13                 |                          |                      |        |
| NTRK3  | 4916 GuideToPharmac   | inhibitor 381744997 REPOTRECTINIB                    | REPOTRECTINIB            | chembl:CHEMBL4298138 | 0.94   |
| NTS    | 4922 NCI              | NORETHISTNORETHISTERONE                              | NORETHINDRONE            | chembl:CHEMBL1162    | 1.77   |
| NTSR1  | 4923 ChemblInteractio | antagonistCHEMBL50(REMINE                            | REMINERTANT              | chembl:CHEMBL506981  | 13.64  |
| NTSR2  | 23620 GuideToPharmac  | agonist 135652225 JMV457                             |                          |                      |        |
| NUAK1  | 9891 GuideToPharmac   | inhibitor 310264738 CERDULATINIB                     | CERDULATINIB             | chembl:CHEMBL3545284 | 7.07   |
| NUAK2  | 81788 GuideToPharmac  | inhibitor 249565727 WZ4003                           |                          |                      |        |
| NUBPL  | 80224 PharmGKB        | iloperidone iloperidone                              | ILOPERIDONE              | chembl:CHEMBL14376   | 8.49   |
| NUCB1  | 4924 GuideToPharmac   | antagonist 252166902 KML110                          |                          |                      |        |
| NUCB2  | 4925 PharmGKB         | hydrochlorothhydrochlorothiazide                     | HYDROCHLOROTHIAZIDE      | chembl:CHEMBL435     | 3.54   |
| NUDT1  | 4521 PharmGKB         | 8-oxo-dgtp 8-oxo-dgtp                                |                          |                      |        |
| NUDT15 | 55270 FDA             | MercaptopuriMercaptopurine                           | MERCAPTOPURINE           | chembl:CHEMBL1425    | 14.73  |
| NUDT7  | 283927 GuideToPharmac | inhibitor 384403663 NUDT7-COV-1                      |                          |                      |        |
| NUMA1  | 4926 PharmGKB         | calcium chanicalcium channel blockers                |                          |                      |        |
| NUP107 | 57122 PharmGKB        | Platinum corPlatinum compounds                       |                          |                      |        |
| NUP50  | 10762 PharmGKB        | teniposide teniposide                                | TENIPOSIDE               | chembl:CHEMBL452231  | 15.91  |
| OASL   | 8638 PharmGKB         | peginterferon peginterferon alfa-2b                  |                          |                      |        |
| OAT    | 4942 DTC              | GABACULINGABACULINE                                  | GABACULINE               | chembl:CHEMBL1232972 | 254.61 |
| OCLN   | 100506658 NCI         | RETINOIC ARETINOIC ACID                              |                          |                      |        |
| OCRL   | 4952 PharmGKB         | tenofovir tenofovir                                  | TENOFOVIR                | chembl:CHEMBL483     | 10.61  |
| ODC1   | 4953 ChemblInteractio | inhibitor CHEMBL12(EFLORNITHINE HYDROCH              | EFLORNITHINE HYDROCHLORI | chembl:CHEMBL1201037 | 21.22  |
| OGA    | 10724 TTD             | MK 8719 MK 8719                                      |                          |                      |        |
| OGDH   | 4967 TTD              | CPI-613 CPI-613                                      |                          |                      |        |
| OGFR   | 11054 TTD             | INNO-105 INNO-105                                    |                          |                      |        |
| OGG1   | 4968 NCI              | CAFFEINE CAFFEINE                                    | CAFFEINE                 | chembl:CHEMBL113     | 4.24   |
| OLR1   | 4973 TdgClinicalTrial | BI-204 BI-204                                        |                          |                      |        |

|         |                                  |                                                             |  |                 |                      |       |
|---------|----------------------------------|-------------------------------------------------------------|--|-----------------|----------------------|-------|
| OPCML   | 4978 PharmGKB                    | methylphenidmethylphenidate                                 |  | METHYLPHENIDATE | chembl:CHEMBL796     | 2.83  |
| OPLAH   | 26873 NCI                        | MELPHALA MELPHALAN                                          |  | MELPHALAN       | chembl:CHEMBL852     | 6.7   |
| OPN1LW  | 5956 DTC                         | CYCLOCITRCYCLOCITRAL                                        |  | CYCLOCITRAL     | chembl:CHEMBL1952257 | 25.46 |
| OPRD1   | 4985 DTC                         | SB-0304 SB-0304                                             |  | CHEMBL409225    | chembl:CHEMBL409225  | 0.98  |
| OPRK1   | 4986 GuideToPharmacagonist       | 135650321 GR 89696                                          |  |                 |                      |       |
| OPRL1   | 4987 GuideToPharmac antagonist   | 387065582 NIK-21273                                         |  |                 |                      |       |
| OPRM1   | 4988 TEND                        | LEVOMETHLEVOMETHADYL ACETATE                                |  |                 |                      |       |
| OR52E2  | 119678 PharmGKB                  | lithium lithium                                             |  | LITHIUM         | chembl:CHEMBL2146126 | 2.77  |
| OR52J2P | 79529 PharmGKB                   | lithium lithium                                             |  | LITHIUM         | chembl:CHEMBL2146126 | 2.77  |
| OR52J3  | 119679 PharmGKB                  | lithium lithium                                             |  | LITHIUM         | chembl:CHEMBL2146126 | 2.77  |
| ORAI1   | 84876 TdgClinicalTrial           | CM2489 CM2489                                               |  |                 |                      |       |
| ORAI2   | 80228 GuideToPharmac blocker     | 381118798 GSK-7975A                                         |  |                 |                      |       |
| ORM2    | 5005 PharmGKB                    | docetaxel docetaxel                                         |  | DOCETAXEL       | chembl:CHEMBL92      | 1.61  |
| OSM     | 5008 TTD                         | GSK2330811GSK2330811                                        |  |                 |                      |       |
| OTC     | 5009 PharmGKB                    | sodium benzcsodium benzoate / sodium phenylacetate          |  |                 |                      |       |
| OTOS    | 150677 PharmGKB                  | cisplatin cisplatin                                         |  | CISPLATIN       | chembl:CHEMBL11359   | 1.32  |
| OXER1   | 165140 DTC                       | 5-OXO-ETE 5-OXO-ETE                                         |  | 5-OXO-ETE       | chembl:CHEMBL18028   | 47.74 |
| OXGR1   | 27199 GuideToPharmac agonist     | 178100543 A-KETOGLUTARIC ACID                               |  |                 |                      |       |
| OXSR1   | 9943 GuideToPharmac inhibitor    | 249565899 COMPOUND 74 [PMID: 24793884]                      |  |                 |                      |       |
| OXT     | 5020 TEND                        | OXYTOCIN OXYTOCIN                                           |  | OXYTOCIN        | chembl:CHEMBL395429  | 28.29 |
| OXTR    | 5021 GuideToPharmac antagonist   | 135650471 L-368,228                                         |  |                 |                      |       |
| P2RX1   | 5023 GuideToPharmac agonist      | 178101053 L-BF-MEATP                                        |  |                 |                      |       |
| P2RX2   | 22953 GuideToPharmac antagonist  | 336446931 NF770                                             |  |                 |                      |       |
| P2RX3   | 5024 TTD                         | AF-219 AF-219                                               |  | GEFAPIXANT      | chembl:CHEMBL3716057 | 38.19 |
| P2RX4   | 5025 TTD                         | P2X4 inhibitoP2X4 inhibitora                                |  |                 |                      |       |
| P2RX7   | 5027 TTD                         | Pyridazinone Pyridazinone derivative 1                      |  |                 |                      |       |
| P2RY1   | 5028 GuideToPharmac antagonist   | 135649697 2-CHLOROADENOSINE-5-TRIPHOSPHATE                  |  |                 |                      |       |
| P2RY10  | 27334 GuideToPharmac antagonist  | 135650448 JTE-013                                           |  |                 |                      |       |
| P2RY11  | 5032 DTC                         | ISO-IANTHEISO-IANTHERAN A                                   |  | ISO-IANTHERAN A | chembl:CHEMBL240681  | 7.07  |
| P2RY12  | 64805 GuideToPharmac antagonist  | 135650403 REGRELOR                                          |  | REGRELOR        | chembl:CHEMBL1162175 | 7.07  |
| P2RY13  | 53829 GuideToPharmac antagonist  | 135650843 PPADS                                             |  |                 |                      |       |
| P2RY14  | 9934 GuideToPharmac agonist      | 135651587 UDP-GLUCURONIC ACID                               |  |                 |                      |       |
| P2RY2   | 5029 NCI                         | ATRA ATRA                                                   |  | TRETINOIN       | chembl:CHEMBL38      | 0.43  |
| P2RY4   | 5030 GuideToPharmac agonist      | 135651590 DENUFOSOL                                         |  | DENUFOSOL       | chembl:CHEMBL507282  | 7.96  |
| P2RY6   | 5031 GuideToPharmac agonist      | 135651589 UP3U                                              |  |                 |                      |       |
| P2RY8   | 286530 TdgClinicalTrial          | MC-1 MC-1                                                   |  |                 |                      |       |
| P3H3    | 10536 PharmGKB                   | sertraline sertraline                                       |  | SERTRALINE      | chembl:CHEMBL809     | 6.06  |
| P4HA1   | 5033 DTC                         | PYRIDINE-2PYRIDINE-2,5-DICARBOX'PYRIDINE-2,5-DICARBOXYLIC A |  |                 | chembl:CHEMBL88972   | 42.43 |
| P4HB    | 5034 DTC                         | RALOXIFENRALOXIFENE HYDROCHLRALOXIFENE HYDROCHLORIDI        |  |                 | chembl:CHEMBL1116    | 0.32  |
| P4HTM   | 54681 ChemblInteractio inhibitor | CHEMBL354DAPRODUSTAT                                        |  | DAPRODUSTAT     | chembl:CHEMBL3544988 | 7.96  |
| PABPC1  | 26986 DTC                        | GNF-PF-461GNF-PF-4618                                       |  | CHEMBL585964    | chembl:CHEMBL585964  | 7.96  |
| PACSIN2 | 11252 PharmGKB                   | methotrexate methotrexate                                   |  | METHOTREXATE    | chembl:CHEMBL34259   | 0.59  |

|        |                                  |                                                         |                     |                      |       |
|--------|----------------------------------|---------------------------------------------------------|---------------------|----------------------|-------|
| PADI1  | 29943 DTC                        | O-CL-AMID O-CL-AMIDINE                                  | CHEMBL1910971       | chembl:CHEMBL1910971 | 15.91 |
| PADI2  | 11240 DTC                        | O-F-AMIDINO-F-AMIDINE                                   | CHEMBL1910970       | chembl:CHEMBL1910970 | 10.61 |
| PADI3  | 51702 DTC                        | O-F-AMIDINO-F-AMIDINE                                   | CHEMBL1910970       | chembl:CHEMBL1910970 | 15.91 |
| PADI4  | 23569 DTC                        | O-F-AMIDINO-F-AMIDINE                                   | CHEMBL1910970       | chembl:CHEMBL1910970 | 15.91 |
| PAEP   | 5047 NCI                         | GENISTEIN GENISTEIN                                     | GENISTEIN           | chembl:CHEMBL44      | 2.36  |
| PAH    | 5053 TEND                        | TETRAHYD TETRAHYDROBIOPTERINS                           | SAPROPTERIN         | wikidata:Q419808     | 5.3   |
| PAK1   | 5058 DTC                         | AZD-1152-HAZD-1152-HQPA                                 | AZD-1152-HQPA       | chembl:CHEMBL215152  | 0.26  |
| PAK2   | 5062 GuideToPharmac inhibitor    | 310264720 FRAX597                                       |                     |                      |       |
| PAK3   | 5063 GuideToPharmac inhibitor    | 310264720 FRAX597                                       |                     |                      |       |
| PAK4   | 10298 DTC                        | 681640                                                  | 681640 CHEMBL379975 | chembl:CHEMBL379975  | 0.08  |
| PAK5   | 57144 DTC inhibitor              | HESPERADIHESPERADIN                                     | HESPERADIN          | chembl:CHEMBL514409  | 0.53  |
| PAK6   | 56924 GuideToPharmac inhibitor   | 310264718 PF-3758309                                    | PF-03758309         | chembl:CHEMBL3128043 | 5.3   |
| PALB2  | 79728 CIViC                      | OLAPARIB OLAPARIB                                       | OLAPARIB            | chembl:CHEMBL521686  | 2.36  |
| PANX1  | 24145 GuideToPharmac inhibitor   | 178100972 CARBENOXOLONE                                 | CARBENOXOLONE       | chembl:CHEMBL499915  | 2.65  |
| PANX2  | 56666 GuideToPharmac inhibitor   | 178100972 CARBENOXOLONE                                 | CARBENOXOLONE       | chembl:CHEMBL499915  | 2.65  |
| PANX3  | 116337 GuideToPharmac inhibitor  | 178100972 CARBENOXOLONE                                 | CARBENOXOLONE       | chembl:CHEMBL499915  | 2.65  |
| PAPLN  | 89932 PharmGKB                   | citalopram citalopram                                   | CITALOPRAM          | chembl:CHEMBL549     | 1.87  |
| PAPOLA | 10914 NCI                        | ETOPOSIDE ETOPOSIDE                                     | ETOPOSIDE           | chembl:CHEMBL44657   | 2.45  |
| PAPPA  | 5069 NCI                         | TRANSFOR TRANSFORMING GROWTH FACTOR                     |                     |                      |       |
| PARD3B | 117583 PharmGKB                  | oxaliplatin oxaliplatin                                 | OXALIPLATIN         | chembl:CHEMBL414804  | 1.72  |
| PARG   | 8505 DTC                         | BENZAMID BENZAMIDE                                      | BENZAMIDE           | chembl:CHEMBL267373  | 127.3 |
| PARP1  | 142 TTD                          | Quinazolined Quinazolinedione derivative 2              |                     |                      |       |
| PARP11 | 57097 PharmGKB                   | antidepressan antidepressants                           |                     |                      |       |
| PARP2  | 10038 ChemblInteractio inhibitor | CHEMBL52 OLAPARIB                                       | OLAPARIB            | chembl:CHEMBL521686  | 1.68  |
| PARP3  | 10039 ChemblInteractio inhibitor | CHEMBL50 VELIPARIB                                      | VELIPARIB           | chembl:CHEMBL506871  | 1.27  |
| PASK   | 23178 DTC                        | ALSTERPAU ALSTERPAULLONE                                | ALSTERPAULLONE      | chembl:CHEMBL50894   | 0.64  |
| PAX2   | 5076 NCI                         | AG 490 AG 490                                           |                     |                      |       |
| PAX4   | 5078 PharmGKB                    | repaglinide repaglinide                                 | REPAGLINIDE         | chembl:CHEMBL1272    | 2.12  |
| PAX5   | 5079 NCI                         | TCDD TCDD                                               |                     |                      |       |
| PAX8   | 7849 DTC                         | DOXORUBI DOXORUBICIN HYDROCF DOXORUBICIN HYDROCHLORII   |                     | chembl:CHEMBL359744  | 0.03  |
| PBK    | 55872 DTC                        | LINIFANIB LINIFANIB                                     | LINIFANIB           | chembl:CHEMBL223360  | 0.18  |
| PBRM1  | 55193 GuideToPharmac inhibitor   | 249565598 PFI-3                                         |                     |                      |       |
| PC     | 5091 NCI                         | AMPHOTERAMPHOTERICIN B                                  |                     |                      |       |
| PCBD1  | 5092 NCI                         | H2O2 H2O2                                               |                     |                      |       |
| PCLAF  | 9768 TTD                         | Indol-3-carbin Indol-3-carbinol                         |                     |                      |       |
| PCNA   | 5111 TTD                         | ATX-101 ATX-101                                         | DEOXYCHOLIC ACID    | chembl:CHEMBL406393  | 21.22 |
| PCSK1  | 5122 GuideToPharmac inhibitor    | 178103178 PHENYLACETYL-ARG-VAL-ARG-4-AMIDINOBENZYLAMIDE |                     |                      |       |
| PCSK2  | 5126 GuideToPharmac inhibitor    | 252166858 PEPTIDE 18 [PMID: 24350995]                   |                     |                      |       |
| PCSK4  | 54760 GuideToPharmac inhibitor   | 252166868 FURIN INHIBITOR PEPTIDE                       |                     |                      |       |
| PCSK5  | 5125 GuideToPharmac inhibitor    | 178103178 PHENYLACETYL-ARG-VAL-ARG-4-AMIDINOBENZYLAMIDE |                     |                      |       |
| PCSK6  | 5046 GuideToPharmac inhibitor    | 252166858 PEPTIDE 18 [PMID: 24350995]                   |                     |                      |       |
| PCSK7  | 9159 GuideToPharmac inhibitor    | 252166868 FURIN INHIBITOR PEPTIDE                       |                     |                      |       |

|          |                        |                                                                       |  |                |                      |       |
|----------|------------------------|-----------------------------------------------------------------------|--|----------------|----------------------|-------|
| PCSK9    | 255738 TTD             | BococizumabBococizumab                                                |  | BOCOCIZUMAB    | chembl:CHEMBL3137349 | 31.83 |
| PCYT1A   | 5130 PharmGKB          | lamivudine lamivudine                                                 |  | LAMIVUDINE     | chembl:CHEMBL141     | 2.45  |
| PCYT1B   | 9468 TTD               | CT-2584 CT-2584                                                       |  | CT-2584        | chembl:CHEMBL4297274 | 31.83 |
| PCYT2    | 5833 PharmGKB          | lamivudine lamivudine                                                 |  | LAMIVUDINE     | chembl:CHEMBL141     | 2.45  |
| PDCD1    | 5133 TTD               | PDR001 PDR001                                                         |  | SPARTALIZUMAB  | chembl:CHEMBL4297831 | 9.09  |
| PDCD1LG2 | 80380 CIViC            | PEMBROLIZPEMBROLIZUMAB                                                |  | PEMBROLIZUMAB  | chembl:CHEMBL3137343 | 2.89  |
| PDCD4    | 27250 CIViC            | PACLITAXEPACLITAXEL                                                   |  | PACLITAXEL     | chembl:CHEMBL428647  | 1.31  |
| PDE10A   | 10846 TTD              | PMID273216PMID27321640-Compound-58                                    |  |                |                      |       |
| PDE11A   | 50940 GuideToPharmac   | inhibitor 178103173 BC11-38                                           |  |                |                      |       |
| PDE1A    | 5136 GuideToPharmac    | inhibitor 178101953 SCH51866                                          |  |                |                      |       |
| PDE1B    | 5153 TTD               | US9073936, US9073936, 3                                               |  |                |                      |       |
| PDE1C    | 5137 GuideToPharmac    | activator 135652052 CALMODULIN                                        |  |                |                      |       |
| PDE2A    | 5138 TTD               | Pyrido[3,2-e]Pyrido[3,2-e][1,2,4]triazolo[4,3-a]pyrazine derivative 2 |  |                |                      |       |
| PDE3A    | 5139 TTD               | VESNARINCVESNARINONE                                                  |  | VESNARINONE    | chembl:CHEMBL17423   | 0.4   |
| PDE3B    | 5140 ChemblInteractio  | inhibitor CHEMBL19(THEOPHYLLINE                                       |  | THEOPHYLLINE   | chembl:CHEMBL190     | 0.24  |
| PDE4A    | 5141 TdgClinicalTrial  | ENPROFYLIENPROFYLLINE                                                 |  | ENPROFYLLINE   | chembl:CHEMBL279898  | 9.24  |
| PDE4B    | 5142 TdgClinicalTrial  | RPL-554 RPL-554                                                       |  |                |                      |       |
| PDE4C    | 5143 ChemblInteractio  | inhibitor CHEMBL12(OXTRIPHYLLINE                                      |  | OXTRIPHYLLINE  | chembl:CHEMBL1200434 | 0.4   |
| PDE4D    | 5144 ChemblInteractio  | inhibitor CHEMBL932DIPYRIDAMOLE                                       |  | DIPYRIDAMOLE   | chembl:CHEMBL932     | 0.04  |
| PDE5A    | 8654 GuideToPharmac    | inhibitor 178101953 SCH51866                                          |  |                |                      |       |
| PDE6A    | 5145 GuideToPharmac    | inhibitor 252827469 COMPOUND 53 [PMID: 19631533]                      |  |                |                      |       |
| PDE6B    | 5158 ChemblInteractio  | inhibitor CHEMBL932DIPYRIDAMOLE                                       |  | DIPYRIDAMOLE   | chembl:CHEMBL932     | 0.61  |
| PDE6C    | 5146 GuideToPharmac    | inhibitor 384403679 PDE4 INHIBITOR 16                                 |  |                |                      |       |
| PDE6D    | 5147 ChemblInteractio  | inhibitor CHEMBL628PENTOXIFYLLINE                                     |  | PENTOXIFYLLINE | chembl:CHEMBL628     | 0.94  |
| PDE6G    | 5148 ChemblInteractio  | inhibitor CHEMBL628PENTOXIFYLLINE                                     |  | PENTOXIFYLLINE | chembl:CHEMBL628     | 0.94  |
| PDE6H    | 5149 ChemblInteractio  | inhibitor CHEMBL932DIPYRIDAMOLE                                       |  | DIPYRIDAMOLE   | chembl:CHEMBL932     | 0.61  |
| PDE7A    | 5150 TEND              | DYPHYLLINDYPHYLLINE                                                   |  | DYPHYLLINE     | chembl:CHEMBL1752    | 6.06  |
| PDE7B    | 27115 TdgClinicalTrial | DYPHYLLINDYPHYLLINE                                                   |  | DYPHYLLINE     | chembl:CHEMBL1752    | 9.09  |
| PDE8A    | 5151 GuideToPharmac    | inhibitor 178101509 DIPYRIDAMOLE                                      |  | DIPYRIDAMOLE   | chembl:CHEMBL932     | 0.82  |
| PDE8B    | 8622 ChemblInteractio  | inhibitor CHEMBL628PENTOXIFYLLINE                                     |  | PENTOXIFYLLINE | chembl:CHEMBL628     | 0.62  |
| PDE9A    | 5152 ChemblInteractio  | inhibitor CHEMBL628PENTOXIFYLLINE                                     |  | PENTOXIFYLLINE | chembl:CHEMBL628     | 0.62  |
| PDF      | 64146 TTD              | Ustekinumab Ustekinumab                                               |  | USTEKINUMAB    | chembl:CHEMBL1201835 | 0.91  |
| PDGFA    | 5154 MyCancerGenon     | inhibitor SUNITINIB SUNITINIB                                         |  | SUNITINIB      | chembl:CHEMBL535     | 0.8   |
| PDGFB    | 5155 TTD               | CR-002 CR-002                                                         |  |                |                      |       |
| PDGFC    | 56034 MyCancerGenon    | inhibitor SUNITINIB SUNITINIB                                         |  | SUNITINIB      | chembl:CHEMBL535     | 1.59  |
| PDGFD    | 80310 MyCancerGenon    | inhibitor SUNITINIB SUNITINIB                                         |  | SUNITINIB      | chembl:CHEMBL535     | 1.59  |
| PDGFRA   | 5156 DoCM              | IMATINIB IMATINIB                                                     |  | IMATINIB       | chembl:CHEMBL941     | 0.59  |
| PDGFRB   | 5159 ChemblInteractio  | inhibitor CHEMBL576QUIZARTINIB                                        |  | QUIZARTINIB    | chembl:CHEMBL576982  | 0.18  |
| PDHA1    | 5160 TdgClinicalTrial  | CPI-613 CPI-613                                                       |  |                |                      |       |
| PDHA2    | 5161 TdgClinicalTrial  | CPI-613 CPI-613                                                       |  |                |                      |       |
| PDHB     | 5162 TdgClinicalTrial  | CPI-613 CPI-613                                                       |  |                |                      |       |
| PDHX     | 8050 NCI               | AUTOANTICAUTOANTIGEN                                                  |  |                |                      |       |

|          |                                 |                                                                |                  |                      |       |
|----------|---------------------------------|----------------------------------------------------------------|------------------|----------------------|-------|
| PDIA2    | 64714 PharmGKB                  | methylphenidmethylphenidate                                    | METHYLPHENIDATE  | chembl:CHEMBL796     | 2.83  |
| PDK1     | 5163 TTD                        | Heterocyclic Heterocyclic derivative 13                        |                  |                      |       |
| PDK2     | 5164 GuideToPharmac inhibitor   | 328083464 AZD7545                                              |                  |                      |       |
| PDK3     | 5165 TdgClinicalTrial           | CPI-613 CPI-613                                                |                  |                      |       |
| PDK4     | 5166 TdgClinicalTrial           | CPI-613 CPI-613                                                |                  |                      |       |
| PDPK1    | 5170 GuideToPharmac inhibitor   | 249565687 BX-912                                               |                  |                      |       |
| PDYN     | 5173 NCI                        | MORPHINE MORPHINE                                              | MORPHINE         | chembl:CHEMBL70      | 4.11  |
| PEAR1    | 375033 PharmGKB                 | aspirin aspirin                                                | ASPIRIN          | chembl:CHEMBL25      | 0.87  |
| PEBP1    | 5037 NCI                        | FLUTAMIDIFLUTAMIDE                                             | FLUTAMIDE        | chembl:CHEMBL806     | 3.35  |
| PEBP4    | 157310 PharmGKB                 | methylphenidmethylphenidate                                    | METHYLPHENIDATE  | chembl:CHEMBL796     | 2.83  |
| PECAM1   | 5175 NCI                        | RESVERATIRESVERATROL                                           | RESVERATROL      | chembl:CHEMBL165     | 2.65  |
| PEMT     | 10400 ChEMBLInteractions        | CHEMBL21(huHMFG1                                               | HUHMFG1          | chembl:CHEMBL2109637 | 5.3   |
| PER1     | 5187 NCI                        | MORPHINE MORPHINE                                              | MORPHINE         | chembl:CHEMBL70      | 2.05  |
| PERP     | 64065 PharmGKB                  | cyclophosphacyclophosphamide                                   | CYCLOPHOSPHAMIDE | chembl:CHEMBL88      | 0.27  |
| PFKFB3   | 5209 GuideToPharmac inhibitor   | 381118835 PFKFB3 KINASE INHIBITOR 69                           |                  |                      |       |
| PGA3     | 643834 TEND                     | SUCRALFA`SUCRALFATE                                            | SUCRALFATE       | chembl:CHEMBL2367706 | 21.22 |
| PGA5     | 5222 GuideToPharmac inhibitor   | 252166834 COMPOUND 3 [PMID: 8410973]                           |                  |                      |       |
| PGAP6    | 58986 PharmGKB                  | remifentanil remifentanil                                      | REMIFENTANIL     | chembl:CHEMBL1005    | 12.73 |
| PGC      | 5225 TdgClinicalTrial           | ECABET ECABET                                                  | ECABET           | chembl:CHEMBL2104585 | 31.83 |
| PGD      | 5226 NCI                        | PENICILLAMPENICILLAMINE                                        | PENICILLAMINE    | chembl:CHEMBL1430    | 9.09  |
| PGF      | 5228 TTD                        | SFLT-01 SFLT-01                                                |                  |                      |       |
| PGGT1B   | 5229 TdgClinicalTrial           | GGTI-2418 GGTI-2418                                            |                  |                      |       |
| PGK1     | 5230 PharmGKB                   | lamivudine lamivudine                                          | LAMIVUDINE       | chembl:CHEMBL141     | 2.45  |
| PGLYRP4  | 57115 PharmGKB                  | Tumor necrosTumor necrosis factor alpha (TNF-alpha) inhibitors |                  |                      |       |
| PGM1     | 5236 PharmGKB                   | acetaldehyde acetaldehyde                                      | ACETALDEHYDE     | chembl:CHEMBL170365  | 21.22 |
| PGP      | 283871 ClarityFoundationBiomark | ETOPOSIDE ETOPOSIDE                                            | ETOPOSIDE        | chembl:CHEMBL44657   | 0.41  |
| PGR      | 5241 GuideToPharmac agonist     | 178103659 FLUTICASONE PROPIONATE                               |                  |                      |       |
| PGRMC1   | 10857 TdgClinicalTrial          | OPC-14523 OPC-14523                                            |                  |                      |       |
| PHB2     | 11331 NCI                       | STEROID H(STEROID HORMONE                                      |                  |                      |       |
| PHEX     | 5251 NCI                        | RHGH RHGH                                                      |                  |                      |       |
| PHF8     | 23133 GuideToPharmac inhibitor  | 178103604 DAMINOZIDE                                           |                  |                      |       |
| PHKG1    | 5260 GuideToPharmac inhibitor   | 249565884 A-443654                                             | A-443654         | chembl:CHEMBL379300  | 4.9   |
| PHKG2    | 5261 DTC                        | SP-600125 SP-600125                                            | SP-600125        | chembl:CHEMBL1725279 | 0.06  |
| PHOSPHO1 | 162466 DTC                      | LANSOPRA:LANSOPRAZOLE                                          | LANSOPRAZOLE     | chembl:CHEMBL480     | 1.22  |
| PI3      | 5266 NCI                        | PROGESTEFPROGESTERONE                                          | PROGESTERONE     | chembl:CHEMBL103     | 1.77  |
| PI4K2A   | 55361 GuideToPharmac inhibitor  | 135651426 ADENOSINE                                            | ADENOSINE        | chembl:CHEMBL477     | 5.79  |
| PI4K2B   | 55300 GuideToPharmac inhibitor  | 135651426 ADENOSINE                                            | ADENOSINE        | chembl:CHEMBL477     | 5.79  |
| PI4KA    | 5297 TTD                        | BYL719 BYL719                                                  | ALPELISIB        | chembl:CHEMBL2396661 | 0.96  |
| PI4KB    | 5298 GuideToPharmac inhibitor   | 178102683 PIK-93                                               |                  |                      |       |
| PICALM   | 8301 PharmGKB                   | calcium chanicalcium channel blockers                          |                  |                      |       |
| PICK1    | 9463 PharmGKB                   | methampheta methamphetamine                                    | METHAMPHETAMINE  | chembl:CHEMBL1201201 | 4.9   |
| PIEZO1   | 9780 GuideToPharmac inhibitor   | 381118822 DOOKU1                                               |                  |                      |       |

|         |                        |           |                                  |                               |                       |                      |       |
|---------|------------------------|-----------|----------------------------------|-------------------------------|-----------------------|----------------------|-------|
| PIGF    | 5281 Talc              | antibody  | ZALTRAP                          | ZALTRAP                       | ZALTRAP               | wikidata:Q29006714   | 15.91 |
| PIGM    | 93183 PharmGKB         |           | methylphenid                     | methylphenidate               | METHYLPHENIDATE       | chembl:CHEMBL796     | 2.83  |
| PIK3C2A | 5286 MyCancerGenon     | inhibitor | XL147                            | XL147                         | PILARALISIB           | chembl:CHEMBL3360203 | 0.21  |
| PIK3C2B | 5287 MyCancerGenon     | inhibitor | BYL719                           | BYL719                        | ALPELISIB             | chembl:CHEMBL2396661 | 0.13  |
| PIK3C2G | 5288 MyCancerGenon     | inhibitor | GDC-0980                         | GDC-0980                      | APITOLISIB            | chembl:CHEMBL1922094 | 0.17  |
| PIK3C3  | 5289 MyCancerGenon     | inhibitor | PKI-587                          | PKI-587                       | GEDATOLISIB           | chembl:CHEMBL592445  | 0.14  |
| PIK3CA  | 5290 GuideToPharmac    | inhibitor | 249565638                        | ALPELISIB                     | ALPELISIB             | chembl:CHEMBL2396661 | 0.3   |
| PIK3CB  | 5291 GuideToPharmac    | inhibitor | 249565691                        | KU-0060648                    | CHEMBL1086377         | chembl:CHEMBL1086377 | 0.16  |
| PIK3CD  | 5293 ClarityFoundation | Clinical  | NVP-BEZ242                       | NVP-BEZ242                    |                       |                      |       |
| PIK3CG  | 5294 ChemblInteractio  | inhibitor | CHEMBL23(TG100-115               |                               | TG100-115             | chembl:CHEMBL230011  | 0.48  |
| PIK3R1  | 5295 ClarityFoundation | Biomark   | ZSTK474                          | ZSTK474                       |                       |                      |       |
| PIK3R2  | 5296 MyCancerGenon     | inhibitor | PF-4691502                       | PF-4691502                    | PF-04691502           | chembl:CHEMBL1234354 | 0.21  |
| PIK3R3  | 8503 MyCancerGenon     | inhibitor | GDC-0941                         | GDC-0941                      | PICTILISIB            | chembl:CHEMBL521851  | 0.13  |
| PIK3R4  | 30849 MyCancerGenon    | inhibitor | PI-103                           | PI-103                        | PI-103                | chembl:CHEMBL573339  | 0.2   |
| PIK3R5  | 23533 MyCancerGenon    | inhibitor | SOPHORETISOPHORETIN              |                               | QUERCETIN             | chembl:CHEMBL50      | 0.03  |
| PIK3R6  | 146850 MyCancerGenon   | inhibitor | PKI-587                          | PKI-587                       | GEDATOLISIB           | chembl:CHEMBL592445  | 0.27  |
| PIKFYVE | 200576 TTD             |           | LAM-002                          | LAM-002                       |                       |                      |       |
| PIM1    | 5292 TTD               |           | INCB53914                        | INCB53914                     |                       |                      |       |
| PIM2    | 11040 GuideToPharmac   | inhibitor | 178101947                        | RUBOXISTAURIN                 | RUBOXISTAURIN         | chembl:CHEMBL91829   | 1.14  |
| PIM3    | 415116 TdgClinical     | Trial     | VADIMEZA                         | VADIMEZAN                     | VADIMEZAN             | chembl:CHEMBL71263   | 0.75  |
| PIN1    | 5300 DTC               |           | PURPURIN                         | PURPURIN                      | PURPURIN              | chembl:CHEMBL294264  | 0.14  |
| PIP     | 5304 NCI               |           | HORMONES                         | HORMONES                      |                       |                      |       |
| PIP4K2A | 5305 DTC               |           | SJ000201788                      | SJ000201788                   | CHEMBL602923          | chembl:CHEMBL602923  | 3.18  |
| PIP5K1A | 8394 GuideToPharmac    | inhibitor | 252166654                        | ISA-2011B                     |                       |                      |       |
| PIP5K1C | 23396 PharmGKB         |           | ethanol                          | ethanol                       | ALCOHOL               | chembl:CHEMBL545     | 0.74  |
| PIPSL   | 266971 MyCancerGenon   | inhibitor | CARFILZOM                        | CARFILZOMIB                   | CARFILZOMIB           | chembl:CHEMBL451887  | 0.56  |
| PKD2    | 5311 PharmGKB          |           | allopurinol                      | allopurinol                   | ALLOPURINOL           | chembl:CHEMBL1467    | 4.39  |
| PKD2L1  | 9033 GuideToPharmac    | blocker   | 135652735                        | GD3+                          |                       |                      |       |
| PKM     | 5315 DTC               |           | GNF-PF-281                       | GNF-PF-2812                   | CHEMBL125044          | chembl:CHEMBL125044  | 0.2   |
| PKMYT1  | 9088 GuideToPharmac    | inhibitor | 249565863                        | PD166285                      |                       |                      |       |
| PKN1    | 5585 GuideToPharmac    | inhibitor | 249565832                        | RKI-1447                      |                       |                      |       |
| PKN2    | 5586 DTC               |           | PF-562271                        | PF-562271                     | PF-00562271           | chembl:CHEMBL1084546 | 0.03  |
| PKN3    | 29941 MyCancerGenon    | inhibitor | SOPHORETISOPHORETIN              |                               | QUERCETIN             | chembl:CHEMBL50      | 0.4   |
| PLA2G10 | 8399 GuideToPharmac    | inhibitor | 252827445                        | COMPOUND 12E [PMID: 18605714] |                       |                      |       |
| PLA2G1B | 5319 NCI               |           | MPA                              | MPA                           | PROGESTERONE          | chembl:CHEMBL103     | 0.08  |
| PLA2G2A | 5320 NCI               |           | DIFLUOROMDIFLUOROMETHYLORNITHINE |                               |                       |                      |       |
| PLA2G2D | 26279 GuideToPharmac   | inhibitor | 252827445                        | COMPOUND 12E [PMID: 18605714] |                       |                      |       |
| PLA2G2E | 30814 GuideToPharmac   | inhibitor | 252827445                        | COMPOUND 12E [PMID: 18605714] |                       |                      |       |
| PLA2G2F | 64600 GuideToPharmac   | inhibitor | 252827445                        | COMPOUND 12E [PMID: 18605714] |                       |                      |       |
| PLA2G3  | 50487 TdgClinical      | Trial     | MRX-4                            | MRX-4                         | CONTEZOLID ACEFOSAMIL | chembl:CHEMBL3989966 | 31.83 |
| PLA2G4A | 5321 TEND              |           | FLUOROMEFLUOROMETHOLONE          |                               | FLUOROMETHOLONE       | chembl:CHEMBL1200600 | 2.36  |
| PLA2G5  | 5322 GuideToPharmac    | inhibitor | 252827445                        | COMPOUND 12E [PMID: 18605714] |                       |                      |       |

|         |                        |                                                     |                                         |  |                      |        |
|---------|------------------------|-----------------------------------------------------|-----------------------------------------|--|----------------------|--------|
| PLA2G6  | 8398 TEND              | NIFLUMIC ANIFLUMIC ACID                             |                                         |  |                      |        |
| PLA2G7  | 7941 GuideToPharmac    | inhibitor 178103948 RILAPLADIB                      | RILAPLADIB                              |  | chembl:CHEMBL2104981 | 21.22  |
| PLAT    | 5327 NCI               | LYMPHOKILYMPHOKINES                                 |                                         |  |                      |        |
| PLAU    | 5328 NCI               | RETINOL RETINOL                                     | RETINOL                                 |  | chembl:CHEMBL986     | 0.35   |
| PLAUR   | 5329 NCI               | ADENOVIR,ADENOVIRAL VECTOR                          |                                         |  |                      |        |
| PLCB1   | 23236 PharmGKB         | Selective serc                                      | Selective serotonin reuptake inhibitors |  |                      |        |
| PLCD3   | 113026 PharmGKB        | diltiazem diltiazem                                 | DILTIAZEM                               |  | chembl:CHEMBL23      | 10.61  |
| PLCE1   | 51196 PharmGKB         | hydrochlorotlhydrochlorothiazide                    | HYDROCHLOROTHIAZIDE                     |  | chembl:CHEMBL435     | 3.54   |
| PLCG1   | 5335 PharmGKB          | propionic aci                                       | propionic acid derivatives              |  |                      |        |
| PLCG2   | 5336 GuideToPharmac    | inhibitor 252827477 CCT129957                       |                                         |  |                      |        |
| PLD1    | 5337 GuideToPharmac    | inhibitor 252827439 FIPI                            |                                         |  |                      |        |
| PLD2    | 5338 DTC               | TAMOXIFETAMOXIFEN                                   | TAMOXIFEN                               |  | chembl:CHEMBL83      | 1.08   |
| PLEKHA6 | 22874 PharmGKB         | haloperidol haloperidol                             | HALOPERIDOL                             |  | chembl:CHEMBL54      | 1.79   |
| PLEKHH2 | 130271 PharmGKB        | atenolol atenolol                                   | ATENOLOL                                |  | chembl:CHEMBL24      | 1.87   |
| PLEKHJ1 | 55111 PharmGKB         | candesartan candesartan                             | CANDESARTAN                             |  | chembl:CHEMBL1016    | 14.14  |
| PLG     | 5340 TEND              | UROKINASIUROKINASE                                  | UROKINASE                               |  | chembl:CHEMBL1201420 | 3.29   |
| PLIN1   | 5346 DTC               | TOREMIFENTOREMIFENE CITRATE                         | TOREMIFENE CITRATE                      |  | chembl:CHEMBL1200675 | 0.91   |
| PLIN3   | 10226 TdgClinicalTrial | IDURSULFAIDURSULFASE                                | IDURSULFASE                             |  | chembl:CHEMBL1201826 | 111.39 |
| PLK1    | 5347 DTC               | DNDI141705DNDI1417055                               | CHEMBL1486366                           |  | chembl:CHEMBL1486366 | 0.04   |
| PLK2    | 10769 TTD              | US8598172, US8598172, 1                             |                                         |  |                      |        |
| PLK3    | 1263 DTC               | TAE-684 TAE-684                                     | TAE-684                                 |  | chembl:CHEMBL509032  | 0.05   |
| PLK4    | 10733 DTC              | GS 6201 GS 6201                                     | GS 6201                                 |  | chembl:CHEMBL260933  | 0.22   |
| PLOD1   | 5351 TTD               | Ascorbate Ascorbate                                 |                                         |  |                      |        |
| PLTP    | 5360 NCI               | VITAMIN E VITAMIN E                                 |                                         |  |                      |        |
| PMAIP1  | 5366 NCI               | BORTEZOMBORTEZOMIB                                  | BORTEZOMIB                              |  | chembl:CHEMBL325041  | 1.41   |
| PMCH    | 5367 PharmGKB          | olanzapine olanzapine                               | OLANZAPINE                              |  | chembl:CHEMBL715     | 1.87   |
| PMEL    | 6490 TTD               | Multi-epitopeMulti-epitope tyrosinase/gp100 vaccine |                                         |  |                      |        |
| PML     | 5371 CIViC             | GEMTUZUMGEMTUZUMAB OZOGAMICIN                       |                                         |  |                      |        |
| PMM2    | 5373 DTC               | EBSELEN EBSELEN                                     | EBSELEN                                 |  | chembl:CHEMBL51085   | 1.82   |
| PMP22   | 5376 NCI               | PROGESTEFPROGESTERONE                               | PROGESTERONE                            |  | chembl:CHEMBL103     | 0.88   |
| PMS2    | 5395 CIViC             | NIVOLUMA NIVOLUMAB                                  | NIVOLUMAB                               |  | chembl:CHEMBL2108738 | 8.49   |
| PMVK    | 10654 GuideToPharmac   | inhibitor 135651554 (R)-5-DIPHOSPHOMEVALONATE       |                                         |  |                      |        |
| PNLIP   | 5406 DTC               | HOOKEROSHOOKEROSIDE B                               | HOOKEROSIDE B                           |  | chembl:CHEMBL444815  | 18.19  |
| PNMT    | 5409 NCI               | NERVE GRCNERVE GROWTH FACTOR                        |                                         |  |                      |        |
| PNOC    | 5368 PharmGKB          | methadone methadone                                 | METHADONE                               |  | chembl:CHEMBL651     | 1.14   |
| PNP     | 4860 ChemblInteractio  | inhibitor CHEMBL55(FORODESINE HYDROCHL              | FORODESINE HYDROCHLORID                 |  | chembl:CHEMBL550755  | 50.92  |
| PNPLA3  | 80339 PharmGKB         | vincristine vincristine                             | VINCRISTINE                             |  | chembl:CHEMBL90555   | 0.37   |
| POLA1   | 5422 TdgClinicalTrial  | BROMOVINBROMOVINYL DEOXYURIDINE                     |                                         |  |                      |        |
| POLA2   | 23649 TEND             | DACARBAZDACARBAZINE                                 | DACARBAZINE                             |  | chembl:CHEMBL476     | 24.48  |
| POLB    | 5423 DTC               | ALPHA,BETAALPHA,BETA-METHYLENCHEMBL1162298          |                                         |  | chembl:CHEMBL1162298 | 0.7    |
| POLD1   | 5424 ChemblInteractio  | inhibitor CHEMBL16GEMCITABINE HYDROCH               | GEMCITABINE HYDROCHLORID                |  | chembl:CHEMBL1637    | 1.82   |
| POLE    | 5426 ChemblInteractio  | inhibitor CHEMBL10FLUDARABINE PHOSPHA               | FLUDARABINE PHOSPHATE                   |  | chembl:CHEMBL1096882 | 2.12   |

|          |                                |                                   |                                   |                             |                      |       |
|----------|--------------------------------|-----------------------------------|-----------------------------------|-----------------------------|----------------------|-------|
| POLG     | 5428 FDA                       | Valproic Acid                     | Valproic Acid                     |                             |                      |       |
| POLH     | 5429 DTC                       | AG-538                            | AG-538                            | CHEMBL56393                 | chembl:CHEMBL56393   | 0.01  |
| POLI     | 11201 DTC                      | RHEIN                             | RHEIN                             | RHEIN                       | chembl:CHEMBL418068  | 0.01  |
| POLK     | 51426 DTC                      | RESVERATROL                       | RESVERATROL                       | RESVERATROL                 | chembl:CHEMBL165     | 0.01  |
| POLL     | 27343 DTC                      | 1-DEOXYRUBRALACTON                | 1-DEOXYRUBRALACTON                | CHEMBL260980                | chembl:CHEMBL260980  | 10.61 |
| POLR1G   | 10849 PharmGKB                 | gemcitabine                       | gemcitabine                       | GEMCITABINE                 | chembl:CHEMBL888     | 0.39  |
| POLR2A   | 5430 DTC                       | 3'-DCTP                           | 3'-DCTP                           | CHEMBL480328                | chembl:CHEMBL480328  | 42.43 |
| POLR3G   | 10622 PharmGKB                 | nevirapine                        | nevirapine                        | NEVIRAPINE                  | chembl:CHEMBL57      | 5.53  |
| POLRMT   | 5442 DTC                       | 2',2'-DIFLUORODEOXYCYTIDINE       | 2',2'-DIFLUORODEOXYCYTIDINE       | 2',2'-DIFLUORODEOXYCYTIDINE | chembl:CHEMBL1201383 | 127.3 |
| POM121L2 | 94026 PharmGKB                 | opioids                           | opioids                           |                             |                      |       |
| PON1     | 5444 PharmGKB                  | epirubicin                        | epirubicin                        | EPIRUBICIN                  | chembl:CHEMBL417     | 0.35  |
| PON2     | 5445 PharmGKB                  | antidepressants                   | antidepressants                   |                             |                      |       |
| POR      | 5447 PharmGKB                  | sirolimus                         | sirolimus                         | SIROLIMUS                   | chembl:CHEMBL413     | 0.28  |
| PORCN    | 64840 TTD                      | ETC-192215                        | ETC-192215                        | ETC-159                     | chembl:CHEMBL3633802 | 31.83 |
| POSTN    | 10631 NCI                      | ANTISERUM                         | ANTISERUM                         |                             |                      |       |
| POU2F2   | 5452 DTC                       | LINAGLIPTIN                       | LINAGLIPTIN                       | LINAGLIPTIN                 | chembl:CHEMBL237500  | 63.65 |
| POU5F1   | 5460 PharmGKB                  | phenytoin                         | phenytoin                         | PHENYTOIN                   | chembl:CHEMBL16      | 0.41  |
| PPA1     | 5464 NCI                       | ETHANOL                           | ETHANOL                           | ALCOHOL                     | chembl:CHEMBL545     | 1.48  |
| PPA2     | 27068 PharmGKB                 | risperidone                       | risperidone                       | RISPERIDONE                 | chembl:CHEMBL85      | 0.99  |
| PPARA    | 5465 DTC                       | T091317                           | T091317                           | T091317                     | chembl:CHEMBL62136   | 0.16  |
| PPARD    | 5467 DTC                       | PROPACHLOR                        | PROPACHLOR                        | PROPACHLOR                  | chembl:CHEMBL1394829 | 0.07  |
| PPARG    | 5468 TdgClinicalTrial          | GTF505                            | GTF505                            |                             |                      |       |
| PPAT     | 5471 TTD                       | Azathioprine                      | Azathioprine                      | AZATHIOPRINE                | chembl:CHEMBL1542    | 1.27  |
| PPCDC    | 60490 PharmGKB                 | trastuzumab                       | trastuzumab                       | TRASTUZUMAB                 | chembl:CHEMBL1201585 | 0.76  |
| PPIA     | 5478 GuideToPharmacoinhibitor  | 135652074                         | CYCLOSPORIN A                     |                             |                      |       |
| PPIB     | 5479 TTD                       | L-Proline                         | L-Proline                         | PROLINE                     | chembl:CHEMBL54922   | 127.3 |
| PPID     | 5481 TTD                       | US8901295                         | US8901295, F673                   |                             |                      |       |
| PPIG     | 9360 TTD                       | MELARSOPROL                       | MELARSOPROL                       | MELARSOPROL                 | chembl:CHEMBL166     | 63.65 |
| PPM1A    | 5494 TTD                       | VP-102                            | VP-102                            |                             |                      |       |
| PPM1D    | 8493 DTC                       | DOXORUBICIN                       | DOXORUBICIN                       | DOXORUBICIN                 | chembl:CHEMBL53463   | 1.35  |
| PPME1    | 51400 GuideToPharmacoinhibitor | 252166809                         | ABL127                            |                             |                      |       |
| PPOX     | 5498 TTD                       | Aminolevulinic Acid Hydrochloride | Aminolevulinic Acid Hydrochloride |                             |                      |       |
| PPP1CA   | 5499 TTD                       | CANTHARIDIN                       | CANTHARIDIN                       | CANTHARIDIN                 | chembl:CHEMBL48449   | 10.61 |
| PPP1R13L | 10848 PharmGKB                 | gemcitabine                       | gemcitabine                       | GEMCITABINE                 | chembl:CHEMBL888     | 0.39  |
| PPP1R18  | 170954 PharmGKB                | carboplatin                       | carboplatin                       | CARBOPLATIN                 | chembl:CHEMBL1351    | 0.81  |
| PPP1R1A  | 5502 NCI                       | INSULIN                           | INSULIN                           | INSULIN                     | chembl:CHEMBL1201631 | 2.5   |
| PPP1R1B  | 84152 TdgClinicalTrial         | ITI-007                           | ITI-007                           | LUMATEPERONE                | chembl:CHEMBL3306803 | 6.37  |
| PPP2CA   | 5515 TTD                       | VP-102                            | VP-102                            |                             |                      |       |
| PPP2R5D  | 5528 PharmGKB                  | cyclophosphamide                  | cyclophosphamide                  | CYCLOPHOSPHAMIDE            | chembl:CHEMBL88      | 0.27  |
| PPP3CA   | 5530 TTD                       | Cyclosporine                      | Cyclosporine                      | CYCLOSPORINE                | chembl:CHEMBL160     | 0.26  |
| PPP3CB   | 5532 TdgClinicalTrial          | VOCLOSPORIN                       | VOCLOSPORIN                       | VOCLOSPORIN                 | chembl:CHEMBL2218919 | 12.73 |
| PPP3CC   | 5533 TdgClinicalTrial          | VOCLOSPORIN                       | VOCLOSPORIN                       | VOCLOSPORIN                 | chembl:CHEMBL2218919 | 12.73 |

|         |                                 |                                               |                           |                      |       |
|---------|---------------------------------|-----------------------------------------------|---------------------------|----------------------|-------|
| PPP3R2  | 5535 TdgClinicalTrial           | CYCLOSPORINE A                                |                           |                      |       |
| PPT1    | 5538 NCI                        | LAMOTRIGINE                                   | LAMOTRIGINE               | chembl:CHEMBL741     | 2.45  |
| PPY     | 5539 NCI                        | CISAPRIDE                                     | CISAPRIDE                 | chembl:CHEMBL1729    | 8.49  |
| PRB2    | 653247 TTD                      | MLN9708                                       | MLN9708                   |                      |       |
| PRCP    | 5547 TTD                        | Piperidinyl piperidinyl pyrazole derivative 3 |                           |                      |       |
| PRDX1   | 5052 NCI                        | ANTIOXIDANT                                   |                           |                      |       |
| PRDX4   | 10549 PharmGKB                  | docetaxel                                     | DOCETAXEL                 | chembl:CHEMBL92      | 1.61  |
| PRDX5   | 25824 DTC                       | 2-(2-HYDROXYBENZYL)PIPERIDINE                 | CHEMBL148831              | chembl:CHEMBL148831  | 63.65 |
| PREP    | 5550 GuideToPharmacoinhibitor   | 405560408 POSTSTATIN                          |                           |                      |       |
| PREX2   | 80243 CIViC                     | VEMURAFENIB                                   | VEMURAFENIB               | chembl:CHEMBL1229517 | 4.24  |
| PRF1    | 5551 NCI                        | IL-2                                          | ALDESLEUKIN               | wikidata:Q20801763   | 2.45  |
| PRIM1   | 5557 NCI                        | 3'-DEOXYADENOSINE                             |                           |                      |       |
| PRKAA1  | 5562 NCI                        | DEOXYCOFORMYCIN                               | PENTOSTATIN               | chembl:CHEMBL1580    | 2.45  |
| PRKAA2  | 5563 PharmGKB                   | metformin                                     | METFORMIN                 | chembl:CHEMBL1431    | 1.34  |
| PRKAB1  | 5564 NCI                        | ANTIOXIDANT                                   |                           |                      |       |
| PRKAB2  | 5565 DTC                        | SAPONARIN                                     | SAPONARIN                 | chembl:CHEMBL538921  | 9.09  |
| PRKACA  | 5566 DTC                        | ALISERTIB                                     | ALISERTIB                 | chembl:CHEMBL483158  | 0.07  |
| PRKACB  | 5567 GuideToPharmacoinhibitor   | 178101884 GSK690693                           | GSK-690693                | chembl:CHEMBL494089  | 1.93  |
| PRKACG  | 5568 ChemblInteractioninhibitor | CHEMBL494089 GSK-690693                       | GSK-690693                | chembl:CHEMBL494089  | 2.89  |
| PRKAG1  | 5571 DTC                        | METFORMIN                                     | METFORMIN                 | chembl:CHEMBL1431    | 3.35  |
| PRKAG2  | 51422 DTC                       | SAPONARIN                                     | SAPONARIN                 | chembl:CHEMBL538921  | 6.06  |
| PRKAG3  | 53632 DTC                       | SAPONARIN                                     | SAPONARIN                 | chembl:CHEMBL538921  | 9.09  |
| PRKAR2B | 5577 NCI                        | THEOPHYLLINE                                  | THEOPHYLLINE              | chembl:CHEMBL190     | 5.3   |
| PRKCA   | 5578 GuideToPharmacoinhibitor   | 178102320 ENZASTAURIN                         | ENZASTAURIN               | chembl:CHEMBL300138  | 0.64  |
| PRKCB   | 5579 TdgClinicalTrial           | BRYOSTATIN                                    | BRYOSTATIN                | chembl:CHEMBL449158  | 1.06  |
| PRKCD   | 5580 DTC                        | TAE-684                                       | TAE-684                   | chembl:CHEMBL509032  | 0.02  |
| PRKCE   | 5581 DTC                        | PHORBOL MYRISTATE ACETATE                     | PHORBOL MYRISTATE ACETATE | chembl:CHEMBL279115  | 1.7   |
| PRKCG   | 5582 GuideToPharmacoinhibitor   | 178101947 RUBOXISTAURIN                       | RUBOXISTAURIN             | chembl:CHEMBL91829   | 0.38  |
| PRKCH   | 5583 GuideToPharmacoinhibitor   | 249565629 SOTRASTAUIN                         | SOTRASTAUIN               | chembl:CHEMBL565612  | 0.28  |
| PRKCI   | 5584 DTC                        | GSK-269962A                                   | GSK-269962A               | chembl:CHEMBL220241  | 0.14  |
| PRKCQ   | 5588 GuideToPharmacoinhibitor   | 329968392 PKC INHIBITOR 14                    |                           |                      |       |
| PRKCZ   | 5590 DTC                        | CENISERTIB                                    | CENISERTIB                | chembl:CHEMBL1967878 | 0.05  |
| PRKD1   | 5587 GuideToPharmacoinhibitor   | 178102596 GÖ 6976                             |                           |                      |       |
| PRKD2   | 25865 DTC                       | VER-49009                                     | CHEMBL365617              | chembl:CHEMBL365617  | 0.24  |
| PRKD3   | 23683 DTC                       | CENISERTIB                                    | CENISERTIB                | chembl:CHEMBL1967878 | 0.01  |
| PRKDC   | 5591 GuideToPharmacoinhibitor   | 252827496 TORIN 2                             |                           |                      |       |
| PRKG1   | 5592 DTC                        | GSK-269962A                                   | GSK-269962A               | chembl:CHEMBL220241  | 0.16  |
| PRKG2   | 5593 GuideToPharmacoinhibitor   | 249565864 COMPOUND 32 [PMID: 20471253]        |                           |                      |       |
| PRKX    | 5613 GuideToPharmacoinhibitor   | 178101884 GSK690693                           | GSK-690693                | chembl:CHEMBL494089  | 0.21  |
| PRL     | 5617 NCI                        | MANNITOL                                      | MANNITOL                  | chembl:CHEMBL689     | 0.64  |
| PRLHR   | 2834 GuideToPharmacagonist      | 135651864 PRRP-20                             |                           |                      |       |
| PRLR    | 5618 TTD                        | LFA-102                                       | LFA-102                   |                      |       |

|        |                         |              |                                        |                  |                      |       |
|--------|-------------------------|--------------|----------------------------------------|------------------|----------------------|-------|
| PRMT1  | 3276 DTC                | FURAMIDIN    | FURAMIDINE                             | FURAMIDINE       | chembl:CHEMBL24057   | 5.09  |
| PRMT3  | 10196 GuideToPharmac    | inhibitor    | 310264736 MS023                        |                  |                      |       |
| PRMT5  | 10419 GuideToPharmac    | inhibitor    | 336446913 LLY-283                      |                  |                      |       |
| PRMT6  | 55170 GuideToPharmac    | inhibitor    | 310264736 MS023                        |                  |                      |       |
| PRMT7  | 54496 GuideToPharmac    | inhibitor    | 252166606 DS-437                       |                  |                      |       |
| PRMT8  | 56341 GuideToPharmac    | inhibitor    | 310264736 MS023                        |                  |                      |       |
| PRNP   | 5621 DTC                | BREFELDIN    | BREFELDIN A                            | BREFELDIN A      | chembl:CHEMBL19980   | 9.09  |
| PROC   | 5624 TTD                | Sodium Tetra | Sodium Tetradecyl Sulfate              |                  |                      |       |
| PROCR  | 10544 TdgClinicalTrial  | GED-APC      | GED-APC                                |                  |                      |       |
| PROKR1 | 10887 GuideToPharmac    | agonist      | 252166719 IS1                          |                  |                      |       |
| PROKR2 | 128674 GuideToPharmac   | agonist      | 135651862 PROKINETICIN-2               |                  |                      |       |
| PROM1  | 8842 TTD                | CAR-T cells  | CAR-T cells targeting CD133            |                  |                      |       |
| PRORP  | 9692 PharmGKB           | zileuton     | zileuton                               | ZILEUTON         | chembl:CHEMBL93      | 15.91 |
| PROS1  | 5627 FDA                | Warfarin     | Warfarin                               | WARFARIN         | chembl:CHEMBL1464    | 0.59  |
| PROX1  | 5629 PharmGKB           | atenolol     | atenolol                               | ATENOLOL         | chembl:CHEMBL24      | 1.87  |
| PROZ   | 8858 TEND               | MENADION     | MENADIONE                              | MENADIONE        | chembl:CHEMBL590     | 6.82  |
| PRPF31 | 26121 PharmGKB          | metformin    | metformin                              | METFORMIN        | chembl:CHEMBL1431    | 3.35  |
| PRPS1  | 5631 CIViC              | THIOGUANIN   | THIOGUANINE                            | THIOGUANINE      | chembl:CHEMBL727     | 1.63  |
| PRRC2A | 7916 PharmGKB           | carbamazepir | carbamazepine                          | CARBAMAZEPINE    | chembl:CHEMBL108     | 0.9   |
| PRRT2  | 112476 MyCancerGenon    | inhibitor    | BRYOSTATIN                             | BRYOSTATIN       | chembl:CHEMBL449158  | 5.3   |
| PRSS1  | 5644 GuideToPharmac     | inhibitor    | 178101079 NAFAMOSTAT                   | NAFAMOSTAT       | chembl:CHEMBL273264  | 1.65  |
| PRSS2  | 5645 TdgClinicalTrial   | DERMOLAS     | DERMOLASTIN                            |                  |                      |       |
| PRSS3  | 5646 DTC                | CYANOPEP     | CYANOPEPTOLIN SS                       | CYANOPEPTOLIN SS | chembl:CHEMBL1076839 | 7.07  |
| PRSS53 | 339105 PharmGKB         | warfarin     | warfarin                               | WARFARIN         | chembl:CHEMBL1464    | 1.77  |
| PRSS8  | 5652 GuideToPharmac     | inhibitor    | 223366189 B3C                          |                  |                      |       |
| PRTN3  | 5657 GuideToPharmac     | inhibitor    | 252166826 COMPOUND 4G [PMID: 22595175] |                  |                      |       |
| PSCA   | 8000 TTD                | CAR-T Cells  | CAR-T Cells targeting PSCA             |                  |                      |       |
| PSEN1  | 5663 MyCancerGenon      | inhibitor    | MK0752                                 | MK0752           |                      |       |
| PSEN2  | 5664 TdgClinicalTrial   | BMS-299897   | BMS-299897                             | CHEMBL247471     | chembl:CHEMBL247471  | 1.77  |
| PSENEN | 55851 TALC              | inhibitor    | RO 4929097                             | RO 4929097       |                      |       |
| PSIP1  | 11168 TTD               | US9132129,   | US9132129, Cpd002                      |                  |                      |       |
| PSMA1  | 5682 ChemblInteractio   | inhibitor    | CHEMBL325                              | BORTEZOMIB       | chembl:CHEMBL325041  | 0.57  |
| PSMA2  | 5683 ChemblInteractio   | inhibitor    | CHEMBL354                              | IXAZOMIB CITRATE | chembl:CHEMBL3545432 | 0.34  |
| PSMA3  | 5684 MyCancerGenon      | inhibitor    | CARFILZOM                              | CARFILZOMIB      | chembl:CHEMBL451887  | 0.89  |
| PSMA4  | 5685 DTC                | CARFILZOM    | CARFILZOMIB                            | CARFILZOMIB      | chembl:CHEMBL451887  | 0.74  |
| PSMA5  | 5686 MyCancerGenon      | inhibitor    | CARFILZOM                              | CARFILZOMIB      | chembl:CHEMBL451887  | 0.89  |
| PSMA6  | 5687 ChemblInteractio   | inhibitor    | CHEMBL451                              | CARFILZOMIB      | chembl:CHEMBL451887  | 0.89  |
| PSMA7  | 5688 DTC                | BORTEZOM     | BORTEZOMIB                             | BORTEZOMIB       | chembl:CHEMBL325041  | 0.57  |
| PSMA8  | 143471 DTC              | CARFILZOM    | CARFILZOMIB                            | CARFILZOMIB      | chembl:CHEMBL451887  | 0.89  |
| PSMB1  | 5689 TdgClinicalTrial   | MLN-9708     | MLN-9708                               | IXAZOMIB CITRATE | chembl:CHEMBL3545432 | 0.56  |
| PSMB10 | 5699 MyCancerGenon      | inhibitor    | BORTEZOM                               | BORTEZOMIB       | chembl:CHEMBL325041  | 0.57  |
| PSMB11 | 122706 ChemblInteractio | inhibitor    | CHEMBL210                              | OPROZOMIB        | chembl:CHEMBL2103884 | 0.33  |

|          |                        |           |             |                      |                  |                      |      |
|----------|------------------------|-----------|-------------|----------------------|------------------|----------------------|------|
| PSMB2    | 5690 ChemblInteractio  | inhibitor | CHEMBL451   | CARFILZOMIB          | CARFILZOMIB      | chembl:CHEMBL451887  | 0.84 |
| PSMB3    | 5691 MyCancerGenon     | inhibitor | BORTEZOMB   | BORTEZOMIB           | BORTEZOMIB       | chembl:CHEMBL325041  | 0.57 |
| PSMB4    | 5692 ChemblInteractio  | inhibitor | CHEMBL210   | OPROZOMIB            | OPROZOMIB        | chembl:CHEMBL2103884 | 0.33 |
| PSMB5    | 5693 TdgClinicalTrial  |           | BORTEZOMB   | BORTEZOMIB           | BORTEZOMIB       | chembl:CHEMBL325041  | 0.51 |
| PSMB6    | 5694 MyCancerGenon     | inhibitor | CARFILZOM   | CARFILZOMIB          | CARFILZOMIB      | chembl:CHEMBL451887  | 0.89 |
| PSMB7    | 5695 MyCancerGenon     | inhibitor | CARFILZOM   | CARFILZOMIB          | CARFILZOMIB      | chembl:CHEMBL451887  | 0.89 |
| PSMB8    | 5696 MyCancerGenon     | inhibitor | CARFILZOM   | CARFILZOMIB          | CARFILZOMIB      | chembl:CHEMBL451887  | 0.7  |
| PSMB9    | 5698 DTC               |           | CARFILZOM   | CARFILZOMIB          | CARFILZOMIB      | chembl:CHEMBL451887  | 0.93 |
| PSMC1    | 5700 ChemblInteractio  | inhibitor | CHEMBL354   | IXAZOMIB CITRATE     | IXAZOMIB CITRATE | chembl:CHEMBL3545432 | 0.42 |
| PSMC1P1  | 151645 MyCancerGenon   | inhibitor | BORTEZOMB   | BORTEZOMIB           | BORTEZOMIB       | chembl:CHEMBL325041  | 0.35 |
| PSMC2    | 5701 ChemblInteractio  | inhibitor | CHEMBL325   | BORTEZOMIB           | BORTEZOMIB       | chembl:CHEMBL325041  | 0.71 |
| PSMC3    | 5702 MyCancerGenon     | inhibitor | BORTEZOMB   | BORTEZOMIB           | BORTEZOMIB       | chembl:CHEMBL325041  | 0.71 |
| PSMC3IP  | 29893 MyCancerGenon    | inhibitor | BORTEZOMB   | BORTEZOMIB           | BORTEZOMIB       | chembl:CHEMBL325041  | 0.35 |
| PSMC4    | 5704 DTC               |           | CARFILZOM   | CARFILZOMIB          | CARFILZOMIB      | chembl:CHEMBL451887  | 1.12 |
| PSMC5    | 5705 MyCancerGenon     | inhibitor | IXAZOMIB    | IXAZOMIB             | IXAZOMIB         | chembl:CHEMBL2141296 | 4.24 |
| PSMC6    | 5706 MyCancerGenon     | inhibitor | CARFILZOM   | CARFILZOMIB          | CARFILZOMIB      | chembl:CHEMBL451887  | 1.12 |
| PSMD1    | 5707 TdgClinicalTrial  |           | OPROZOMI    | OPROZOMIB            | OPROZOMIB        | chembl:CHEMBL2103884 | 0.82 |
| PSMD10   | 5716 MyCancerGenon     | inhibitor | BORTEZOMB   | BORTEZOMIB           | BORTEZOMIB       | chembl:CHEMBL325041  | 0.35 |
| PSMD10P1 | 170541 MyCancerGenon   | inhibitor | CARFILZOM   | CARFILZOMIB          | CARFILZOMIB      | chembl:CHEMBL451887  | 0.56 |
| PSMD10P2 | 280644 MyCancerGenon   | inhibitor | BORTEZOMB   | BORTEZOMIB           | BORTEZOMIB       | chembl:CHEMBL325041  | 0.35 |
| PSMD10P3 | 338091 MyCancerGenon   | inhibitor | BORTEZOMB   | BORTEZOMIB           | BORTEZOMIB       | chembl:CHEMBL325041  | 0.35 |
| PSMD11   | 5717 ChemblInteractio  | inhibitor | CHEMBL325   | BORTEZOMIB           | BORTEZOMIB       | chembl:CHEMBL325041  | 0.71 |
| PSMD12   | 5718 ChemblInteractio  | inhibitor | CHEMBL354   | IXAZOMIB CITRATE     | IXAZOMIB CITRATE | chembl:CHEMBL3545432 | 0.42 |
| PSMD13   | 5719 MyCancerGenon     | inhibitor | CARFILZOM   | CARFILZOMIB          | CARFILZOMIB      | chembl:CHEMBL451887  | 1.12 |
| PSMD14   | 10213 ChemblInteractio | inhibitor | CHEMBL451   | CARFILZOMIB          | CARFILZOMIB      | chembl:CHEMBL451887  | 0.41 |
| PSMD2    | 5708 ChemblInteractio  | inhibitor | CHEMBL354   | IXAZOMIB CITRATE     | IXAZOMIB CITRATE | chembl:CHEMBL3545432 | 0.84 |
| PSMD3    | 5709 MyCancerGenon     | inhibitor | BORTEZOMB   | BORTEZOMIB           | BORTEZOMIB       | chembl:CHEMBL325041  | 0.71 |
| PSMD4    | 5710 NCI               |           | PROTEASO    | PROTEASOME INHIBITOR |                  |                      |      |
| PSMD4P1  | 54035 MyCancerGenon    | inhibitor | BORTEZOMB   | BORTEZOMIB           | BORTEZOMIB       | chembl:CHEMBL325041  | 0.35 |
| PSMD5    | 5711 MyCancerGenon     | inhibitor | CARFILZOM   | CARFILZOMIB          | CARFILZOMIB      | chembl:CHEMBL451887  | 0.56 |
| PSMD6    | 9861 ChemblInteractio  | inhibitor | CHEMBL451   | CARFILZOMIB          | CARFILZOMIB      | chembl:CHEMBL451887  | 1.12 |
| PSMD7    | 5713 NCI               |           | PROTEASO    | PROTEASOME INHIBITOR |                  |                      |      |
| PSMD8    | 5714 MyCancerGenon     | inhibitor | BORTEZOMB   | BORTEZOMIB           | BORTEZOMIB       | chembl:CHEMBL325041  | 0.71 |
| PSMD9    | 5715 MyCancerGenon     | inhibitor | BORTEZOMB   | BORTEZOMIB           | BORTEZOMIB       | chembl:CHEMBL325041  | 0.35 |
| PSME1    | 5720 MyCancerGenon     | inhibitor | BORTEZOMB   | BORTEZOMIB           | BORTEZOMIB       | chembl:CHEMBL325041  | 0.35 |
| PSME2    | 5721 MyCancerGenon     | inhibitor | CARFILZOM   | CARFILZOMIB          | CARFILZOMIB      | chembl:CHEMBL451887  | 0.56 |
| PSME2P2  | 338099 MyCancerGenon   | inhibitor | BORTEZOMB   | BORTEZOMIB           | BORTEZOMIB       | chembl:CHEMBL325041  | 0.35 |
| PSME3    | 10197 MyCancerGenon    | inhibitor | BORTEZOMB   | BORTEZOMIB           | BORTEZOMIB       | chembl:CHEMBL325041  | 0.35 |
| PSME4    | 23198 MyCancerGenon    | inhibitor | BORTEZOMB   | BORTEZOMIB           | BORTEZOMIB       | chembl:CHEMBL325041  | 0.35 |
| PSMF1    | 9491 MyCancerGenon     | inhibitor | BORTEZOMB   | BORTEZOMIB           | BORTEZOMIB       | chembl:CHEMBL325041  | 0.35 |
| PSORS1C1 | 170679 PharmGKB        |           | carboplatin | carboplatin          | CARBOPLATIN      | chembl:CHEMBL1351    | 0.4  |
| PSORS1C3 | 100130889 PharmGKB     |           | allopurinol | allopurinol          | ALLOPURINOL      | chembl:CHEMBL1467    | 4.39 |

|        |                                 |                                                  |                       |                      |       |
|--------|---------------------------------|--------------------------------------------------|-----------------------|----------------------|-------|
| PSPH   | 5723 PharmGKB                   | l-methionine l-methionine                        | METHIONINE            | chembl:CHEMBL42336   | 25.46 |
| PTAFR  | 5724 GuideToPharmac antagonist  | 178102699 BEPAFANT                               | BEPAFANT              | chembl:CHEMBL325439  | 4.9   |
| PTBP1  | 5725 DTC                        | MMV085203MMV085203                               | CHEMBL586031          | chembl:CHEMBL586031  | 0.82  |
| PTCH1  | 5727 CIViC                      | SONIDE GIB SONIDE GIB                            | SONIDE GIB            | chembl:CHEMBL2105737 | 19.1  |
| PTEN   | 5728 CIViC                      | PI3KBETA IIPI3KBETA INHIBITOR AZD8186            |                       |                      |       |
| PTGDR  | 5729 TTD                        | PGF2alpha PGF2alpha                              |                       |                      |       |
| PTGDR2 | 11251 GuideToPharmac agonist    | 135650390 INDOMETHACIN                           | INDOMETHACIN          | chembl:CHEMBL6       | 0.37  |
| PTGDS  | 5730 NCI                        | HORMONESHORMONES                                 |                       |                      |       |
| PTGER1 | 5731 TTD                        | AS-013 AS-013                                    | ECRAPROST             | chembl:CHEMBL2104574 | 3.54  |
| PTGER2 | 5732 GuideToPharmac agonist     | 135651569 [3H]PGE2                               |                       |                      |       |
| PTGER3 | 5733 GuideToPharmac agonist     | 135650113 CLOPROSTENOL                           | CLOPROSTENOL          | chembl:CHEMBL37853   | 0.8   |
| PTGER4 | 5734 TdgClinicalTrial           | DINOPROSTIDINOPROSTONE                           | DINOPROSTONE          | chembl:CHEMBL548     | 2.72  |
| PTGES  | 9536 TTD                        | Benzamide dBenzamide derivative 14               |                       |                      |       |
| PTGES2 | 80142 GuideToPharmac inhibitor  | 252827470 COMPOUND 30 [PMID: 15953724]           |                       |                      |       |
| PTGES3 | 10728 NCI                       | GENISTEIN GENISTEIN                              | GENISTEIN             | chembl:CHEMBL44      | 0.79  |
| PTGFR  | 5737 GuideToPharmac agonist     | 135651094 SULPROSTONE                            | SULPROSTONE           | chembl:CHEMBL1472830 | 1.25  |
| PTGIR  | 5739 TTD                        | Misoprostol Misoprostol                          | MISOPROSTOL           | chembl:CHEMBL606     | 3.74  |
| PTGIS  | 5740 TEND                       | PHENYLBU PHENYL BUTAZONE                         | PHENYL BUTAZONE       | chembl:CHEMBL101     | 37.13 |
| PTGS1  | 5742 ChemblInteractio inhibitor | CHEMBL95(SUPROFEN                                | SUPROFEN              | chembl:CHEMBL956     | 4.82  |
| PTGS2  | 5743 TTD                        | Tolmetin Tolmetin                                | TOLMETIN              | chembl:CHEMBL1020    | 2.17  |
| PTH    | 5741 NCI                        | PUROMYCIPUROMYCIN                                | PUROMYCIN             | chembl:CHEMBL469912  | 0.94  |
| PTH1R  | 5745 DTC                        | 9-AMINOC A9-AMINOCAMPTOTHECIN9-AMINOCAMPTOTHECIN |                       | chembl:CHEMBL274070  | 0.64  |
| PTH2R  | 5746 GuideToPharmac agonist     | 135652417 TERIPARATIDE                           | TERIPARATIDE          | chembl:CHEMBL525610  | 7.07  |
| PTHLH  | 5744 NCI                        | MAGNESIU M MAGNESIUM SULFATE                     |                       |                      |       |
| PTK2   | 5747 DTC                        | DNDI141746DNDI1417467                            | CHEMBL1997335         | chembl:CHEMBL1997335 | 0.06  |
| PTK2B  | 2185 TTD                        | PMID277748PMID27774822-Compound-Figure10Example1 |                       |                      |       |
| PTK6   | 5753 GuideToPharmac inhibitor   | 249565866 COMPOUND 19A [PMID: 21855335]          |                       |                      |       |
| PTK7   | 5754 TTD                        | PF-06647020PF-06647020                           | COFETUZUMAB PELIDOTIN | chembl:CHEMBL3989983 | 63.65 |
| PTMA   | 5757 TdgClinicalTrial           | THYMALFATHYMALFASIN                              | THYMALFASIN           | chembl:CHEMBL2103979 | 63.65 |
| PTP4A1 | 7803 NCI                        | HALOFUGINHALOFUGINONE                            | HALOFUGINONE          | chembl:CHEMBL1197091 | 21.22 |
| PTP4A3 | 11156 CIViC                     | CETUXIMA I CETUXIMAB                             | CETUXIMAB             | chembl:CHEMBL1201577 | 1.48  |
| PTPA   | 5524 TTD                        | LB-100 LB-100                                    | LB-100                | chembl:CHEMBL4297300 | 21.22 |
| PTPN1  | 5770 GuideToPharmac inhibitor   | 252827507 COMPOUND 7B [HAFTCHENARY ET AL., 2013] |                       |                      |       |
| PTPN11 | 5781 JAX-CKB                    | II-B08 II-B08                                    |                       |                      |       |
| PTPN12 | 5782 CIViC                      | CRIZOTINIECRIZOTINIB                             | CRIZOTINIB            | chembl:CHEMBL601719  | 2.36  |
| PTPN13 | 5783 NCI                        | ANTIESTROANTIESTROGENS                           |                       |                      |       |
| PTPN22 | 26191 DTC                       | GNF-PF-227;GNF-PF-2272                           | CHEMBL601757          | chembl:CHEMBL601757  | 0.33  |
| PTPN4  | 5775 TEND                       | ALENDRONALENDRONATE                              | ALENDRONIC ACID       | chembl:CHEMBL870     | 7.96  |
| PTPN5  | 84867 DTC                       | MESO-2,3-D MESO-2,3-DIMERCAPTOSI                 | CHEMBL28721           | chembl:CHEMBL28721   | 10.61 |
| PTPN6  | 5777 TTD                        | BDBM50054BDBM50054344                            |                       |                      |       |
| PTPN7  | 5778 DTC                        | PROSTAGL PROSTAGLANDIN A2                        | PROSTAGLANDIN A2      | chembl:CHEMBL1084643 | 0.96  |
| PTPRB  | 5787 TTD                        | AKB-9778 AKB-9778                                | RAZUPROTAFIB          | chembl:CHEMBL3931971 | 15.91 |

|          |                        |               |                             |                                        |                      |                      |      |
|----------|------------------------|---------------|-----------------------------|----------------------------------------|----------------------|----------------------|------|
| PTPRC    | 5788 TTD               | [131I]-BC8    | [131I]-BC8                  |                                        |                      |                      |      |
| PTPRD    | 5789 TTD               | US9340574,    | US9340574, 7                |                                        |                      |                      |      |
| PTPRF    | 5792 CIViC             | ERLOTINIB     | ERLOTINIB                   | ERLOTINIB HYDROCHLORIDE                |                      |                      |      |
| PTPRG    | 5793 GuideToPharmac    | inhibitor     | 252827488                   | COMPOUND 1 [PMID: 21882820]            |                      |                      |      |
| PTPRM    | 5797 PharmGKB          | methotrexate  | methotrexate                | METHOTREXATE                           | chembl:CHEMBL34259   | 1.18                 |      |
| PTPRS    | 5802 GuideToPharmac    | inhibitor     | 252827507                   | COMPOUND 7B [HAFTCHENARY ET AL., 2013] |                      |                      |      |
| PTPRZ1   | 5803 NCI               | RETINOIC      | ARETINOIC                   | ACID                                   |                      |                      |      |
| PURA     | 5813 PharmGKB          | methylphenid  | methylphenidate             | METHYLPHENIDATE                        | chembl:CHEMBL796     | 2.83                 |      |
| PVALB    | 5816 NCI               | SALINE        | SALINE                      | SODIUM CHLORIDE                        | chembl:CHEMBL1200574 | 9.09                 |      |
| PVT1     | 5820 NCI               | GLIVEC        | GLIVEC                      | GLIVEC                                 | wikidata:Q29005907   | 127.3                |      |
| PXN      | 5829 NCI               | H2O2          | H2O2                        |                                        |                      |                      |      |
| PYGB     | 5834 TdgClinicalTrial  | PSN357        | PSN357                      |                                        |                      |                      |      |
| PYGL     | 5836 PharmGKB          | dexamethasoid | dexamethasone               | DEXAMETHASONE                          | chembl:CHEMBL384467  | 0.51                 |      |
| PYGM     | 5837 NCI               | RU 486        | RU 486                      |                                        |                      |                      |      |
| PYY      | 5697 TTD               | Peptide YY 3  | Peptide YY 3-36             |                                        |                      |                      |      |
| PZP      | 5858 NCI               | DEXAMETH      | DEXAMETHASONE               | DEXAMETHASONE                          | chembl:CHEMBL384467  | 0.38                 |      |
| QPCT     | 25797 TTD              | PQ-912        | PQ-912                      |                                        |                      |                      |      |
| QPRT     | 23475 TdgClinicalTrial | ARI-3037      | MCARI-3037                  | MO                                     |                      |                      |      |
| QRFPR    | 84109 GuideToPharmac   | agonist       | 178102518                   | QRFP26                                 |                      |                      |      |
| RAB27A   | 5873 GuideToPharmac    | inhibitor     | 328083519                   | NEXINHIB20                             |                      |                      |      |
| RAB5A    | 5868 NCI               | HGF           | HGF                         |                                        |                      |                      |      |
| RAB9A    | 9367 DTC               | NSC-234945    | NSC-234945                  | CHEMBL260311                           | chembl:CHEMBL260311  | 0.04                 |      |
| RABEP1   | 9135 PharmGKB          | lithium       | lithium                     | LITHIUM                                | chembl:CHEMBL2146126 | 0.31                 |      |
| RABGAP1L | 9910 PharmGKB          | ethanol       | ethanol                     | ALCOHOL                                | chembl:CHEMBL545     | 0.74                 |      |
| RAC1     | 5879 CIViC             | VEMURAFE      | VEMURAFENIB                 | VEMURAFENIB                            | chembl:CHEMBL1229517 | 0.8                  |      |
| RAC2     | 5880 PharmGKB          | idarubicin    | idarubicin                  | IDARUBICIN                             | chembl:CHEMBL1117    | 1.77                 |      |
| RACGAP1  | 29127 DTC              | TCMDC-124     | TCMDC-124522                | CHEMBL526776                           | chembl:CHEMBL526776  | 0.23                 |      |
| RAD21    | 5885 JAX-CKB           | N/A           | N/A                         |                                        |                      |                      |      |
| RAD50    | 10111 CIViC            | CHECKPOINT    | CHECKPOINT KINASE INHIBITOR | AZD7762                                |                      |                      |      |
| RAD51    | 5888 TdgClinicalTrial  | AMUVATIN      | AMUVATINIB                  | AMUVATINIB                             | chembl:CHEMBL2103851 | 9.09                 |      |
| RAD52    | 5893 DTC               | R(-)-APOC     | R(-)-APOCODEINE HCL         | CHEMBL1256735                          | chembl:CHEMBL1256735 | 0.24                 |      |
| RAD54L   | 8438 DTC               | ACRIDIN-1-    | ACRIDIN-1-YLAMINE           | CHEMBL146525                           | chembl:CHEMBL146525  | 0.19                 |      |
| RAF1     | 5894 TdgClinicalTrial  | SORAFENIB     | SORAFENIB                   | SORAFENIB                              | chembl:CHEMBL1336    | 0.47                 |      |
| RALA     | 5898 NCI               | VITAMIN E     | VITAMIN E                   |                                        |                      |                      |      |
| RALBP1   | 10928 PharmGKB         | carbamazepir  | carbamazepine               | CARBAMAZEPINE                          | chembl:CHEMBL108     | 1.35                 |      |
| RAMP1    | 10267 TEND             | PRAMLINTI     | PRAMLINTIDE                 | PRAMLINTIDE                            | chembl:CHEMBL2103758 | 42.43                |      |
| RAMP2    | 10266 ChemblInteractio | agonist       | CHEMBL38:PRAMLINTIDE        | ACETATE                                | PRAMLINTIDE ACETATE  | chembl:CHEMBL3833353 | 7.96 |
| RAMP3    | 10268 TEND             | PRAMLINTI     | PRAMLINTIDE                 | PRAMLINTIDE                            | chembl:CHEMBL2103758 | 42.43                |      |
| RAPGEF3  | 10411 DTC              | CRYPTOTA      | CRYPTOTANSHINONE            | CRYPTOTANSHINONE                       | chembl:CHEMBL187460  | 0.14                 |      |
| RAPGEF4  | 11069 DTC              | CLOTRIMA      | CLOTRIMAZOLE                | CLOTRIMAZOLE                           | chembl:CHEMBL104     | 0.04                 |      |
| RAPGEF5  | 9771 PharmGKB          | antidepressan | antidepressants             |                                        |                      |                      |      |
| RARA     | 5914 GuideToPharmac    | agonist       | 135650006                   | BMS753                                 |                      |                      |      |

|         |                                |                                                       |                |  |                      |       |
|---------|--------------------------------|-------------------------------------------------------|----------------|--|----------------------|-------|
| RARB    | 5915 GuideToPharmacagonist     | 53801005 CD666                                        |                |  |                      |       |
| RARG    | 5916 TTD                       | PMID273362PMID27336223-Compound-12                    |                |  |                      |       |
| RARRES1 | 5918 TEND                      | TRETINOIN TRETINOIN                                   | TRETINOIN      |  | chembl:CHEMBL38      | 5.79  |
| RARS1   | 5917 PharmGKB                  | cisplatin cisplatin                                   | CISPLATIN      |  | chembl:CHEMBL11359   | 0.88  |
| RASA1   | 5921 CIViC                     | TRAMETINITRAMETINIB                                   | TRAMETINIB     |  | chembl:CHEMBL2103875 | 3.03  |
| RASGRP1 | 10125 DTC                      | PHORBOL MPHORBOL MYRISTATE ACPHORBOL MYRISTATE ACETAT |                |  | chembl:CHEMBL279115  | 12.73 |
| RASGRP3 | 25780 DTC                      | PHORBOL MPHORBOL MYRISTATE ACPHORBOL MYRISTATE ACETAT |                |  | chembl:CHEMBL279115  | 19.1  |
| RB1     | 5925 JAX-CKB                   | Trilaciclib Trilaciclib                               | TRILACICLIB    |  | chembl:CHEMBL3894860 | 0.96  |
| RBBP9   | 10741 GuideToPharmac           | inhibitor 252166808 ALA(1-NAPH)-PRO-CN                |                |  |                      |       |
| RBFOX1  | 54715 PharmGKB                 | antineoplasticantineoplastic agents                   |                |  |                      |       |
| RBL1    | 5933 NCI                       | HMBA HMBA                                             |                |  |                      |       |
| RBL2    | 5934 NCI                       | RAPAMYCIRAPAMYCIN                                     | SIROLIMUS      |  | chembl:CHEMBL413     | 2.27  |
| RBMS3   | 27303 PharmGKB                 | BisphosphonaBisphosphonates                           |                |  |                      |       |
| RBP3    | 5949 NCI                       | RETINOL RETINOL                                       | RETINOL        |  | chembl:CHEMBL986     | 13.64 |
| RBP4    | 5950 TTD                       | US8853215, US8853215, 3                               |                |  |                      |       |
| RBX1    | 9978 ChemblInteractio          | inhibitor CHEMBL468THALIDOMIDE                        | THALIDOMIDE    |  | chembl:CHEMBL468     | 0.3   |
| RCE1    | 9986 DTC                       | NSC-37136 NSC-37136                                   | CHEMBL1370674  |  | chembl:CHEMBL1370674 | 3.03  |
| RCSD1   | 92241 CIViC                    | IMATINIB IMATINIB                                     | IMATINIB       |  | chembl:CHEMBL941     | 1.99  |
| RECQL   | 5965 DTC                       | PURPURIN PURPURIN                                     | PURPURIN       |  | chembl:CHEMBL294264  | 0.02  |
| REEP5   | 7905 PharmGKB                  | sertraline sertraline                                 | SERTRALINE     |  | chembl:CHEMBL809     | 1.52  |
| REG1A   | 5967 NCI                       | LINOMIDE LINOMIDE                                     | ROQUINIMEX     |  | chembl:CHEMBL11672   | 31.83 |
| REG3A   | 5068 TTD                       | ALF-5755 ALF-5755                                     |                |  |                      |       |
| RELA    | 5970 DTC                       | PYROGALLPYROGALLOL RED                                | PYROGALLOL RED |  | chembl:CHEMBL210208  | 0.1   |
| REN     | 5972 TdgClinicalTrial          | SPP635 SPP635                                         |                |  |                      |       |
| RET     | 5979 CIViC                     | SORAFENIBSORAFENIB                                    | SORAFENIB      |  | chembl:CHEMBL1336    | 0.15  |
| REV1    | 51455 PharmGKB                 | cisplatin cisplatin                                   | CISPLATIN      |  | chembl:CHEMBL11359   | 0.44  |
| REV3L   | 5980 PharmGKB                  | fluorouracil fluorouracil                             | FLUOROURACIL   |  | chembl:CHEMBL185     | 0.2   |
| RFC1    | 5981 ClarityFoundationClinical | PRALATREPRALATREXATE                                  | PRALATREXATE   |  | chembl:CHEMBL1201746 | 21.22 |
| RFK     | 55312 PharmGKB                 | escitalopram escitalopram                             | ESCITALOPRAM   |  | chembl:CHEMBL1508    | 1.77  |
| RFPL4B  | 442247 PharmGKB                | o-desmethylo-desmethyltramadol                        |                |  |                      |       |
| RGL4    | 266747 PharmGKB                | o-desmethylo-desmethyltramadol                        |                |  |                      |       |
| RGMA    | 56963 TTD                      | Elezanumab Elezanumab                                 | ELEZANUMAB     |  | chembl:CHEMBL4297743 | 127.3 |
| RGS12   | 6002 DTC                       | LAVENDUS LAVENDUSTIN C                                | LAVENDUSTIN C  |  | chembl:CHEMBL319620  | 2.65  |
| RGS16   | 6004 TTD                       | s2901 s2901                                           |                |  |                      |       |
| RGS17   | 26575 PharmGKB                 | antidepressanantidepressants                          |                |  |                      |       |
| RGS19   | 10287 PharmGKB                 | opioids opioids                                       |                |  |                      |       |
| RGS2    | 5997 PharmGKB                  | haloperidol haloperidol                               | HALOPERIDOL    |  | chembl:CHEMBL54      | 1.79  |
| RGS4    | 5999 DTC                       | METHYLDCMETHYLDOPA                                    | METHYLDOPA     |  | chembl:CHEMBL459     | 0.02  |
| RGS5    | 8490 PharmGKB                  | irinotecan irinotecan                                 | IRINOTECAN     |  | chembl:CHEMBL481     | 0.6   |
| RGS8    | 85397 GuideToPharmac           | inhibitor 249565573 CCG-50014                         | CHEMBL1917204  |  | chembl:CHEMBL1917204 | 21.22 |
| RHAG    | 6005 GuideToPharmacology       | 178101342 [14C]METHYLAMINE                            |                |  |                      |       |
| RHBDF2  | 79651 PharmGKB                 | opioids opioids                                       |                |  |                      |       |

|          |                        |           |                                                                              |                           |                      |        |
|----------|------------------------|-----------|------------------------------------------------------------------------------|---------------------------|----------------------|--------|
| RHD      | 6007 ChemblInteractio  | inhibitor | CHEMBL21(ROZROLIMUPAB                                                        | ROZROLIMUPAB              | chembl:CHEMBL2107859 | 21.22  |
| RHEB     | 6009 DTC               |           | 4,4'-HYDRO,4,4'-HYDROXYBIPHENYL                                              | CHEMBL76398               | chembl:CHEMBL76398   | 63.65  |
| RHO      | 6010 TTD               |           | VX-210 VX-210                                                                |                           |                      |        |
| RHOA     | 387 PharmGKB           |           | pravastatin pravastatin                                                      | PRAVASTATIN               | chembl:CHEMBL1144    | 0.91   |
| RHOB     | 388 DTC                |           | TRIMETHYITRIMETHYL-[3-(TETRADE                                               | TRIMETHYL-[3-(TETRADECANE | chembl:CHEMBL2436861 | 63.65  |
| RICTOR   | 253260 MyCancerGenon   | inhibitor | MLN0128 MLN0128                                                              | SAPANISERTIB              | chembl:CHEMBL3545097 | 0.69   |
| RIPK1    | 8737 GuideToPharmac    | inhibitor | 340590273 RIPA-56                                                            |                           |                      |        |
| RIPK2    | 8767 GuideToPharmac    | inhibitor | 315661219 GSK583                                                             |                           |                      |        |
| RIPK3    | 11035 GuideToPharmac   | inhibitor | 384403680 RIPK3 INHIBITOR 42                                                 |                           |                      |        |
| RIPOR2   | 9750 PharmGKB          |           | rifampin rifampin                                                            | RIFAMPIN                  | chembl:CHEMBL374478  | 6.06   |
| RIT1     | 6016 CIViC             |           | PICTILISIB PICTILISIB                                                        | PICTILISIB                | chembl:CHEMBL521851  | 2.12   |
| RLN2     | 6019 NCI               |           | NEOMYCIN NEOMYCIN                                                            | NEOMYCIN                  | chembl:CHEMBL3989751 | 25.46  |
| RNASE1   | 6035 DTC               |           | CYTIDINE 3' CYTIDINE 3'-PHOSPHATE                                            | CHEMBL258728              | chembl:CHEMBL258728  | 318.26 |
| RNASEH2A | 10535 NCI              |           | PROGESTEPROGESTERONE                                                         | PROGESTERONE              | chembl:CHEMBL103     | 0.88   |
| RNASEL   | 6041 DTC               |           | C-5966451 C-5966451                                                          | CHEMBL259819              | chembl:CHEMBL259819  | 63.65  |
| RNF112   | 7732 NCI               |           | ETHANOL ETHANOL                                                              | ALCOHOL                   | chembl:CHEMBL545     | 1.48   |
| RNF43    | 54894 TTD              |           | RNF43-721 RNF43-721                                                          |                           |                      |        |
| RNF8     | 9025 PharmGKB          |           | carboplatin carboplatin                                                      | CARBOPLATIN               | chembl:CHEMBL1351    | 0.54   |
| RNPEP    | 6051 ChemblInteractio  | inhibitor | CHEMBL21(TOSEDOSTAT                                                          | TOSEDOSTAT                | chembl:CHEMBL2103847 | 3.35   |
| RNPEPL1  | 57140 ChemblInteractio | inhibitor | CHEMBL21(TOSEDOSTAT                                                          | TOSEDOSTAT                | chembl:CHEMBL2103847 | 3.35   |
| ROCK1    | 6093 GuideToPharmac    | inhibitor | 336446944 BELUMOSUDIL                                                        |                           |                      |        |
| ROCK2    | 9475 GuideToPharmac    | inhibitor | 178102655 RHO KINASE INHIBITOR IV                                            |                           |                      |        |
| ROR1     | 4919 TTD               |           | CirmtuzumabCirmtuzumab                                                       | CIRMTUZUMAB               | chembl:CHEMBL4297728 | 63.65  |
| ROR2     | 4920 TTD               |           | CCT301-59 (CCT301-59 (targeting ROR2)                                        |                           |                      |        |
| RORA     | 6095 PharmGKB          |           | interferon betinterferon beta-1a                                             |                           |                      |        |
| RORB     | 6096 TTD               |           | US9598431, :US9598431, 5                                                     |                           |                      |        |
| RORC     | 6097 DTC               |           | DOMIPHEN DOMIPHEN BROMIDE                                                    | DOMIPHEN BROMIDE          | chembl:CHEMBL486696  | 0.1    |
| ROS1     | 6098 TTD               |           | Imidazo[1,2-Imidazo[1,2-b]pyridazine derivative 2                            |                           |                      |        |
| RPA1     | 6117 DTC               |           | NSC-15520 NSC-15520                                                          | CHEMBL1765371             | chembl:CHEMBL1765371 | 127.3  |
| RPE65    | 6121 TTD               |           | AAV2-hRPEAAV2-hRPE65v2                                                       | VORETIGENE NEPARVOVEC     | chembl:CHEMBL3707275 | 21.22  |
| RPL10    | 6134 NCI               |           | TRANSFORTRANSFORMING GROWTH FACTOR                                           |                           |                      |        |
| RPL13    | 6137 PharmGKB          |           | docetaxel docetaxel                                                          | DOCETAXEL                 | chembl:CHEMBL92      | 0.81   |
| RPS19    | 6223 NCI               |           | VITAMIN A VITAMIN A                                                          |                           |                      |        |
| RPS2     | 6187 NCI               |           | FGF3 FGF3                                                                    |                           |                      |        |
| RPS6KA1  | 6195 TTD               |           | 1,6-diazanapl1,6-diazanaphthalenes and pyrido[2,3-d] pyrimidine derivative 1 |                           |                      |        |
| RPS6KA2  | 6196 TTD               |           | BI-D1870 BI-D1870                                                            | CHEMBL573107              | chembl:CHEMBL573107  | 31.83  |
| RPS6KA3  | 6197 GuideToPharmac    | inhibitor | 249565819 COMPOUND 25B [PMID: 22564207]                                      |                           |                      |        |
| RPS6KA4  | 8986 DTC               | inhibitor | HESPERADIHESPERADIN                                                          | HESPERADIN                | chembl:CHEMBL514409  | 0.8    |
| RPS6KA5  | 9252 DTC               |           | PHA-767491 PHA-767491                                                        | CHEMBL225519              | chembl:CHEMBL225519  | 0.12   |
| RPS6KA6  | 27330 GuideToPharmac   | inhibitor | 249565632 AT-9283                                                            | AT-9283                   | chembl:CHEMBL495727  | 1.63   |
| RPS6KB1  | 6198 ChemblInteractio  | inhibitor | CHEMBL35-LY-2780301                                                          | LY-2780301                | chembl:CHEMBL3545134 | 0.4    |
| RPS6KB2  | 6199 ChemblInteractio  | inhibitor | CHEMBL35-MSC-2363318A                                                        | MSC-2363318A              | chembl:CHEMBL3545003 | 3.54   |

|         |                                  |                               |                                |                     |                      |       |
|---------|----------------------------------|-------------------------------|--------------------------------|---------------------|----------------------|-------|
| RPSA    | 3921 TTD                         | PMID257470                    | PMID25747044-Compound-miRNA    |                     |                      |       |
| RPTOR   | 57521 PharmGKB                   | everolimus                    | everolimus                     | EVEROLIMUS          | chembl:CHEMBL1908360 | 0.41  |
| RRAS2   | 22800 PharmGKB                   | tamoxifen                     | tamoxifen                      | TAMOXIFEN           | chembl:CHEMBL83      | 2.16  |
| RRM1    | 6240 CIViC                       | VINORELBIN                    | VINORELBINE                    | VINORELBINE         | chembl:CHEMBL553025  | 0.52  |
| RRM2    | 6241 ChEMBLInteractionInhibitor  | CHEMBL467                     | HYDROXYUREA                    | HYDROXYUREA         | chembl:CHEMBL467     | 1.05  |
| RRM2B   | 50484 ChEMBLInteractionInhibitor | CHEMBL12                      | (GALLIUM NITRATE)              | GALLIUM NITRATE     | chembl:CHEMBL1200983 | 2.36  |
| RRP1B   | 23076 PharmGKB                   | atenolol                      | atenolol                       | ATENOLOL            | chembl:CHEMBL24      | 3.74  |
| RRP7A   | 27341 PharmGKB                   | methylphenidate               | methylphenidate                | METHYLPHENIDATE     | chembl:CHEMBL796     | 2.83  |
| RSPO1   | 284654 TTD                       | NU-206                        | NU-206                         |                     |                      |       |
| RSPO3   | 84870 TTD                        | Rosmuntuzumab                 | Rosmuntuzumab                  | ROSMANTUZUMAB       | chembl:CHEMBL3990031 | 63.65 |
| RTKN2   | 219790 PharmGKB                  | haloperidol                   | haloperidol                    | HALOPERIDOL         | chembl:CHEMBL54      | 1.79  |
| RTN4    | 57142 NCI                        | HYPERBARIC OXYGEN             | HYPERBARIC OXYGEN              |                     |                      |       |
| RUNX1   | 861 DTC                          | FUMARPROTETRIC ACID           | FUMARPROTETRIC ACID            | FUMARPROTETRIC ACID | chembl:CHEMBL366861  | 0.15  |
| RUNX2   | 860 NCI                          | ANTISENSE OLIGONUCLEOTIDES    | ANTISENSE OLIGONUCLEOTIDES     |                     |                      |       |
| RUNX3   | 864 NCI                          | LEUCOVORIN                    | LEUCOVORIN                     | LEUCOVORIN          | chembl:CHEMBL1679    | 2.27  |
| RXFP1   | 59350 GuideToPharmacagonist      | 135652435                     | RELAXIN                        | RELAXIN             | chembl:CHEMBL2107882 | 1.52  |
| RXFP2   | 122042 GuideToPharmacagonist     | 135652522                     | [125I]INSL3 (HUMAN)            |                     |                      |       |
| RXFP3   | 51289 GuideToPharmacagonist      | 252166548                     | MINIMISED RELAXIN-3 ANALOGUE 2 |                     |                      |       |
| RXFP4   | 339403 GuideToPharmacagonist     | 252166562                     | INSL5 AMIDE (HUMAN)            |                     |                      |       |
| RXRA    | 6256 TEND                        | ALITRETINOL                   | ALITRETINOL                    | ALITRETINOL         | chembl:CHEMBL705     | 1.45  |
| RXRB    | 6257 TdgClinicalTrial            | TRETINOIN                     | TRETINOIN                      | TRETINOIN           | chembl:CHEMBL38      | 1.5   |
| RXRG    | 6258 ChEMBLInteractionagonist    | CHEMBL705                     | ALITRETINOL                    | ALITRETINOL         | chembl:CHEMBL705     | 8.84  |
| RYR1    | 6261 FDA                         | Sevoflurane                   | Sevoflurane                    | SEVOFLURANE         | chembl:CHEMBL1200694 | 13.26 |
| RYR2    | 6262 TTD                         | Dantrolene                    | Dantrolene                     | DANTROLENE          | chembl:CHEMBL1201288 | 0.71  |
| RYR3    | 6263 GuideToPharmacactivator     | 135652675                     | CAFFEINE                       | CAFFEINE            | chembl:CHEMBL113     | 0.42  |
| S100A10 | 6281 NCI                         | GONADOTROPINS                 | GONADOTROPINS                  |                     |                      |       |
| S100A12 | 6283 TTD                         | Atogepant                     | Atogepant                      | ATOGE Pant          | chembl:CHEMBL3991065 | 12.73 |
| S100A2  | 6273 NCI                         | ANTISENSE OLIGONUCLEOTIDES    | ANTISENSE OLIGONUCLEOTIDES     |                     |                      |       |
| S100A4  | 6275 TTD                         | SP-MET-1                      | SP-MET-1                       |                     |                      |       |
| S100A8  | 6279 NCI                         | MTX                           | MTX                            | METHOTREXATE        | chembl:CHEMBL34259   | 1.18  |
| S100A9  | 6280 TTD                         | Paquinimod                    | Paquinimod                     | PAQUINIMOD          | chembl:CHEMBL67776   | 31.83 |
| S100B   | 6285 NCI                         | STREPTOZOCIN                  | STREPTOZOCIN                   | STREPTOZOCIN        | chembl:CHEMBL1651906 | 1.38  |
| S1PR1   | 1901 TTD                         | Fingolimod                    | Fingolimod                     | FINGOLIMOD          | chembl:CHEMBL314854  | 7.58  |
| S1PR2   | 9294 GuideToPharmacagonist       | 329968432                     | COMPOUND 43 [PMID: 26751273]   |                     |                      |       |
| S1PR3   | 1903 TTD                         | US8563594, US8563594, 152     |                                |                     |                      |       |
| S1PR4   | 8698 GuideToPharmacagonist       | 178103571                     | VPC03090-P                     |                     |                      |       |
| S1PR5   | 53637 GuideToPharmacagonist      | 318164808                     | SIPONIMOD                      | SIPONIMOD           | chembl:CHEMBL2336071 | 7.96  |
| SAA1    | 6288 NCI                         | IL-1RA                        | IL-1RA                         | ANAKINRA            | chembl:CHEMBL1201570 | 7.96  |
| SACM1L  | 22908 PharmGKB                   | bupropion                     | bupropion                      | BUPROPION           | chembl:CHEMBL894     | 7.49  |
| SAE1    | 10055 DTC                        | 4-PHENYLAMINO-1,2-NAPHTHALENE | 4-PHENYLAMINO-1,2-NAPHTHALENE  | CHEMBL299853        | chembl:CHEMBL299853  | 0.44  |
| SAG     | 6295 NCI                         | BROMOCRIPTINE                 | BROMOCRIPTINE                  | BROMOCRIPTINE       | chembl:CHEMBL493     | 0.91  |
| SAMD3   | 154075 NCI                       | TGFBETA1                      | TGFBETA1                       |                     |                      |       |

|         |                          |                                          |                         |                      |       |
|---------|--------------------------|------------------------------------------|-------------------------|----------------------|-------|
| SAMHD1  | 25939 PharmGKB           | stavudine stavudine                      | STAVUDINE               | chembl:CHEMBL991     | 9.09  |
| SAP130  | 79595 DTC                | SPLICEOST,SPLICEOSTATIN-A                | CHEMBL1221944           | chembl:CHEMBL1221944 | 42.43 |
| SBK3    | 100130827 GuideToPharmac | 249565893 COMPOUND R-16 [PMID: 21967808] |                         |                      |       |
| SCAP    | 22937 PharmGKB           | simvastatin simvastatin                  | SIMVASTATIN             | chembl:CHEMBL1064    | 1.18  |
| SCARB1  | 949 PharmGKB             | peginterferon peginterferon alfa-2a      |                         |                      |       |
| SCD     | 6319 NCI                 | COLCHICIN COLCHICINE                     | COLCHICINE              | chembl:CHEMBL107     | 0.52  |
| SCG5    | 6447 NCI                 | CAPSAICIN CAPSAICIN                      | CAPSAICIN               | chembl:CHEMBL294199  | 7.96  |
| SCGB1A1 | 7356 NCI                 | RHIGF-1 RHIGF-1                          |                         |                      |       |
| SCN10A  | 6336 ChemblInteractio    | blocker CHEMBL12(ARTICAINE HYDROCHLO     | ARTICAINE HYDROCHLORIDE | chembl:CHEMBL1200819 | 0.08  |
| SCN11A  | 11280 ChemblInteractio   | blocker CHEMBL35<NKTR-171                | NKTR-171                | chembl:CHEMBL3545209 | 0.11  |
| SCN1A   | 6323 PharmGKB            | levetiracetam levetiracetam              | LEVETIRACETAM           | chembl:CHEMBL1286    | 0.73  |
| SCN1B   | 6324 TdgClinicalTrial    | ZONISAMIDZONISAMIDE                      | ZONISAMIDE              | chembl:CHEMBL750     | 22.14 |
| SCN2A   | 6326 TdgClinicalTrial    | PROPOFOL PROPOFOL                        | PROPOFOL                | chembl:CHEMBL526     | 0.11  |
| SCN2B   | 6327 TdgClinicalTrial    | ZONISAMIDZONISAMIDE                      | ZONISAMIDE              | chembl:CHEMBL750     | 22.14 |
| SCN3A   | 6328 ChemblInteractio    | blocker CHEMBL12(DRONEDARONE HYDROCD     | DRONEDARONE HYDROCHLOR  | chembl:CHEMBL1201729 | 0.07  |
| SCN3B   | 55800 TdgClinicalTrial   | ZONISAMIDZONISAMIDE                      | ZONISAMIDE              | chembl:CHEMBL750     | 22.14 |
| SCN4A   | 6329 ChemblInteractio    | blocker CHEMBL31<ESLICARBAZEPINE         | ESLICARBAZEPINE         | chembl:CHEMBL315985  | 0.1   |
| SCN4B   | 6330 TdgClinicalTrial    | ZONISAMIDZONISAMIDE                      | ZONISAMIDE              | chembl:CHEMBL750     | 22.14 |
| SCN5A   | 6331 TEND                | FOSPHENY<FOSPHENYTOIN                    | FOSPHENYTOIN            | chembl:CHEMBL1201336 | 2.5   |
| SCN7A   | 6332 ChemblInteractio    | blocker CHEMBL85<PRIMIDONE               | PRIMIDONE               | chembl:CHEMBL856     | 0.04  |
| SCN8A   | 6334 ChemblInteractio    | blocker CHEMBL10<OXCARBAZEPINE           | OXCARBAZEPINE           | chembl:CHEMBL1068    | 0.05  |
| SCN9A   | 6335 TTD                 | DWJ-208 DWJ-208                          |                         |                      |       |
| SCNN1A  | 6337 PharmGKB            | triamterene triamterene                  | TRIAMTERENE             | chembl:CHEMBL585     | 8.84  |
| SCNN1B  | 6338 TdgClinicalTrial    | TRIAMTER<TRIAMTERENE                     | TRIAMTERENE             | chembl:CHEMBL585     | 5.3   |
| SCNN1D  | 6339 TEND                | AMILORIDEAMILORIDE                       | AMILORIDE               | chembl:CHEMBL945     | 15.91 |
| SCNN1G  | 6340 PharmGKB            | amiloride amiloride                      | AMILORIDE               | chembl:CHEMBL945     | 10.23 |
| SCTR    | 6344 GuideToPharmac      | agonist 135651884 SECRETIN               | SECRETIN                | chembl:CHEMBL3039582 | 42.43 |
| SDC1    | 6382 TTD                 | CAR138 T<C<CAR138 T Cells                |                         |                      |       |
| SDC2    | 6383 NCI                 | HEPARAN SHEPARAN SULFATE                 |                         |                      |       |
| SDF4    | 51150 NCI                | ETHANOL ETHANOL                          | ALCOHOL                 | chembl:CHEMBL545     | 1.48  |
| SDHB    | 6390 NCI                 | ANTIBIOTICANTIBIOTIC                     | ANTIBIOTIC              | chembl:CHEMBL606111  | 4.24  |
| SDS     | 10993 NCI                | DEXAMETHDEXAMETHASONE                    | DEXAMETHASONE           | chembl:CHEMBL384467  | 1.52  |
| SELE    | 6401 PharmGKB            | leucovorin leucovorin                    | LEUCOVORIN              | chembl:CHEMBL1679    | 0.57  |
| SELL    | 6402 TdgClinicalTrial    | GMI-1070 GMI-1070                        | RIVIPANSEL              | chembl:CHEMBL3707446 | 28.29 |
| SELP    | 6403 TdgClinicalTrial    | YSPSL YSPSL                              | TORAPSEL                | chembl:CHEMBL2108056 | 9.09  |
| SELPLG  | 6404 TTD                 | RO-4905417 RO-4905417                    | INCLACUMAB              | chembl:CHEMBL2109488 | 15.91 |
| SEM1    | 7979 ChemblInteractio    | inhibitor CHEMBL35<IXAZOMIB CITRATE      | IXAZOMIB CITRATE        | chembl:CHEMBL3545432 | 0.42  |
| SEMA3C  | 10512 PharmGKB           | irinotecan irinotecan                    | IRINOTECAN              | chembl:CHEMBL481     | 2.4   |
| SEMA4D  | 10507 GuideToPharmac     | antibody 310264713 PEPINEMAB             | PEPINEMAB               | chembl:CHEMBL4297884 | 63.65 |
| SENP1   | 29843 DTC                | DNDI141788DNDI1417884                    | CHEMBL1346025           | chembl:CHEMBL1346025 | 7.07  |
| SENP2   | 59343 DTC                | N-ETHYLM<N-ETHYLM<MALEIMIDE              | N-ETHYLM<MALEIMIDE      | chembl:CHEMBL8211    | 25.46 |
| SENP3   | 26168 PharmGKB           | methylphenidmethylphenidate              | METHYLPHENIDATE         | chembl:CHEMBL796     | 2.83  |

|          |                                 |                                                                   |                          |                      |       |
|----------|---------------------------------|-------------------------------------------------------------------|--------------------------|----------------------|-------|
| SENP6    | 26054 DTC                       | GNF-PF-170;GNF-PF-1702                                            | CHEMBL600313             | chembl:CHEMBL600313  | 0.47  |
| SENP7    | 57337 DTC                       | DIHYDROX.DIHYDROXANTHOTHUMOL                                      | DIHYDROXANTHOTHUMOL      | chembl:CHEMBL510279  | 0.57  |
| SENP8    | 123228 DTC                      | DNDI141715DNDI1417156                                             | CHEMBL1504679            | chembl:CHEMBL1504679 | 0.24  |
| SERPINA1 | 5265 TTD                        | Alpha1-prote Alpha1-proteinase inhibitor (human) modified process |                          |                      |       |
| SERPINA3 | 12 PharmGKB                     | antineoplasticantineoplastic agents                               |                          |                      |       |
| SERPINA5 | 5104 PharmGKB                   | gemcitabine gemcitabine                                           | GEMCITABINE              | chembl:CHEMBL888     | 0.39  |
| SERPINA6 | 866 TEND                        | RIMEXOLO;RIMEXOLONE                                               | RIMEXOLONE               | chembl:CHEMBL1200617 | 2.12  |
| SERPINB2 | 5055 TdgClinicalTrial           | UROKINASIUROKINASE                                                | UROKINASE                | chembl:CHEMBL1201420 | 63.65 |
| SERPINB3 | 6317 NCI                        | GONADOTRGONADOTROPINS                                             |                          |                      |       |
| SERPINC1 | 462 TTD                         | UnfractionateUnfractionated heparin                               |                          |                      |       |
| SERPIND1 | 3053 TdgClinicalTrial           | ARDEPARINARDEPARIN                                                |                          |                      |       |
| SERPINE1 | 5054 NCI                        | 9-CIS RETIN9-CIS RETINOIC ACID                                    |                          |                      |       |
| SERPINF1 | 5176 TTD                        | AdPEDR AdPEDR                                                     |                          |                      |       |
| SERPING1 | 710 TTD                         | Rhucin Rhucin                                                     | RHUCIN                   | wikidata:Q29006438   | 15.91 |
| SERPINH1 | 871 NCI                         | ANTISENSEANTISENSE OLIGONUCLEOTIDES                               |                          |                      |       |
| SETBP1   | 26040 JAX-CKB                   | N/A N/A                                                           |                          |                      |       |
| SETD2    | 29072 TTD                       | Cyclic octapeCyclic octapeptide derivative 1                      |                          |                      |       |
| SETD4    | 54093 PharmGKB                  | daunorubicin daunorubicin                                         | DAUNORUBICIN             | chembl:CHEMBL178     | 0.99  |
| SETD7    | 80854 GuideToPharmac inhibitor  | 249565915 (R)-PFI-2                                               |                          |                      |       |
| SF3B1    | 23451 JAX-CKB                   | N/A N/A                                                           |                          |                      |       |
| SF3B2    | 10992 DTC                       | SPLICEOST;SPLICEOSTATIN-A                                         | CHEMBL1221944            | chembl:CHEMBL1221944 | 42.43 |
| SF3B3    | 23450 DTC                       | PLADIENOLPLADIENOLIDE B                                           | PLADIENOLIDE B           | chembl:CHEMBL1242745 | 63.65 |
| SFN      | 2810 DTC                        | IMATINIB IMATINIB                                                 | IMATINIB                 | chembl:CHEMBL941     | 1.99  |
| SFRP5    | 6425 PharmGKB                   | Bisphosphon;Bisphosphonates                                       |                          |                      |       |
| SFTPA1   | 653509 NCI                      | IL-1RA IL-1RA                                                     | ANAKINRA                 | chembl:CHEMBL1201570 | 1.99  |
| SFTPB    | 6439 NCI                        | STZ STZ                                                           | STREPTOZOCIN             | chembl:CHEMBL1651906 | 2.77  |
| SGCA     | 6442 TTD                        | rAAV1.tMChrAAV1.tMCK.human-alpha-sarcoglycan                      |                          |                      |       |
| SGK1     | 6446 CIViC                      | ALPELISIB ALPELISIB                                               | ALPELISIB                | chembl:CHEMBL2396661 | 1.29  |
| SGK2     | 10110 GuideToPharmac inhibitor  | 328083523 COMPOUND 14N [PMID: 25589934]                           |                          |                      |       |
| SGK3     | 23678 GuideToPharmac inhibitor  | 328083523 COMPOUND 14N [PMID: 25589934]                           |                          |                      |       |
| SGMS1    | 259230 GuideToPharmac inhibitor | 252827492 COMPOUND 1J [PMID: 26314925]                            |                          |                      |       |
| SGMS2    | 166929 GuideToPharmac inhibitor | 375973242 SPHINGOMYELIN SYNTHASE 2 INHIBITOR 15W                  |                          |                      |       |
| SGPL1    | 8879 GuideToPharmac inhibitor   | 252166675 COMPOUND 31 [PMID: 24809814]                            |                          |                      |       |
| SGSH     | 6448 TTD                        | HGT-1410 HGT-1410                                                 | N-SULFOGLUCOSAMINE SULFO | chembl:CHEMBL4297976 | 63.65 |
| SGSM3    | 27352 TTD                       | Demecolcine Demecolcine                                           | DEMECOLCINE              | chembl:CHEMBL312862  | 10.61 |
| SH2B1    | 25970 PharmGKB                  | lithium lithium                                                   | LITHIUM                  | chembl:CHEMBL2146126 | 0.31  |
| SH2B3    | 10019 PharmGKB                  | candesartan candesartan                                           | CANDESARTAN              | chembl:CHEMBL1016    | 14.14 |
| SH2D1A   | 4068 PharmGKB                   | emapalumab emapalumab                                             | EMAPALUMAB               | chembl:CHEMBL3989977 | 15.91 |
| SH2D5    | 400745 PharmGKB                 | gemcitabine gemcitabine                                           | GEMCITABINE              | chembl:CHEMBL888     | 1.57  |
| SHBG     | 6462 NCI                        | ENZYME INENZYME INHIBITOR                                         |                          |                      |       |
| SHH      | 6469 NCI                        | RETINOIC ARETINOIC ACID                                           |                          |                      |       |
| SHMT1    | 6470 PharmGKB                   | fluorouracil fluorouracil                                         | FLUOROURACIL             | chembl:CHEMBL185     | 0.24  |

|         |                            |                                                                 |                      |                      |        |
|---------|----------------------------|-----------------------------------------------------------------|----------------------|----------------------|--------|
| SI      | 6476 NCI                   | DEXAMETHDEXAMETHASONE                                           | DEXAMETHASONE        | chembl:CHEMBL384467  | 0.3    |
| SLAH1   | 6477 TdgClinicalTrial      | OMIGAPIL OMIGAPIL                                               | OMIGAPIL             | chembl:CHEMBL1232111 | 31.83  |
| SIGIRR  | 59307 GuideToPharmac       | agonist 178102770 IL-37                                         |                      |                      |        |
| SIGMAR1 | 10280 GuideToPharmac       | antagonist 178103764 FLUVOXAMINE                                | FLUVOXAMINE          | chembl:CHEMBL814     | 0.45   |
| SIK1    | 150094 GuideToPharmac      | inhibitor 249565818 COMPOUND 2C [PMID: 24900538]                |                      |                      |        |
| SIK2    | 23235 GuideToPharmac       | inhibitor 340590212 ARN-3236                                    |                      |                      |        |
| SIK3    | 23387 GuideToPharmac       | inhibitor 178102336 BOSUTINIB                                   | BOSUTINIB            | chembl:CHEMBL288441  | 1.68   |
| SIRT1   | 23411 GuideToPharmac       | inhibitor 249565780 SELISISTAT                                  |                      |                      |        |
| SIRT2   | 22933 TTD                  | ZINC915379 ZINC915379                                           |                      |                      |        |
| SIRT3   | 23410 DTC                  | SURAMIN SURAMIN                                                 | SURAMIN              | chembl:CHEMBL265502  | 1.12   |
| SIRT5   | 23408 DTC                  | GNF-PF-172(GNF-PF-1720                                          | CHEMBL578329         | chembl:CHEMBL578329  | 10.61  |
| SIRT6   | 51548 GuideToPharmac       | inhibitor 252827474 AKK(THIOAC)LM21                             |                      |                      |        |
| SLAMF1  | 6504 NCI                   | METHOTREMETHOTREXATE                                            | METHOTREXATE         | chembl:CHEMBL34259   | 1.18   |
| SLAMF6  | 114836 NCI                 | INTERLEUKINTERLEUKIN-4                                          |                      |                      |        |
| SLAMF7  | 57823 ChemblInteractio     | inhibitor CHEMBL17-ELOTUZUMAB                                   | ELOTUZUMAB           | chembl:CHEMBL1743010 | 318.26 |
| SLC10A1 | 6554 TTD                   | LUM001 LUM001                                                   |                      |                      |        |
| SLC10A2 | 6555 GuideToPharmac        | inhibitor 178103143 264W94                                      |                      |                      |        |
| SLC11A1 | 6556 NCI                   | COBALT COBALT                                                   |                      |                      |        |
| SLC11A2 | 4891 GuideToPharmac        | inhibitor 252827472 COMPOUND 6B [PMID: 22749870]                |                      |                      |        |
| SLC12A1 | 6557 TTD                   | ChlorthalidorChlorthalidone                                     | CHLORTHALIDONE       | chembl:CHEMBL1055    | 3.18   |
| SLC12A2 | 6558 TdgClinicalTrial      | BUMETANIIBUMETANIDE                                             | BUMETANIDE           | chembl:CHEMBL1072    | 12.12  |
| SLC12A3 | 6559 ChemblInteractio      | inhibitor CHEMBL43:HYDROCHLOROTHIAZIDIHYDROCHLOROTHIAZIDE       |                      | chembl:CHEMBL435     | 1.08   |
| SLC12A4 | 6560 GuideToPharmac        | inhibitor 178101310 DIOA                                        |                      |                      |        |
| SLC12A5 | 57468 TdgClinicalTrial     | BUMETANIIBUMETANIDE                                             | BUMETANIDE           | chembl:CHEMBL1072    | 13.64  |
| SLC12A6 | 9990 GuideToPharmac        | inhibitor 178101310 DIOA                                        |                      |                      |        |
| SLC12A7 | 10723 GuideToPharmac       | inhibitor 178101310 DIOA                                        |                      |                      |        |
| SLC12A8 | 84561 PharmGKB             | Tumor necrosTumor necrosis factor alpha (TNF-alpha) inhibitors  |                      |                      |        |
| SLC14A1 | 6563 GuideToPharmac        | inhibitor 252827538 COMPOUND 1A [PMID: 23597791]                |                      |                      |        |
| SLC14A2 | 8170 PharmGKB              | nifedipine nifedipine                                           | NIFEDIPINE           | chembl:CHEMBL193     | 2.4    |
| SLC15A1 | 6564 GuideToPharmac        | inhibitor 178101226 LYS[Z(NO2)]-PRO                             |                      |                      |        |
| SLC15A2 | 6565 GuideToPharmacology   | 178101375 [3H]GLYSAR                                            |                      |                      |        |
| SLC15A3 | 51296 GuideToPharmacology  | 178101341 [14C]HISTIDINE                                        |                      |                      |        |
| SLC15A4 | 121260 GuideToPharmacology | 178101385 [3H]HISTIDINE                                         |                      |                      |        |
| SLC16A1 | 6566 NCI                   | BUTYRATE BUTYRATE                                               |                      |                      |        |
| SLC16A3 | 9123 NCI                   | STZ STZ                                                         | STREPTOZOCIN         | chembl:CHEMBL1651906 | 2.77   |
| SLC16A5 | 9121 PharmGKB              | cisplatin cisplatin                                             | CISPLATIN            | chembl:CHEMBL11359   | 0.88   |
| SLC16A7 | 9194 GuideToPharmac        | inhibitor 404859052 AZD3965                                     |                      |                      |        |
| SLC17A9 | 63910 GuideToPharmac       | inhibitor 340590235 CLODRONIC ACID                              |                      |                      |        |
| SLC18A1 | 6570 GuideToPharmac        | inhibitor 178101536 TETRABENAZINE                               | TETRABENAZINE        | chembl:CHEMBL117785  | 3.98   |
| SLC18A2 | 6571 ChemblInteractio      | inhibitor CHEMBL12(LISDEXAMFETAMINE DIMLISDEXAMFETAMINE DIMESYL | chembl:CHEMBL1201178 |                      | 1.59   |
| SLC18A3 | 6572 GuideToPharmac        | inhibitor 178101477 AMINOBENZOVESAMICOL                         |                      |                      |        |
| SLC19A1 | 6573 TTD                   | Folic Acid Folic Acid                                           |                      |                      |        |

|          |                                 |                                           |                           |                  |                      |       |
|----------|---------------------------------|-------------------------------------------|---------------------------|------------------|----------------------|-------|
| SLC19A2  | 10560 GuideToPharmacology       | 178101346 [3H]THIAMINE                    |                           |                  |                      |       |
| SLC19A3  | 80704 GuideToPharmacology       | 178101346 [3H]THIAMINE                    |                           |                  |                      |       |
| SLC1A1   | 6505 NCI                        | CLOZAPINE                                 | CLOZAPINE                 | CLOZAPINE        | chembl:CHEMBL42      | 0.3   |
| SLC1A2   | 6506 GuideToPharmac inhibitor   | 178101134 SYM2081                         |                           |                  |                      |       |
| SLC1A3   | 6507 GuideToPharmacology        | 178101410 [3H]D-ASPARTIC ACID             |                           |                  |                      |       |
| SLC1A5   | 6510 GuideToPharmac inhibitor   | 178101229 BENZYL CYSTEINE                 | BENZYL CYSTEINE           |                  | chembl:CHEMBL63130   | 31.83 |
| SLC1A6   | 6511 GuideToPharmac inhibitor   | 178101294 THREO-3-METHYLGLUTAMATE         |                           |                  |                      |       |
| SLC1A7   | 6512 GuideToPharmacology        | 178101255 [3H]L-ASPARTIC ACID             |                           |                  |                      |       |
| SLC22A1  | 6580 DTC                        | TETRYLAM                                  | TETRYLAMMONIUM            | TETRYLAMMONIUM   | chembl:CHEMBL9324    | 8.49  |
| SLC22A11 | 55867 GuideToPharmac inhibitor  | 252827456 CEPHALOTHIN                     | CEPHALOTHIN               |                  | chembl:CHEMBL617     | 1.59  |
| SLC22A12 | 116085 TTD                      | Sulfonamide                               | Sulfonamide derivative 11 |                  |                      |       |
| SLC22A16 | 85413 PharmGKB                  | cyclophosphacyclophosphamide              |                           | CYCLOPHOSPHAMIDE | chembl:CHEMBL88      | 0.81  |
| SLC22A2  | 6582 DTC                        | CIMETIDINE                                | CIMETIDINE                |                  | chembl:CHEMBL30      | 1.63  |
| SLC22A3  | 6581 PharmGKB                   | catecholamin                              | catecholamines            |                  |                      |       |
| SLC22A4  | 6583 PharmGKB                   | imatinib                                  | imatinib                  | IMATINIB         | chembl:CHEMBL941     | 2.98  |
| SLC22A5  | 6584 TdgClinicalTrial           | PROPIONYL                                 | PROPIONYL-L-CARNITINE     |                  |                      |       |
| SLC22A6  | 9356 PharmGKB                   | hmg coa reductase inhibitors              |                           |                  |                      |       |
| SLC22A7  | 10864 PharmGKB                  | capecitabine                              | capecitabine              | CAPECITABINE     | chembl:CHEMBL1773    | 1.18  |
| SLC22A8  | 9376 TTD                        | Bupropion+z                               | Bupropion+zonisamide      |                  |                      |       |
| SLC22A9  | 114571 PharmGKB                 | methotrexate                              | methotrexate              | METHOTREXATE     | chembl:CHEMBL34259   | 1.18  |
| SLC23A1  | 9963 TTD                        | Vitamin C                                 | Vitamin C                 |                  |                      |       |
| SLC23A2  | 9962 TTD                        | Vitamin C                                 | Vitamin C                 |                  |                      |       |
| SLC25A1  | 6576 GuideToPharmac inhibitor   | 178101413 1,2,3-BENZENETRICARBOXYLIC ACID |                           |                  |                      |       |
| SLC25A20 | 788 TdgClinicalTrial            | PROPIONYL                                 | PROPIONYL-L-CARNITINE     |                  |                      |       |
| SLC25A29 | 123096 TdgClinicalTrial         | PROPIONYL                                 | PROPIONYL-L-CARNITINE     |                  |                      |       |
| SLC25A31 | 83447 PharmGKB                  | metoprolol                                | metoprolol                | METOPROLOL       | chembl:CHEMBL13      | 2.65  |
| SLC25A4  | 291 TTD                         | Clodronate                                | Clodronate                | CLODRONIC ACID   | chembl:CHEMBL12318   | 25.46 |
| SLC25A5  | 292 TdgClinicalTrial            | CLODRONACLODRONATE                        |                           | CLODRONIC ACID   | chembl:CHEMBL12318   | 12.73 |
| SLC25A6  | 293 TdgClinicalTrial            | CLODRONACLODRONATE                        |                           | CLODRONIC ACID   | chembl:CHEMBL12318   | 12.73 |
| SLC26A8  | 116369 PharmGKB                 | adefovir dipiv                            | adefovir dipivoxil        |                  |                      |       |
| SLC26A9  | 115019 PharmGKB                 | ivacaftor                                 | ivacaftor                 | IVACAFTOR        | chembl:CHEMBL2010601 | 31.83 |
| SLC27A1  | 376497 GuideToPharmac inhibitor | 252827459 COMPOUND 5K [PMID: 23528296]    |                           |                  |                      |       |
| SLC27A4  | 10999 GuideToPharmac inhibitor  | 252827468 COMPOUND 1L [PMID: 16644217]    |                           |                  |                      |       |
| SLC28A1  | 9154 PharmGKB                   | gemcitabine                               | gemcitabine               | GEMCITABINE      | chembl:CHEMBL888     | 0.63  |
| SLC28A2  | 9153 DTC                        | ADENOSINE                                 | ADENOSINE                 | ADENOSINE        | chembl:CHEMBL477     | 1.93  |
| SLC28A3  | 64078 DTC                       | URIDINE                                   | URIDINE                   | URIDINE          | chembl:CHEMBL100259  | 2.65  |
| SLC29A1  | 2030 PharmGKB                   | gemcitabine                               | gemcitabine               | GEMCITABINE      | chembl:CHEMBL888     | 0.34  |
| SLC29A2  | 3177 PharmGKB                   | gemcitabine                               | gemcitabine               | GEMCITABINE      | chembl:CHEMBL888     | 0.52  |
| SLC29A3  | 55315 PharmGKB                  | gemcitabine                               | gemcitabine               | GEMCITABINE      | chembl:CHEMBL888     | 0.79  |
| SLC29A4  | 222962 GuideToPharmac inhibitor | 135652709 QUININE                         | QUININE                   | QUININE          | chembl:CHEMBL170     | 0.64  |
| SLC2A1   | 6513 NCI                        | TCDD                                      | TCDD                      |                  |                      |       |
| SLC2A2   | 6514 GuideToPharmacology        | 178101360 [3H]2-DEOXYGLUCOSE              |                           |                  |                      |       |

|          |                                 |                                                      |                 |                      |       |
|----------|---------------------------------|------------------------------------------------------|-----------------|----------------------|-------|
| SLC2A3   | 6515 DTC                        | RESVERATRESVERATROL                                  | RESVERATROL     | chembl:CHEMBL165     | 0.88  |
| SLC2A4   | 6517 NCI                        | HYDROGENHYDROGEN PEROXIDE                            |                 |                      |       |
| SLC2A5   | 6518 NCI                        | STREPTOZCSTREPTOZOTOCIN                              | STREPTOZOCIN    | chembl:CHEMBL1651906 | 1.38  |
| SLC30A8  | 169026 PharmGKB                 | repaglinide repaglinide                              | REPAGLINIDE     | chembl:CHEMBL1272    | 8.49  |
| SLC30A9  | 10463 PharmGKB                  | aspirin aspirin                                      | ASPIRIN         | chembl:CHEMBL25      | 0.87  |
| SLC31A1  | 1317 PharmGKB                   | cisplatin cisplatin                                  | CISPLATIN       | chembl:CHEMBL11359   | 0.66  |
| SLC32A1  | 140679 GuideToPharmac inhibitor | 178101523 VIGABATRIN                                 | VIGABATRIN      | chembl:CHEMBL89598   | 21.22 |
| SLC33A1  | 9197 GuideToPharmacology        | 178101262 [14C]ACETYLCOA                             |                 |                      |       |
| SLC34A2  | 10568 GuideToPharmac antibody   | 252166615 LIFASTUZUMAB VEDOTIN                       |                 |                      |       |
| SLC36A1  | 206358 GuideToPharmac inhibitor | 135651515 L-TRYPTOPHAN                               | TRYPTOPHAN      | chembl:CHEMBL54976   | 2.65  |
| SLC36A2  | 153201 GuideToPharmac inhibitor | 178101406 A-METHYL-D,L-TRYPTOPHAN                    |                 |                      |       |
| SLC38A1  | 81539 GuideToPharmacology       | 178101263 [14C]ALANINE                               |                 |                      |       |
| SLC38A2  | 54407 GuideToPharmacology       | 178101264 [3H]ALANINE                                |                 |                      |       |
| SLC38A3  | 10991 GuideToPharmacology       | 178101351 [14C]GLUTAMINE                             |                 |                      |       |
| SLC38A4  | 55089 GuideToPharmacology       | 178101263 [14C]ALANINE                               |                 |                      |       |
| SLC38A5  | 92745 GuideToPharmacology       | 178101385 [3H]HISTIDINE                              |                 |                      |       |
| SLC39A14 | 23516 PharmGKB                  | nortriptyline nortriptyline                          | NORTRIPTYLINE   | chembl:CHEMBL445     | 10.61 |
| SLC39A6  | 25800 TTD                       | SGN LIV1A SGN LIV1A                                  |                 |                      |       |
| SLC39A8  | 64116 PharmGKB                  | ethanol ethanol                                      | ALCOHOL         | chembl:CHEMBL545     | 1.48  |
| SLC3A2   | 6520 TTD                        | IGN523 IGN523                                        |                 |                      |       |
| SLC40A1  | 30061 TTD                       | Ferroportin rFerroportin mab                         |                 |                      |       |
| SLC44A1  | 23446 GuideToPharmac inhibitor  | 178101222 HEMICHOLINIUM-3                            | HEMICHOLINIUM-3 | chembl:CHEMBL268697  | 15.91 |
| SLC44A4  | 80736 TTD                       | ASG-5ME ASG-5ME                                      | ASG-5ME         | chembl:CHEMBL2109574 | 63.65 |
| SLC46A1  | 113235 GuideToPharmacology      | 178103302 [3H]FOLINIC ACID                           |                 |                      |       |
| SLC47A1  | 55244 PharmGKB                  | metformin metformin                                  | METFORMIN       | chembl:CHEMBL1431    | 3.77  |
| SLC47A2  | 146802 GuideToPharmacology      | 178101296 [14C]TEA                                   |                 |                      |       |
| SLC4A1   | 6521 PharmGKB                   | metoprolol metoprolol                                | METOPROLOL      | chembl:CHEMBL13      | 3.98  |
| SLC4A8   | 9498 PharmGKB                   | ethanol ethanol                                      | ALCOHOL         | chembl:CHEMBL545     | 1.48  |
| SLC5A1   | 6523 TTD                        | LIK-066 LIK-066                                      | LICOGLIFLOZIN   | chembl:CHEMBL4297625 | 3.26  |
| SLC5A11  | 115584 GuideToPharmac inhibitor | 178101467 PHLORIZIN                                  | PHLORIZIN       | chembl:CHEMBL245067  | 31.83 |
| SLC5A2   | 6524 TdgClinicalTrial           | BI-10773 BI-10773                                    | EMPAGLIFLOZIN   | chembl:CHEMBL2107830 | 5.66  |
| SLC5A3   | 6526 GuideToPharmac inhibitor   | 178101467 PHLORIZIN                                  | PHLORIZIN       | chembl:CHEMBL245067  | 31.83 |
| SLC5A4   | 6527 TTD                        | DapagliflozinDapagliflozin                           | DAPAGLIFLOZIN   | chembl:CHEMBL429910  | 2.36  |
| SLC5A5   | 6528 TTD                        | Ad5CMV-NIAd5CMV-NIS                                  |                 |                      |       |
| SLC5A6   | 8884 TTD                        | Gabapentin eGabapentin enacarbil                     |                 |                      |       |
| SLC5A7   | 60482 DTC                       | (S)-ONDANSE(S)-ONDANSETRON                           | (S)-ONDANSETRON | chembl:CHEMBL399705  | 1.1   |
| SLC5A8   | 160728 GuideToPharmac inhibitor | 135650365 IBUPROFEN                                  | IBUPROFEN       | chembl:CHEMBL521     | 0.62  |
| SLC6A1   | 6529 ChemblInteractio inhibitor | CHEMBL166TIAGABINE HYDROCHLO TIAGABINE HYDROCHLORIDE |                 | chembl:CHEMBL1695    | 12.73 |
| SLC6A11  | 6538 TTD                        | GSK683699 GSK683699                                  |                 |                      |       |
| SLC6A12  | 6539 GuideToPharmac inhibitor   | 178103126 (R)-EF-1520                                |                 |                      |       |
| SLC6A14  | 11254 GuideToPharmac inhibitor  | 178101406 A-METHYL-D,L-TRYPTOPHAN                    |                 |                      |       |
| SLC6A15  | 55117 GuideToPharmac inhibitor  | 178103791 LORATADINE                                 | LORATADINE      | chembl:CHEMBL998     | 11.93 |

|         |                            |            |                                          |                     |                      |       |
|---------|----------------------------|------------|------------------------------------------|---------------------|----------------------|-------|
| SLC6A19 | 340024 GuideToPharmac      | inhibitor  | 223365936 BENZATROPINE                   | BENZATROPINE        | wikidata:Q415026     | 31.83 |
| SLC6A2  | 6530 TEND                  |            | MAPROTILIMAPROTILINE                     | MAPROTILINE         | chembl:CHEMBL21731   | 0.87  |
| SLC6A3  | 6531 GuideToPharmac        | inhibitor  | 178103890 TRIMIPRAMINE                   | TRIMIPRAMINE        | chembl:CHEMBL644     | 0.27  |
| SLC6A4  | 6532 TdgClinicalTrial      |            | DULOXETINDULOXETINE                      | DULOXETINE          | chembl:CHEMBL1175    | 0.92  |
| SLC6A5  | 9152 GuideToPharmac        | inhibitor  | 178101476 ALX 1405                       |                     |                      |       |
| SLC6A7  | 6534 GuideToPharmac        | inhibitor  | 178101297 LP-403812                      |                     |                      |       |
| SLC6A9  | 6536 TTD                   |            | GlyT1 PET r;GlyT1 PET radiotracers       |                     |                      |       |
| SLC7A11 | 23657 TdgClinicalTrial     |            | RILUZOLE RILUZOLE                        | RILUZOLE            | chembl:CHEMBL744     | 8.3   |
| SLC7A5  | 8140 GuideToPharmac        | inhibitor  | 328083449 KYT-0353                       |                     |                      |       |
| SLC8A3  | 6547 GuideToPharmac        | inhibitor  | 329968424 YM-244769                      |                     |                      |       |
| SLC9A1  | 6548 DTC                   |            | CARIPORID CARIPORIDE                     | CARIPORIDE          | chembl:CHEMBL436559  | 63.65 |
| SLC9A3  | 6550 NCI                   |            | GLUCOCORGLUCOCORTICOID                   |                     |                      |       |
| SLC9A5  | 6553 GuideToPharmac        | inhibitor  | 135649936 AMILORIDE                      | AMILORIDE           | chembl:CHEMBL945     | 4.55  |
| SLCO1A2 | 6579 NCI                   |            | TESTOSTERTESTOSTERONE                    | TESTOSTERONE        | chembl:CHEMBL386630  | 0.51  |
| SLCO1B1 | 10599 FDA                  |            | Rosuvastatin Rosuvastatin                | ROSUVASTATIN        | chembl:CHEMBL1496    | 0.09  |
| SLCO1B3 | 28234 PharmGKB             |            | hmg coa reduhmg coa reductase inhibitors |                     |                      |       |
| SLCO1C1 | 53919 GuideToPharmac       | inhibitor  | 178101174 PROBENECID                     | PROBENECID          | chembl:CHEMBL897     | 1.99  |
| SLCO2A1 | 6578 PharmGKB              |            | Thiazides, pl;Thiazides, plain           |                     |                      |       |
| SLCO2B1 | 11309 GuideToPharmac       | inhibitor  | 178101619 ERLOTINIB                      | ERLOTINIB           | chembl:CHEMBL553     | 0.06  |
| SLCO3A1 | 28232 GuideToPharmacology  |            | 178101458 [3H]ESTRONE-3-SULPHATE         |                     |                      |       |
| SLCO4A1 | 28231 GuideToPharmacology  |            | 178101458 [3H]ESTRONE-3-SULPHATE         |                     |                      |       |
| SLCO4C1 | 353189 GuideToPharmacology |            | 178101436 [3H]DIGOXIN                    |                     |                      |       |
| SLFN11  | 91607 CIViC                |            | TALAZOPAITALAZOPARIB                     | TALAZOPARIB         | chembl:CHEMBL3137320 | 3.86  |
| SLIT1   | 6585 PharmGKB              |            | hydrochlorotlhydrochlorothiazide         | HYDROCHLOROTHIAZIDE | chembl:CHEMBL435     | 0.88  |
| SLITRK6 | 84189 TTD                  |            | ASG-15ME ASG-15ME                        |                     |                      |       |
| SLK     | 9748 DTC                   |            | ALISERTIB ALISERTIB                      | ALISERTIB           | chembl:CHEMBL483158  | 0.05  |
| SLPI    | 6590 NCI                   |            | HEPARIN HEPARIN                          | HEPARIN             | chembl:CHEMBL1909300 | 6.58  |
| SMAD2   | 4087 DTC                   |            | GERANIIN GERANIIN                        | GERANIIN            | chembl:CHEMBL506069  | 14.14 |
| SMAD3   | 4088 DTC                   |            | GNF-PF-129;GNF-PF-1295                   | CHEMBL579837        | chembl:CHEMBL579837  | 0.05  |
| SMAD4   | 4089 JAX-CKB               |            | Sapanisertib Sapanisertib                | SAPANISERTIB        | chembl:CHEMBL3545097 | 0.46  |
| SMAD7   | 4092 TTD                   |            | GED-0301 GED-0301                        | MONGERSEN SODIUM    | chembl:CHEMBL3707383 | 31.83 |
| SMARCA2 | 6595 DTC                   |            | GNF-PF-373(GNF-PF-3736                   | CHEMBL583824        | chembl:CHEMBL583824  | 5.3   |
| SMARCA4 | 6597 GuideToPharmac        | inhibitor  | 249565598 PFI-3                          |                     |                      |       |
| SMARCB1 | 6598 JAX-CKB               |            | radiotherapy radiotherapy                |                     |                      |       |
| SMG1    | 23049 TTD                  |            | ApoC-III ApoC-III                        |                     |                      |       |
| SMN1    | 6606 DTC                   |            | GNF-PF-350 GNF-PF-3501                   | CHEMBL581910        | chembl:CHEMBL581910  | 0.08  |
| SMN2    | 6607 DTC                   |            | APIGENIN APIGENIN                        | APIGENIN            | chembl:CHEMBL28      | 0.02  |
| SMO     | 6608 GuideToPharmac        | antagonist | 178103554 VISMODEGIB                     | VISMODEGIB          | chembl:CHEMBL473417  | 29.38 |
| SMOX    | 54498 NCI                  |            | DFMO DFMO                                |                     |                      |       |
| SMPD1   | 6609 GuideToPharmac        | inhibitor  | 404859087 COMPOUND 21B [PMID: 31944697]  |                     |                      |       |
| SMS     | 6611 TTD                   |            | 2-hydroxyole 2-hydroxyoleic acid         |                     |                      |       |
| SMTN    | 6525 NCI                   |            | TRANSFORITRANSFORMING GROWTH FACTOR      |                     |                      |       |

|                 |                              |            |                                       |                  |                      |       |
|-----------------|------------------------------|------------|---------------------------------------|------------------|----------------------|-------|
| SMYD2           | 56950 GuideToPharmac         | inhibitor  | 178103600 AZ505                       |                  |                      |       |
| SNAP25          | 6616 TdgClinicalTrial        |            | BOTULINUMBOTULINUM TOXIN TYPE A       |                  |                      |       |
| SNCA            | 6622 DTC                     |            | ALTENUSINALTENUSIN                    | ALTENUSIN        | chembl:CHEMBL483531  | 0.21  |
| SNORD68         | 606500 PharmGKB              |            | docetaxel docetaxel                   | DOCETAXEL        | chembl:CHEMBL92      | 0.81  |
| SNW1            | 22938 NCI                    |            | TRANSFORITRANSFORMING GROWTH FACTOR   |                  |                      |       |
| SOAT1           | 6646 NCI                     |            | NIFEDIPINE NIFEDIPINE                 | NIFEDIPINE       | chembl:CHEMBL193     | 0.72  |
| SOCS1           | 8651 NCI                     |            | INSULIN INSULIN                       | INSULIN          | chembl:CHEMBL1201631 | 1.25  |
| SOCS3           | 9021 NCI                     |            | ANTISENSE ANTISENSE OLIGONUCLEOTIDES  |                  |                      |       |
| SOCS6           | 9306 NCI                     |            | INSULIN INSULIN                       | INSULIN          | chembl:CHEMBL1201631 | 2.5   |
| SOD1            | 6647 DTC                     |            | OXYTETRA OXYTETRACYCLINE              | OXYTETRACYCLINE  | chembl:CHEMBL1517    | 0.88  |
| SOD2            | 6648 PharmGKB                |            | cyclophosphacyclophosphamide          | CYCLOPHOSPHAMIDE | chembl:CHEMBL88      | 0.16  |
| SORCS2          | 57537 PharmGKB               |            | atazanavir atazanavir                 | ATAZANAVIR       | chembl:CHEMBL1163    | 14.14 |
| SOS1            | 6654 GuideToPharmacology     |            | 385612239 BAY-293                     |                  |                      |       |
| SOST            | 50964 TTD                    |            | LY2541546 LY2541546                   |                  |                      |       |
| SOX10           | 6663 PharmGKB                |            | paclitaxel paclitaxel                 | PACLITAXEL       | chembl:CHEMBL428647  | 0.33  |
| SP1             | 6667 TTD                     |            | Terameproco Terameprocol              | TERAMEPROCOL     | chembl:CHEMBL90983   | 31.83 |
| SP3             | 6670 NCI                     |            | DOXORUBIN DOXORUBICIN                 | DOXORUBICIN      | chembl:CHEMBL53463   | 1.35  |
| SP7             | 121340 NCI                   |            | ASCORBIC ASCORBIC ACID                |                  |                      |       |
| SPARC           | 6678 ClarityFoundationBiomar |            | NAB-PACLINAB-PACLITAXEL               |                  |                      |       |
| SPATA5          | 166378 PharmGKB              |            | paclitaxel paclitaxel                 | PACLITAXEL       | chembl:CHEMBL428647  | 1.31  |
| SPECC1L         | 23384 PharmGKB               |            | methotrexate methotrexate             | METHOTREXATE     | chembl:CHEMBL34259   | 1.18  |
| SPECC1L-ADORA2A | 101730217 DTC                |            | CGS-21680 CGS-21680                   | CGS-21680        | chembl:CHEMBL331372  | 42.43 |
| SPG7            | 6687 PharmGKB                |            | docetaxel docetaxel                   | DOCETAXEL        | chembl:CHEMBL92      | 0.81  |
| SPHK1           | 8877 TTD                     |            | PMID275396 PMID27539678-Compound-11   |                  |                      |       |
| SPHK2           | 56848 GuideToPharmac         | inhibitor  | 404859088 SLM6071469                  |                  |                      |       |
| SPINT1          | 6692 NCI                     |            | SURAMIN SURAMIN                       | SURAMIN          | chembl:CHEMBL265502  | 3.35  |
| SPOPL           | 339745 PharmGKB              |            | olanzapine olanzapine                 | OLANZAPINE       | chembl:CHEMBL715     | 0.94  |
| SPP1            | 6696 NCI                     |            | SODIUM BUSODIUM BUTYRATE              |                  |                      |       |
| SPR             | 6697 ChemblInteractio        | antagonist | CHEMBL147 APREPITANT                  | APREPITANT       | chembl:CHEMBL1471    | 1.52  |
| SPSB2           | 84727 DTC                    |            | PHENYLTHIAPHENYLTHIAZOL-2-AMIN        | CHEMBL175296     | chembl:CHEMBL175296  | 63.65 |
| SPTBN1          | 6711 TTD                     |            | ABT-413 ABT-413                       |                  |                      |       |
| SPTLC2          | 9517 GuideToPharmac          | inhibitor  | 178103276 MYRIOCIN                    | MYRIOCIN         | chembl:CHEMBL55076   | 31.83 |
| SPTLC3          | 55304 GuideToPharmac         | inhibitor  | 178103276 MYRIOCIN                    | MYRIOCIN         | chembl:CHEMBL55076   | 31.83 |
| SQLE            | 6713 GuideToPharmac          | inhibitor  | 252827452 COMPOUND 1B [PMID: 9871762] |                  |                      |       |
| SQSTM1          | 8878 TTD                     |            | IMX-942 IMX-942                       | DUSQUETIDE       | chembl:CHEMBL3545314 | 63.65 |
| SRC             | 6714 DTC                     |            | CEDIRANIB CEDIRANIB                   | CEDIRANIB        | chembl:CHEMBL491473  | 0.07  |
| SRD5A1          | 6715 TdgClinicalTrial        |            | LEVONORGLEVONORGESTREL                | LEVONORGESTREL   | chembl:CHEMBL1389    | 16.97 |
| SRD5A2          | 6716 TTD                     |            | Finasteride Finasteride               | FINASTERIDE      | chembl:CHEMBL710     | 26.93 |
| SRD5A3          | 79644 ChemblInteractio       | inhibitor  | CHEMBL12(DUTASTERIDE                  | DUTASTERIDE      | chembl:CHEMBL1200969 | 15.91 |
| SREBF1          | 6720 PharmGKB                |            | fluvastatin fluvastatin               | FLUVASTATIN      | chembl:CHEMBL2220442 | 1.52  |
| SRGN            | 5552 NCI                     |            | HEPARIN HEPARIN                       | HEPARIN          | chembl:CHEMBL1909300 | 4.39  |
| SRI             | 6717 NCI                     |            | ADM ADM                               |                  |                      |       |

|         |                       |                            |                              |                       |                      |       |
|---------|-----------------------|----------------------------|------------------------------|-----------------------|----------------------|-------|
| SRMS    | 6725 DTC              | OSI-632                    | OSI-632                      | OSI-632               | chembl:CHEMBL253969  | 0.19  |
| SRP19   | 6728 PharmGKB         | paroxetine                 | paroxetine                   | PAROXETINE            | chembl:CHEMBL490     | 1.27  |
| SRPK1   | 6732 DTC              | TAE-684                    | TAE-684                      | TAE-684               | chembl:CHEMBL509032  | 0.05  |
| SRPK2   | 6733 GuideToPharmac   | 249565786                  | URMC-099                     |                       |                      |       |
| SRPK3   | 26576 GuideToPharmac  | 249565802                  | COMPOUND 25 [PMID: 17935989] |                       |                      |       |
| SRPRB   | 58477 PharmGKB        | ethanol                    | ethanol                      | ALCOHOL               | chembl:CHEMBL545     | 1.48  |
| SRSF10  | 10772 TTD             | Cynarin                    | Cynarin                      | CYNARIN               | chembl:CHEMBL487258  | 63.65 |
| SRSF2   | 6427 OncoKB           | H3B-8800                   | H3B-8800                     |                       |                      |       |
| SRY     | 6736 NCI              | HORMONES                   | HORMONES                     |                       |                      |       |
| SSRP1   | 6749 TTD              | CBL0102                    | CBL0102                      |                       |                      |       |
| SST     | 6750 NCI              | ESTRADIOLESTRADIOL         | BENZOATE                     |                       |                      |       |
| SSTR1   | 6751 GuideToPharmac   | 135652502                  | [125I]CGP 23996              |                       |                      |       |
| SSTR2   | 6752 ChemblInteractio | CHEMBL21(VAPREOTIDE        |                              | VAPREOTIDE            | chembl:CHEMBL2103975 | 3.74  |
| SSTR3   | 6753 GuideToPharmac   | 135652571                  | [125I]TYR7-SST3-ODN-8        |                       |                      |       |
| SSTR4   | 6754 GuideToPharmac   | 135652578                  | [125I]TYR11-SRIF-14          |                       |                      |       |
| SSTR5   | 6755 GuideToPharmac   | 135652247                  | L-362,855                    |                       |                      |       |
| ST13    | 6767 PharmGKB         | corticosteroid             | corticosteroids              |                       |                      |       |
| ST14    | 6768 TTD              | US8569313,                 | US8569313, Inhibitor 14      |                       |                      |       |
| ST6GAL1 | 6480 PharmGKB         | flucloxacillin             | flucloxacillin               | FLOXACILLIN           | chembl:CHEMBL222645  | 18.19 |
| STAB2   | 55576 NCI             | ALBUMIN                    | ALBUMIN                      | ALBUMIN HUMAN         | chembl:CHEMBL1201451 | 8.49  |
| STAG2   | 10735 JAX-CKB         | Trametinib                 | Trametinib                   | TRAMETINIB            | chembl:CHEMBL2103875 | 0.38  |
| STAG3   | 10734 CIViC           | VEMURAFEVEMURAFENIB        |                              | VEMURAFENIB           | chembl:CHEMBL1229517 | 4.24  |
| STAR    | 6770 NCI              | BDNF                       | BDNF                         |                       |                      |       |
| STAT1   | 6772 TdgClinicalTrial | AVT-02 UE                  | AVT-02 UE                    |                       |                      |       |
| STAT2   | 6773 NCI              | 13-CIS-RETI13-CIS-RETINOIC | ACID                         |                       |                      |       |
| STAT3   | 6774 DTC              | NICLOSAMIN                 | NICLOSAMIDE                  | NICLOSAMIDE           | chembl:CHEMBL1448    | 0.1   |
| STAT4   | 6775 NCI              | IL-2                       | IL-2                         | ALDESLEUKIN           | wikidata:Q20801763   | 2.45  |
| STAT5A  | 6776 DTC              | TOFACITIN                  | TOFACITINIB                  | TOFACITINIB           | chembl:CHEMBL221959  | 10.61 |
| STAT5B  | 6777 TEND             | DASATINIB                  | DASATINIB                    | DASATINIB             | chembl:CHEMBL1421    | 1.18  |
| STAT6   | 6778 DTC              | NSC-607097                 | NSC-607097                   | CHEMBL1374370         | chembl:CHEMBL1374370 | 5.3   |
| STEAP1  | 26872 TTD             | RG7450                     | RG7450                       | VANDORTUZUMAB VEDOTIN | chembl:CHEMBL3833306 | 127.3 |
| STIM2   | 57620 NCI             | AMINOGLY                   | AMINOGLYCOSIDE               | ANTIBIOTIC            |                      |       |
| STING1  | 340061 GuideToPharmac | 381118902                  | ADU-S100                     | ADU-S100              | chembl:CHEMBL4297688 | 127.3 |
| STK10   | 6793 GuideToPharmac   | 381118815                  | DDR1/2 INHIBITOR 5N          |                       |                      |       |
| STK11   | 6794 DoCM             | EVEROLIM                   | EVEROLIMUS                   | EVEROLIMUS            | chembl:CHEMBL1908360 | 0.28  |
| STK16   | 8576 GuideToPharmac   | 249565890                  | COMPOUND 27 [PMID: 21123062] |                       |                      |       |
| STK17A  | 9263 DTC              | AZD-1080                   | AZD-1080                     | AZD-1080              | chembl:CHEMBL1969664 | 0.2   |
| STK24   | 8428 GuideToPharmac   | 178102336                  | BOSUTINIB                    | BOSUTINIB             | chembl:CHEMBL288441  | 3.35  |
| STK3    | 6788 DTC              | SOTRASTA                   | SOTRASTAUIN                  | SOTRASTAUIN           | chembl:CHEMBL565612  | 0.04  |
| STK31   | 56164 GuideToPharmac  | 249565802                  | COMPOUND 25 [PMID: 17935989] |                       |                      |       |
| STK32B  | 55351 GuideToPharmac  | 249565899                  | COMPOUND 74 [PMID: 24793884] |                       |                      |       |
| STK33   | 65975 GuideToPharmac  | 249565870                  | COMPOUND 1 [PMID: 21742770]  |                       |                      |       |

|         |                      |                |                     |                                 |                      |       |
|---------|----------------------|----------------|---------------------|---------------------------------|----------------------|-------|
| STK36   | 27148 DTC            | SB-202190      | SB-202190           | SB-202190                       | chembl:CHEMBL278041  | 1.82  |
| STK38   | 11329 GuideToPharmac | inhibitor      | 249565889           | COMPOUND 35 [PMID: 20684608]    |                      |       |
| STK38L  | 23012 GuideToPharmac | inhibitor      | 249565890           | COMPOUND 27 [PMID: 21123062]    |                      |       |
| STK39   | 27347 PharmGKB       | losartan       | losartan            | LOSARTAN                        | chembl:CHEMBL191     | 14.14 |
| STK4    | 6789 GuideToPharmac  | inhibitor      | 252827426           | COMPOUND 38 [PMID: 20817473]    |                      |       |
| STMN1   | 3925 CIViC           | PACLITAXE      | PACLITAXEL          | PACLITAXEL                      | chembl:CHEMBL428647  | 1.31  |
| STN1    | 79991 PharmGKB       | atenolol       | atenolol            | ATENOLOL                        | chembl:CHEMBL24      | 3.74  |
| STRAP   | 11171 NCI            | ADJUVANT       | ADJUVANT            |                                 |                      |       |
| STS     | 412 TTD              | STX-140        | STX-140             |                                 |                      |       |
| STX11   | 8676 PharmGKB        | emapalumab     | emapalumab          | EMAPALUMAB                      | chembl:CHEMBL3989977 | 15.91 |
| STX1B   | 112755 PharmGKB      | warfarin       | warfarin            | WARFARIN                        | chembl:CHEMBL1464    | 3.54  |
| STX4    | 6810 PharmGKB        | phenprocoum    | phenprocoumon       | PHENPROCOUMON                   | chembl:CHEMBL1465    | 9.09  |
| STXBP2  | 6813 PharmGKB        | emapalumab     | emapalumab          | EMAPALUMAB                      | chembl:CHEMBL3989977 | 15.91 |
| SUCNR1  | 56670 GuideToPharmac | agonist        | 340590261           | CIS-EPOXYSUCCINIC ACID          |                      |       |
| SUFU    | 51684 CIViC          | SONIDEGIB      | SONIDEGIB           | SONIDEGIB                       | chembl:CHEMBL2105737 | 25.46 |
| SUGCT   | 79783 PharmGKB       | hormonal       | conhormonal         | contraceptives for systemic use |                      |       |
| SULT1A1 | 6817 PharmGKB        | acetaminophe   | acetaminophen       | ACETAMINOPHEN                   | chembl:CHEMBL112     | 2.04  |
| SULT1A2 | 6799 NCI             | STREPTOZC      | STREPTOZOCIN        | STREPTOZOCIN                    | chembl:CHEMBL1651906 | 2.77  |
| SULT1A3 | 6818 PharmGKB        | acetaminophe   | acetaminophen       | ACETAMINOPHEN                   | chembl:CHEMBL112     | 1.63  |
| SULT1A4 | 445329 PharmGKB      | morphine       | morphine            | MORPHINE                        | chembl:CHEMBL70      | 1.03  |
| SULT1C3 | 442038 PharmGKB      | candesartan    | candesartan         | CANDESARTAN                     | chembl:CHEMBL1016    | 14.14 |
| SULT1C4 | 27233 PharmGKB       | docetaxel      | docetaxel           | DOCETAXEL                       | chembl:CHEMBL92      | 0.81  |
| SULT1E1 | 6783 PharmGKB        | acetaminophe   | acetaminophen       | ACETAMINOPHEN                   | chembl:CHEMBL112     | 4.9   |
| SULT2A1 | 6822 DTC             | EMATE          | EMATE               | EMATE                           | chembl:CHEMBL122708  | 15.91 |
| SULT2B1 | 6820 PharmGKB        | cytarabine     | cytarabine          | CYTARABINE                      | chembl:CHEMBL803     | 0.99  |
| SUMO1   | 7341 DTC             | 3,8'-BIAPIGE   | 3,8'-BIAPIGENIN     | CHEMBL515252                    | chembl:CHEMBL515252  | 0.24  |
| SUMO2   | 6613 DTC             | BITHIONOL      | BITHIONOLOXIDE      | BITHIONOLOXIDE                  | chembl:CHEMBL1603949 | 4.55  |
| SUMO4   | 387082 PharmGKB      | tacrolimus     | tacrolimus          | TACROLIMUS                      | chembl:CHEMBL269732  | 3.74  |
| SUV39H1 | 6839 GuideToPharmac  | inhibitor      | 252166599           | CHAETOCIN                       | chembl:CHEMBL1089316 | 31.83 |
| SV2A    | 9900 TTD             | Brivaracetam   | Brivaracetam        | BRIVARACETAM                    | chembl:CHEMBL607400  | 15.91 |
| SV2C    | 22987 PharmGKB       | olanzapine     | olanzapine          | OLANZAPINE                      | chembl:CHEMBL715     | 0.94  |
| SYK     | 6850 GuideToPharmac  | inhibitor      | 328083490           | GSK143                          |                      |       |
| SYP     | 6855 NCI             | DIMETHYL       | DIMETHYL            | SULFOXIDE                       |                      |       |
| SYT1    | 6857 PharmGKB        | cocaine        | cocaine             | COCAINE                         | chembl:CHEMBL370805  | 6.06  |
| SYT2    | 127833 TdgClinical   | Trial          | BOTULINUM           | BOTULINUM TOXIN TYPE B          |                      |       |
| TAAR1   | 134864 DTC           | S-(2-CHLORS-   | (2-CHLOROBENZYL)ISO | CHEMBL1224310                   | chembl:CHEMBL1224310 | 2.12  |
| TAAR6   | 319100 PharmGKB      | corticosteroid | corticosteroids     |                                 |                      |       |
| TAB2    | 23118 PharmGKB       | gefitinib      | gefitinib           | GEFITINIB                       | chembl:CHEMBL939     | 1.87  |
| TAC1    | 6863 NCI             | PUROMYCIN      | PUROMYCIN           | PUROMYCIN                       | chembl:CHEMBL469912  | 0.72  |
| TAC3    | 6866 NCI             | TRIIODOTH      | TRIIODOTHYRONINE    | LIOthyRONINE SODIUM             | chembl:CHEMBL1201119 | 4.24  |
| TACR1   | 6869 TTD             | VESTIPITAN     | VESTIPITANT         | MESYLATE                        |                      |       |
| TACR2   | 6865 GuideToPharmac  | agonist        | 135652015           | [BALA8]NEUROKININ A-(4-10)      |                      |       |

|         |                       |            |                                         |                                |                          |                      |       |
|---------|-----------------------|------------|-----------------------------------------|--------------------------------|--------------------------|----------------------|-------|
| TACR3   | 6870 GuideToPharmac   | antagonist | 135650800 PD157672                      |                                |                          |                      |       |
| TACSTD2 | 4070 GuideToPharmac   | antibody   | 249565933 SACITUZUMAB GOVITECAN         |                                |                          |                      |       |
| TAF1    | 6872 GuideToPharmac   | inhibitor  | 336446910 BAY-299                       |                                |                          |                      |       |
| TAGLN   | 6876 NCI              |            | 5-AZACYTII5-AZACYTIDINE                 | AZACITIDINE                    | chembl:CHEMBL1489        |                      | 3.74  |
| TANC1   | 85461 PharmGKB        |            | radiotherapy                            | radiotherapy                   |                          |                      |       |
| TANC2   | 26115 PharmGKB        |            | calcium chan                            | calcium channel blockers       |                          |                      |       |
| TAOK1   | 57551 DTC             |            | PHA-767491 PHA-767491                   | CHEMBL225519                   | chembl:CHEMBL225519      |                      | 0.03  |
| TAOK3   | 51347 GuideToPharmac  | inhibitor  | 249565794 COMPOUND 89S [PMID: 19115845] |                                |                          |                      |       |
| TAPBP   | 6892 PharmGKB         |            | aspirin                                 | aspirin                        | ASPIRIN                  | chembl:CHEMBL25      | 1.74  |
| TARDBP  | 23435 DTC             |            | 1,7-O-DIACET                            | 1,7-O-DIACETYLMETHYL           | CHEMBL1889303            | chembl:CHEMBL1889303 | 0.14  |
| TAS2R16 | 50833 PharmGKB        |            | ethanol                                 | ethanol                        | ALCOHOL                  | chembl:CHEMBL545     | 0.74  |
| TAS2R31 | 259290 GuideToPharmac | antagonist | 315661196 6-METHOXYS                    | AKURANET                       | CHEMBL210692             | chembl:CHEMBL210692  | 63.65 |
| TASPI   | 55617 GuideToPharmac  | inhibitor  | 252827510 YZM18                         |                                |                          |                      |       |
| TAT     | 6898 NCI              |            | TETRACYCL                               | TETRACYCLINE                   | TETRACYCLINE             | chembl:CHEMBL1440    | 0.94  |
| TBC1D1  | 23216 PharmGKB        |            | olanzapine                              | olanzapine                     | OLANZAPINE               | chembl:CHEMBL715     | 0.94  |
| TBC1D32 | 221322 PharmGKB       |            | Bisphosphon                             | Bisphosphonates                |                          |                      |       |
| TBK1    | 29110 DTC             |            | TAMATINI                                | TAMATINIB                      | R-406                    | chembl:CHEMBL475251  | 0.09  |
| TBL1XR1 | 79718 PharmGKB        |            | allopurinol                             | allopurinol                    | ALLOPURINOL              | chembl:CHEMBL1467    | 4.39  |
| TBP     | 6908 NCI              |            | HORMONE                                 | HORMONES                       |                          |                      |       |
| TBX2    | 6909 PharmGKB         |            | atenolol                                | atenolol                       | ATENOLOL                 | chembl:CHEMBL24      | 3.74  |
| TBX21   | 30009 PharmGKB        |            | corticosteroid                          | corticosteroids                |                          |                      |       |
| TBXA2R  | 6915 TTD              |            | LAROPIPRAL                              | LAROPIPRANT                    | LAROPIPRANT              | chembl:CHEMBL426559  | 0.43  |
| TBXAS1  | 6916 TdgClinicalTrial |            | NV-52                                   | NV-52                          |                          |                      |       |
| TBXT    | 6862 PharmGKB         |            | flunisolide                             | flunisolide                    | FLUNISOLIDE              | chembl:CHEMBL1512    | 6.37  |
| TCF19   | 6941 PharmGKB         |            | nevirapine                              | nevirapine                     | NEVIRAPINE               | chembl:CHEMBL57      | 5.53  |
| TCF7L2  | 6934 PharmGKB         |            | sulfonamides                            | sulfonamides, urea derivatives |                          |                      |       |
| TCIM    | 56892 NCI             |            | ANTIANGIC                               | ANTIANGIOGENIC                 |                          |                      |       |
| TCN1    | 6947 NCI              |            | CYANOCO                                 | CYANOCOBALAMIN                 | CYANOCOBALAMIN           | chembl:CHEMBL2110563 | 42.43 |
| TDGF1   | 6997 TTD              |            | BIIB 015                                | BIIB 015                       |                          |                      |       |
| TDO2    | 6999 NCI              |            | DEXAMETH                                | DEXAMETHASONE                  | DEXAMETHASONE            | chembl:CHEMBL384467  | 0.51  |
| TDP1    | 55775 DTC             |            | FUMARPRO                                | FUMARPROTOCETRARIC             | FUMARPROTOCETRARIC ACID  | chembl:CHEMBL366861  | 0.09  |
| TDP2    | 51567 DTC             |            | 9,10-PHEN                               | 9,10-PHENANTHRENEQUIN          | 9,10-PHENANTHRENEQUINONE | chembl:CHEMBL51931   | 0.82  |
| TEAD1   | 7003 NCI              |            | DEXAMETH                                | DEXAMETHASONE                  | DEXAMETHASONE            | chembl:CHEMBL384467  | 1.52  |
| TEC     | 7006 GuideToPharmac   | inhibitor  | 318164804 PRN694                        |                                |                          |                      |       |
| TEK     | 7010 ChemblInteractio | inhibitor  | CHEMBL35                                | CE-245677                      | CE-245677                | chembl:CHEMBL3545120 | 3.54  |
| TENT4A  | 11044 PharmGKB        |            | gemcitabine                             | gemcitabine                    | GEMCITABINE              | chembl:CHEMBL888     | 1.57  |
| TEP1    | 7011 TdgClinicalTrial |            | V934/V935                               | V934/V935                      |                          |                      |       |
| TERC    | 7012 NCI              |            | AZIDOTHY                                | AZIDOTHYIMIDINE                | ZIDOVUDINE               | chembl:CHEMBL129     | 2.05  |
| TERT    | 7015 TTD              |            | KML-001                                 | KML-001                        |                          |                      |       |
| TESK1   | 7016 GuideToPharmac   | inhibitor  | 249565797 COMPOUND 31 [PMID: 22902653]  |                                |                          |                      |       |
| TESK2   | 10420 GuideToPharmac  | inhibitor  | 249565798 COMPOUND 30 [PMID: 22902653]  |                                |                          |                      |       |
| TET2    | 54790 JAX-CKB         |            | Azacitidine                             | Azacitidine                    | AZACITIDINE              | chembl:CHEMBL1489    | 1.87  |

|        |                               |                                       |                                                         |               |                      |       |
|--------|-------------------------------|---------------------------------------|---------------------------------------------------------|---------------|----------------------|-------|
| TEX10  | 54881 PharmGKB                | duloxetine                            | duloxetine                                              | DULOXETINE    | chembl:CHEMBL1175    | 6.37  |
| TF     | 7018 PharmGKB                 | adalimumab                            | adalimumab                                              | ADALIMUMAB    | chembl:CHEMBL1201580 | 3.74  |
| TFAP2A | 7020 NCI                      | HORMONES                              | HORMONES                                                |               |                      |       |
| TFF1   | 7031 TTD                      | AG-013                                | AG-013                                                  |               |                      |       |
| TFF2   | 7032 NCI                      | HORMONES                              | HORMONES                                                |               |                      |       |
| TFF3   | 7033 CIViC                    | TAMOXIFEN                             | TAMOXIFEN                                               | TAMOXIFEN     | chembl:CHEMBL83      | 1.08  |
| TFPI   | 7035 NCI                      | PI-88                                 | PI-88                                                   | MUPARFOSTAT   | chembl:CHEMBL4297163 | 1.27  |
| TFPI2  | 7980 NCI                      | HEPARIN                               | HEPARIN                                                 | HEPARIN       | chembl:CHEMBL1909300 | 4.39  |
| TG     | 7038 NCI                      | RETINOIDS                             | RETINOIDS                                               |               |                      |       |
| TGFA   | 7039 PharmGKB                 | panitumumab                           | panitumumab                                             | PANITUMUMAB   | chembl:CHEMBL1201827 | 1.52  |
| TGFB1  | 7040 TTD                      | Disitertide                           | Disitertide                                             | DISITER TIDE  | chembl:CHEMBL2108346 | 3.44  |
| TGFB2  | 7042 TTD                      | FANG vaccir                           | FANG vaccine                                            |               |                      |       |
| TGFB3  | 7043 TALC                     | antibody                              | FRESOLIMU                                               | FRESOLIMUMAB  | chembl:CHEMBL1743022 | 21.22 |
| TGFBR1 | 7046 GuideToPharmac           | inhibitor                             | 249565800 COMPOUND 13D [PMID: 23639540]                 |               |                      |       |
| TGFBR2 | 7048 GuideToPharmac           | agonist                               | 178101755 TGFB3                                         |               |                      |       |
| TGFBR3 | 7049 NCI                      | CYTOKINES                             | CYTOKINES                                               |               |                      |       |
| TGM2   | 7052 NCI                      | DEFEROXA                              | DEFEROXAMINE                                            | DEFEROXAMINE  | chembl:CHEMBL556     | 0.43  |
| TH     | 7054 TTD                      | L-Phenylalan                          | L-Phenylalanine                                         | PHENYLALANINE | chembl:CHEMBL301523  | 7.96  |
| THBD   | 7056 NCI                      | SIMVASTA                              | SIMVASTATIN                                             | SIMVASTATIN   | chembl:CHEMBL1064    | 0.47  |
| THBS1  | 7057 NCI                      | 5-AZA-2&A15-AZA-2&APOS;-DEOXYCYTIDINE |                                                         |               |                      |       |
| THBS2  | 7058 NCI                      | BEVACIZUM                             | BEVACIZUMAB                                             | BEVACIZUMAB   | chembl:CHEMBL1201583 | 4.11  |
| THBS4  | 7060 NCI                      | VASOPRES                              | VASOPRESSIN                                             | VASOPRESSIN   | chembl:CHEMBL373742  | 7.49  |
| THOP1  | 7064 TTD                      | Karenitecin                           | Karenitecin                                             | KARENITECIN   | chembl:CHEMBL1743260 | 10.61 |
| THPO   | 7066 DTC                      | SB-224289                             | SB-224289                                               | SB-224289     | chembl:CHEMBL281350  | 0.12  |
| THRA   | 7067 TdgClinicalTrial         | LEVOTHYR                              | LEVOTHYROXINE                                           | LEVOTHYROXINE | chembl:CHEMBL1624    | 6.37  |
| THRB   | 7068 DTC                      | LEVOTHYR                              | LEVOTHYROXINE                                           | LEVOTHYROXINE | chembl:CHEMBL1624    | 0.58  |
| THRSP  | 7069 NCI                      | ANTIOXIDA                             | ANTIOXIDANT                                             |               |                      |       |
| THSD7B | 80731 PharmGKB                | ethanol                               | ethanol                                                 | ALCOHOL       | chembl:CHEMBL545     | 1.48  |
| THY1   | 7070 NCI                      | HEL                                   | HEL                                                     |               |                      |       |
| TICAM1 | 148022 NCI                    | VACCINE                               | VACCINE                                                 |               |                      |       |
| TIE1   | 7075 GuideToPharmac           | inhibitor                             | 363894135 MERESTINIB                                    | MERESTINIB    | chembl:CHEMBL3545307 | 3.98  |
| TIGIT  | 201633 TTD                    | ASP8374                               | ASP8374                                                 | ASP-8374      | chembl:CHEMBL4297894 | 63.65 |
| TIRAP  | 114609 PharmGKB               | ustekinumab                           | ustekinumab                                             | USTEKINUMAB   | chembl:CHEMBL1201835 | 12.73 |
| TJP1   | 7082 PharmGKB                 | risperidone                           | risperidone                                             | RISPERIDONE   | chembl:CHEMBL85      | 0.25  |
| TK1    | 7083 PharmGKB                 | zidovudine                            | zidovudine                                              | ZIDOVUDINE    | chembl:CHEMBL129     | 0.68  |
| TK2    | 7084 NCI                      | DDC                                   | DDC                                                     | ZALCITABINE   | chembl:CHEMBL853     | 31.83 |
| TLE3   | 7090 ClarityFoundationBiomark | DOCETAXE                              | DOCETAXEL                                               | DOCETAXEL     | chembl:CHEMBL92      | 0.4   |
| TLK2   | 11011 CIViC                   | GO6983                                | GO6983                                                  |               |                      |       |
| TLR2   | 7097 TTD                      | OM-174                                | OM-174                                                  |               |                      |       |
| TLR3   | 7098 TTD                      | Rintatolimod                          | Rintatolimod                                            | RINTATOLIMOD  | chembl:CHEMBL2107862 | 31.83 |
| TLR4   | 7099 TTD                      | MPL-contain                           | MPL-containing Pollinex allergy desensitization vaccine |               |                      |       |
| TLR5   | 7100 PharmGKB                 | Tumor necros                          | Tumor necrosis factor alpha (TNF-alpha) inhibitors      |               |                      |       |

|           |                            |                                                    |                                    |              |                      |       |
|-----------|----------------------------|----------------------------------------------------|------------------------------------|--------------|----------------------|-------|
| TLR6      | 10333 TTD                  | MALP-2S MALP-2S                                    |                                    |              |                      |       |
| TLR7      | 51284 ChEMBLInteractio     | agonist CHEMBL128                                  | IMIQUIMOD                          | IMIQUIMOD    | chembl:CHEMBL1282    | 22.99 |
| TLR8      | 51311 GuideToPharmac       | agonist 315661111                                  | MOTOLIMOD                          | MOTOLIMOD    | chembl:CHEMBL3301618 | 38.19 |
| TLR9      | 54106 TTD                  | SD-101 SD-101                                      |                                    |              |                      |       |
| TMEM167A  | 153339 PharmGKB            | fluorouracil fluorouracil                          |                                    | FLUOROURACIL | chembl:CHEMBL185     | 1.21  |
| TMEM97    | 27346 TTD                  | ANAVEX 10ANAVEX 1007                               |                                    |              |                      |       |
| TMPRSS11D | 9407 GuideToPharmac        | inhibitor 252166870                                | COMPOUND 5 [PMID: 21741839]        |              |                      |       |
| TMPRSS15  | 5651 DTC                   | THONZONIITHONZONIUM BROMIDE                        | THONZONIUM BROMIDE                 |              | chembl:CHEMBL1200883 | 1.41  |
| TMPRSS2   | 7113 GuideToPharmac        | inhibitor 178103048                                | CAMOSTAT                           | CAMOSTAT     | chembl:CHEMBL590799  | 21.22 |
| TMPRSS6   | 164656 GuideToPharmac      | inhibitor 252166825                                | INHIBITOR 1 [COLOMBO ET AL., 2012] |              |                      |       |
| TMSB10    | 9168 NCI                   | RETINOIDS RETINOIDS                                |                                    |              |                      |       |
| TMX2      | 51075 PharmGKB             | ethanol ethanol                                    |                                    | ALCOHOL      | chembl:CHEMBL545     | 1.48  |
| TNC       | 3371 ChEMBLInteractions    | CHEMBL21(F16SIP                                    | F16SIP 1311                        |              | chembl:CHEMBL2109584 | 12.73 |
| TNF       | 7124 NCI                   | HYDROXYCHLOROQUINE                                 | HYDROXYCHLOROQUINE                 |              | chembl:CHEMBL1535    | 0.17  |
| TNFAIP1   | 7126 NCI                   | IL-2 IL-2                                          |                                    | ALDESLEUKIN  | wikidata:Q20801763   | 4.9   |
| TNFAIP3   | 7128 PharmGKB              | Tumor necrosis factor alpha (TNF-alpha) inhibitors |                                    |              |                      |       |
| TNFRSF10A | 8797 TTD                   | Mapatumumab                                        | MAPATUMUMAB                        |              | chembl:CHEMBL2108621 | 79.56 |
| TNFRSF10B | 8795 ChEMBLInteractio      | agonist CHEMBL21(DULANERMIN                        | DULANERMIN                         |              | chembl:CHEMBL2107846 | 13.64 |
| TNFRSF10C | 8794 NCI                   | TRAIL TRAIL                                        |                                    |              |                      |       |
| TNFRSF11A | 8792 PharmGKB              | Pyrazolones Pyrazolones                            |                                    |              |                      |       |
| TNFRSF11B | 4982 NCI                   | EPINEPHRINE                                        | EPINEPHRINE                        |              | chembl:CHEMBL679     | 0.85  |
| TNFRSF12A | 51330 TTD                  | Enavatuzumab                                       | ENAVATUZUMAB                       |              | chembl:CHEMBL1743011 | 127.3 |
| TNFRSF13B | 23495 TdgClinicalTrial     | LYMPHORAD                                          |                                    |              |                      |       |
| TNFRSF13C | 115650 GuideToPharmacology | 178101762                                          | BAFF                               | ARDENERMIN   | chembl:CHEMBL2108180 | 21.22 |
| TNFRSF14  | 8764 GuideToPharmacology   | 178101757                                          | LYMPHOTOXIN-A                      |              |                      |       |
| TNFRSF17  | 608 TTD                    | BCMA-CAR                                           | BCMA-CART                          |              |                      |       |
| TNFRSF18  | 8784 GuideToPharmacology   | 178101765                                          | TL6                                |              |                      |       |
| TNFRSF1A  | 7132 NCI                   | UVB UVB                                            |                                    |              |                      |       |
| TNFRSF1B  | 7133 NCI                   | CARBAMAZEPINE                                      | CARBAMAZEPINE                      |              | chembl:CHEMBL108     | 0.45  |
| TNFRSF25  | 8718 GuideToPharmacology   | 178101764                                          | TL1A                               |              |                      |       |
| TNFRSF4   | 7293 TTD                   | PF-04518600                                        | PF-04518600                        | IVUXOLIMAB   | chembl:CHEMBL4297883 | 21.22 |
| TNFRSF8   | 943 NCI                    | VITAMIN A                                          | VITAMIN A                          |              |                      |       |
| TNFRSF9   | 3604 TTD                   | PF-05082566                                        | PF-05082566                        | UTOMILUMAB   | chembl:CHEMBL3707324 | 63.65 |
| TNFSF10   | 8743 TTD                   | Ad5-TRAIL                                          | Ad5-TRAIL                          |              |                      |       |
| TNFSF11   | 8600 TALC                  | antibody DENOSUMAB                                 | DENOSUMAB                          |              | chembl:CHEMBL1237023 | 71.61 |
| TNFSF12   | 8742 TTD                   | BIIB 023                                           | BIIB 023                           |              |                      |       |
| TNFSF13   | 8741 TdgClinicalTrial      | TACI-IG                                            | TACI-IG                            | ATACICEPT    | chembl:CHEMBL1742986 | 95.48 |
| TNFSF13B  | 10673 TTD                  | Belimumab                                          | Belimumab                          | BELIMUMAB    | chembl:CHEMBL1789843 | 63.65 |
| TNFSF14   | 8740 ChEMBLInteractio      | inhibitor CHEMBL177                                | BAMINERCEPT                        | BAMINERCEPT  | chembl:CHEMBL1742988 | 31.83 |
| TNFSF4    | 7292 TTD                   | MRNA-2416                                          | MRNA-2416                          |              |                      |       |
| TNIK      | 23043 DTC                  | SB-202190                                          | SB-202190                          | SB-202190    | chembl:CHEMBL278041  | 0.91  |
| TNK1      | 8711 DTC                   | inhibitor TOZASERTIB                               | TOZASERTIB                         | TOZASERTIB   | chembl:CHEMBL572878  | 1.82  |

|             |                         |                     |                                      |                          |                      |       |
|-------------|-------------------------|---------------------|--------------------------------------|--------------------------|----------------------|-------|
| TNK2        | 10188 DTC               | CYC-116             | CYC-116                              | CYC-116                  | chembl:CHEMBL482967  | 0.03  |
| TNKS        | 8658 TTD                | PMID278410          | PMID27841036-Compound-37             |                          |                      |       |
| TNKS2       | 80351 GuideToPharmac    | inhibitor           | 404859121 NVP-TNKS656                |                          |                      |       |
| TNNC1       | 7134 TdgClinicalTrial   | TIRAMSETI           | TIRAMSETIV                           |                          |                      |       |
| TNNC2       | 7125 ChemblInteractio   | activator           | CHEMBL30:TIRASEMTIV                  | TIRASEMTIV               | chembl:CHEMBL3039529 | 21.22 |
| TNNI2       | 7136 ChemblInteractio   | activator           | CHEMBL30:TIRASEMTIV                  | TIRASEMTIV               | chembl:CHEMBL3039529 | 21.22 |
| TNNI3       | 7137 DTC                | PURPUROG            | PURPUROGALLIN                        | PURPUROGALLIN            | chembl:CHEMBL66953   | 0.59  |
| TNNT1       | 7138 TdgClinicalTrial   | TIRAMSETI           | TIRAMSETIV                           |                          |                      |       |
| TNNT2       | 7139 DTC                | PYROGALL            | PYROGALLOL RED                       | PYROGALLOL RED           | chembl:CHEMBL210208  | 0.85  |
| TNNT3       | 7140 ChemblInteractio   | activator           | CHEMBL30:TIRASEMTIV                  | TIRASEMTIV               | chembl:CHEMBL3039529 | 21.22 |
| TNRC6A      | 27327 PharmGKB          | ethanol             | ethanol                              | ALCOHOL                  | chembl:CHEMBL545     | 1.48  |
| TOB1        | 10140 NCI               | STEROID H           | STEROID HORMONE                      |                          |                      |       |
| TOLLIP      | 54472 PharmGKB          | acetylcysteine      | acetylcysteine                       | ACETYLCYSTEINE           | chembl:CHEMBL600     | 4.24  |
| TOP1        | 7150 PharmGKB           | SN-38               | SN-38                                | 7-ETHYL-10-HYDROXYCAMPTC | chembl:CHEMBL837     | 0.27  |
| TOP1MT      | 116447 TEND             | TOPOTECAI           | TOPOTECAN                            | TOPOTECAN                | chembl:CHEMBL84      | 2.83  |
| TOP2A       | 7153 ChemblInteractio   | inhibitor           | CHEMBL11{AMRUBICIN                   | AMRUBICIN                | chembl:CHEMBL1186894 | 1.59  |
| TOP2B       | 7155 TTD                | Salvicine           | Salvicine                            |                          |                      |       |
| TOR1A       | 1861 PharmGKB           | haloperidol         | haloperidol                          | HALOPERIDOL              | chembl:CHEMBL54      | 1.79  |
| TP53        | 7157 DTC                | CAULIBUGI           | CAULIBUGULONE D                      | CAULIBUGULONE D          | chembl:CHEMBL447876  | 0.08  |
| TP53AIP1    | 63970 PharmGKB          | epirubicin          | epirubicin                           | EPIRUBICIN               | chembl:CHEMBL417     | 0.71  |
| TP73        | 7161 NCI                | UVB                 | UVB                                  |                          |                      |       |
| TPBG        | 7162 ChemblInteractions | CHEMBL17{NAPTUMOMAB | ESTAFEN                              | NAPTUMOMAB ESTAFENATOX   | chembl:CHEMBL1743045 | 15.91 |
| TPCN1       | 53373 GuideToPharmac    | blocker             | 135652732 CD2+                       |                          |                      |       |
| TPCN2       | 219931 GuideToPharmac   | blocker             | 135651305 VERAPAMIL                  | VERAPAMIL                | chembl:CHEMBL6966    | 1.59  |
| TPH1        | 7166 PharmGKB           | citalopram          | citalopram                           | CITALOPRAM               | chembl:CHEMBL549     | 0.62  |
| TPH2        | 121278 GuideToPharmac   | inhibitor           | 178101333 FENFLURAMINE               | FENFLURAMINE             | chembl:CHEMBL87493   | 3.98  |
| TPK1        | 27010 NCI               | ANTIMETAI           | ANTIMETABOLITE                       |                          |                      |       |
| TPM3        | 7170 NCI                | METHOTRE            | METHOTREXATE                         | METHOTREXATE             | chembl:CHEMBL34259   | 0.15  |
| TPMT        | 7172 PharmGKB           | prednisone          | prednisone                           | PREDNISONONE             | chembl:CHEMBL635     | 0.44  |
| TPO         | 7173 TTD                | Methimazole         | Methimazole                          | METHIMAZOLE              | chembl:CHEMBL1515    | 14.14 |
| TPP1        | 1200 TTD                | Cerliponase         | Cerliponase Alfa                     |                          |                      |       |
| TPP2        | 7174 GuideToPharmac     | inhibitor           | 252166782 EXAMPLE 8 [WO1999033801A1] |                          |                      |       |
| TPSAB1      | 7177 GuideToPharmac     | inhibitor           | 318164852 RWJ-56423                  | CHEMBL256892             | chembl:CHEMBL256892  | 10.61 |
| TPSB2       | 64499 NCI               | SALT                | SALT                                 | VOLANESORSEN SODIUM      | chembl:CHEMBL3544989 | 5.3   |
| TPSD1       | 23430 NCI               | CETIRIZINE          | CETIRIZINE                           | CETIRIZINE               | chembl:CHEMBL1000    | 12.73 |
| TPT1        | 7178 NCI                | 5-FLUOROU           | 5-FLUOROURACIL                       | FLUOROURACIL             | chembl:CHEMBL185     | 1.21  |
| TRAF1       | 7185 PharmGKB           | adalimumab          | adalimumab                           | ADALIMUMAB               | chembl:CHEMBL1201580 | 2.5   |
| TRAF3IP2    | 10758 PharmGKB          | nevirapine          | nevirapine                           | NEVIRAPINE               | chembl:CHEMBL57      | 2.77  |
| TRAP1       | 10131 GuideToPharmac    | inhibitor           | 315661336 LUMINESPIB                 | LUMINESPIB               | chembl:CHEMBL252164  | 15.91 |
| TRBC1       | 28639 TTD               | TRBC1               | TRBC1                                |                          |                      |       |
| TRBV20OR9-2 | 6962 TTD                | NY-ESO-TCI          | NY-ESO-TCR                           |                          |                      |       |
| TREML4      | 285852 PharmGKB         | duloxetine          | duloxetine                           | DULOXETINE               | chembl:CHEMBL1175    | 6.37  |

|         |                                  |                                                      |                       |                      |       |
|---------|----------------------------------|------------------------------------------------------|-----------------------|----------------------|-------|
| TRGV3   | 6976 ChEMBLInteraction inhibitor | CHEMBL21(TOL-101                                     | TOL-101               | chembl:CHEMBL2109591 | 15.91 |
| TRH     | 7200 NCI                         | ERYTHRO ERYTHRO                                      |                       |                      |       |
| TRHR    | 7201 TTD                         | Protirelin Protirelin                                | PROTIRELIN            | chembl:CHEMBL1472    | 25.46 |
| TRIB2   | 28951 PharmGKB                   | allopurinol allopurinol                              | ALLOPURINOL           | chembl:CHEMBL1467    | 4.39  |
| TRIB3   | 57761 PharmGKB                   | methylphenidmethylphenidate                          | METHYLPHENIDATE       | chembl:CHEMBL796     | 2.83  |
| TRIM24  | 8805 GuideToPharmacology         | 387065618 DTRIM24                                    |                       |                      |       |
| TRIM5   | 85363 PharmGKB                   | carboplatin carboplatin                              | CARBOPLATIN           | chembl:CHEMBL1351    | 0.4   |
| TRIT1   | 54802 NCI                        | 5-AZACYTII5-AZACYTIDINE                              | AZACITIDINE           | chembl:CHEMBL1489    | 3.74  |
| TRPA1   | 8989 GuideToPharmacblocker       | 381744957 AM-0902                                    |                       |                      |       |
| TRPC1   | 7220 GuideToPharmacblocker       | 135649695 2-APB                                      |                       |                      |       |
| TRPC3   | 7222 GuideToPharmacblocker       | 178103669 NORGESTIMATE                               | NORGESTIMATE          | chembl:CHEMBL1200934 | 6.37  |
| TRPC4   | 7223 GuideToPharmacblocker       | 381744969 M084                                       |                       |                      |       |
| TRPC5   | 7224 GuideToPharmacactivator     | 381744970 BTD                                        |                       |                      |       |
| TRPC6   | 7225 GuideToPharmacblocker       | 135649885 ACAA                                       |                       |                      |       |
| TRPC7   | 57113 GuideToPharmacblocker      | 374883855 SH045                                      |                       |                      |       |
| TRPM1   | 4308 GuideToPharmacblocker       | 135652747 ZN2+                                       |                       |                      |       |
| TRPM2   | 7226 GuideToPharmacblocker       | 135650269 FLUFENAMIC ACID                            |                       |                      |       |
| TRPM3   | 80036 GuideToPharmacactivator    | 53801018 SPHINGOSINE                                 | SPHINGOSINE           | chembl:CHEMBL67166   | 1.93  |
| TRPM4   | 54795 GuideToPharmacinhibitor    | 135651427 ADP                                        | ADENOSINE DIPHOSPHATE | chembl:CHEMBL14830   | 2.12  |
| TRPM5   | 29850 GuideToPharmacblocker      | 135650269 FLUFENAMIC ACID                            |                       |                      |       |
| TRPM6   | 140803 GuideToPharmacblocker     | 135652746 RUTHENIUM RED                              |                       |                      |       |
| TRPM7   | 54822 GuideToPharmacblocker      | 178101079 NAFAMOSTAT                                 | NAFAMOSTAT            | chembl:CHEMBL273264  | 2.89  |
| TRPM8   | 79054 GuideToPharmacblocker      | 135651503 LINOLEIC ACID                              |                       |                      |       |
| TRPV1   | 7442 TTD                         | PMID256666PMID25666693-Compound-23                   |                       |                      |       |
| TRPV2   | 51393 GuideToPharmacblocker      | 135652740 LA3+                                       |                       |                      |       |
| TRPV3   | 162514 GuideToPharmacblocker     | 381744984 FORSYTHOSIDE B                             |                       |                      |       |
| TRPV4   | 59341 TTD                        | GSK2798745GSK2798745                                 | GSK2798745            | chembl:CHEMBL3707225 | 63.65 |
| TRPV5   | 56302 GuideToPharmacblocker      | 135650220 ECONAZOLE                                  | ECONAZOLE             | chembl:CHEMBL808     | 10.61 |
| TRPV6   | 55503 TTD                        | SOR-C13 SOR-C13                                      | SOR-C13               | chembl:CHEMBL4228250 | 63.65 |
| TSC1    | 7248 CIViC                       | SIROLIMUS SIROLIMUS                                  | SIROLIMUS             | chembl:CHEMBL413     | 0.76  |
| TSC2    | 7249 CIViC                       | EVEROLIMIEVEROLIMUS                                  | EVEROLIMUS            | chembl:CHEMBL1908360 | 6.53  |
| TSC22D3 | 1831 NCI                         | HYDROCORHYDROCORTISONE                               | HYDROCORTISONE        | chembl:CHEMBL389621  | 1.68  |
| TSG101  | 7251 DTC                         | FLUORANT.FLUORANTHEN-3-YLAMICHEMBL103583             | CHEMBL103583          | chembl:CHEMBL103583  | 0.61  |
| TSHB    | 7252 NCI                         | AZATHIOPRAZATHIOPRINE                                | AZATHIOPRINE          | chembl:CHEMBL1542    | 0.46  |
| TSHR    | 7253 DTC                         | SIBUTRAMISIBUTRAMINE HYDROCHSIBUTRAMINE HYDROCHLORII | chembl:CHEMBL1200765  | chembl:CHEMBL1200765 | 0.12  |
| TSHZ2   | 128553 PharmGKB                  | allopurinol allopurinol                              | ALLOPURINOL           | chembl:CHEMBL1467    | 4.39  |
| TSLP    | 85480 TTD                        | MEDI9929 MEDI9929                                    |                       |                      |       |
| TSPAN5  | 10098 PharmGKB                   | citalopram citalopram                                | CITALOPRAM            | chembl:CHEMBL549     | 1.87  |
| TSPO    | 706 TTD                          | Quinoline carQuinoline carboxamide derivative 7      |                       |                      |       |
| TSPYL1  | 7259 PharmGKB                    | prednisolone prednisolone                            | PREDNISOLONE          | chembl:CHEMBL131     | 1.22  |
| TSPYL2  | 64061 NCI                        | BROMODECBROMODEOXYURIDINE                            |                       |                      |       |
| TSSK1B  | 83942 DTC                        | GSK-269962.GSK-269962A                               | GSK-269962A           | chembl:CHEMBL220241  | 0.18  |

|         |                           |               |               |                                |                      |                      |                     |      |
|---------|---------------------------|---------------|---------------|--------------------------------|----------------------|----------------------|---------------------|------|
| TSSK2   | 23617 DTC                 | GW843682X     | GW843682X     | GW843682X                      | chembl:CHEMBL514499  | 0.33                 |                     |      |
| TTC37   | 9652 PharmGKB             | duloxetine    | duloxetine    | DULOXETINE                     | chembl:CHEMBL1175    | 6.37                 |                     |      |
| TTK     | 7272 GuideToPharmac       | inhibitor     | 328083505     | RO3280                         |                      |                      |                     |      |
| TTN     | 7273 NCI                  | PROTEASE      | PROTEASE      | INHIBITORS                     |                      |                      |                     |      |
| TTR     | 7276 FDA                  | Tafamidis     | Tafamidis     | TAFAMIDIS                      | chembl:CHEMBL2103837 | 35.36                |                     |      |
| TUB     | 7275 TTD                  | Docetaxel     | Docetaxel     | DOCETAXEL                      | chembl:CHEMBL92      | 0.06                 |                     |      |
| TUBA1A  | 7846 TdgClinicalTrial     | MEBENDAZ      | MEBENDAZOLE   | MEBENDAZOLE                    | chembl:CHEMBL685     | 2.12                 |                     |      |
| TUBA1B  | 10376 ChemblInteractio    | inhibitor     | CHEMBL53{     | VINORELBIN DITARTRAT           | VINORELBINE TARTRATE | chembl:CHEMBL538943  | 0.1                 |      |
| TUBA1C  | 84790 ChemblInteractio    | inhibitor     | CHEMBL37{     | VINBLASTINE SULFATE            | VINBLASTINE SULFATE  | chembl:CHEMBL378544  | 0.08                |      |
| TUBA3C  | 7278 DTC                  | VINCRISTIN    | VINCRISTINE   | VINCRISTINE                    | chembl:CHEMBL90555   | 0.21                 |                     |      |
| TUBA3D  | 113457 DTC                | ZAMPANOL      | ZAMPANOLIDE   | ZAMPANOLIDE                    | chembl:CHEMBL582439  | 0.19                 |                     |      |
| TUBA3E  | 112714 ChemblInteractio   | inhibitor     | CHEMBL10{     | COLCHICINE                     | COLCHICINE           | chembl:CHEMBL107     | 0.29                |      |
| TUBA4A  | 7277 DTC                  | MAYTANSI      | MAYTANSINOL   | MAYTANSINOL                    | chembl:CHEMBL214154  | 0.19                 |                     |      |
| TUBB    | 203068 GuideToPharmac     | inhibitor     | 135652721     | PACLITAXEL                     | PACLITAXEL           | chembl:CHEMBL428647  | 0.19                |      |
| TUBB1   | 81027 TEND                | PACLITAXE     | PACLITAXEL    | PACLITAXEL                     | chembl:CHEMBL428647  | 0.25                 |                     |      |
| TUBB2A  | 7280 DTC                  | VINORELBI     | VINORELBINE   | BASE                           | VINORELBINE          | chembl:CHEMBL553025  | 0.23                |      |
| TUBB2B  | 347733 ChemblInteractio   | inhibitor     | CHEMBL17{     | BRENTUXIMAB VEDOTIN            | BRENTUXIMAB VEDOTIN  | chembl:CHEMBL1742994 | 0.1                 |      |
| TUBB3   | 10381 DTC                 | PODOFILOX     | PODOFILOX     | PODOFILOX                      | chembl:CHEMBL61      | 0.26                 |                     |      |
| TUBB4A  | 10382 DTC                 | 4-(PHENYL     | 4-(PHENYL     | CARBAMOYL)                     | CHEMBL1795737        | chembl:CHEMBL1795737 | 0.38                |      |
| TUBB4B  | 10383 DTC                 | MAYTANSI      | MAYTANSINE    | MAYTANSINE                     | chembl:CHEMBL292702  | 0.19                 |                     |      |
| TUBB6   | 84617 ChemblInteractio    | inhibitor     | CHEMBL17{     | BRENTUXIMAB VEDOTIN            | BRENTUXIMAB VEDOTIN  | chembl:CHEMBL1742994 | 0.1                 |      |
| TUBB8   | 347688 ChemblInteractions |               | CHEMBL21{     | PACLITAXEL POLIGLUMEPACLITAXEL | POLIGLUMEX           | chembl:CHEMBL2108628 | 0.11                |      |
| TUSC2   | 11334 TTD                 | CNVN-202      | CNVN-202      |                                |                      |                      |                     |      |
| TXK     | 7294 GuideToPharmac       | inhibitor     | 178102336     | BOSUTINIB                      | BOSUTINIB            | chembl:CHEMBL288441  | 0.84                |      |
| TXN     | 7295 DTC                  | GAMBOGIC      | GAMBOGIC      | ACID                           | GAMBOGIC             | ACID                 | chembl:CHEMBL555017 | 3.54 |
| TXN2    | 25828 DTC                 | GAMBOGIC      | GAMBOGIC      | ACID                           | GAMBOGIC             | ACID                 | chembl:CHEMBL555017 | 4.71 |
| TXNDC11 | 51061 PharmGKB            | hydrochloro   | hydrochloro   | thiazide                       | HYDROCHLOROTHIAZIDE  | chembl:CHEMBL435     | 1.77                |      |
| TXNIP   | 10628 NCI                 | FAS-LIGAN     | FAS-LIGAN     |                                |                      |                      |                     |      |
| TXNRD1  | 7296 TTD                  | 4-aryl quinol | 4-aryl quinol | derivative                     | 7                    |                      |                     |      |
| TXNRD2  | 10587 TdgClinicalTrial    | MOTEXAFIN     | MOTEXAFIN     | GADOLINIUM                     |                      |                      |                     |      |
| TXNRD3  | 114112 TdgClinicalTrial   | MOTEXAFIN     | MOTEXAFIN     | GADOLINIUM                     |                      |                      |                     |      |
| TYK2    | 7297 GuideToPharmac       | inhibitor     | 178102342     | FEDRATINIB                     | FEDRATINIB           | chembl:CHEMBL1287853 | 0.34                |      |
| TYMP    | 1890 NCI                  | FLUOROUR      | FLUOROURACIL  | FLUOROURACIL                   | chembl:CHEMBL185     | 0.4                  |                     |      |
| TYMS    | 7298 ChemblInteractio     | inhibitor     | CHEMBL12{     | PEMETREXED DISODIUM            |                      |                      |                     |      |
| TYMSOS  | 494514 PharmGKB           | azathioprine  | azathioprine  | AZATHIOPRINE                   | chembl:CHEMBL1542    | 0.39                 |                     |      |
| TYR     | 7299 TTD                  | Resorcinol    | ccResorcinol  | compound                       | 2                    |                      |                     |      |
| TYRO3   | 7301 TTD                  | KRDULPYO      | KRDULPYO      | VRWKMA-UHFFFAOYSA-N            |                      |                      |                     |      |
| TYRP1   | 7306 TTD                  | Flanvotumab   | Flanvotumab   | FLANVOTUMAB                    | chembl:CHEMBL2108734 | 127.3                |                     |      |
| U2AF1   | 7307 JAX-CKB              | N/A           | N/A           |                                |                      |                      |                     |      |
| UBA1    | 7317 DTC                  | HYRTIOER      | HYRTIOER      | ECTINE B                       | HYRTIOERECTINE B     | chembl:CHEMBL526126  | 63.65               |      |
| UBA2    | 10054 DTC                 | LOBARIC       | LOBARIC       | ACID                           | LOBARIC              | ACID                 | chembl:CHEMBL551842 | 0.53 |
| UBA3    | 9039 ChemblInteractio     | inhibitor     | CHEMBL12{     | PEVONEDISTAT                   | PEVONEDISTAT         | chembl:CHEMBL1231160 | 31.83               |      |

|         |                          |               |                                          |                          |                      |        |
|---------|--------------------------|---------------|------------------------------------------|--------------------------|----------------------|--------|
| UBC     | 7316 TTD                 | PMID255537    | PMID25553724-Compound-US20130237529 35   |                          |                      |        |
| UBE2D1  | 7321 NCI                 | DESFERRIO     | DESFERRIOXAMINE                          | DEFEROXAMINE             | chembl:CHEMBL556     | 9.09   |
| UBE2I   | 7329 PharmGKB            | cisplatin     | cisplatin                                | CISPLATIN                | chembl:CHEMBL11359   | 0.44   |
| UBE2N   | 7334 DTC                 | NSC-60340     | NSC-60340                                | CHEMBL1534034            | chembl:CHEMBL1534034 | 0.25   |
| UBE2T   | 29089 TTD                | MK-2206       | MK-2206                                  | MK-2206                  | chembl:CHEMBL1079175 | 3.74   |
| UBR1    | 197131 NCI               | DEXAMETH      | DEXAMETHASONE                            | DEXAMETHASONE            | chembl:CHEMBL384467  | 1.52   |
| UCHL1   | 7345 GuideToPharmac      | inhibitor     | 252166861 LDN-91946                      |                          |                      |        |
| UCHL3   | 7347 GuideToPharmac      | inhibitor     | 252166860 COMPOUND 6 [PMID: 17948018]    |                          |                      |        |
| UCHL5   | 51377 TTD                | PMID260776    | PMID26077642-Compound-Figure3A           |                          |                      |        |
| UCP1    | 7350 NCI                 | STREPTOZ      | STREPTOZOTOCIN                           | STREPTOZOCIN             | chembl:CHEMBL1651906 | 0.92   |
| UCP2    | 7351 NCI                 | INTRALIPID    | INTRALIPID                               | SOYBEAN OIL              | chembl:CHEMBL1201485 | 6.37   |
| UCP3    | 7352 TTD                 | CL-316,243    | CL-316,243                               |                          |                      |        |
| UGCG    | 7357 TTD                 | Eliglustat    | Eliglustat tartrate                      |                          |                      |        |
| UGDH    | 7358 NCI                 | ACETYLSAI     | ACETYLSALICYLIC ACID                     |                          |                      |        |
| UGGT2   | 55757 PharmGKB           | hydrochlorot  | hydrochlorothiazide                      | HYDROCHLOROTHIAZIDE      | chembl:CHEMBL435     | 1.77   |
| UGT1A   | 7361 PharmGKB            | bilirubin     | bilirubin                                | BILIRUBIN                | chembl:CHEMBL501680  | 7.96   |
| UGT1A1  | 54658 CIViC              | BELINOSTA     | BELINOSTAT                               | BELINOSTAT               | chembl:CHEMBL408513  | 0.39   |
| UGT1A10 | 54575 NCI                | ANTINEOPL     | ANTINEOPLASTIC AGENT                     |                          |                      |        |
| UGT1A3  | 54659 PharmGKB           | atazanavir    | atazanavir                               | ATAZANAVIR               | chembl:CHEMBL1163    | 1.01   |
| UGT1A4  | 54657 NCI                | NICOTINE      | NICOTINE                                 | NICOTINE                 | chembl:CHEMBL3       | 0.19   |
| UGT1A5  | 54579 PharmGKB           | febuxostat    | febuxostat                               | FEBUXOSTAT               | chembl:CHEMBL1164729 | 1.18   |
| UGT1A6  | 54578 PharmGKB           | daunorubicin  | daunorubicin                             | DAUNORUBICIN             | chembl:CHEMBL178     | 0.08   |
| UGT1A7  | 54577 NCI                | NICOTINE      | NICOTINE                                 | NICOTINE                 | chembl:CHEMBL3       | 0.29   |
| UGT1A8  | 54576 PharmGKB           | febuxostat    | febuxostat                               | FEBUXOSTAT               | chembl:CHEMBL1164729 | 0.96   |
| UGT1A9  | 54600 PharmGKB           | SN-38         | SN-38                                    | 7-ETHYL-10-HYDROXYCAMPTC | chembl:CHEMBL837     | 0.69   |
| UGT2A1  | 10941 PharmGKB           | imatinib      | imatinib                                 | IMATINIB                 | chembl:CHEMBL941     | 1.99   |
| UGT2B10 | 7365 PharmGKB            | nicotine      | nicotine                                 | NICOTINE                 | chembl:CHEMBL3       | 2.6    |
| UGT2B15 | 7366 PharmGKB            | phenobarbital | phenobarbital                            | PHENOBARBITAL            | chembl:CHEMBL40      | 0.57   |
| UGT2B17 | 7367 PharmGKB            | ibuprofen     | ibuprofen                                | IBUPROFEN                | chembl:CHEMBL521     | 3.74   |
| UGT2B4  | 7363 PharmGKB            | ibuprofen     | ibuprofen                                | IBUPROFEN                | chembl:CHEMBL521     | 3.74   |
| UGT2B7  | 7364 PharmGKB            | methadone     | methadone                                | METHADONE                | chembl:CHEMBL651     | 0.32   |
| ULK1    | 8408 GuideToPharmac      | inhibitor     | 249565893 COMPOUND R-16 [PMID: 21967808] |                          |                      |        |
| ULK3    | 25989 GuideToPharmac     | inhibitor     | 249565900 COMPOUND 15 [PMID: 24900237]   |                          |                      |        |
| UMOD    | 7369 PharmGKB            | cyclosporine  | cyclosporine                             | CYCLOSPORINE             | chembl:CHEMBL160     | 2.05   |
| UMPS    | 7372 PharmGKB            | capecitabine  | capecitabine                             | CAPECITABINE             | chembl:CHEMBL1773    | 1.41   |
| UNC119  | 9094 GuideToPharmacology |               | 374883853 SQUARUNKIN A                   |                          |                      |        |
| UNC13D  | 201294 PharmGKB          | emapalumab    | emapalumab                               | EMAPALUMAB               | chembl:CHEMBL3989977 | 15.91  |
| UOX     | 391051 NCI               | POLYETHY      | POLYETHYLENE GLYCOL                      |                          |                      |        |
| UQCR10  | 29796 DTC                | FAMOXAD       | FAMOXADONE                               | FAMOXADONE               | chembl:CHEMBL10118   | 190.95 |
| UQCRB   | 7381 DTC                 | TERPESTA      | TERPESTACIN                              | TERPESTACIN              | chembl:CHEMBL1669042 | 127.3  |
| USP1    | 7398 DTC                 | GNF-PF-551    | GNF-PF-5510                              | CHEMBL578741             | chembl:CHEMBL578741  | 0.01   |
| USP14   | 9097 GuideToPharmac      | inhibitor     | 252827537 IU1                            |                          |                      |        |

|          |                                  |                                        |                     |                      |       |
|----------|----------------------------------|----------------------------------------|---------------------|----------------------|-------|
| USP2     | 9099 DTC                         | QUINALIZA QUINALIZARIN                 | QUINALIZARIN        | chembl:CHEMBL29898   | 0.16  |
| USP5     | 8078 DTC                         | VIALININ A VIALININ A                  | VIALININ A          | chembl:CHEMBL2012938 | 127.3 |
| USP7     | 7874 TTD                         | PMID260776 PMID26077642-Compound-Vifl  |                     |                      |       |
| USP9Y    | 8287 NCI                         | TESTOSTERTESTOSTERONE                  | TESTOSTERONE        | chembl:CHEMBL386630  | 3.54  |
| UST      | 10090 PharmGKB                   | nortriptyline nortriptyline            | NORTRIPTYLINE       | chembl:CHEMBL445     | 15.91 |
| UTRN     | 7402 NCI                         | ENZYME IN ENZYME INHIBITOR             |                     |                      |       |
| UTS2R    | 2837 GuideToPharmac antagonist   | 329968377 JNJ-39319202                 |                     |                      |       |
| VAC14    | 55697 PharmGKB                   | docetaxel docetaxel                    | DOCETAXEL           | chembl:CHEMBL92      | 0.81  |
| VAMP1    | 6843 TTD                         | Botulinum Tc Botulinum Toxin Type B    |                     |                      |       |
| VAMP2    | 6844 TdgClinicalTrial            | BOTULINUM BOTULINUM TOXIN TYPE B       |                     |                      |       |
| VASP     | 7408 PharmGKB                    | hydrochloroth hydrochlorothiazide      | HYDROCHLOROTHIAZIDE | chembl:CHEMBL435     | 1.77  |
| VAV1     | 7409 NCI                         | PHORBOL M PHORBOL MYRISTATE ACETATE    |                     |                      |       |
| VCAM1    | 7412 NCI                         | TROGLITAZ TROGLITAZONE                 | TROGLITAZONE        | chembl:CHEMBL408     | 1.22  |
| VCAN     | 1462 NCI                         | CSA CSA                                | CYCLOSPORINE        | chembl:CHEMBL160     | 2.05  |
| VCP      | 7415 DTC                         | AMEN TO FLAMEN TO FLAVONE              | AMEN TO FLAVONE     | chembl:CHEMBL63354   | 2.65  |
| VDAC1    | 7416 TTD                         | VDA-1102 tc VDA-1102 topical ointment  |                     |                      |       |
| VDAC2    | 7417 TdgClinicalTrial            | OLESOXIM IOLESOXIME                    | OLESOXIME           | chembl:CHEMBL3545254 | 15.91 |
| VDAC3    | 7419 TdgClinicalTrial            | OLESOXIM IOLESOXIME                    | OLESOXIME           | chembl:CHEMBL3545254 | 15.91 |
| VDR      | 7421 DTC                         | NIFEKALAN NIFEKALANT                   | NIFEKALANT          | chembl:CHEMBL360861  | 0.14  |
| VEGFA    | 7422 NCI                         | ANTHRACY ANTHRACYCLINE                 |                     |                      |       |
| VEGFB    | 7423 ChemblInteraction inhibitor | CHEMBL21 (CONBERCEPT                   | CONBERCEPT          | chembl:CHEMBL2108313 | 3.98  |
| VEGFC    | 7424 PharmGKB                    | bevacizumab bevacizumab                | BEVACIZUMAB         | chembl:CHEMBL1201583 | 1.03  |
| VHL      | 7428 JAX-CKB                     | Everolimus Everolimus                  | EVEROLIMUS          | chembl:CHEMBL1908360 | 0.33  |
| VIM      | 7431 NCI                         | ENU ENU                                |                     |                      |       |
| VIP      | 7432 NCI                         | RIBAVIRIN RIBAVIRIN                    | RIBAVIRIN           | chembl:CHEMBL1643    | 0.55  |
| VIPR1    | 7433 NCI                         | IL-2 IL-2                              | ALDESLEUKIN         | wikidata:Q20801763   | 1.63  |
| VIPR2    | 7434 GuideToPharmac agonist      | 135652544 [125I]PACAP-27               |                     |                      |       |
| VKORC1   | 79001 TTD                        | Tecarfarin Tecarfarin                  | TECARFARIN          | chembl:CHEMBL2105664 | 11.57 |
| VKORC1L1 | 154807 TdgClinicalTrial          | MENADION MENADIONE                     | MENADIONE           | chembl:CHEMBL590     | 6.82  |
| VNN1     | 8876 GuideToPharmac inhibitor    | 381118911 EXAMPLE 25 [WO2018228934]    |                     |                      |       |
| VPS35    | 55737 DTC                        | MELAGATRMELAGATRAN                     | MELAGATRAN          | chembl:CHEMBL266349  | 21.22 |
| VPS37A   | 137492 CIViC                     | CETUXIMA I CETUXIMAB                   | CETUXIMAB           | chembl:CHEMBL1201577 | 2.96  |
| VSIR     | 64115 TTD                        | JNJ-6161058 JNJ-61610588               | ONVATILIMAB         | chembl:CHEMBL4298000 | 63.65 |
| VWF      | 7450 TdgClinicalTrial            | FACTOR VII FACTOR VIII                 |                     |                      |       |
| WAS      | 7454 TTD                         | WASP gene t WASP gene therapy          |                     |                      |       |
| WDR5     | 11091 GuideToPharmac antagonist  | 249565911 OICR-9429                    |                     |                      |       |
| WEE1     | 7465 ClarityFoundationClinical   | MK 1775 MK 1775                        |                     |                      |       |
| WIF1     | 11197 PharmGKB                   | Platinum con Platinum compounds        |                     |                      |       |
| WNK1     | 65125 GuideToPharmac inhibitor   | 252827493 PP1                          |                     |                      |       |
| WNK2     | 65268 GuideToPharmac inhibitor   | 249565802 COMPOUND 25 [PMID: 17935989] |                     |                      |       |
| WNK3     | 65267 GuideToPharmac inhibitor   | 249565818 COMPOUND 2C [PMID: 24900538] |                     |                      |       |
| WNT5B    | 81029 PharmGKB                   | Platinum con Platinum compounds        |                     |                      |       |

|         |                                 |                                     |                     |                         |                      |       |
|---------|---------------------------------|-------------------------------------|---------------------|-------------------------|----------------------|-------|
| WNT7A   | 7476 NCI                        | DES                                 | DES                 | DIETHYLSTILBESTROL      | chembl:CHEMBL411     | 4.24  |
| WRN     | 7486 DTC                        | NSC-7387                            | NSC-7387            | CHEMBL119878            | chembl:CHEMBL119878  | 0.11  |
| WT1     | 7490 TTD                        | Combined PFCombined PR1/WT1 vaccine |                     |                         |                      |       |
| WWOX    | 51741 NCI                       | TUMOR NECTUMOR NECROSIS FACTOR      |                     |                         |                      |       |
| XBP1    | 7494 DTC                        | FLUSPIRILE                          | FLUSPIRILENE        | FLUSPIRILENE            | chembl:CHEMBL46516   | 0.15  |
| XCR1    | 2829 GuideToPharmacagonist      | 135651921 XCL2                      |                     |                         |                      |       |
| XDH     | 7498 TTD                        | PMID278410PMID27841045-Compound-156 |                     |                         |                      |       |
| XIAP    | 331 TTD                         | PMID259809PMID25980951-Compound-7   |                     |                         |                      |       |
| XIRP2   | 129446 PharmGKB                 | atenolol                            | atenolol            | ATENOLOL                | chembl:CHEMBL24      | 1.87  |
| XK      | 7504 TTD                        | NPC-1C                              | NPC-1C              | ENSITUXIMAB             | chembl:CHEMBL1743013 | 31.83 |
| XPA     | 7507 PharmGKB                   | Platinum corPlatinum compounds      |                     |                         |                      |       |
| XPC     | 7508 PharmGKB                   | Platinum corPlatinum compounds      |                     |                         |                      |       |
| XPNPEP1 | 7511 ChemblInteractioinhibitor  | CHEMBL21(TOSEDOSTAT                 |                     | TOSEDOSTAT              | chembl:CHEMBL2103847 | 3.35  |
| XPNPEP2 | 7512 ChemblInteractioinhibitor  | CHEMBL21(TOSEDOSTAT                 |                     | TOSEDOSTAT              | chembl:CHEMBL2103847 | 3.35  |
| XPNPEP3 | 63929 ChemblInteractioinhibitor | CHEMBL21(TOSEDOSTAT                 |                     | TOSEDOSTAT              | chembl:CHEMBL2103847 | 3.35  |
| XPO1    | 7514 ChemblInteractioinhibitor  | CHEMBL354SELINEXOR                  |                     | SELINEXOR               | chembl:CHEMBL3545185 | 36.37 |
| XRCC1   | 7515 CIViC                      | CARBOPLA                            | CARBOPLATIN         | CARBOPLATIN             | chembl:CHEMBL1351    | 0.16  |
| XRCC3   | 7517 PharmGKB                   | irinotecan                          | irinotecan          | IRINOTECAN              | chembl:CHEMBL481     | 0.8   |
| XRCC4   | 7518 PharmGKB                   | fluorouracil                        | fluorouracil        | FLUOROURACIL            | chembl:CHEMBL185     | 0.61  |
| XRCC5   | 7520 NCI                        | CAMPTOTH                            | CAMPTOTHECIN        | CAMPTOTHECIN            | chembl:CHEMBL65      | 0.71  |
| XYLT2   | 64132 PharmGKB                  | gemcitabine                         | gemcitabine         | GEMCITABINE             | chembl:CHEMBL888     | 0.79  |
| YEATS4  | 8089 PharmGKB                   | hydrochlorot                        | hydrochlorothiazide | HYDROCHLOROTHIAZIDE     | chembl:CHEMBL435     | 1.77  |
| YES1    | 7525 DTC                        | GSK-625137                          | GSK-625137A         | GSK-625137A             | chembl:CHEMBL230911  | 0.3   |
| YWHAE   | 7531 NCI                        | INSULIN                             | INSULIN             | INSULIN                 | chembl:CHEMBL1201631 | 2.5   |
| YWHAG   | 7532 DTC                        | DAUNORUEDAUNORUBICIN                | HYDROCD             | DAUNORUBICIN HYDROCHLOR | chembl:CHEMBL1563    | 0.96  |
| YY1     | 7528 NCI                        | ANTISERUMANTISERUM                  |                     |                         |                      |       |
| ZACN    | 353174 GuideToPharmacagonist    | 135652738 H+                        |                     |                         |                      |       |
| ZAP70   | 7535 GuideToPharmacinhibitor    | 178102669 SYK INHIBITOR II          |                     |                         |                      |       |
| ZBTB22  | 9278 PharmGKB                   | aspirin                             | aspirin             | ASPIRIN                 | chembl:CHEMBL25      | 0.87  |
| ZDHHC7  | 55625 PharmGKB                  | methylphenid                        | methylphenidate     | METHYLPHENIDATE         | chembl:CHEMBL796     | 2.83  |
| ZEB1    | 6935 CIViC                      | DOXORUBI                            | DOXORUBICIN         | DOXORUBICIN             | chembl:CHEMBL53463   | 0.45  |
| ZFP36L2 | 678 NCI                         | BUTYRATE                            | BUTYRATE            |                         |                      |       |
| ZIC4    | 84107 PharmGKB                  | haloperidol                         | haloperidol         | HALOPERIDOL             | chembl:CHEMBL54      | 1.79  |
| ZMAT4   | 79698 PharmGKB                  | atenolol                            | atenolol            | ATENOLOL                | chembl:CHEMBL24      | 1.87  |
| ZNF100  | 163227 PharmGKB                 | antineoplasticantineoplastic agents |                     |                         |                      |       |
| ZNF134  | 7693 PharmGKB                   | methylphenid                        | methylphenidate     | METHYLPHENIDATE         | chembl:CHEMBL796     | 2.83  |
| ZNF165  | 7718 PharmGKB                   | opioids                             |                     |                         |                      |       |
| ZNF211  | 10520 PharmGKB                  | methylphenid                        | methylphenidate     | METHYLPHENIDATE         | chembl:CHEMBL796     | 2.83  |
| ZNF385D | 79750 PharmGKB                  | duloxetine                          | duloxetine          | DULOXETINE              | chembl:CHEMBL1175    | 9.55  |
| ZNF423  | 23090 PharmGKB                  | tamoxifen                           | tamoxifen           | TAMOXIFEN               | chembl:CHEMBL83      | 1.08  |
| ZNF565  | 147929 PharmGKB                 | methylphenid                        | methylphenidate     | METHYLPHENIDATE         | chembl:CHEMBL796     | 2.83  |
| ZNF568  | 374900 PharmGKB                 | opioids                             |                     |                         |                      |       |

|         |                 |                                                                |              |                    |
|---------|-----------------|----------------------------------------------------------------|--------------|--------------------|
| ZNF697  | 90874 PharmGKB  | interferon betinterferon beta-1a                               |              |                    |
| ZNF804A | 91752 PharmGKB  | antipsychotic:antipsychotics                                   |              |                    |
| ZNF816  | 125893 PharmGKB | Tumor necrosTumor necrosis factor alpha (TNF-alpha) inhibitors |              |                    |
| ZRSR2   | 8233 OncoKB     | H3B-8800 H3B-8800                                              |              |                    |
| ZSCAN25 | 221785 PharmGKB | lumefantrine lumefantrine                                      | LUMEFANTRINE | chembl:CHEMBL38827 |
| ZUP1    | 221302 TTD      | Azepan-4-oncAzepan-4-one derivative 2                          |              | 5.3                |

**Table S2.** The druggable genes from Finan et al.

| <u>Ensembl gene id</u> | <u>gene names</u> |
|------------------------|-------------------|
| ENSG00000000938        | FGR               |
| ENSG00000001626        | CFTR              |
| ENSG00000001630        | CYP51A1           |
| ENSG00000002549        | LAP3              |
| ENSG00000004468        | CD38              |
| ENSG00000004478        | FKBP4             |
| ENSG00000004660        | CAMKK1            |
| ENSG00000004700        | RECQL             |
| ENSG00000004809        | SLC22A16          |
| ENSG00000004846        | ABCB5             |
| ENSG00000004948        | CALCR             |
| ENSG00000005381        | MPO               |
| ENSG00000005421        | PON1              |
| ENSG00000005471        | ABCB4             |
| ENSG00000005844        | ITGAL             |
| ENSG00000005961        | ITGA2B            |
| ENSG00000006071        | ABCC8             |
| ENSG00000006283        | CACNA1G           |
| ENSG00000006327        | TNFRSF12A         |
| ENSG00000006432        | MAP3K9            |
| ENSG00000006638        | TBXA2R            |
| ENSG00000007047        | MARK4             |
| ENSG00000007171        | NOS2              |
| ENSG00000007216        | SLC13A2           |
| ENSG00000007264        | MATK              |
| ENSG00000007312        | CD79B             |
| ENSG00000007314        | SCN4A             |
| ENSG00000007402        | CACNA2D2          |
| ENSG00000007908        | SELE              |
| ENSG00000007933        | FMO3              |
| ENSG00000008018        | PSMB1             |
| ENSG00000008086        | CDKL5             |
| ENSG00000008394        | MGST1             |

|                 |         |
|-----------------|---------|
| ENSG00000010310 | GIPR    |
| ENSG00000010322 | NISCH   |
| ENSG00000010610 | CD4     |
| ENSG00000010671 | BTK     |
| ENSG00000010810 | FYN     |
| ENSG00000010932 | FMO1    |
| ENSG00000011566 | MAP4K3  |
| ENSG00000011677 | GABRA3  |
| ENSG00000012124 | CD22    |
| ENSG00000012504 | NR1H4   |
| ENSG00000012779 | ALOX5   |
| ENSG00000012983 | MAP4K5  |
| ENSG00000013441 | CLK1    |
| ENSG00000013725 | CD6     |
| ENSG00000015413 | DPEP1   |
| ENSG00000015520 | NPC1L1  |
| ENSG00000016490 | CLCA1   |
| ENSG00000016602 | CLCA4   |
| ENSG00000017427 | IGF1    |
| ENSG00000018625 | ATP1A2  |
| ENSG00000019186 | CYP24A1 |
| ENSG00000019582 | CD74    |
| ENSG00000019991 | HGF     |
| ENSG00000021461 | CYP3A43 |
| ENSG00000021826 | CPS1    |
| ENSG00000022355 | GABRA1  |
| ENSG00000023445 | BIRC3   |
| ENSG00000023839 | ABCC2   |
| ENSG00000026025 | VIM     |
| ENSG00000026508 | CD44    |
| ENSG00000026751 | SLAMF7  |
| ENSG00000027075 | PRKCH   |
| ENSG00000027697 | IFNGR1  |
| ENSG00000028116 | VRK2    |
| ENSG00000030304 | MUSK    |
| ENSG00000034152 | MAP2K3  |
| ENSG00000035664 | DAPK2   |
| ENSG00000036530 | CYP46A1 |
| ENSG00000036828 | CASR    |
| ENSG00000037280 | FLT4    |
| ENSG00000041982 | TNC     |
| ENSG00000042088 | TDP1    |

|                 |         |
|-----------------|---------|
| ENSG00000043591 | ADRB1   |
| ENSG00000044524 | EPHA3   |
| ENSG00000047936 | ROS1    |
| ENSG00000048052 | HDAC9   |
| ENSG00000049249 | TNFRSF9 |
| ENSG00000049319 | SRD5A2  |
| ENSG00000050555 | LAMC3   |
| ENSG00000050628 | PTGER3  |
| ENSG00000050748 | MAPK9   |
| ENSG00000051382 | PIK3CB  |
| ENSG00000053747 | LAMA3   |
| ENSG00000053918 | KCNQ1   |
| ENSG00000055118 | KCNH2   |
| ENSG00000057593 | F7      |
| ENSG00000058085 | LAMC2   |
| ENSG00000058404 | CAMK2B  |
| ENSG00000058729 | RIOK2   |
| ENSG00000059377 | TBXAS1  |
| ENSG00000061273 | HDAC7   |
| ENSG00000061918 | GUCY1B3 |
| ENSG00000061938 | TNK2    |
| ENSG00000062038 | CDH3    |
| ENSG00000062524 | LTK     |
| ENSG00000062822 | POLD1   |
| ENSG00000063854 | HAGH    |
| ENSG00000064012 | CASP8   |
| ENSG00000064300 | NGFR    |
| ENSG00000064393 | HIPK2   |
| ENSG00000064547 | LPAR2   |
| ENSG00000064989 | CALCRL  |
| ENSG00000065243 | PKN2    |
| ENSG00000065325 | GLP2R   |
| ENSG00000065361 | ERBB3   |
| ENSG00000065534 | MYLK    |
| ENSG00000065559 | MAP2K4  |
| ENSG00000065613 | SLK     |
| ENSG00000065621 | GSTO2   |
| ENSG00000065675 | PRKCQ   |
| ENSG00000065883 | CDK13   |
| ENSG00000065989 | PDE4A   |
| ENSG00000066056 | TIE1    |
| ENSG00000066230 | SLC9A3  |

|                 |          |
|-----------------|----------|
| ENSG00000066405 | CLDN18   |
| ENSG00000066468 | FGFR2    |
| ENSG00000067182 | TNFRSF1A |
| ENSG00000067225 | PKM      |
| ENSG00000067606 | PRKCZ    |
| ENSG00000067900 | ROCK1    |
| ENSG00000068024 | HDAC4    |
| ENSG00000068078 | FGFR3    |
| ENSG00000069431 | ABCC9    |
| ENSG00000069535 | MAOB     |
| ENSG00000069696 | DRD4     |
| ENSG00000069764 | PLA2G10  |
| ENSG00000070019 | GUCY2C   |
| ENSG00000070748 | CHAT     |
| ENSG00000070808 | CAMK2A   |
| ENSG00000070886 | EPHA8    |
| ENSG00000070915 | SLC12A3  |
| ENSG00000071054 | MAP4K4   |
| ENSG00000071242 | RPS6KA2  |
| ENSG00000072062 | PRKACA   |
| ENSG00000072133 | RPS6KA6  |
| ENSG00000072210 | ALDH3A2  |
| ENSG00000072274 | TFR3     |
| ENSG00000072506 | HSD17B10 |
| ENSG00000072518 | MARK2    |
| ENSG00000072694 | FCGR2B   |
| ENSG00000072786 | STK10    |
| ENSG00000073417 | PDE8A    |
| ENSG00000073734 | ABCB11   |
| ENSG00000073737 | DHRS9    |
| ENSG00000073756 | PTGS2    |
| ENSG00000073803 | MAP3K13  |
| ENSG00000074319 | TSG101   |
| ENSG00000074410 | CA12     |
| ENSG00000074590 | NUAK1    |
| ENSG00000074803 | SLC12A1  |
| ENSG00000074966 | TXK      |
| ENSG00000075043 | KCNQ2    |
| ENSG00000075073 | TACR2    |
| ENSG00000075388 | FGF4     |
| ENSG00000075413 | MARK3    |
| ENSG00000075651 | PLD1     |

|                 |          |
|-----------------|----------|
| ENSG00000076258 | FMO4     |
| ENSG00000076662 | ICAM3    |
| ENSG00000076706 | MCAM     |
| ENSG00000076984 | MAP2K7   |
| ENSG00000077092 | RARB     |
| ENSG00000077097 | TOP2B    |
| ENSG00000077238 | IL4R     |
| ENSG00000077264 | PAK3     |
| ENSG00000077498 | TYR      |
| ENSG00000077782 | FGFR1    |
| ENSG00000078098 | FAP      |
| ENSG00000079277 | MKNK1    |
| ENSG00000079459 | FDFT1    |
| ENSG00000079999 | KEAP1    |
| ENSG00000080224 | EPHA6    |
| ENSG00000080293 | SCTR     |
| ENSG00000080644 | CHRNA3   |
| ENSG00000080815 | PSEN1    |
| ENSG00000080824 | HSP90AA1 |
| ENSG00000081051 | AFP      |
| ENSG00000081237 | PTPRC    |
| ENSG00000081248 | CACNA1S  |
| ENSG00000081320 | STK17B   |
| ENSG00000081800 | SLC13A1  |
| ENSG00000082175 | PGR      |
| ENSG00000082482 | KCNK2    |
| ENSG00000082556 | OPRK1    |
| ENSG00000082701 | GSK3B    |
| ENSG00000082781 | ITGB5    |
| ENSG00000083290 | ULK2     |
| ENSG00000083457 | ITGAE    |
| ENSG00000084207 | GSTP1    |
| ENSG00000084453 | SLCO1A2  |
| ENSG00000084674 | APOB     |
| ENSG00000085511 | MAP3K4   |
| ENSG00000085563 | ABCB1    |
| ENSG00000085662 | AKR1B1   |
| ENSG00000085871 | MGST2    |
| ENSG00000086205 | FOLH1    |
| ENSG00000086548 | CEACAM6  |
| ENSG00000087076 | HSD17B14 |
| ENSG00000087085 | ACHE     |

|                 |          |
|-----------------|----------|
| ENSG00000087237 | CETP     |
| ENSG00000087245 | MMP2     |
| ENSG00000087494 | PTHLH    |
| ENSG00000087586 | AURKA    |
| ENSG00000088002 | SULT2B1  |
| ENSG00000088386 | SLC15A1  |
| ENSG00000088832 | FKBP1A   |
| ENSG00000089250 | NOS1     |
| ENSG00000089597 | GANAB    |
| ENSG00000090020 | SLC9A1   |
| ENSG00000090339 | ICAM1    |
| ENSG00000090376 | IRAK3    |
| ENSG00000090402 | SI       |
| ENSG00000090534 | THPO     |
| ENSG00000091128 | LAMB4    |
| ENSG00000091136 | LAMB1    |
| ENSG00000091181 | IL5RA    |
| ENSG00000091262 | ABCC6    |
| ENSG00000091436 |          |
| ENSG00000091831 | ESR1     |
| ENSG00000091879 | ANGPT2   |
| ENSG00000091972 | CD200    |
| ENSG00000092009 | CMA1     |
| ENSG00000092054 | MYH7     |
| ENSG00000092068 | SLC7A8   |
| ENSG00000092096 | SLC22A17 |
| ENSG00000092445 | TYRO3    |
| ENSG00000092969 | TGFB2    |
| ENSG00000093010 | COMT     |
| ENSG00000094631 | HDAC6    |
| ENSG00000094963 | FMO2     |
| ENSG00000095303 | PTGS1    |
| ENSG00000095464 | PDE6C    |
| ENSG00000095596 | CYP26A1  |
| ENSG00000096060 | FKBP5    |
| ENSG00000096063 | SRPK1    |
| ENSG00000096384 | HSP90AB1 |
| ENSG00000096717 | SIRT1    |
| ENSG00000096968 | JAK2     |
| ENSG00000096996 | IL12RB1  |
| ENSG00000097007 | ABL1     |
| ENSG00000099250 | NRP1     |

|                 |         |
|-----------------|---------|
| ENSG00000099866 | MADCAM1 |
| ENSG00000099875 | MKNK2   |
| ENSG00000100030 | MAPK1   |
| ENSG00000100170 | SLC5A1  |
| ENSG00000100191 | SLC5A4  |
| ENSG00000100197 | CYP2D6  |
| ENSG00000100243 | CYB5R3  |
| ENSG00000100299 | ARSA    |
| ENSG00000100346 | CACNA1I |
| ENSG00000100385 | IL2RB   |
| ENSG00000100429 | HDAC10  |
| ENSG00000100433 | KCNK10  |
| ENSG00000100577 | GSTZ1   |
| ENSG00000100612 | DHRS7   |
| ENSG00000100644 | HIF1A   |
| ENSG00000100652 | SLC10A1 |
| ENSG00000100739 | BDKRB1  |
| ENSG00000100784 | RPS6KA5 |
| ENSG00000100804 | PSMB5   |
| ENSG00000100823 | APEX1   |
| ENSG00000100867 | DHRS2   |
| ENSG00000100983 | GSS     |
| ENSG00000100985 | MMP9    |
| ENSG00000100997 | ABHD12  |
| ENSG00000101017 | CD40    |
| ENSG00000101076 | HNF4A   |
| ENSG00000101109 | STK4    |
| ENSG00000101162 | TUBB1   |
| ENSG00000101180 | HRH3    |
| ENSG00000101187 | SLCO4A1 |
| ENSG00000101188 | NTSR1   |
| ENSG00000101204 | CHRNA4  |
| ENSG00000101213 | PTK6    |
| ENSG00000101266 | CSNK2A1 |
| ENSG00000101306 | MYLK2   |
| ENSG00000101336 | HCK     |
| ENSG00000101349 | PAK7    |
| ENSG00000101680 | LAMA1   |
| ENSG00000101782 | RIOK3   |
| ENSG00000101846 | STS     |
| ENSG00000101868 | POLA1   |
| ENSG00000101966 | XIAP    |

|                 |           |
|-----------------|-----------|
| ENSG00000102001 | CACNA1F   |
| ENSG00000102010 | BMX       |
| ENSG00000102096 | PIM2      |
| ENSG00000102225 | CDK16     |
| ENSG00000102245 | CD40LG    |
| ENSG00000102312 | PORCN     |
| ENSG00000102393 | GLA       |
| ENSG00000102468 | HTR2A     |
| ENSG00000102524 | TNFSF13B  |
| ENSG00000102539 | MLNR      |
| ENSG00000102572 | STK24     |
| ENSG00000102755 | FLT1      |
| ENSG00000102796 | DHRS12    |
| ENSG00000102854 | MSLN      |
| ENSG00000102882 | MAPK3     |
| ENSG00000102967 | DHODH     |
| ENSG00000102996 | MMP15     |
| ENSG00000103222 | ABCC1     |
| ENSG00000103257 | SLC7A5    |
| ENSG00000103546 | SLC6A2    |
| ENSG00000103642 | LACTB     |
| ENSG00000103653 | CSK       |
| ENSG00000103855 | CD276     |
| ENSG00000104205 | SGK3      |
| ENSG00000104267 | CA2       |
| ENSG00000104312 | RIPK2     |
| ENSG00000104321 | TRPA1     |
| ENSG00000104365 | IKBKB     |
| ENSG00000104368 | PLAT      |
| ENSG00000104375 | STK3      |
| ENSG00000104549 | SQLE      |
| ENSG00000104687 | GSR       |
| ENSG00000104689 | TNFRSF10A |
| ENSG00000104774 | MAN2B1    |
| ENSG00000104783 | KCNN4     |
| ENSG00000104814 | MAP4K1    |
| ENSG00000104833 | TUBB4A    |
| ENSG00000104894 | CD37      |
| ENSG00000104921 | FCER2     |
| ENSG00000104936 | DMPK      |
| ENSG00000105146 | AURKC     |
| ENSG00000105173 | CCNE1     |

|                 |         |
|-----------------|---------|
| ENSG00000105204 | DYRK1B  |
| ENSG00000105221 | AKT2    |
| ENSG00000105287 | PRKD2   |
| ENSG00000105329 | TGFB1   |
| ENSG00000105383 | CD33    |
| ENSG00000105388 | CEACAM5 |
| ENSG00000105397 | TYK2    |
| ENSG00000105398 | SULT2A1 |
| ENSG00000105409 | ATP1A3  |
| ENSG00000105464 | GRIN2D  |
| ENSG00000105613 | MAST1   |
| ENSG00000105639 | JAK3    |
| ENSG00000105650 | PDE4C   |
| ENSG00000105675 | ATP4A   |
| ENSG00000105695 | MAG     |
| ENSG00000105697 | HAMP    |
| ENSG00000105723 | GSK3A   |
| ENSG00000105737 | GRIK5   |
| ENSG00000105810 | CDK6    |
| ENSG00000105851 | PIK3CG  |
| ENSG00000105852 | PON3    |
| ENSG00000105854 | PON2    |
| ENSG00000105976 | MET     |
| ENSG00000106123 | EPHB6   |
| ENSG00000106128 | GHRHR   |
| ENSG00000106211 | HSPB1   |
| ENSG00000106258 | CYP3A5  |
| ENSG00000106348 | IMPDH1  |
| ENSG00000106546 | AHR     |
| ENSG00000106688 | SLC1A1  |
| ENSG00000106799 | TGFBR1  |
| ENSG00000106804 | C5      |
| ENSG00000106991 | ENG     |
| ENSG00000107140 | TESK1   |
| ENSG00000107159 | CA9     |
| ENSG00000107165 | TYRP1   |
| ENSG00000107643 | MAPK8   |
| ENSG00000107854 | TNKS2   |
| ENSG00000107984 | DKK1    |
| ENSG00000108242 | CYP2C18 |
| ENSG00000108405 | P2RX1   |
| ENSG00000108443 | RPS6KB1 |

|                 |          |
|-----------------|----------|
| ENSG00000108556 | CHRNE    |
| ENSG00000108576 | SLC6A4   |
| ENSG00000108602 | ALDH3A1  |
| ENSG00000108691 | CCL2     |
| ENSG00000108786 | HSD17B1  |
| ENSG00000108840 | HDAC5    |
| ENSG00000108846 | ABCC3    |
| ENSG00000108984 | MAP2K6   |
| ENSG00000109016 | DHRS7B   |
| ENSG00000109099 | PMP22    |
| ENSG00000109158 | GABRA4   |
| ENSG00000109163 | GNRHR    |
| ENSG00000109181 | UGT2B10  |
| ENSG00000109193 | SULT1E1  |
| ENSG00000109320 | NFKB1    |
| ENSG00000109339 | MAPK10   |
| ENSG00000109471 | IL2      |
| ENSG00000109610 | SOD3     |
| ENSG00000110063 | DCPS     |
| ENSG00000110092 | CCND1    |
| ENSG00000110148 | CCKBR    |
| ENSG00000110195 | FOLR1    |
| ENSG00000110330 | BIRC2    |
| ENSG00000110422 | HIPK3    |
| ENSG00000110448 | CD5      |
| ENSG00000110628 | SLC22A18 |
| ENSG00000110680 | CALCA    |
| ENSG00000110799 | VWF      |
| ENSG00000110931 | CAMKK2   |
| ENSG00000110944 | IL23A    |
| ENSG00000111012 | CYP27B1  |
| ENSG00000111057 | KRT18    |
| ENSG00000111142 | METAP2   |
| ENSG00000111144 | LTA4H    |
| ENSG00000111275 | ALDH2    |
| ENSG00000111319 | SCNN1A   |
| ENSG00000111321 | LTBR     |
| ENSG00000111424 | VDR      |
| ENSG00000111537 | IFNG     |
| ENSG00000111700 | SLCO1B3  |
| ENSG00000111816 | FRK      |
| ENSG00000111837 | MAK      |

|                 |         |
|-----------------|---------|
| ENSG00000112033 | PPARD   |
| ENSG00000112038 | OPRM1   |
| ENSG00000112062 | MAPK14  |
| ENSG00000112096 | SOD2    |
| ENSG00000112115 | IL17A   |
| ENSG00000112116 | IL17F   |
| ENSG00000112144 | ICK     |
| ENSG00000112164 | GLP1R   |
| ENSG00000112294 | ALDH5A1 |
| ENSG00000112312 | GMNN    |
| ENSG00000112499 | SLC22A2 |
| ENSG00000112541 | PDE10A  |
| ENSG00000112576 | CCND3   |
| ENSG00000112715 | VEGFA   |
| ENSG00000112739 | PRPF4B  |
| ENSG00000112742 | TTK     |
| ENSG00000112759 | SLC29A1 |
| ENSG00000112769 | LAMA4   |
| ENSG00000112964 | GHR     |
| ENSG00000113070 | HBEGF   |
| ENSG00000113161 | HMGCR   |
| ENSG00000113231 | PDE8B   |
| ENSG00000113240 | CLK4    |
| ENSG00000113263 | ITK     |
| ENSG00000113302 | IL12B   |
| ENSG00000113327 | GABRG2  |
| ENSG00000113448 | PDE4D   |
| ENSG00000113494 | PRLR    |
| ENSG00000113520 | IL4     |
| ENSG00000113525 | IL5     |
| ENSG00000113578 | FGF1    |
| ENSG00000113580 | NR3C1   |
| ENSG00000113712 | CSNK1A1 |
| ENSG00000113721 | PDGFRB  |
| ENSG00000113749 | HRH2    |
| ENSG00000114013 | CD86    |
| ENSG00000114124 | GRK7    |
| ENSG00000114200 | BCHE    |
| ENSG00000114770 | ABCC5   |
| ENSG00000114859 | CLCN2   |
| ENSG00000115008 | IL1A    |
| ENSG00000115085 | ZAP70   |

|                 |          |
|-----------------|----------|
| ENSG00000115159 | GPD2     |
| ENSG00000115170 | ACVR1    |
| ENSG00000115221 | ITGB6    |
| ENSG00000115232 | ITGA4    |
| ENSG00000115310 | RTN4     |
| ENSG00000115353 | TACR1    |
| ENSG00000115414 | FN1      |
| ENSG00000115486 | GGCX     |
| ENSG00000115526 | CHST10   |
| ENSG00000115590 | IL1R2    |
| ENSG00000115594 | IL1R1    |
| ENSG00000115657 | ABCB6    |
| ENSG00000115661 | STK16    |
| ENSG00000115694 | STK25    |
| ENSG00000115705 | TPO      |
| ENSG00000115758 | ODC1     |
| ENSG00000115825 | PRKD3    |
| ENSG00000115884 | SDC1     |
| ENSG00000115977 | AAK1     |
| ENSG00000116032 | GRIN3B   |
| ENSG00000116106 | EPHA4    |
| ENSG00000116141 | MARK1    |
| ENSG00000116157 | GPX7     |
| ENSG00000116329 | OPRD1    |
| ENSG00000116478 | HDAC1    |
| ENSG00000116711 | PLA2G4A  |
| ENSG00000116783 | TNNI3K   |
| ENSG00000116824 | CD2      |
| ENSG00000117013 | KCNQ4    |
| ENSG00000117020 | AKT3     |
| ENSG00000117215 | PLA2G2D  |
| ENSG00000117362 | APH1A    |
| ENSG00000117400 | MPL      |
| ENSG00000117448 | AKR1A1   |
| ENSG00000117480 | FAAH     |
| ENSG00000117507 | FMO6P    |
| ENSG00000117525 | F3       |
| ENSG00000117586 | TNFSF4   |
| ENSG00000117594 | HSD11B1  |
| ENSG00000117601 | SERPINC1 |
| ENSG00000117650 | NEK2     |
| ENSG00000117676 | RPS6KA1  |

|                 |           |
|-----------------|-----------|
| ENSG00000117971 | CHRN4     |
| ENSG00000117984 | CTSD      |
| ENSG00000118046 | STK11     |
| ENSG00000118058 | KMT2A     |
| ENSG00000118113 | MMP8      |
| ENSG00000118271 | TTR       |
| ENSG00000118298 | CA14      |
| ENSG00000118432 | CNR1      |
| ENSG00000118514 | ALDH8A1   |
| ENSG00000118523 | CTGF      |
| ENSG00000118777 | ABCG2     |
| ENSG00000118785 | SPP1      |
| ENSG00000118971 | CCND2     |
| ENSG00000119004 | CYP20A1   |
| ENSG00000119535 | CSF3R     |
| ENSG00000119630 | PGF       |
| ENSG00000119699 | TGFB3     |
| ENSG00000119711 | ALDH6A1   |
| ENSG00000119715 | ESRRB     |
| ENSG00000119772 | DNMT3A    |
| ENSG00000119782 | FKBP1B    |
| ENSG00000119888 | EPCAM     |
| ENSG00000120088 | CRHR1     |
| ENSG00000120156 | TEK       |
| ENSG00000120217 | CD274     |
| ENSG00000120235 | IFNA6     |
| ENSG00000120242 | IFNA8     |
| ENSG00000120251 | GRIA2     |
| ENSG00000120659 | TNFSF11   |
| ENSG00000120889 | TNFRSF10B |
| ENSG00000120899 | PTK2B     |
| ENSG00000120903 | CHRNA2    |
| ENSG00000120907 | ADRA1A    |
| ENSG00000120915 | EPHX2     |
| ENSG00000120949 | TNFRSF8   |
| ENSG00000121270 | ABCC11    |
| ENSG00000121351 | IAPP      |
| ENSG00000121361 | KCNJ8     |
| ENSG00000121594 | CD80      |
| ENSG00000121691 | CAT       |
| ENSG00000121764 | HCRTR1    |
| ENSG00000121807 | CCR2      |

|                 |          |
|-----------------|----------|
| ENSG00000121853 | GHSR     |
| ENSG00000121879 | PIK3CA   |
| ENSG00000121933 | ADORA3   |
| ENSG00000121966 | CXCR4    |
| ENSG00000122025 | FLT3     |
| ENSG00000122194 | PLG      |
| ENSG00000122420 | PTGFR    |
| ENSG00000122641 | INHBA    |
| ENSG00000122863 | CHST3    |
| ENSG00000122966 | CIT      |
| ENSG00000123143 | PKN1     |
| ENSG00000123179 | EBPL     |
| ENSG00000123191 | ATP7B    |
| ENSG00000123201 | GUCY1B2  |
| ENSG00000123374 | CDK2     |
| ENSG00000123505 | AMD1     |
| ENSG00000123561 | SERPINA7 |
| ENSG00000123595 | RAB9A    |
| ENSG00000124089 | MC3R     |
| ENSG00000124302 | CHST8    |
| ENSG00000124574 | ABCC10   |
| ENSG00000124588 | NQO2     |
| ENSG00000124610 | HIST1H1A |
| ENSG00000124784 | RIOK1    |
| ENSG00000124882 | EREG     |
| ENSG00000125255 | SLC10A2  |
| ENSG00000125257 | ABCC4    |
| ENSG00000125384 | PTGER2   |
| ENSG00000125388 | GRK4     |
| ENSG00000125498 | KIR2DL1  |
| ENSG00000125508 | SRMS     |
| ENSG00000125510 | OPRL1    |
| ENSG00000125538 | IL1B     |
| ENSG00000125551 | PLGLB2   |
| ENSG00000125675 | GRIA3    |
| ENSG00000125726 | CD70     |
| ENSG00000125735 | TNFSF14  |
| ENSG00000125834 | STK35    |
| ENSG00000125910 | S1PR4    |
| ENSG00000126067 | PSMB2    |
| ENSG00000126218 | F10      |
| ENSG00000126266 | FFAR1    |

|                 |         |
|-----------------|---------|
| ENSG00000126351 | THRA    |
| ENSG00000126583 | PRKCG   |
| ENSG00000126895 | AVPR2   |
| ENSG00000126934 | MAP2K2  |
| ENSG00000127318 | IL22    |
| ENSG00000127334 | DYRK2   |
| ENSG00000127554 | GFER    |
| ENSG00000127948 | POR     |
| ENSG00000128039 | SRD5A3  |
| ENSG00000128052 | KDR     |
| ENSG00000128059 | PPAT    |
| ENSG00000128271 | ADORA2A |
| ENSG00000128602 | SMO     |
| ENSG00000128655 | PDE11A  |
| ENSG00000128829 | EIF2AK4 |
| ENSG00000128917 | DLL4    |
| ENSG00000128918 | ALDH1A2 |
| ENSG00000129214 | SHBG    |
| ENSG00000129315 | CCNT1   |
| ENSG00000129484 | PARP2   |
| ENSG00000129521 | EGLN3   |
| ENSG00000130304 | SLC27A1 |
| ENSG00000130413 | STK33   |
| ENSG00000130540 | SULT4A1 |
| ENSG00000130649 | CYP2E1  |
| ENSG00000130669 | PAK4    |
| ENSG00000130702 | LAMA5   |
| ENSG00000130758 | MAP3K10 |
| ENSG00000130816 | DNMT1   |
| ENSG00000131023 | LATS1   |
| ENSG00000131269 | ABCB7   |
| ENSG00000131389 | SLC6A6  |
| ENSG00000131471 | AOC3    |
| ENSG00000131686 | CA6     |
| ENSG00000131747 | TOP2A   |
| ENSG00000131759 | RARA    |
| ENSG00000131781 | FMO5    |
| ENSG00000132155 | RAF1    |
| ENSG00000132170 | PPARG   |
| ENSG00000132329 | RAMP1   |
| ENSG00000132356 | PRKAA1  |
| ENSG00000132437 | DDC     |

|                 |         |
|-----------------|---------|
| ENSG00000132639 | SNAP25  |
| ENSG00000132671 | SSTR4   |
| ENSG00000132681 | ATP1A4  |
| ENSG00000132746 | ALDH3B2 |
| ENSG00000132964 | CDK8    |
| ENSG00000132965 | ALOX5AP |
| ENSG00000133019 | CHRM3   |
| ENSG00000133059 | DSTYK   |
| ENSG00000133083 | DCLK1   |
| ENSG00000133101 | CCNA1   |
| ENSG00000133216 | EPHB2   |
| ENSG00000133433 | GSTT2B  |
| ENSG00000133731 | IMPA1   |
| ENSG00000133742 | CA1     |
| ENSG00000134057 | CCNB1   |
| ENSG00000134058 | CDK7    |
| ENSG00000134184 | GSTM1   |
| ENSG00000134201 | GSTM5   |
| ENSG00000134202 | GSTM3   |
| ENSG00000134259 | NGF     |
| ENSG00000134318 | ROCK2   |
| ENSG00000134352 | IL6ST   |
| ENSG00000134460 | IL2RA   |
| ENSG00000134489 | HRH4    |
| ENSG00000134538 | SLCO1B1 |
| ENSG00000134602 |         |
| ENSG00000134640 | MTNR1B  |
| ENSG00000134716 | CYP2J2  |
| ENSG00000134780 | DAGLA   |
| ENSG00000134853 | PDGFRA  |
| ENSG00000135047 | CTSL    |
| ENSG00000135090 | TAOK3   |
| ENSG00000135226 | UGT2B28 |
| ENSG00000135250 | SRPK2   |
| ENSG00000135312 | HTR1B   |
| ENSG00000135318 | NT5E    |
| ENSG00000135333 | EPHA7   |
| ENSG00000135341 | MAP3K7  |
| ENSG00000135446 | CDK4    |
| ENSG00000135503 | ACVR1B  |
| ENSG00000135605 | TEC     |
| ENSG00000135679 | MDM2    |

|                 |         |
|-----------------|---------|
| ENSG00000135702 | CHST5   |
| ENSG00000135766 | EGLN1   |
| ENSG00000135821 | GLUL    |
| ENSG00000135862 | LAMC1   |
| ENSG00000135902 | CHRND   |
| ENSG00000135914 | HTR2B   |
| ENSG00000135929 | CYP27A1 |
| ENSG00000136160 | EDNRB   |
| ENSG00000136213 | CHST12  |
| ENSG00000136235 | GPNMB   |
| ENSG00000136244 | IL6     |
| ENSG00000136531 | SCN2A   |
| ENSG00000136546 | SCN7A   |
| ENSG00000136573 | BLK     |
| ENSG00000136634 | IL10    |
| ENSG00000136807 | CDK9    |
| ENSG00000136875 | PRPF4   |
| ENSG00000136928 | GABBR2  |
| ENSG00000136943 | CTSV    |
| ENSG00000137070 | IL11RA  |
| ENSG00000137124 | ALDH1B1 |
| ENSG00000137193 | PIM1    |
| ENSG00000137204 | SLC22A7 |
| ENSG00000137252 | HCRTR2  |
| ENSG00000137267 | TUBB2A  |
| ENSG00000137275 | RIPK1   |
| ENSG00000137285 | TUBB2B  |
| ENSG00000137364 | TPMT    |
| ENSG00000137491 | SLCO2B1 |
| ENSG00000137509 | PRCP    |
| ENSG00000137571 | SLCO5A1 |
| ENSG00000137573 | SULF1   |
| ENSG00000137673 | MMP7    |
| ENSG00000137745 | MMP13   |
| ENSG00000137752 | CASP1   |
| ENSG00000137764 | MAP2K5  |
| ENSG00000137843 | PAK6    |
| ENSG00000137845 | ADAM10  |
| ENSG00000137860 | SLC28A2 |
| ENSG00000137869 | CYP19A1 |
| ENSG00000137975 | CLCA2   |
| ENSG00000138039 | LHCGR   |

|                 |         |
|-----------------|---------|
| ENSG00000138061 | CYP1B1  |
| ENSG00000138074 | SLC5A6  |
| ENSG00000138109 | CYP2C9  |
| ENSG00000138115 | CYP2C8  |
| ENSG00000138160 | KIF11   |
| ENSG00000138356 | AOX1    |
| ENSG00000138379 | MSTN    |
| ENSG00000138435 | CHRNA1  |
| ENSG00000138448 | ITGAV   |
| ENSG00000138449 | SLC40A1 |
| ENSG00000138613 | APH1B   |
| ENSG00000138669 | PRKG2   |
| ENSG00000138685 | FGF2    |
| ENSG00000138696 | BMPR1B  |
| ENSG00000138735 | PDE5A   |
| ENSG00000138756 | BMP2K   |
| ENSG00000138769 | CDKL2   |
| ENSG00000138780 | GSTCD   |
| ENSG00000138814 | PPP3CA  |
| ENSG00000138823 | MTTP    |
| ENSG00000139155 | SLCO1C1 |
| ENSG00000139567 | ACVRL1  |
| ENSG00000139610 | CELA1   |
| ENSG00000139625 | MAP3K12 |
| ENSG00000139626 | ITGB7   |
| ENSG00000139874 | SSTR1   |
| ENSG00000140009 | ESR2    |
| ENSG00000140443 | IGF1R   |
| ENSG00000140459 | CYP11A1 |
| ENSG00000140465 | CYP1A1  |
| ENSG00000140474 | ULK3    |
| ENSG00000140505 | CYP1A2  |
| ENSG00000140538 | NTRK3   |
| ENSG00000140675 | SLC5A2  |
| ENSG00000140795 | MYLK3   |
| ENSG00000140798 | ABCC12  |
| ENSG00000140835 | CHST4   |
| ENSG00000140992 | PDPK1   |
| ENSG00000141458 | NPC1    |
| ENSG00000141503 | MINK1   |
| ENSG00000141510 | TP53    |
| ENSG00000141551 | CSNK1D  |

|                 |          |
|-----------------|----------|
| ENSG00000141720 | PIP4K2B  |
| ENSG00000141736 | ERBB2    |
| ENSG00000141744 | PNMT     |
| ENSG00000142002 | DPP9     |
| ENSG00000142166 | IFNAR1   |
| ENSG00000142168 | SOD1     |
| ENSG00000142178 | SIK1     |
| ENSG00000142192 | APP      |
| ENSG00000142208 | AKT1     |
| ENSG00000142319 | SLC6A3   |
| ENSG00000142494 | SLC47A1  |
| ENSG00000142583 | SLC2A5   |
| ENSG00000142627 | EPHA2    |
| ENSG00000142731 | PLK4     |
| ENSG00000142973 | CYP4B1   |
| ENSG00000143149 | ALDH9A1  |
| ENSG00000143167 | GPA33    |
| ENSG00000143171 | RXRG     |
| ENSG00000143198 | MGST3    |
| ENSG00000143217 | PVRL4    |
| ENSG00000143257 | NR1I3    |
| ENSG00000143322 | ABL2     |
| ENSG00000143365 | RORC     |
| ENSG00000143387 | CTSK     |
| ENSG00000143398 | PIP5K1A  |
| ENSG00000143437 | ARNT     |
| ENSG00000143466 | IKBKE    |
| ENSG00000143498 | TAF1A    |
| ENSG00000143799 | PARP1    |
| ENSG00000143801 | PSEN2    |
| ENSG00000143819 | EPHX1    |
| ENSG00000143839 | REN      |
| ENSG00000143851 | PTPN7    |
| ENSG00000144230 | GPR17    |
| ENSG00000144285 | SCN1A    |
| ENSG00000144481 | TRPM8    |
| ENSG00000144671 | SLC22A14 |
| ENSG00000144852 | NR1I2    |
| ENSG00000144891 | AGTR1    |
| ENSG00000145242 | EPHA5    |
| ENSG00000145321 | GC       |
| ENSG00000145349 | CAMK2D   |

|                 |         |
|-----------------|---------|
| ENSG00000145386 | CCNA2   |
| ENSG00000145545 | SRD5A1  |
| ENSG00000145777 | TSLP    |
| ENSG00000145839 | IL9     |
| ENSG00000145863 | GABRA6  |
| ENSG00000145864 | GABRB2  |
| ENSG00000145888 | GLRA1   |
| ENSG00000145949 | MYLK4   |
| ENSG00000146070 | PLA2G7  |
| ENSG00000146233 | CYP39A1 |
| ENSG00000146242 | TPBG    |
| ENSG00000146399 | TAAR1   |
| ENSG00000146477 | SLC22A3 |
| ENSG00000146648 | EGFR    |
| ENSG00000146872 | TLK2    |
| ENSG00000146904 | EPHA1   |
| ENSG00000147082 | CCNB3   |
| ENSG00000147099 | HDAC8   |
| ENSG00000147119 | CHST7   |
| ENSG00000147155 | EBP     |
| ENSG00000147246 | HTR2C   |
| ENSG00000147257 | GPC3    |
| ENSG00000147576 | ADHFE1  |
| ENSG00000147873 | IFNA5   |
| ENSG00000147955 | SIGMAR1 |
| ENSG00000148053 | NTRK2   |
| ENSG00000148154 | UGCG    |
| ENSG00000148344 | PTGES   |
| ENSG00000148400 | NOTCH1  |
| ENSG00000148408 | CACNA1B |
| ENSG00000148660 | CAMK2G  |
| ENSG00000148680 | HTR7    |
| ENSG00000148795 | CYP17A1 |
| ENSG00000148834 | GSTO1   |
| ENSG00000148848 | ADAM12  |
| ENSG00000149269 | PAK1    |
| ENSG00000149294 | NCAM1   |
| ENSG00000149295 | DRD2    |
| ENSG00000149305 | HTR3B   |
| ENSG00000149403 | GRIK4   |
| ENSG00000149452 | SLC22A8 |
| ENSG00000149554 | CHEK1   |

|                 |          |
|-----------------|----------|
| ENSG00000149742 | SLC22A9  |
| ENSG00000149968 | MMP3     |
| ENSG00000150093 | ITGB1    |
| ENSG00000150337 | FCGR1A   |
| ENSG00000150457 | LATS2    |
| ENSG00000150540 | HNMT     |
| ENSG00000150593 | PDCD4    |
| ENSG00000150594 | ADRA2A   |
| ENSG00000150782 | IL18     |
| ENSG00000151067 | CACNA1C  |
| ENSG00000151090 | THRB     |
| ENSG00000151224 | MAT1A    |
| ENSG00000151247 | EIF4E    |
| ENSG00000151422 | FER      |
| ENSG00000151577 | DRD3     |
| ENSG00000151617 | EDNRA    |
| ENSG00000151623 | NR3C2    |
| ENSG00000151665 | PIGF     |
| ENSG00000151694 | ADAM17   |
| ENSG00000151834 | GABRA2   |
| ENSG00000152270 | PDE3B    |
| ENSG00000152578 | GRIA4    |
| ENSG00000152601 | MBNL1    |
| ENSG00000152822 | GRM1     |
| ENSG00000153208 | MERTK    |
| ENSG00000153253 | SCN3A    |
| ENSG00000153923 | CLCA3P   |
| ENSG00000153956 | CACNA2D1 |
| ENSG00000154080 | CHST9    |
| ENSG00000154188 | ANGPT1   |
| ENSG00000154229 | PRKCA    |
| ENSG00000154310 | TNIK     |
| ENSG00000154928 | EPHB1    |
| ENSG00000155111 | CDK19    |
| ENSG00000155380 | SLC16A1  |
| ENSG00000155465 | SLC7A7   |
| ENSG00000155511 | GRIA1    |
| ENSG00000156006 | NAT2     |
| ENSG00000156096 | UGT2B4   |
| ENSG00000156103 | MMP16    |
| ENSG00000156222 | SLC28A1  |
| ENSG00000156427 | FGF18    |

|                 |           |
|-----------------|-----------|
| ENSG00000156711 | MAPK13    |
| ENSG00000156738 | MS4A1     |
| ENSG00000156873 | PHKG2     |
| ENSG00000157005 | SST       |
| ENSG00000157017 | GHRL      |
| ENSG00000157103 | SLC6A1    |
| ENSG00000157219 | HTR5A     |
| ENSG00000157227 | MMP14     |
| ENSG00000157326 | DHRS4     |
| ENSG00000157379 | DHRS1     |
| ENSG00000157388 | CACNA1D   |
| ENSG00000157404 | KIT       |
| ENSG00000157456 | CCNB2     |
| ENSG00000157540 | DYRK1A    |
| ENSG00000157764 | BRAF      |
| ENSG00000157765 | SLC34A2   |
| ENSG00000158104 | HPD       |
| ENSG00000158125 | XDH       |
| ENSG00000158296 | SLC13A3   |
| ENSG00000158748 | HTR6      |
| ENSG00000158825 | CDA       |
| ENSG00000159110 | IFNAR2    |
| ENSG00000159128 | IFNGR2    |
| ENSG00000159131 | GART      |
| ENSG00000159164 | SV2A      |
| ENSG00000159228 | CBR1      |
| ENSG00000159231 | CBR3      |
| ENSG00000159423 | ALDH4A1   |
| ENSG00000159640 | ACE       |
| ENSG00000159958 | TNFRSF13C |
| ENSG00000160013 | PTGIR     |
| ENSG00000160179 | ABCG1     |
| ENSG00000160223 | ICOSLG    |
| ENSG00000160255 | ITGB2     |
| ENSG00000160396 | HIPK4     |
| ENSG00000160469 | BRSK1     |
| ENSG00000160551 | TAOK1     |
| ENSG00000160584 | SIK3      |
| ENSG00000160683 | CXCR5     |
| ENSG00000160712 | IL6R      |
| ENSG00000160716 | CHRNA2    |
| ENSG00000160752 | FDPS      |

|                 |          |
|-----------------|----------|
| ENSG00000160789 | LMNA     |
| ENSG00000160791 | CCR5     |
| ENSG00000160801 | PTH1R    |
| ENSG00000160867 | FGFR4    |
| ENSG00000160868 | CYP3A4   |
| ENSG00000160870 | CYP3A7   |
| ENSG00000160882 | CYP11B1  |
| ENSG00000160951 | PTGER1   |
| ENSG00000161509 | GRIN2C   |
| ENSG00000161638 | ITGA5    |
| ENSG00000161905 | ALOX15   |
| ENSG00000162009 | SSTR5    |
| ENSG00000162302 | RPS6KA4  |
| ENSG00000162409 | PRKAA2   |
| ENSG00000162434 | JAK1     |
| ENSG00000162496 | DHRS3    |
| ENSG00000162733 | DDR2     |
| ENSG00000162736 | NCSTN    |
| ENSG00000163131 | CTSS     |
| ENSG00000163235 | TGFA     |
| ENSG00000163285 | GABRG1   |
| ENSG00000163288 | GABRB1   |
| ENSG00000163349 | HIPK1    |
| ENSG00000163393 | SLC22A15 |
| ENSG00000163394 | CCKAR    |
| ENSG00000163399 | ATP1A1   |
| ENSG00000163406 | SLC15A2  |
| ENSG00000163464 | CXCR1    |
| ENSG00000163485 | ADORA1   |
| ENSG00000163513 | TGFBR2   |
| ENSG00000163517 | HDAC11   |
| ENSG00000163545 | NUAK2    |
| ENSG00000163558 | PRKCI    |
| ENSG00000163586 | FABP1    |
| ENSG00000163599 | CTLA4    |
| ENSG00000163600 | ICOS     |
| ENSG00000163673 | DCLK3    |
| ENSG00000163823 | CCR1     |
| ENSG00000163873 | GRIK3    |
| ENSG00000163932 | PRKCD    |
| ENSG00000164024 | METAP1   |
| ENSG00000164078 | MST1R    |

|                 |         |
|-----------------|---------|
| ENSG00000164082 | GRM2    |
| ENSG00000164129 | NPY5R   |
| ENSG00000164136 | IL15    |
| ENSG00000164171 | ITGA2   |
| ENSG00000164270 | HTR4    |
| ENSG00000164344 | KLKB1   |
| ENSG00000164400 | CSF2    |
| ENSG00000164418 | GRIK2   |
| ENSG00000164535 | DAGLB   |
| ENSG00000164543 | STK17A  |
| ENSG00000164647 | STEAP1  |
| ENSG00000164690 | SHH     |
| ENSG00000164733 | CTSB    |
| ENSG00000164742 | ADCY1   |
| ENSG00000164776 | PHKG1   |
| ENSG00000164850 | GPER1   |
| ENSG00000164867 | NOS3    |
| ENSG00000164879 | CA3     |
| ENSG00000164885 | CDK5    |
| ENSG00000164904 | ALDH7A1 |
| ENSG00000165025 | SYK     |
| ENSG00000165029 | ABCA1   |
| ENSG00000165092 | ALDH1A1 |
| ENSG00000165240 | ATP7A   |
| ENSG00000165304 | MELK    |
| ENSG00000165409 | TSHR    |
| ENSG00000165646 | SLC18A2 |
| ENSG00000165731 | RET     |
| ENSG00000165841 | CYP2C19 |
| ENSG00000166148 | AVPR1A  |
| ENSG00000166206 | GABRB3  |
| ENSG00000166501 | PRKCB   |
| ENSG00000166603 | MC4R    |
| ENSG00000166736 | HTR3A   |
| ENSG00000166741 | NNMT    |
| ENSG00000166794 | PPIB    |
| ENSG00000166851 | PLK1    |
| ENSG00000167165 | UGT1A6  |
| ENSG00000167244 | IGF2    |
| ENSG00000167325 | RRM1    |
| ENSG00000167346 | MMP26   |
| ENSG00000167397 | VKORC1  |

|                 |          |
|-----------------|----------|
| ENSG00000167434 | CA4      |
| ENSG00000167468 | GPX4     |
| ENSG00000167536 | DHRS13   |
| ENSG00000167600 | CYP2S1   |
| ENSG00000167601 | AXL      |
| ENSG00000167653 | PSCA     |
| ENSG00000167657 | DAPK3    |
| ENSG00000167658 | EEF2     |
| ENSG00000167723 | TRPV3    |
| ENSG00000167900 | TK1      |
| ENSG00000167910 | CYP7A1   |
| ENSG00000167941 | SOST     |
| ENSG00000168065 | SLC22A11 |
| ENSG00000168067 | MAP4K2   |
| ENSG00000168229 | PTGDR    |
| ENSG00000168298 | HIST1H1E |
| ENSG00000168356 | SCN11A   |
| ENSG00000168398 | BDKRB2   |
| ENSG00000168412 | MTNR1A   |
| ENSG00000168522 | FNTA     |
| ENSG00000168539 | CHRM1    |
| ENSG00000168610 | STAT3    |
| ENSG00000168615 | ADAM9    |
| ENSG00000168748 | CA7      |
| ENSG00000168765 | GSTM4    |
| ENSG00000168830 | HTR1E    |
| ENSG00000168959 | GRM5     |
| ENSG00000169032 | MAP2K1   |
| ENSG00000169083 | AR       |
| ENSG00000169084 | DHRSX    |
| ENSG00000169174 | PCSK9    |
| ENSG00000169194 | IL13     |
| ENSG00000169239 | CA5B     |
| ENSG00000169245 | CXCL10   |
| ENSG00000169252 | ADRB2    |
| ENSG00000169313 | P2RY12   |
| ENSG00000169398 | PTK2     |
| ENSG00000169403 | PTAFR    |
| ENSG00000169418 | NPR1     |
| ENSG00000169427 | KCNK9    |
| ENSG00000169429 | IL8      |
| ENSG00000169432 | SCN9A    |

|                 |         |
|-----------------|---------|
| ENSG00000169442 | CD52    |
| ENSG00000169676 | DRD5    |
| ENSG00000169710 | FASN    |
| ENSG00000169783 | LINGO1  |
| ENSG00000169836 | TACR3   |
| ENSG00000169967 | MAP3K2  |
| ENSG00000170145 | SIK2    |
| ENSG00000170175 | CHRNA1  |
| ENSG00000170209 | ANKK1   |
| ENSG00000170214 | ADRA1B  |
| ENSG00000170312 | CDK1    |
| ENSG00000170421 | KRT8    |
| ENSG00000170425 | ADORA2B |
| ENSG00000170430 | MGMT    |
| ENSG00000170458 | CD14    |
| ENSG00000170558 | CDH2    |
| ENSG00000170820 | FSHR    |
| ENSG00000170899 | GSTA4   |
| ENSG00000170956 | CEACAM3 |
| ENSG00000170989 | S1PR1   |
| ENSG00000171094 | ALK     |
| ENSG00000171105 | INSR    |
| ENSG00000171132 | PRKCE   |
| ENSG00000171189 | GRIK1   |
| ENSG00000171234 | UGT2B7  |
| ENSG00000171298 | GAA     |
| ENSG00000171303 | KCNK3   |
| ENSG00000171310 | CHST11  |
| ENSG00000171345 | KRT19   |
| ENSG00000171408 | PDE7B   |
| ENSG00000171428 | NAT1    |
| ENSG00000171497 | PPID    |
| ENSG00000171522 | PTGER4  |
| ENSG00000171552 | BCL2L1  |
| ENSG00000171557 | FGG     |
| ENSG00000171560 | FGA     |
| ENSG00000171564 | FGB     |
| ENSG00000171608 | PIK3CD  |
| ENSG00000171720 | HDAC3   |
| ENSG00000171759 | PAH     |
| ENSG00000171791 | BCL2    |
| ENSG00000171848 | RRM2    |

|                 |          |
|-----------------|----------|
| ENSG00000171873 | ADRA1D   |
| ENSG00000171903 | CYP4F11  |
| ENSG00000172037 | LAMB2    |
| ENSG00000172062 | SMN1     |
| ENSG00000172156 | CCL11    |
| ENSG00000172270 | BSG      |
| ENSG00000172572 | PDE3A    |
| ENSG00000172817 | CYP7B1   |
| ENSG00000172819 | RARG     |
| ENSG00000172831 | CES2     |
| ENSG00000172889 | EGFL7    |
| ENSG00000172893 | DHCR7    |
| ENSG00000172940 | SLC22A13 |
| ENSG00000172955 | ADH6     |
| ENSG00000173020 | ADRBK1   |
| ENSG00000173153 | ESRRA    |
| ENSG00000173175 | ADCY5    |
| ENSG00000173198 | CYSLTR1  |
| ENSG00000173327 | MAP3K11  |
| ENSG00000173511 | VEGFB    |
| ENSG00000173585 | CCR9     |
| ENSG00000173597 | SULT1B1  |
| ENSG00000173610 | UGT2A1   |
| ENSG00000173638 | SLC19A1  |
| ENSG00000173930 | SLCO4C1  |
| ENSG00000174156 | GSTA3    |
| ENSG00000174175 | SELP     |
| ENSG00000174292 | TNK1     |
| ENSG00000174417 | TRHR     |
| ENSG00000174607 | UGT8     |
| ENSG00000174640 | SLCO2A1  |
| ENSG00000174669 | SLC29A2  |
| ENSG00000174672 | BRSK2    |
| ENSG00000174775 | HRAS     |
| ENSG00000174807 | CD248    |
| ENSG00000174990 | CA5A     |
| ENSG00000175003 | SLC22A1  |
| ENSG00000175040 | CHST2    |
| ENSG00000175206 | NPPA     |
| ENSG00000175264 | CHST1    |
| ENSG00000175305 | CCNE2    |
| ENSG00000175344 | CHRNA7   |

|                 |          |
|-----------------|----------|
| ENSG00000175535 | PNLIP    |
| ENSG00000175591 | P2RY2    |
| ENSG00000175756 | AURKAIP1 |
| ENSG00000176014 | TUBB6    |
| ENSG00000176105 | YES1     |
| ENSG00000176136 | MC5R     |
| ENSG00000176153 | GPX2     |
| ENSG00000176387 | HSD11B2  |
| ENSG00000176444 | CLK2     |
| ENSG00000176463 | SLCO3A1  |
| ENSG00000176601 | MAP3K19  |
| ENSG00000176749 | CDK5R1   |
| ENSG00000176884 | GRIN1    |
| ENSG00000176890 | TYMS     |
| ENSG00000177084 | POLE     |
| ENSG00000177169 | ULK1     |
| ENSG00000177189 | RPS6KA3  |
| ENSG00000177455 | CD19     |
| ENSG00000177628 | GBA      |
| ENSG00000177663 | IL17RA   |
| ENSG00000178035 | IMPDH2   |
| ENSG00000178084 | HTR3C    |
| ENSG00000178394 | HTR1A    |
| ENSG00000178467 | P4HTM    |
| ENSG00000178562 | CD28     |
| ENSG00000178568 | ERBB4    |
| ENSG00000178607 | ERN1     |
| ENSG00000178623 | GPR35    |
| ENSG00000178950 | GAK      |
| ENSG00000178999 | AURKB    |
| ENSG00000179097 | HTR1F    |
| ENSG00000179142 | CYP11B2  |
| ENSG00000179546 | HTR1D    |
| ENSG00000179603 | GRM8     |
| ENSG00000179921 | GPBAR1   |
| ENSG00000180176 | TH       |
| ENSG00000180210 | F2       |
| ENSG00000180370 | PAK2     |
| ENSG00000180432 | CYP8B1   |
| ENSG00000180616 | SSTR2    |
| ENSG00000180638 | SLC47A2  |
| ENSG00000180720 | CHRM4    |

|                 |          |
|-----------------|----------|
| ENSG00000180739 | S1PR5    |
| ENSG00000180767 | CHST13   |
| ENSG00000180772 | AGTR2    |
| ENSG00000180815 | MAP3K15  |
| ENSG00000180871 | CXCR2    |
| ENSG00000180914 | OXTR     |
| ENSG00000181019 | NQO1     |
| ENSG00000181072 | CHRM2    |
| ENSG00000181085 | MAPK15   |
| ENSG00000181104 | F2R      |
| ENSG00000181143 | MUC16    |
| ENSG00000181408 | UTS2R    |
| ENSG00000181856 | SLC2A4   |
| ENSG00000182256 | GABRG3   |
| ENSG00000182333 | LIPF     |
| ENSG00000182541 | LIMK2    |
| ENSG00000182578 | CSF1R    |
| ENSG00000182580 | EPHB3    |
| ENSG00000182782 | HCAR2    |
| ENSG00000182793 | GSTA5    |
| ENSG00000182866 | LCK      |
| ENSG00000183044 | ABAT     |
| ENSG00000183049 | CAMK1D   |
| ENSG00000183134 | PTGDR2   |
| ENSG00000183196 | CHST6    |
| ENSG00000183317 | EPHA10   |
| ENSG00000183421 | RIPK4    |
| ENSG00000183454 | GRIN2A   |
| ENSG00000183473 | SSTR3    |
| ENSG00000183735 | TBK1     |
| ENSG00000183765 | CHEK2    |
| ENSG00000183813 | CCR4     |
| ENSG00000183873 | SCN5A    |
| ENSG00000183943 | PRKX     |
| ENSG00000184156 | KCNQ3    |
| ENSG00000184160 | ADRA2C   |
| ENSG00000184216 | IRAK1    |
| ENSG00000184254 | ALDH1A3  |
| ENSG00000184304 | PRKD1    |
| ENSG00000184343 | SRPK3    |
| ENSG00000184357 | HIST1H1B |
| ENSG00000184371 | CSF1     |

|                 |          |
|-----------------|----------|
| ENSG00000184428 | TOP1MT   |
| ENSG00000184544 | DHRS7C   |
| ENSG00000184588 | PDE4B    |
| ENSG00000184674 | GSTT1    |
| ENSG00000184845 | DRD1     |
| ENSG00000184937 | WT1      |
| ENSG00000184984 | CHRM5    |
| ENSG00000184999 | SLC22A10 |
| ENSG00000185010 | F8       |
| ENSG00000185015 | CA13     |
| ENSG00000185231 | MC2R     |
| ENSG00000185291 | IL3RA    |
| ENSG00000185313 | SCN10A   |
| ENSG00000185386 | MAPK11   |
| ENSG00000185499 | MUC1     |
| ENSG00000185513 | L3MBTL1  |
| ENSG00000185559 | DLK1     |
| ENSG00000185664 | PMEL     |
| ENSG00000185686 | PRAME    |
| ENSG00000185760 | KCNQ5    |
| ENSG00000185974 | GRK1     |
| ENSG00000186009 | ATP4B    |
| ENSG00000186038 | HTR3E    |
| ENSG00000186090 | HTR3D    |
| ENSG00000186104 | CYP2R1   |
| ENSG00000186115 | CYP4F2   |
| ENSG00000186160 | CYP4Z1   |
| ENSG00000186204 | CYP4F12  |
| ENSG00000186297 | GABRA5   |
| ENSG00000186318 | BACE1    |
| ENSG00000186350 | RXRA     |
| ENSG00000186526 | CYP4F8   |
| ENSG00000186529 | CYP4F3   |
| ENSG00000186716 | BCR      |
| ENSG00000186795 | KCNK18   |
| ENSG00000186803 | IFNA10   |
| ENSG00000186827 | TNFRSF4  |
| ENSG00000186868 | MAPT     |
| ENSG00000186891 | TNFRSF18 |
| ENSG00000186951 | PPARA    |
| ENSG00000187010 | RHD      |
| ENSG00000187048 | CYP4A11  |

|                 |          |
|-----------------|----------|
| ENSG00000187134 | AKR1C1   |
| ENSG00000187258 | NPSR1    |
| ENSG00000187266 | EPOR     |
| ENSG00000187486 | KCNJ11   |
| ENSG00000187553 | CYP26C1  |
| ENSG00000187630 | DHRS4L2  |
| ENSG00000187758 | ADH1A    |
| ENSG00000187837 | HIST1H1C |
| ENSG00000188130 | MAPK12   |
| ENSG00000188229 | TUBB4B   |
| ENSG00000188257 | PLA2G2A  |
| ENSG00000188379 | IFNA2    |
| ENSG00000188389 | PDCD1    |
| ENSG00000188404 | SELL     |
| ENSG00000188641 | DPYD     |
| ENSG00000188778 | ADRB3    |
| ENSG00000188784 | PLA2G2E  |
| ENSG00000188822 | CNR2     |
| ENSG00000188906 | LRRK2    |
| ENSG00000189013 | KIR2DL4  |
| ENSG00000189060 | H1FO     |
| ENSG00000189091 | SF3B3    |
| ENSG00000189221 | MAOA     |
| ENSG00000196126 | HLA-DRB1 |
| ENSG00000196132 | MYT1     |
| ENSG00000196139 | AKR1C3   |
| ENSG00000196188 | CTSE     |
| ENSG00000196218 | RYR1     |
| ENSG00000196230 | TUBB     |
| ENSG00000196262 | PPIA     |
| ENSG00000196305 | IARS     |
| ENSG00000196344 | ADH7     |
| ENSG00000196352 | CD55     |
| ENSG00000196411 | EPHB4    |
| ENSG00000196468 | FGF16    |
| ENSG00000196498 | NCOR2    |
| ENSG00000196502 | SULT1A1  |
| ENSG00000196517 | SLC6A9   |
| ENSG00000196549 | MME      |
| ENSG00000196557 | CACNA1H  |
| ENSG00000196569 | LAMA2    |
| ENSG00000196591 | HDAC2    |

|                 |          |
|-----------------|----------|
| ENSG00000196611 | MMP1     |
| ENSG00000196616 | ADH1B    |
| ENSG00000196620 | UGT2B15  |
| ENSG00000196639 | HRH1     |
| ENSG00000196664 | TLR7     |
| ENSG00000196689 | TRPV1    |
| ENSG00000196730 | DAPK1    |
| ENSG00000196811 | CHRNA1   |
| ENSG00000196839 | ADA      |
| ENSG00000196876 | SCN8A    |
| ENSG00000196878 | LAMB3    |
| ENSG00000197122 | SRC      |
| ENSG00000197150 | ABCB8    |
| ENSG00000197165 | SULT1A2  |
| ENSG00000197208 | SLC22A4  |
| ENSG00000197299 | BLM      |
| ENSG00000197375 | SLC22A5  |
| ENSG00000197386 | HTT      |
| ENSG00000197408 | CYP2B6   |
| ENSG00000197442 | MAP3K5   |
| ENSG00000197446 | CYP2F1   |
| ENSG00000197448 | GSTK1    |
| ENSG00000197506 | SLC28A3  |
| ENSG00000197561 | ELANE    |
| ENSG00000197616 | MYH6     |
| ENSG00000197635 | DPP4     |
| ENSG00000197646 | PDCD1LG2 |
| ENSG00000197766 | CFD      |
| ENSG00000197838 | CYP2A13  |
| ENSG00000197888 | UGT2B17  |
| ENSG00000197891 | SLC22A12 |
| ENSG00000197894 | ADH5     |
| ENSG00000197901 | SLC22A6  |
| ENSG00000197919 | IFNA1    |
| ENSG00000198001 | IRAK4    |
| ENSG00000198049 | AVPR1B   |
| ENSG00000198074 | AKR1B10  |
| ENSG00000198077 | CYP2A7   |
| ENSG00000198099 | ADH4     |
| ENSG00000198121 | LPAR1    |
| ENSG00000198189 | HSD17B11 |
| ENSG00000198203 | SULT1C2  |

|                 |           |
|-----------------|-----------|
| ENSG00000198223 | CSF2RA    |
| ENSG00000198355 | PIM3      |
| ENSG00000198400 | NTRK1     |
| ENSG00000198431 | TXNRD1    |
| ENSG00000198502 | HLA-DRB5  |
| ENSG00000198598 | MMP17     |
| ENSG00000198691 | ABCA4     |
| ENSG00000198704 | GPX6      |
| ENSG00000198734 | F5        |
| ENSG00000198785 | GRIN3A    |
| ENSG00000198793 | MTOR      |
| ENSG00000198805 | PNP       |
| ENSG00000198822 | GRM3      |
| ENSG00000198838 | RYR3      |
| ENSG00000198848 | CES1      |
| ENSG00000198851 | CD3E      |
| ENSG00000198900 | TOP1      |
| ENSG00000198909 | MAP3K3    |
| ENSG00000198947 | DMD       |
| ENSG00000203797 | DDO       |
| ENSG00000203859 | HSD3B2    |
| ENSG00000204231 | RXRB      |
| ENSG00000204264 | PSMB8     |
| ENSG00000204287 | HLA-DRA   |
| ENSG00000204385 | SLC44A4   |
| ENSG00000204427 | ABHD16A   |
| ENSG00000204580 | DDR1      |
| ENSG00000204681 | GABBR1    |
| ENSG00000204983 | PRSS1     |
| ENSG00000205155 | PSENN     |
| ENSG00000205268 | PDE7A     |
| ENSG00000205359 | SLCO6A1   |
| ENSG00000205571 | SMN2      |
| ENSG00000205755 | CRLF2     |
| ENSG00000206503 | HLA-A     |
| ENSG00000211445 | GPX3      |
| ENSG00000211452 | DIO1      |
| ENSG00000211699 | TRGV3     |
| ENSG00000211707 | TRBV7-1   |
| ENSG00000211810 | TRAV29DV5 |
| ENSG00000211891 | IGHE      |
| ENSG00000212122 | TSSK1B    |

|                 |         |
|-----------------|---------|
| ENSG00000213341 | CHUK    |
| ENSG00000213366 | GSTM2   |
| ENSG00000213694 | S1PR3   |
| ENSG00000213759 | UGT2B11 |
| ENSG00000213903 | LTB4R   |
| ENSG00000213923 | CSNK1E  |
| ENSG00000214042 | IFNA7   |
| ENSG00000214102 | WEE2    |
| ENSG00000215182 | MUC5AC  |
| ENSG00000215644 | GCGR    |
| ENSG00000220205 | VAMP2   |
| ENSG00000221867 | MAGEA3  |
| ENSG00000222040 | ADRA2B  |
| ENSG00000226979 | LTA     |
| ENSG00000227507 | LTB     |
| ENSG00000228716 | DHFR    |
| ENSG00000229164 | TRAC    |
| ENSG00000232810 | TNF     |
| ENSG00000233276 | GPX1    |
| ENSG00000236637 | IFNA4   |
| ENSG00000239697 | TNFSF12 |
| ENSG00000239732 | TLR9    |
| ENSG00000240224 | UGT1A5  |
| ENSG00000241119 | UGT1A9  |
| ENSG00000241186 | TDGF1   |
| ENSG00000241635 | UGT1A8  |
| ENSG00000242366 | UGT1A1  |
| ENSG00000242515 | UGT1A10 |
| ENSG00000243135 | UGT1A3  |
| ENSG00000243480 | AMY2A   |
| ENSG00000243772 | KIR2DL3 |
| ENSG00000243955 | GSTA1   |
| ENSG00000244067 | GSTA2   |
| ENSG00000244122 | UGT1A7  |
| ENSG00000244474 | UGT1A4  |
| ENSG00000248144 | ADH1C   |
| ENSG00000254087 | LYN     |
| ENSG00000255974 | CYP2A6  |
| ENSG00000256713 | PGA5    |
| ENSG00000257335 | MGAM    |
| ENSG00000257365 | FNTB    |
| ENSG00000258429 | PDF     |

|                 |              |
|-----------------|--------------|
| ENSG00000258839 | MC1R         |
| ENSG00000258947 |              |
| ENSG00000259207 | ITGB3        |
| ENSG00000261052 | SULT1A3      |
| ENSG00000267534 | S1PR2        |
| ENSG00000269858 | EGLN2        |
| ENSG00000270024 | C8orf44-SGK3 |
| ENSG00000273079 | GRIN2B       |
| ENSG0000001036  | FUCA2        |
| ENSG0000001084  | GCLC         |
| ENSG0000002330  | BAD          |
| ENSG0000002726  | AOC1         |
| ENSG0000004487  | KDM1A        |
| ENSG0000005339  | CREBBP       |
| ENSG0000006062  | MAP3K14      |
| ENSG0000006634  | DBF4         |
| ENSG0000006837  | CDKL3        |
| ENSG0000007952  | NOX1         |
| ENSG0000008118  | CAMK1G       |
| ENSG0000008128  | CDK11A       |
| ENSG0000008516  | MMP25        |
| ENSG0000010219  | DYRK4        |
| ENSG0000010379  | SLC6A13      |
| ENSG0000010438  | PRSS3        |
| ENSG0000011304  | PTBP1        |
| ENSG0000011405  | PIK3C2A      |
| ENSG0000011422  | PLAUR        |
| ENSG0000011485  | PPP5C        |
| ENSG0000012048  | BRCA1        |
| ENSG0000014216  | CAPN1        |
| ENSG0000014257  | ACPP         |
| ENSG0000025434  | NR1H3        |
| ENSG0000025708  | TYMP         |
| ENSG0000027644  | INSRR        |
| ENSG0000031544  | NR2E3        |
| ENSG0000033178  | UBA6         |
| ENSG0000036473  | OTC          |
| ENSG0000036565  | SLC18A1      |
| ENSG0000036672  | USP2         |
| ENSG0000041880  | PARP3        |
| ENSG0000044574  | HSPA5        |
| ENSG0000049247  | UTS2         |

|                 |           |
|-----------------|-----------|
| ENSG00000051180 | RAD51     |
| ENSG00000055332 | EIF2AK2   |
| ENSG00000055732 | MCOLN3    |
| ENSG00000056291 | NPFFR2    |
| ENSG00000057252 | SOAT1     |
| ENSG00000058091 | CDK14     |
| ENSG00000059758 | CDK17     |
| ENSG00000060982 | BCAT1     |
| ENSG00000064601 | CTSA      |
| ENSG00000064651 | SLC12A2   |
| ENSG00000064687 | ABCA7     |
| ENSG00000065427 | KARS      |
| ENSG00000065833 | ME1       |
| ENSG00000066044 | ELAVL1    |
| ENSG00000066135 | KDM4A     |
| ENSG00000068903 | SIRT2     |
| ENSG00000068976 | PYGM      |
| ENSG00000069956 | MAPK6     |
| ENSG00000070501 | POLB      |
| ENSG00000070610 | GBA2      |
| ENSG00000070759 | TESK2     |
| ENSG00000070770 | CSNK2A2   |
| ENSG00000070831 | CDC42     |
| ENSG00000071909 | MYO3B     |
| ENSG00000073009 | IKBKG     |
| ENSG00000073060 | SCARB1    |
| ENSG00000074047 | GLI2      |
| ENSG00000074416 | MGLL      |
| ENSG00000074603 | DPP8      |
| ENSG00000075673 | ATP12A    |
| ENSG00000076555 | ACACB     |
| ENSG00000077616 | NAALAD2   |
| ENSG00000078061 | ARAF      |
| ENSG00000078142 | PIK3C3    |
| ENSG00000078549 | ADCYAP1R1 |
| ENSG00000079215 | SLC1A3    |
| ENSG00000079435 | LIPE      |
| ENSG00000080618 | CPB2      |
| ENSG00000080709 | KCNN2     |
| ENSG00000084072 | PPIE      |
| ENSG00000084774 | CAD       |
| ENSG00000085377 | PREP      |

|                 |          |
|-----------------|----------|
| ENSG00000086061 | DNAJA1   |
| ENSG00000086232 | EIF2AK1  |
| ENSG00000086696 | HSD17B2  |
| ENSG00000086991 | NOX4     |
| ENSG00000087095 | NLK      |
| ENSG00000088305 | DNMT3B   |
| ENSG00000088926 | F11      |
| ENSG00000089022 | MAPKAPK5 |
| ENSG00000089041 | P2RX7    |
| ENSG00000089050 | RBBP9    |
| ENSG00000089685 | BIRC5    |
| ENSG00000091428 | RAPGEF4  |
| ENSG00000091704 | CPA1     |
| ENSG00000092295 | TGM1     |
| ENSG00000092531 | SNAP23   |
| ENSG00000095015 | MAP3K1   |
| ENSG00000095777 | MYO3A    |
| ENSG00000097046 | CDC7     |
| ENSG00000099194 | SCD      |
| ENSG00000099810 | MTAP     |
| ENSG00000100219 | XBP1     |
| ENSG00000100300 | TSPO     |
| ENSG00000100312 | ACR      |
| ENSG00000100324 | TAB1     |
| ENSG00000100393 | EP300    |
| ENSG00000100448 | CTSG     |
| ENSG00000100453 | GZMB     |
| ENSG00000100490 | CDKL1    |
| ENSG00000100504 | PYGL     |
| ENSG00000100906 | NFKBIA   |
| ENSG00000101049 | SGK2     |
| ENSG00000101160 | CTSZ     |
| ENSG00000101224 | CDC25B   |
| ENSG00000101323 | HAO1     |
| ENSG00000101444 | AHCY     |
| ENSG00000101670 | LIPG     |
| ENSG00000101916 | TLR8     |
| ENSG00000101945 | SUV39H1  |
| ENSG00000101958 | GLRA2    |
| ENSG00000101981 | F9       |
| ENSG00000102172 | SMS      |
| ENSG00000102195 | GPR50    |

|                 |          |
|-----------------|----------|
| ENSG00000102239 | BRS3     |
| ENSG00000102554 | KLF5     |
| ENSG00000102699 | PARP4    |
| ENSG00000103150 | MLYCD    |
| ENSG00000103319 | EEF2K    |
| ENSG00000103811 | CTSH     |
| ENSG00000104332 | SFRP1    |
| ENSG00000104885 | DOT1L    |
| ENSG00000105143 | SLC1A6   |
| ENSG00000105426 | PTPRS    |
| ENSG00000105486 | LIG1     |
| ENSG00000105492 | SIGLEC6  |
| ENSG00000105501 | SIGLEC5  |
| ENSG00000105642 | KCNN1    |
| ENSG00000105835 | NAMPT    |
| ENSG00000106018 | VIPR2    |
| ENSG00000106100 | NOD1     |
| ENSG00000106144 | CASP2    |
| ENSG00000106366 | SERPINE1 |
| ENSG00000106633 | GCK      |
| ENSG00000106682 | EIF4H    |
| ENSG00000106683 | LIMK1    |
| ENSG00000107077 | KDM4C    |
| ENSG00000107593 | PKD2L1   |
| ENSG00000107779 | BMPR1A   |
| ENSG00000107798 | LIPA     |
| ENSG00000107968 | MAP3K8   |
| ENSG00000108179 | PIIF     |
| ENSG00000108379 | WNT3     |
| ENSG00000108479 | GALK1    |
| ENSG00000108788 | MLX      |
| ENSG00000108839 | ALOX12   |
| ENSG00000108861 | DUSP3    |
| ENSG00000109321 | AREG     |
| ENSG00000109323 | MANBA    |
| ENSG00000109576 | AADAT    |
| ENSG00000109861 | CTSC     |
| ENSG00000109991 | P2RX3    |
| ENSG00000110090 | CPT1A    |
| ENSG00000110436 | SLC1A2   |
| ENSG00000110881 | ASIC1    |
| ENSG00000110887 | DAO      |

|                 |          |
|-----------------|----------|
| ENSG00000110911 | SLC11A2  |
| ENSG00000111199 | TRPV4    |
| ENSG00000111640 | GAPDH    |
| ENSG00000111716 | LDHB     |
| ENSG00000111725 | PRKAB1   |
| ENSG00000111886 | GABRR2   |
| ENSG00000112079 | STK38    |
| ENSG00000112245 | PTP4A1   |
| ENSG00000112486 | CCR6     |
| ENSG00000112701 | SENP6    |
| ENSG00000113262 | GRM6     |
| ENSG00000113407 | TARS     |
| ENSG00000113441 | LNPEP    |
| ENSG00000114166 | KAT2B    |
| ENSG00000114491 | UMPS     |
| ENSG00000114670 | NEK11    |
| ENSG00000114738 | MAPKAPK3 |
| ENSG00000114739 | ACVR2B   |
| ENSG00000114812 | VIPR1    |
| ENSG00000114854 | TNNC1    |
| ENSG00000114857 | NKTR     |
| ENSG00000114904 | NEK4     |
| ENSG00000114999 | TTL      |
| ENSG00000115233 | PSMD14   |
| ENSG00000115252 | PDE1A    |
| ENSG00000115415 | STAT1    |
| ENSG00000115457 | IGFBP2   |
| ENSG00000115461 | IGFBP5   |
| ENSG00000115665 | SLC5A7   |
| ENSG00000115687 | PASK     |
| ENSG00000115828 | QPCT     |
| ENSG00000115919 | KYNU     |
| ENSG00000116014 | KISS1R   |
| ENSG00000116016 | EPAS1    |
| ENSG00000116039 | ATP6V1B1 |
| ENSG00000116171 | SCP2     |
| ENSG00000116237 | ICMT     |
| ENSG00000116337 | AMPD2    |
| ENSG00000116649 | SRM      |
| ENSG00000116748 | AMPD1    |
| ENSG00000116882 | HAO2     |
| ENSG00000117009 | KMO      |

|                 |         |
|-----------------|---------|
| ENSG00000117152 | RGS4    |
| ENSG00000117266 | CDK18   |
| ENSG00000117298 | ECE1    |
| ENSG00000117308 | GALE    |
| ENSG00000117394 | SLC2A1  |
| ENSG00000117834 | SLC5A9  |
| ENSG00000118194 | TNNT2   |
| ENSG00000118515 | SGK1    |
| ENSG00000118762 | PKD2    |
| ENSG00000118939 | UCHL3   |
| ENSG00000119121 | TRPM6   |
| ENSG00000119408 | NEK6    |
| ENSG00000119638 | NEK9    |
| ENSG00000119912 | IDE     |
| ENSG00000119915 | ELOVL3  |
| ENSG00000120054 | CPN1    |
| ENSG00000120868 | APAF1   |
| ENSG00000121774 | KHDRBS1 |
| ENSG00000121858 | TNFSF10 |
| ENSG00000121989 | ACVR2A  |
| ENSG00000122012 | SV2C    |
| ENSG00000122121 | XPNPEP2 |
| ENSG00000122861 | PLAU    |
| ENSG00000122873 | CISD1   |
| ENSG00000123268 | ATF1    |
| ENSG00000123358 | NR4A1   |
| ENSG00000123360 | PDE1B   |
| ENSG00000123454 | DBH     |
| ENSG00000123700 | KCNJ2   |
| ENSG00000123815 | ADCK4   |
| ENSG00000123992 | DNPEP   |
| ENSG00000124140 | SLC12A5 |
| ENSG00000124151 | NCOA3   |
| ENSG00000124253 | PCK1    |
| ENSG00000124299 | PEPD    |
| ENSG00000124491 | F13A1   |
| ENSG00000124493 | GRM4    |
| ENSG00000124762 | CDKN1A  |
| ENSG00000124767 | GLO1    |
| ENSG00000125378 | BMP4    |
| ENSG00000125780 | TGM3    |
| ENSG00000126012 | KDM5C   |

|                 |          |
|-----------------|----------|
| ENSG00000126247 | CAPNS1   |
| ENSG00000126261 | UBA2     |
| ENSG00000126262 | FFAR2    |
| ENSG00000126368 | NR1D1    |
| ENSG00000126561 | STAT5A   |
| ENSG00000126602 | TRAP1    |
| ENSG00000127329 | PTPRB    |
| ENSG00000127445 | PIN1     |
| ENSG00000127472 | PLA2G5   |
| ENSG00000127564 | PKMYT1   |
| ENSG00000127947 | PTPN12   |
| ENSG00000128285 | MCHR1    |
| ENSG00000128310 | GALR3    |
| ENSG00000128383 | APOBEC3A |
| ENSG00000128951 | DUT      |
| ENSG00000129167 | TPH1     |
| ENSG00000129219 | PLD2     |
| ENSG00000129450 | SIGLEC9  |
| ENSG00000129473 | BCL2L2   |
| ENSG00000129991 | TNNI3    |
| ENSG00000130037 | KCNA5    |
| ENSG00000130164 | LDLR     |
| ENSG00000130234 | ACE2     |
| ENSG00000130821 | SLC6A8   |
| ENSG00000130948 | HSD17B3  |
| ENSG00000131203 | IDO1     |
| ENSG00000131408 | NR1H2    |
| ENSG00000131473 | ACLY     |
| ENSG00000131480 | AOC2     |
| ENSG00000131482 | G6PC     |
| ENSG00000132142 | ACACA    |
| ENSG00000132164 | SLC6A11  |
| ENSG00000132196 | HSD17B7  |
| ENSG00000132670 | PTPRA    |
| ENSG00000132840 | BHMT2    |
| ENSG00000132906 | CASP9    |
| ENSG00000132915 | PDE6A    |
| ENSG00000133056 | PIK3C2B  |
| ENSG00000133275 | CSNK1G2  |
| ENSG00000133706 | LARS     |
| ENSG00000133805 | AMPD3    |
| ENSG00000134072 | CAMK1    |

|                 |         |
|-----------------|---------|
| ENSG00000134216 | CHIA    |
| ENSG00000134242 | PTPN22  |
| ENSG00000134333 | LDHA    |
| ENSG00000134480 | CCNH    |
| ENSG00000134684 | YARS    |
| ENSG00000134817 | APLNR   |
| ENSG00000134899 | ERCC5   |
| ENSG00000135124 | P2RX4   |
| ENSG00000135486 | HNRNPA1 |
| ENSG00000135577 | NMBR    |
| ENSG00000135587 | SMPD2   |
| ENSG00000135678 | CPM     |
| ENSG00000135898 | GPR55   |
| ENSG00000136098 | NEK3    |
| ENSG00000136448 | NMT1    |
| ENSG00000136810 | TXN     |
| ENSG00000136869 | TLR4    |
| ENSG00000136877 | FPGS    |
| ENSG00000136931 | NR5A1   |
| ENSG00000136960 | ENPP2   |
| ENSG00000137055 | PLAA    |
| ENSG00000137168 | PPIL1   |
| ENSG00000137563 | GGH     |
| ENSG00000137601 | NEK1    |
| ENSG00000137674 | MMP20   |
| ENSG00000137675 | MMP27   |
| ENSG00000137875 | BCL2L10 |
| ENSG00000137948 | BRDT    |
| ENSG00000138030 | KHK     |
| ENSG00000138032 | PPM1B   |
| ENSG00000138207 | RBP4    |
| ENSG00000138363 | ATIC    |
| ENSG00000138395 | CDK15   |
| ENSG00000138398 | PPIG    |
| ENSG00000138468 | SEN7    |
| ENSG00000138622 | HCN4    |
| ENSG00000138744 | NAAA    |
| ENSG00000138792 | ENPEP   |
| ENSG00000138794 | CASP6   |
| ENSG00000139144 | PIK3C2G |
| ENSG00000139190 | VAMP1   |
| ENSG00000139287 | TPH2    |

|                 |          |
|-----------------|----------|
| ENSG00000139687 | RB1      |
| ENSG00000140263 | SORD     |
| ENSG00000140287 | HDC      |
| ENSG00000140379 | BCL2A1   |
| ENSG00000140943 | MBTPS1   |
| ENSG00000141401 | IMPA2    |
| ENSG00000141753 | IGFBP4   |
| ENSG00000141837 | CACNA1A  |
| ENSG00000141867 | BRD4     |
| ENSG00000142082 | SIRT3    |
| ENSG00000142149 | HUNK     |
| ENSG00000142230 | SAE1     |
| ENSG00000142453 | CARM1    |
| ENSG00000142515 | KLK3     |
| ENSG00000142619 | PADI3    |
| ENSG00000142623 | PADI1    |
| ENSG00000142657 | PGD      |
| ENSG00000142733 | MAP3K6   |
| ENSG00000142875 | PRKACB   |
| ENSG00000142920 | ADC      |
| ENSG00000142949 | PTPRF    |
| ENSG00000143224 | PPOX     |
| ENSG00000143384 | MCL1     |
| ENSG00000143393 | PI4KB    |
| ENSG00000143479 | DYRK3    |
| ENSG00000143603 | KCNN3    |
| ENSG00000143627 | PKLR     |
| ENSG00000143727 | ACP1     |
| ENSG00000143776 | CDC42BPA |
| ENSG00000143933 | CALM2    |
| ENSG00000144407 | PTH2R    |
| ENSG00000144476 | ACKR3    |
| ENSG00000144579 | CTDSP1   |
| ENSG00000144959 | NCEH1    |
| ENSG00000145284 | SCD5     |
| ENSG00000145335 | SNCA     |
| ENSG00000145384 | FABP2    |
| ENSG00000145451 | GLRA3    |
| ENSG00000145632 | PLK2     |
| ENSG00000145675 | PIK3R1   |
| ENSG00000145692 | BHMT     |
| ENSG00000145730 | PAM      |

|                 |           |
|-----------------|-----------|
| ENSG00000145982 | FARS2     |
| ENSG00000146276 | GABRR1    |
| ENSG00000146674 | IGFBP3    |
| ENSG00000146678 | IGFBP1    |
| ENSG00000147044 | CASK      |
| ENSG00000147262 | GPR119    |
| ENSG00000147432 | CHRNA3    |
| ENSG00000147434 | CHRNA6    |
| ENSG00000148734 | NPFPR1    |
| ENSG00000148832 | PAOX      |
| ENSG00000149311 | ATM       |
| ENSG00000149418 | ST14      |
| ENSG00000149451 | ADAM33    |
| ENSG00000149930 | TAOK2     |
| ENSG00000151292 | CSNK1G3   |
| ENSG00000151414 | NEK7      |
| ENSG00000151552 | QDPR      |
| ENSG00000151632 | AKR1C2    |
| ENSG00000151651 | ADAM8     |
| ENSG00000151704 | KCNJ1     |
| ENSG00000151790 | TDO2      |
| ENSG00000152034 | MCHR2     |
| ENSG00000152256 | PDK1      |
| ENSG00000152495 | CAMK4     |
| ENSG00000152689 | RASGRP3   |
| ENSG00000152904 | GGPS1     |
| ENSG00000152953 | STK32B    |
| ENSG00000153002 | CPB1      |
| ENSG00000153201 | RANBP2    |
| ENSG00000153234 | NR4A2     |
| ENSG00000153802 | TMPRSS11D |
| ENSG00000154025 | SLC5A10   |
| ENSG00000154277 | UCHL1     |
| ENSG00000154678 | PDE1C     |
| ENSG00000154734 | ADAMTS1   |
| ENSG00000154736 | ADAMTS5   |
| ENSG00000155096 | AZIN1     |
| ENSG00000156110 | ADK       |
| ENSG00000156113 | KCNMA1    |
| ENSG00000156136 | DCK       |
| ENSG00000156510 | HKDC1     |
| ENSG00000157106 | SMG1      |

|                 |          |
|-----------------|----------|
| ENSG00000157184 | CPT2     |
| ENSG00000157554 | ERG      |
| ENSG00000157778 | PSMG3    |
| ENSG00000158402 | CDC25C   |
| ENSG00000158786 | PLA2G2F  |
| ENSG00000158859 | ADAMTS4  |
| ENSG00000158865 | SLC5A11  |
| ENSG00000159267 | HLCS     |
| ENSG00000159403 | C1R      |
| ENSG00000159593 | NAE1     |
| ENSG00000159788 | RGS12    |
| ENSG00000160014 | CALM3    |
| ENSG00000160191 | PDE9A    |
| ENSG00000160211 | G6PD     |
| ENSG00000160285 | LSS      |
| ENSG00000160307 | S100B    |
| ENSG00000161570 | CCL5     |
| ENSG00000161960 | EIF4A1   |
| ENSG00000162383 | SLC1A7   |
| ENSG00000162438 | CTRC     |
| ENSG00000162551 | ALPL     |
| ENSG00000162692 | VCAM1    |
| ENSG00000162711 | NLRP3    |
| ENSG00000162728 | KCNJ9    |
| ENSG00000162881 | OXER1    |
| ENSG00000162889 | MAPKAPK2 |
| ENSG00000162909 | CAPN2    |
| ENSG00000163050 | ADCK3    |
| ENSG00000163098 | BIRC8    |
| ENSG00000163106 | HPGDS    |
| ENSG00000163286 | ALPPL2   |
| ENSG00000163295 | ALPI     |
| ENSG00000163482 | STK36    |
| ENSG00000163629 | PTPN13   |
| ENSG00000163631 | ALB      |
| ENSG00000163751 | CPA3     |
| ENSG00000163788 | SNRK     |
| ENSG00000163931 | TKT      |
| ENSG00000164045 | CDC25A   |
| ENSG00000164116 | GUCY1A3  |
| ENSG00000164120 | HPGD     |
| ENSG00000164128 | NPY1R    |

|                 |          |
|-----------------|----------|
| ENSG00000164219 | PGGT1B   |
| ENSG00000164251 | F2RL1    |
| ENSG00000164305 | CASP3    |
| ENSG00000164362 | TERT     |
| ENSG00000164588 | HCN1     |
| ENSG00000165140 | FBP1     |
| ENSG00000165168 | CYBB     |
| ENSG00000165280 | VCP      |
| ENSG00000165591 | FAAH2    |
| ENSG00000165704 | HPRT1    |
| ENSG00000165752 | STK32C   |
| ENSG00000165806 | CASP7    |
| ENSG00000165862 | PNLIPRP2 |
| ENSG00000165970 | SLC6A5   |
| ENSG00000166192 | SENPA8   |
| ENSG00000166483 | WEE1     |
| ENSG00000166484 | MAPK7    |
| ENSG00000166548 | TK2      |
| ENSG00000166598 | HSP90B1  |
| ENSG00000166670 | MMP10    |
| ENSG00000166825 | ANPEP    |
| ENSG00000166828 | SCNN1G   |
| ENSG00000166888 | STAT6    |
| ENSG00000166908 | PIP4K2C  |
| ENSG00000166948 | TGM6     |
| ENSG00000166949 | SMAD3    |
| ENSG00000166986 | MARS     |
| ENSG00000167114 | SLC27A4  |
| ENSG00000167207 | NOD2     |
| ENSG00000167261 | DPEP2    |
| ENSG00000167280 | ENGASE   |
| ENSG00000167508 | MVD      |
| ENSG00000167748 | KLK1     |
| ENSG00000167779 | IGFBP6   |
| ENSG00000167780 | SOAT2    |
| ENSG00000168036 | CTNNA1   |
| ENSG00000168078 | PBK      |
| ENSG00000168329 | CX3CR1   |
| ENSG00000168397 | ATG4B    |
| ENSG00000168447 | SCNN1B   |
| ENSG00000168487 | BMP1     |
| ENSG00000168496 | FEN1     |

|                 |          |
|-----------------|----------|
| ENSG00000168646 | AXIN2    |
| ENSG00000168925 | CTRB1    |
| ENSG00000168938 | PPIC     |
| ENSG00000169118 | CSNK1G1  |
| ENSG00000169302 | STK32A   |
| ENSG00000169618 | PROKR1   |
| ENSG00000169684 | CHRNA5   |
| ENSG00000169692 | AGPAT2   |
| ENSG00000169860 | P2RY1    |
| ENSG00000169925 | BRD3     |
| ENSG00000170027 | YWHAG    |
| ENSG00000170242 | USP47    |
| ENSG00000170255 | MRGPRX1  |
| ENSG00000170266 | GLB1     |
| ENSG00000170323 | FABP4    |
| ENSG00000170345 | FOS      |
| ENSG00000170390 | DCLK2    |
| ENSG00000170522 | ELOVL6   |
| ENSG00000170835 | CEL      |
| ENSG00000170890 | PLA2G1B  |
| ENSG00000171049 | FPR2     |
| ENSG00000171051 | FPR1     |
| ENSG00000171219 | CDC42BPG |
| ENSG00000171509 | RXFP1    |
| ENSG00000171517 | LPAR3    |
| ENSG00000171631 | P2RY6    |
| ENSG00000171860 | C3AR1    |
| ENSG00000171865 | RNASEH1  |
| ENSG00000171960 | PPIH     |
| ENSG00000172071 | EIF2AK3  |
| ENSG00000172236 | TPSAB1   |
| ENSG00000172531 | PPP1CA   |
| ENSG00000172939 | OXSRI    |
| ENSG00000172943 | PHF8     |
| ENSG00000173039 | RELA     |
| ENSG00000173083 | HPSE     |
| ENSG00000173120 | KDM2A    |
| ENSG00000173213 |          |
| ENSG00000173239 | LIPM     |
| ENSG00000173273 | TNKS     |
| ENSG00000173366 |          |
| ENSG00000173486 | FKBP2    |

|                 |          |
|-----------------|----------|
| ENSG00000173653 | RCE1     |
| ENSG00000173757 | STAT5B   |
| ENSG00000173826 | KCNH6    |
| ENSG00000173846 | PLK3     |
| ENSG00000173868 | PHOSPHO1 |
| ENSG00000173876 | TUBB8    |
| ENSG00000174080 | CTSF     |
| ENSG00000174600 | CMKLR1   |
| ENSG00000174738 | NR1D2    |
| ENSG00000174876 | AMY1B    |
| ENSG00000175054 | ATR      |
| ENSG00000175354 | PTPN2    |
| ENSG00000175445 | LPL      |
| ENSG00000175634 | RPS6KB2  |
| ENSG00000176170 | SPHK1    |
| ENSG00000176393 | RNPEP    |
| ENSG00000176978 | DPP7     |
| ENSG00000177239 | MAN1B1   |
| ENSG00000177272 | KCNA3    |
| ENSG00000177453 | NIM1K    |
| ENSG00000177463 | NR2C2    |
| ENSG00000177602 | GSG2     |
| ENSG00000177606 | JUN      |
| ENSG00000177889 | UBE2N    |
| ENSG00000177954 | RPS27    |
| ENSG00000178700 | DHFRL1   |
| ENSG00000178802 | MPI      |
| ENSG00000179163 | FUCA1    |
| ENSG00000179295 | PTPN11   |
| ENSG00000179335 | CLK3     |
| ENSG00000179934 | CCR8     |
| ENSG00000180138 | CSNK1A1L |
| ENSG00000180509 | KCNE1    |
| ENSG00000180644 | PRF1     |
| ENSG00000181090 | EHMT1    |
| ENSG00000181163 | NPM1     |
| ENSG00000182240 | BACE2    |
| ENSG00000182326 | C1S      |
| ENSG00000182511 | FES      |
| ENSG00000182674 | KCNB2    |
| ENSG00000183625 | CCR3     |
| ENSG00000183696 | UPP1     |

|                 |          |
|-----------------|----------|
| ENSG00000183729 | NPBWR1   |
| ENSG00000184007 | PTP4A2   |
| ENSG00000184185 | KCNJ12   |
| ENSG00000184381 | PLA2G6   |
| ENSG00000184470 | TXNRD2   |
| ENSG00000184574 | LPAR5    |
| ENSG00000184611 | KCNH7    |
| ENSG00000185000 | DGAT1    |
| ENSG00000185149 | NPY2R    |
| ENSG00000185238 | PRMT3    |
| ENSG00000185518 | SV2B     |
| ENSG00000185532 | PRKG1    |
| ENSG00000185624 | P4HB     |
| ENSG00000186111 | PIP5K1C  |
| ENSG00000186188 | FFAR4    |
| ENSG00000186642 | PDE2A    |
| ENSG00000186810 | CXCR3    |
| ENSG00000187021 | PNLIPRP1 |
| ENSG00000187098 | MITF     |
| ENSG00000187555 | USP7     |
| ENSG00000187688 | TRPV2    |
| ENSG00000187714 | SLC18A3  |
| ENSG00000187733 | AMY1C    |
| ENSG00000187848 | P2RX2    |
| ENSG00000187980 | PLA2G2C  |
| ENSG00000188037 | CLCN1    |
| ENSG00000188322 | SBK1     |
| ENSG00000188828 | GLRA4    |
| ENSG00000189043 | NDUFA4   |
| ENSG00000196277 | GRM7     |
| ENSG00000196363 | WDR5     |
| ENSG00000196396 | PTPN1    |
| ENSG00000196482 | ESRRG    |
| ENSG00000196632 | WNK3     |
| ENSG00000197168 | NEK5     |
| ENSG00000197405 | C5AR1    |
| ENSG00000197763 | TXNRD3   |
| ENSG00000197943 | PLCG2    |
| ENSG00000198161 | PPIAL4C  |
| ENSG00000198211 | TUBB3    |
| ENSG00000198225 | FKBP1C   |
| ENSG00000198380 | GFPT1    |

|                 |          |
|-----------------|----------|
| ENSG00000198408 | MGEA5    |
| ENSG00000198586 | TLK1     |
| ENSG00000198626 | RYR2     |
| ENSG00000198648 | STK39    |
| ENSG00000198668 | CALM1    |
| ENSG00000198712 | MT-CO2   |
| ENSG00000198743 | SLC5A3   |
| ENSG00000198752 | CDC42BPB |
| ENSG00000198829 | SUCNR1   |
| ENSG00000198873 | GRK5     |
| ENSG00000198886 | MT-ND4   |
| ENSG00000198911 | SREBF2   |
| ENSG00000198959 | TGM2     |
| ENSG00000203857 | HSD3B1   |
| ENSG00000204020 | LIPN     |
| ENSG00000204021 | LIPK     |
| ENSG00000204022 | LIPJ     |
| ENSG00000204217 | BMPR2    |
| ENSG00000204256 | BRD2     |
| ENSG00000204371 | EHMT2    |
| ENSG00000204388 | HSPA1B   |
| ENSG00000204389 | HSPA1A   |
| ENSG00000204673 | AKT1S1   |
| ENSG00000205560 | CPT1B    |
| ENSG00000205595 | AREGB    |
| ENSG00000206203 | TSSK2    |
| ENSG00000211455 | STK38L   |
| ENSG00000213199 | ASIC3    |
| ENSG00000213906 | LTB4R2   |
| ENSG00000214517 | PPME1    |
| ENSG00000215301 | DDX3X    |
| ENSG00000222028 | PSMB11   |
| ENSG00000229183 | PGA4     |
| ENSG00000229859 | PGA3     |
| ENSG00000231274 | SBK3     |
| ENSG00000235268 | KDM4E    |
| ENSG00000236334 | PPIAL4G  |
| ENSG00000237763 | AMY1A    |
| ENSG00000239713 | APOBEC3G |
| ENSG00000240038 | AMY2B    |
| ENSG00000240344 | PPIL3    |
| ENSG00000240972 | MIF      |

|                 |               |
|-----------------|---------------|
| ENSG00000243708 | PLA2G4B       |
| ENSG00000244734 | HBB           |
| ENSG00000248333 | CDK11B        |
| ENSG00000250506 | CDK3          |
| ENSG00000253729 | PRKDC         |
| ENSG00000255346 | NOX5          |
| ENSG00000255398 | HCAR3         |
| ENSG00000255854 | PPIAL4B       |
| ENSG00000255963 | PPIAL4A       |
| ENSG00000256374 | PPIAL4D       |
| ENSG00000257008 | GPR142        |
| ENSG00000257743 |               |
| ENSG00000258643 | BCL2L2-PABPN1 |
| ENSG00000259753 |               |
| ENSG00000262304 |               |
| ENSG00000263620 |               |
| ENSG00000264813 |               |
| ENSG00000268500 |               |
| ENSG00000000971 | CFH           |
| ENSG00000002745 | WNT16         |
| ENSG00000003056 | M6PR          |
| ENSG00000003436 | TFPI          |
| ENSG00000004939 | SLC4A1        |
| ENSG00000006016 | CRLF1         |
| ENSG00000007062 | PROM1         |
| ENSG00000008517 | IL32          |
| ENSG00000009694 | TENM1         |
| ENSG00000009724 | MASP2         |
| ENSG00000010278 | CD9           |
| ENSG00000010319 | SEMA3G        |
| ENSG00000010704 | HFE           |
| ENSG00000011028 | MRC2          |
| ENSG00000011083 | SLC6A7        |
| ENSG00000012223 | LTF           |
| ENSG00000018236 | CNTN1         |
| ENSG00000019102 | VSIG2         |
| ENSG00000021645 | NRXN3         |
| ENSG00000023318 | ERP44         |
| ENSG00000026103 | FAS           |
| ENSG00000026297 | RNASET2       |
| ENSG00000029559 | IBSP          |
| ENSG00000030582 | GRN           |

|                 |          |
|-----------------|----------|
| ENSG00000035862 | TIMP2    |
| ENSG00000038002 | AGA      |
| ENSG00000038427 | VCAN     |
| ENSG00000039068 | CDH1     |
| ENSG00000039537 | C6       |
| ENSG00000040608 | RTN4R    |
| ENSG00000042781 | USH2A    |
| ENSG00000042832 | TG       |
| ENSG00000042980 | ADAM28   |
| ENSG00000047457 | CP       |
| ENSG00000048462 | TNFRSF17 |
| ENSG00000049130 | KITLG    |
| ENSG00000049192 | ADAMTS6  |
| ENSG00000049323 | LTBP1    |
| ENSG00000050165 | DKK3     |
| ENSG00000050767 | COL23A1  |
| ENSG00000052344 | PRSS8    |
| ENSG00000053108 | FSTL4    |
| ENSG00000054983 | GALC     |
| ENSG00000055955 | ITIH4    |
| ENSG00000055957 | ITIH1    |
| ENSG00000058668 | ATP2B4   |
| ENSG00000060237 | WNK1     |
| ENSG00000060718 | COL11A1  |
| ENSG00000061492 | WNT8A    |
| ENSG00000064205 | WISP2    |
| ENSG00000065320 | NTN1     |
| ENSG00000065618 | COL17A1  |
| ENSG00000067842 | ATP2B3   |
| ENSG00000068001 | HYAL2    |
| ENSG00000069667 | RORA     |
| ENSG00000069702 | TGFBR3   |
| ENSG00000070031 | SCT      |
| ENSG00000070081 | NUCB2    |
| ENSG00000070193 | FGF10    |
| ENSG00000071073 | MGAT4A   |
| ENSG00000071127 | WDR1     |
| ENSG00000071677 | PRLH     |
| ENSG00000072071 | LPHN1    |
| ENSG00000072110 | ACTN1    |
| ENSG00000072315 | TRPC5    |
| ENSG00000073008 | PVR      |

|                 |         |
|-----------------|---------|
| ENSG00000073754 | CD5L    |
| ENSG00000073849 | ST6GAL1 |
| ENSG00000074370 | ATP2A3  |
| ENSG00000074527 | NTN4    |
| ENSG00000075213 | SEMA3A  |
| ENSG00000075223 | SEMA3C  |
| ENSG00000077942 | FBLN1   |
| ENSG00000077943 | ITGA8   |
| ENSG00000078081 | LAMP3   |
| ENSG00000079557 | AFM     |
| ENSG00000079689 | SCGN    |
| ENSG00000080910 | CFHR2   |
| ENSG00000081041 | CXCL2   |
| ENSG00000081052 | COL4A4  |
| ENSG00000083444 | PLOD1   |
| ENSG00000085117 | CD82    |
| ENSG00000085741 | WNT11   |
| ENSG00000086062 | B4GALT1 |
| ENSG00000086289 | EPDR1   |
| ENSG00000087116 | ADAMTS2 |
| ENSG00000087303 | NID2    |
| ENSG00000087460 | GNAS    |
| ENSG00000088298 | EDEM2   |
| ENSG00000088782 | DEFB127 |
| ENSG00000088882 | CPXM1   |
| ENSG00000089012 | SIRPG   |
| ENSG00000089127 | OAS1    |
| ENSG00000089199 | CHGB    |
| ENSG00000089248 | ERP29   |
| ENSG00000090539 | CHR1    |
| ENSG00000090554 | FLT3LG  |
| ENSG00000091140 | DLD     |
| ENSG00000091409 | ITGA6   |
| ENSG00000091513 | TF      |
| ENSG00000091583 | APOH    |
| ENSG00000091986 | CCDC80  |
| ENSG00000092439 | TRPM7   |
| ENSG00000092758 | COL9A3  |
| ENSG00000095110 | NXPE1   |
| ENSG00000095587 | TLL2    |
| ENSG00000095713 | CRTAC1  |
| ENSG00000095752 | IL11    |

|                 |          |
|-----------------|----------|
| ENSG00000096264 | NCR2     |
| ENSG00000096395 | MLN      |
| ENSG00000099139 | PCSK5    |
| ENSG00000099308 | MAST3    |
| ENSG00000099769 | IGFALS   |
| ENSG00000100031 | GGT1     |
| ENSG00000100060 | MFNG     |
| ENSG00000100100 | PIK3IP1  |
| ENSG00000100292 | HMOX1    |
| ENSG00000100311 | PDGFB    |
| ENSG00000100342 | APOL1    |
| ENSG00000100368 | CSF2RB   |
| ENSG00000100450 | GZMH     |
| ENSG00000100665 | SERPINA4 |
| ENSG00000100749 | VRK1     |
| ENSG00000100979 | PLTP     |
| ENSG00000101000 | PROCR    |
| ENSG00000101203 | COL20A1  |
| ENSG00000101280 | ANGPT4   |
| ENSG00000101307 | SIRPB1   |
| ENSG00000101327 | PDYN     |
| ENSG00000101384 | JAG1     |
| ENSG00000101425 | BPI      |
| ENSG00000101435 | CST9L    |
| ENSG00000101439 | CST3     |
| ENSG00000101443 | WFDC2    |
| ENSG00000101446 | SPINT3   |
| ENSG00000101938 | CHRD1    |
| ENSG00000102575 | ACP5     |
| ENSG00000102678 | FGF9     |
| ENSG00000103044 | HAS3     |
| ENSG00000103066 | PLA2G15  |
| ENSG00000103196 | CRISPLD2 |
| ENSG00000103260 | METR1    |
| ENSG00000103522 | IL21R    |
| ENSG00000104112 | SCG3     |
| ENSG00000104324 | CPQ      |
| ENSG00000104415 | WISP1    |
| ENSG00000104432 | IL7      |
| ENSG00000104760 | FGL1     |
| ENSG00000104870 | FCGRT    |
| ENSG00000104899 | AMH      |

|                 |          |
|-----------------|----------|
| ENSG00000104901 | DKKL1    |
| ENSG00000104918 | RETN     |
| ENSG00000105088 | OLFM2    |
| ENSG00000105371 | ICAM4    |
| ENSG00000105550 | FGF21    |
| ENSG00000105609 | LILRB5   |
| ENSG00000105711 | SCN1B    |
| ENSG00000105825 | TFPI2    |
| ENSG00000105989 | WNT2     |
| ENSG00000106080 | FKBP14   |
| ENSG00000106333 | PCOLCE   |
| ENSG00000106483 | SFRP4    |
| ENSG00000106624 | AEBP1    |
| ENSG00000106692 | FKTN     |
| ENSG00000107317 | PTGDS    |
| ENSG00000107331 | ABCA2    |
| ENSG00000107562 | CXCL12   |
| ENSG00000107738 | C10orf54 |
| ENSG00000107742 | SPOCK2   |
| ENSG00000107789 | MINPP1   |
| ENSG00000108342 | CSF3     |
| ENSG00000108684 | ASIC2    |
| ENSG00000108688 | CCL7     |
| ENSG00000108821 | COL1A1   |
| ENSG00000108849 | PPY      |
| ENSG00000108883 | EFTUD2   |
| ENSG00000108947 | EFNB3    |
| ENSG00000109255 | NMU      |
| ENSG00000109472 | CPE      |
| ENSG00000109689 | STIM2    |
| ENSG00000109743 | BST1     |
| ENSG00000109758 | HGFAC    |
| ENSG00000110013 | SIAE     |
| ENSG00000110076 | NRXN2    |
| ENSG00000110080 | ST3GAL4  |
| ENSG00000110243 | APOA5    |
| ENSG00000110244 | APOA4    |
| ENSG00000110245 | APOC3    |
| ENSG00000110324 | IL10RA   |
| ENSG00000110492 | MDK      |
| ENSG00000110848 | CD69     |
| ENSG00000110876 | SELPLG   |

|                 |         |
|-----------------|---------|
| ENSG00000111186 | WNT5B   |
| ENSG00000111432 | FZD10   |
| ENSG00000111536 | IL26    |
| ENSG00000111737 | RAB35   |
| ENSG00000111801 | BTN3A3  |
| ENSG00000111981 | ULBP1   |
| ENSG00000112041 | TULP1   |
| ENSG00000112149 | CD83    |
| ENSG00000112293 | GPLD1   |
| ENSG00000112562 | SMOC2   |
| ENSG00000112799 | LY86    |
| ENSG00000113594 | LIFR    |
| ENSG00000113600 | C9      |
| ENSG00000113889 | KNG1    |
| ENSG00000113905 | HRG     |
| ENSG00000114251 | WNT5A   |
| ENSG00000114279 | FGF12   |
| ENSG00000114378 | HYAL1   |
| ENSG00000114698 | PLSCR4  |
| ENSG00000115009 | CCL20   |
| ENSG00000115138 | POMC    |
| ENSG00000115263 | GCG     |
| ENSG00000115380 | EFEMP1  |
| ENSG00000115596 | WNT6    |
| ENSG00000115602 | IL1RL1  |
| ENSG00000115604 | IL18R1  |
| ENSG00000115607 | IL18RAP |
| ENSG00000115718 | PROC    |
| ENSG00000115850 | LCT     |
| ENSG00000115956 | PLEK    |
| ENSG00000116147 | TNR     |
| ENSG00000116183 | PAPPA2  |
| ENSG00000116489 | CAPZA1  |
| ENSG00000116678 | LEPR    |
| ENSG00000116785 | CFHR3   |
| ENSG00000116815 | CD58    |
| ENSG00000116833 | NR5A2   |
| ENSG00000116962 | NID1    |
| ENSG00000116996 | ZP4     |
| ENSG00000117090 | SLAMF1  |
| ENSG00000117091 | CD48    |
| ENSG00000117122 | MFAP2   |

|                 |          |
|-----------------|----------|
| ENSG00000117281 | CD160    |
| ENSG00000117322 | CR2      |
| ENSG00000117335 | CD46     |
| ENSG00000118137 | APOA1    |
| ENSG00000118705 | RPN2     |
| ENSG00000118729 | CASQ2    |
| ENSG00000119681 | LTBP2    |
| ENSG00000120210 | INSL6    |
| ENSG00000120211 | INSL4    |
| ENSG00000120332 | TNN      |
| ENSG00000120457 | KCNJ5    |
| ENSG00000120658 | ENOX1    |
| ENSG00000120885 | CLU      |
| ENSG00000120937 | NPPB     |
| ENSG00000121064 | SCPEP1   |
| ENSG00000121316 | PLBD1    |
| ENSG00000121335 | PRB2     |
| ENSG00000121671 | CRY2     |
| ENSG00000122223 | CD244    |
| ENSG00000122224 | LY9      |
| ENSG00000122711 | SPINK4   |
| ENSG00000123243 | ITIH5    |
| ENSG00000123384 | LRP1     |
| ENSG00000123416 | TUBA1B   |
| ENSG00000123610 | TNFAIP6  |
| ENSG00000123739 | PLA2G12A |
| ENSG00000123838 | C4BPA    |
| ENSG00000123843 | C4BPB    |
| ENSG00000124067 | SLC12A4  |
| ENSG00000124145 | SDC4     |
| ENSG00000124155 | PIGT     |
| ENSG00000124159 | MATN4    |
| ENSG00000124529 | HIST1H4B |
| ENSG00000124557 | BTN1A1   |
| ENSG00000124693 | HIST1H3B |
| ENSG00000124731 | TREM1    |
| ENSG00000124783 | SSR1     |
| ENSG00000125571 | IL37     |
| ENSG00000125730 | C3       |
| ENSG00000125788 | DEFB126  |
| ENSG00000125810 | CD93     |
| ENSG00000125845 | BMP2     |

|                 |          |
|-----------------|----------|
| ENSG00000125851 | PCSK2    |
| ENSG00000125965 | GDF5     |
| ENSG00000125966 | MMP24    |
| ENSG00000126091 | ST3GAL3  |
| ENSG00000126231 | PROZ     |
| ENSG00000126353 | CCR7     |
| ENSG00000126838 | PZP      |
| ENSG00000127418 | FGFRL1   |
| ENSG00000127578 | WFIKKN1  |
| ENSG00000127743 | IL17B    |
| ENSG00000127863 | TNFRSF19 |
| ENSG00000128165 | ADM2     |
| ENSG00000128322 | IGLL1    |
| ENSG00000128342 | LIF      |
| ENSG00000128564 | VGF      |
| ENSG00000128791 | TWSG1    |
| ENSG00000129038 | LOXL1    |
| ENSG00000129226 | CD68     |
| ENSG00000129538 | RNASE1   |
| ENSG00000129965 | INS-IGF2 |
| ENSG00000129988 | LBP      |
| ENSG00000130202 | PVRL2    |
| ENSG00000130203 | APOE     |
| ENSG00000130208 | APOC1    |
| ENSG00000130287 | NCAN     |
| ENSG00000130427 | EPO      |
| ENSG00000130508 | PXDN     |
| ENSG00000130513 | GDF15    |
| ENSG00000130635 | COL5A1   |
| ENSG00000130812 | ANGPTL6  |
| ENSG00000131015 | ULBP2    |
| ENSG00000131042 | LILRB2   |
| ENSG00000131096 | PYY      |
| ENSG00000131187 | F12      |
| ENSG00000131400 | NAPSA    |
| ENSG00000131507 | NDFIP1   |
| ENSG00000131871 | VIMP     |
| ENSG00000131873 | CHSY1    |
| ENSG00000131981 | LGALS3   |
| ENSG00000132031 | MATN3    |
| ENSG00000132205 | EMILIN2  |
| ENSG00000132386 | SERPINF1 |

|                 |         |
|-----------------|---------|
| ENSG00000132561 | MATN2   |
| ENSG00000132693 | CRP     |
| ENSG00000132704 | FCRL2   |
| ENSG00000132855 | ANGPTL3 |
| ENSG00000133048 | CHI3L1  |
| ENSG00000133063 | CHIT1   |
| ENSG00000133107 | TRPC4   |
| ENSG00000133112 | TPT1    |
| ENSG00000133401 | PDZD2   |
| ENSG00000133466 | C1QTNF6 |
| ENSG00000133661 | SFTPD   |
| ENSG00000134020 | PEBP4   |
| ENSG00000134061 | CD180   |
| ENSG00000134121 | CHL1    |
| ENSG00000134160 | TRPM1   |
| ENSG00000134247 | PTGFRN  |
| ENSG00000134250 | NOTCH2  |
| ENSG00000134339 | SAA2    |
| ENSG00000134365 | CFHR4   |
| ENSG00000134376 | CRB1    |
| ENSG00000134389 | CFHR5   |
| ENSG00000134470 | IL15RA  |
| ENSG00000134545 | KLRC1   |
| ENSG00000134575 | ACP2    |
| ENSG00000134812 | GIF     |
| ENSG00000134827 | TCN1    |
| ENSG00000134871 | COL4A2  |
| ENSG00000134917 | ADAMTS8 |
| ENSG00000135046 | ANXA1   |
| ENSG00000135218 | CD36    |
| ENSG00000135404 | CD63    |
| ENSG00000135413 | LACRT   |
| ENSG00000135424 | ITGA7   |
| ENSG00000135517 | MIP     |
| ENSG00000135535 | CD164   |
| ENSG00000135750 | KCNK1   |
| ENSG00000135925 | WNT10A  |
| ENSG00000135960 | EDAR    |
| ENSG00000136250 | AOAH    |
| ENSG00000136378 | ADAMTS7 |
| ENSG00000136457 | CHAD    |
| ENSG00000136487 | GH2     |

|                 |           |
|-----------------|-----------|
| ENSG00000136488 | CSH1      |
| ENSG00000136688 | IL36G     |
| ENSG00000136689 | IL1RN     |
| ENSG00000136695 | IL36RN    |
| ENSG00000136696 | IL36B     |
| ENSG00000136697 | IL1F10    |
| ENSG00000136999 | NOV       |
| ENSG00000137033 | IL33      |
| ENSG00000137077 | CCL21     |
| ENSG00000137142 | IGFBPL1   |
| ENSG00000137251 | TINAG     |
| ENSG00000137441 | FGFBP2    |
| ENSG00000137801 | THBS1     |
| ENSG00000137809 | ITGA11    |
| ENSG00000138294 | MSMB      |
| ENSG00000138316 | ADAMTS14  |
| ENSG00000138623 | SEMA7A    |
| ENSG00000138675 | FGF5      |
| ENSG00000138684 | IL21      |
| ENSG00000138722 | MMRN1     |
| ENSG00000138755 | CXCL9     |
| ENSG00000138798 | EGF       |
| ENSG00000138829 | FBN2      |
| ENSG00000139192 | TAPBPL    |
| ENSG00000139193 | CD27      |
| ENSG00000139219 | COL2A1    |
| ENSG00000139269 | INHBE     |
| ENSG00000139329 | LUM       |
| ENSG00000139330 | KERA      |
| ENSG00000139549 | DHH       |
| ENSG00000139574 | NPFF      |
| ENSG00000139899 | CBLN3     |
| ENSG00000140092 | FBLN5     |
| ENSG00000140093 | SERPINA10 |
| ENSG00000140285 | FGF7      |
| ENSG00000140470 | ADAMTS17  |
| ENSG00000140479 | PCSK6     |
| ENSG00000140511 | HAPLN3    |
| ENSG00000140545 | MFGE8     |
| ENSG00000140564 | FURIN     |
| ENSG00000140678 | ITGAX     |
| ENSG00000140873 | ADAMTS18  |

|                 |           |
|-----------------|-----------|
| ENSG00000140945 | CDH13     |
| ENSG00000141012 | GALNS     |
| ENSG00000141068 | KSR1      |
| ENSG00000141086 | CTRL      |
| ENSG00000141098 | GFOD2     |
| ENSG00000141433 | ADCYAP1   |
| ENSG00000141505 | ASGR1     |
| ENSG00000141655 | TNFRSF11A |
| ENSG00000142156 | COL6A1    |
| ENSG00000142224 | IL19      |
| ENSG00000142303 | ADAMTS10  |
| ENSG00000142606 | MMEL1     |
| ENSG00000142615 | CELA2A    |
| ENSG00000143119 | CD53      |
| ENSG00000143125 | PROK1     |
| ENSG00000143196 | DPT       |
| ENSG00000143226 | FCGR2A    |
| ENSG00000143278 | F13B      |
| ENSG00000143297 | FCRL5     |
| ENSG00000143321 | HDGF      |
| ENSG00000143556 | S100A7    |
| ENSG00000143641 | GALNT2    |
| ENSG00000143869 | GDF7      |
| ENSG00000143870 | PDIA6     |
| ENSG00000144339 | TMEFF2    |
| ENSG00000144455 | SUMF1     |
| ENSG00000144619 | CNTN4     |
| ENSG00000144668 | ITGA9     |
| ENSG00000144724 | PTPRG     |
| ENSG00000144810 | COL8A1    |
| ENSG00000144857 | BOC       |
| ENSG00000144935 | TRPC1     |
| ENSG00000145147 | SLIT2     |
| ENSG00000145244 | CORIN     |
| ENSG00000145423 | SFRP2     |
| ENSG00000145431 | PDGFC     |
| ENSG00000145681 | HAPLN1    |
| ENSG00000145808 | ADAMTS19  |
| ENSG00000145826 | LECT2     |
| ENSG00000145882 | PCYOX1L   |
| ENSG00000146013 | GFRA3     |
| ENSG00000146072 | TNFRSF21  |

|                 |          |
|-----------------|----------|
| ENSG00000146374 | RSPO3    |
| ENSG00000147896 | IFNK     |
| ENSG00000148180 | GSN      |
| ENSG00000148204 | CRB2     |
| ENSG00000148386 | LCN9     |
| ENSG00000148926 | ADM      |
| ENSG00000148965 | SAA4     |
| ENSG00000149021 | SCGB1A1  |
| ENSG00000149131 | SERPING1 |
| ENSG00000149177 | PTPRJ    |
| ENSG00000149564 | ESAM     |
| ENSG00000149577 | SIDT2    |
| ENSG00000150275 | PCDH15   |
| ENSG00000150281 | CTF1     |
| ENSG00000150625 | GPM6A    |
| ENSG00000150637 | CD226    |
| ENSG00000150938 | CRIM1    |
| ENSG00000150995 | ITPR1    |
| ENSG00000151006 | PRSS53   |
| ENSG00000151033 | LYZL2    |
| ENSG00000151388 | ADAMTS12 |
| ENSG00000151468 | CCDC3    |
| ENSG00000151655 | ITIH2    |
| ENSG00000151746 | BICD1    |
| ENSG00000152402 | GUCY1A2  |
| ENSG00000152595 | MEPE     |
| ENSG00000152785 | BMP3     |
| ENSG00000153029 | MR1      |
| ENSG00000153162 | BMP6     |
| ENSG00000153246 | PLA2R1   |
| ENSG00000153283 | CD96     |
| ENSG00000153563 | CD8A     |
| ENSG00000153822 | KCNJ16   |
| ENSG00000154269 | ENPP3    |
| ENSG00000154721 | JAM2     |
| ENSG00000154764 | WNT7A    |
| ENSG00000155011 | DKK2     |
| ENSG00000155657 | TTN      |
| ENSG00000156076 | WIF1     |
| ENSG00000156140 | ADAMTS3  |
| ENSG00000156218 | ADAMTSL3 |
| ENSG00000156886 | ITGAD    |

|                 |          |
|-----------------|----------|
| ENSG00000157087 | ATP2B2   |
| ENSG00000157093 | LYZL4    |
| ENSG00000157168 | NRG1     |
| ENSG00000157193 | LRP8     |
| ENSG00000157350 | ST3GAL2  |
| ENSG00000157542 | KCNJ6    |
| ENSG00000157551 | KCNJ15   |
| ENSG00000157766 | ACAN     |
| ENSG00000157873 | TNFRSF14 |
| ENSG00000158406 | HIST1H4H |
| ENSG00000158714 | SLAMF8   |
| ENSG00000158813 | EDA      |
| ENSG00000158815 | FGF17    |
| ENSG00000158887 | MPZ      |
| ENSG00000158955 | WNT9B    |
| ENSG00000159166 | LAD1     |
| ENSG00000159167 | STC1     |
| ENSG00000159224 | GIP      |
| ENSG00000159307 | SCUBE1   |
| ENSG00000159792 | PSKH1    |
| ENSG00000160111 | CPAMD8   |
| ENSG00000160113 | NR2F6    |
| ENSG00000160145 | KALRN    |
| ENSG00000160161 | CILP2    |
| ENSG00000160180 | TFF3     |
| ENSG00000160181 | TFF2     |
| ENSG00000160182 | TFF1     |
| ENSG00000160323 | ADAMTS13 |
| ENSG00000160349 | LCN1     |
| ENSG00000160588 | MPZL3    |
| ENSG00000160593 | AMICA1   |
| ENSG00000160613 | PCSK7    |
| ENSG00000160856 | FCRL3    |
| ENSG00000160886 | LY6K     |
| ENSG00000160963 | COL26A1  |
| ENSG00000161249 | DMKN     |
| ENSG00000161634 | DCD      |
| ENSG00000161649 | CD300LG  |
| ENSG00000161921 | CXCL16   |
| ENSG00000161955 | TNFSF13  |
| ENSG00000162267 | ITIH3    |
| ENSG00000162490 | DRAXIN   |

|                 |          |
|-----------------|----------|
| ENSG00000162552 | WNT4     |
| ENSG00000162572 | SCNN1D   |
| ENSG00000162631 | NTNG1    |
| ENSG00000162687 | KCNT2    |
| ENSG00000162694 | EXTL2    |
| ENSG00000162706 | CADM3    |
| ENSG00000162729 | IGSF8    |
| ENSG00000162739 | SLAMF6   |
| ENSG00000162745 | OLFML2B  |
| ENSG00000162836 | ACP6     |
| ENSG00000162891 | IL20     |
| ENSG00000162892 | IL24     |
| ENSG00000162998 | FRZB     |
| ENSG00000163083 | INHBB    |
| ENSG00000163217 | BMP10    |
| ENSG00000163273 | NPPC     |
| ENSG00000163297 | ANTXR2   |
| ENSG00000163359 | COL6A3   |
| ENSG00000163389 | POGLUT1  |
| ENSG00000163479 | SSR2     |
| ENSG00000163501 | IHH      |
| ENSG00000163520 | FBLN2    |
| ENSG00000163534 | FCRL1    |
| ENSG00000163606 | CD200R1  |
| ENSG00000163638 | ADAMTS9  |
| ENSG00000163687 | DNASE1L3 |
| ENSG00000163710 | PCOLCE2  |
| ENSG00000163734 | CXCL3    |
| ENSG00000163735 | CXCL5    |
| ENSG00000163736 | PPBP     |
| ENSG00000163737 | PF4      |
| ENSG00000163902 | RPN1     |
| ENSG00000163956 | LRPAP1   |
| ENSG00000164050 | PLXNB1   |
| ENSG00000164161 | HHIP     |
| ENSG00000164176 | EDIL3    |
| ENSG00000164220 | F2RL2    |
| ENSG00000164265 | SCGB3A2  |
| ENSG00000164266 | SPINK1   |
| ENSG00000164307 | ERAP1    |
| ENSG00000164318 | EGFLAM   |
| ENSG00000164399 | IL3      |

|                 |           |
|-----------------|-----------|
| ENSG00000164485 | IL22RA2   |
| ENSG00000164530 | PI16      |
| ENSG00000164692 | COL1A2    |
| ENSG00000164761 | TNFRSF11B |
| ENSG00000164821 | DEFA4     |
| ENSG00000164822 | DEFA6     |
| ENSG00000164946 | FREM1     |
| ENSG00000165471 | MBL2      |
| ENSG00000165661 | QSOX2     |
| ENSG00000165953 | SERPINA12 |
| ENSG00000165973 | NELL1     |
| ENSG00000165995 | CACNB2    |
| ENSG00000166033 | HTRA1     |
| ENSG00000166035 | LIPC      |
| ENSG00000166090 | IL25      |
| ENSG00000166106 | ADAMTS15  |
| ENSG00000166145 | SPINT1    |
| ENSG00000166147 | FBN1      |
| ENSG00000166278 | C2        |
| ENSG00000166402 | TUB       |
| ENSG00000166535 | A2ML1     |
| ENSG00000166573 | GALR1     |
| ENSG00000166922 | SCG5      |
| ENSG00000166923 | GREM1     |
| ENSG00000167535 | CACNB3    |
| ENSG00000167633 | KIR3DL1   |
| ENSG00000167642 | SPINT2    |
| ENSG00000167711 | SERPINF2  |
| ENSG00000167749 | KLK4      |
| ENSG00000167751 | KLK2      |
| ENSG00000167754 | KLK5      |
| ENSG00000167755 | KLK6      |
| ENSG00000167772 | ANGPTL4   |
| ENSG00000168056 | LTBP3     |
| ENSG00000168477 | TNXB      |
| ENSG00000168484 | SFTPC     |
| ENSG00000168685 | IL7R      |
| ENSG00000168743 | NPNT      |
| ENSG00000168811 | IL12A     |
| ENSG00000168843 | FSTL5     |
| ENSG00000168928 | CTRB2     |
| ENSG00000169006 | NTSR2     |

|                 |          |
|-----------------|----------|
| ENSG00000169031 | COL4A3   |
| ENSG00000169231 | THBS3    |
| ENSG00000169242 | EFNA1    |
| ENSG00000169344 | UMOD     |
| ENSG00000169347 | GP2      |
| ENSG00000169393 | ELSPBP1  |
| ENSG00000169413 | RNASE6   |
| ENSG00000169550 | MUC15    |
| ENSG00000169605 | GKN1     |
| ENSG00000169752 | NRG4     |
| ENSG00000169814 | BTD      |
| ENSG00000169894 | MUC3A    |
| ENSG00000169896 | ITGAM    |
| ENSG00000170054 | SERPINA9 |
| ENSG00000170099 | SERPINA6 |
| ENSG00000170348 | TMED10   |
| ENSG00000170367 | CST5     |
| ENSG00000170369 | CST2     |
| ENSG00000170498 | KISS1    |
| ENSG00000170866 | LILRA3   |
| ENSG00000170927 | PKHD1    |
| ENSG00000170962 | PDGFD    |
| ENSG00000171102 | OBP2B    |
| ENSG00000171119 | NRTN     |
| ENSG00000171136 | RLN3     |
| ENSG00000171195 | MUC7     |
| ENSG00000171243 | SOSTDC1  |
| ENSG00000171435 | KSR2     |
| ENSG00000171502 | COL24A1  |
| ENSG00000171587 | DSCAM    |
| ENSG00000171812 | COL8A2   |
| ENSG00000171867 | PRNP     |
| ENSG00000171951 | SCG2     |
| ENSG00000172116 | CD8B     |
| ENSG00000172179 | PRL      |
| ENSG00000172260 | NEGR1    |
| ENSG00000172349 | IL16     |
| ENSG00000172458 | IL17D    |
| ENSG00000172543 | CTSW     |
| ENSG00000172638 | EFEMP2   |
| ENSG00000172724 | CCL19    |
| ENSG00000172987 | HPSE2    |

|                 |          |
|-----------------|----------|
| ENSG00000173157 | ADAMTS20 |
| ENSG00000173335 | CST9     |
| ENSG00000173432 | SAA1     |
| ENSG00000173531 | MST1     |
| ENSG00000174059 | CD34     |
| ENSG00000174343 | CHRNA9   |
| ENSG00000174348 | PODN     |
| ENSG00000174562 | KLK15    |
| ENSG00000174938 | SEZ6L2   |
| ENSG00000175189 | INHBC    |
| ENSG00000175336 | APOF     |
| ENSG00000175356 | SCUBE2   |
| ENSG00000175426 | PCSK1    |
| ENSG00000175785 | PRIMA1   |
| ENSG00000175868 | CALCB    |
| ENSG00000175874 | CREG2    |
| ENSG00000176435 | CLEC14A  |
| ENSG00000176697 | BDNF     |
| ENSG00000176919 | C8G      |
| ENSG00000177697 | CD151    |
| ENSG00000177807 | KCNJ10   |
| ENSG00000177830 | CHID1    |
| ENSG00000178031 | ADAMTSL1 |
| ENSG00000178096 | BOLA1    |
| ENSG00000178226 | PRSS36   |
| ENSG00000178538 | CA8      |
| ENSG00000179002 | TAS1R2   |
| ENSG00000179218 | CALR     |
| ENSG00000179399 | GPC5     |
| ENSG00000179639 | FCER1A   |
| ENSG00000179751 | SYCN     |
| ENSG00000179914 | ITLN1    |
| ENSG00000179915 | NRXN1    |
| ENSG00000180245 | RRH      |
| ENSG00000180875 | GREM2    |
| ENSG00000181027 | FKRP     |
| ENSG00000181036 | FCRL6    |
| ENSG00000181092 | ADIPOQ   |
| ENSG00000181195 | PENK     |
| ENSG00000181409 | AATK     |
| ENSG00000181523 | SGSH     |
| ENSG00000181562 | EDDM3A   |

|                 |         |
|-----------------|---------|
| ENSG00000181634 | TNFSF15 |
| ENSG00000182393 | IFNL1   |
| ENSG00000182545 | RNASE10 |
| ENSG00000182585 | EPGN    |
| ENSG00000182667 | NTM     |
| ENSG00000182752 | PAPPA   |
| ENSG00000182853 | VMO1    |
| ENSG00000182871 | COL18A1 |
| ENSG00000183098 | GPC6    |
| ENSG00000183378 | OVCH2   |
| ENSG00000183607 | GKN2    |
| ENSG00000183682 | BMP8A   |
| ENSG00000183691 | NOG     |
| ENSG00000183709 | IFNL2   |
| ENSG00000183715 | OPCML   |
| ENSG00000183844 | FAM3B   |
| ENSG00000183971 | NPW     |
| ENSG00000184164 | CRELD2  |
| ENSG00000184347 | SLIT3   |
| ENSG00000184349 | EFNA5   |
| ENSG00000184374 | COLEC10 |
| ENSG00000184408 | KCND2   |
| ENSG00000184459 | BPIFC   |
| ENSG00000184502 | GAST    |
| ENSG00000184599 | FAM19A3 |
| ENSG00000184709 | LRRC26  |
| ENSG00000184719 | RNLS    |
| ENSG00000184840 | TMED9   |
| ENSG00000185215 | TNFAIP2 |
| ENSG00000185245 | GP1BA   |
| ENSG00000185339 | TCN2    |
| ENSG00000185737 | NRG3    |
| ENSG00000185885 | IFITM1  |
| ENSG00000185896 | LAMP1   |
| ENSG00000186074 | CD300LF |
| ENSG00000186431 | FCAR    |
| ENSG00000186510 | CLCNKA  |
| ENSG00000186652 | PRG2    |
| ENSG00000186792 | HYAL3   |
| ENSG00000186895 | FGF3    |
| ENSG00000187094 | CCK     |
| ENSG00000187116 | LILRA5  |

|                 |          |
|-----------------|----------|
| ENSG00000187122 | SLIT1    |
| ENSG00000187123 | LYPD6    |
| ENSG00000187244 | BCAM     |
| ENSG00000187498 | COL4A1   |
| ENSG00000187664 | HAPLN4   |
| ENSG00000187720 | THSD4    |
| ENSG00000187764 | SEMA4D   |
| ENSG00000188064 | WNT7B    |
| ENSG00000188076 | SCGB1C1  |
| ENSG00000188107 | EYS      |
| ENSG00000188157 | AGRN     |
| ENSG00000188334 | BSPH1    |
| ENSG00000188372 | ZP3      |
| ENSG00000188488 | SERPINA5 |
| ENSG00000188508 | KRTDAP   |
| ENSG00000188517 | COL25A1  |
| ENSG00000188655 | RNASE9   |
| ENSG00000188672 | RHCE     |
| ENSG00000188710 | QRFP     |
| ENSG00000188729 | OSTN     |
| ENSG00000188763 | FZD9     |
| ENSG00000188770 | OPTC     |
| ENSG00000188783 | PRELP    |
| ENSG00000188958 | UTS2B    |
| ENSG00000188987 | HIST1H4D |
| ENSG00000189001 | SBSN     |
| ENSG00000189056 | RELN     |
| ENSG00000189068 | VSTM1    |
| ENSG00000189403 | HMGB1    |
| ENSG00000189430 | NCR1     |
| ENSG00000196083 | IL1RAP   |
| ENSG00000196104 | SPOCK3   |
| ENSG00000196136 | SERPINA3 |
| ENSG00000196176 | HIST1H4A |
| ENSG00000196260 | SFTA2    |
| ENSG00000196296 | ATP2A1   |
| ENSG00000196739 | COL27A1  |
| ENSG00000196924 | FLNA     |
| ENSG00000196937 | FAM3C    |
| ENSG00000196966 | HIST1H3E |
| ENSG00000197061 | HIST1H4C |
| ENSG00000197081 | IGF2R    |

|                 |           |
|-----------------|-----------|
| ENSG00000197110 | IFNL3     |
| ENSG00000197249 | SERPINA1  |
| ENSG00000197272 | IL27      |
| ENSG00000197409 | HIST1H3D  |
| ENSG00000197467 | COL13A1   |
| ENSG00000197586 | ENTPD6    |
| ENSG00000197594 | ENPP1     |
| ENSG00000197721 | CR1L      |
| ENSG00000197745 | SCGB1D4   |
| ENSG00000197746 | PSAP      |
| ENSG00000198053 | SIRPA     |
| ENSG00000198055 | GRK6      |
| ENSG00000198327 | HIST1H4F  |
| ENSG00000198339 | HIST1H4I  |
| ENSG00000198366 | HIST1H3A  |
| ENSG00000198518 | HIST1H4E  |
| ENSG00000198670 | LPA       |
| ENSG00000198732 | SMOC1     |
| ENSG00000198821 | CD247     |
| ENSG00000198898 | CAPZA2    |
| ENSG00000203710 | CR1       |
| ENSG00000203747 | FCGR3A    |
| ENSG00000204248 | COL11A2   |
| ENSG00000204301 | NOTCH4    |
| ENSG00000204305 | AGER      |
| ENSG00000204386 | NEU1      |
| ENSG00000204414 | CSHL1     |
| ENSG00000204420 | C6orf25   |
| ENSG00000204444 | APOM      |
| ENSG00000204475 | NCR3      |
| ENSG00000204525 | HLA-C     |
| ENSG00000204542 | C6orf15   |
| ENSG00000204632 | HLA-G     |
| ENSG00000204671 | IL31      |
| ENSG00000204969 | PCDHA2    |
| ENSG00000205403 | CFI       |
| ENSG00000205542 | TMSB4X    |
| ENSG00000205809 | KLRC2     |
| ENSG00000205863 | C1QTNF9B  |
| ENSG00000206047 | DEFA1     |
| ENSG00000211639 | IGLV4-60  |
| ENSG00000211641 | IGLV11-55 |

|                 |             |
|-----------------|-------------|
| ENSG00000211896 | IGHG1       |
| ENSG00000211897 | IGHG3       |
| ENSG00000213088 | DARC        |
| ENSG00000213218 | CSH2        |
| ENSG00000213398 | LCAT        |
| ENSG00000213809 | KLRK1       |
| ENSG00000213892 | CEACAM16    |
| ENSG00000213918 | DNASE1      |
| ENSG00000213927 | CCL27       |
| ENSG00000213949 | ITGA1       |
| ENSG00000215018 | COL28A1     |
| ENSG00000215704 | CELA2B      |
| ENSG00000215788 | TNFRSF25    |
| ENSG00000215853 | RPTN        |
| ENSG00000216490 | IFI30       |
| ENSG00000219438 | FAM19A5     |
| ENSG00000221957 | KIR2DS4     |
| ENSG00000223865 | HLA-DPB1    |
| ENSG00000223953 | C1QTNF5     |
| ENSG00000224916 | APOC4-APOC2 |
| ENSG00000228278 | ORM2        |
| ENSG00000229314 | ORM1        |
| ENSG00000231389 | HLA-DPA1    |
| ENSG00000234745 | HLA-B       |
| ENSG00000234906 | APOC2       |
| ENSG00000237541 | HLA-DQA2    |
| ENSG00000239839 | DEFA3       |
| ENSG00000239961 | LILRA4      |
| ENSG00000240247 | DEFA1B      |
| ENSG00000240403 | KIR3DL2     |
| ENSG00000240505 | TNFRSF13B   |
| ENSG00000240583 | AQP1        |
| ENSG00000241106 | HLA-DOB     |
| ENSG00000241404 | EGFL8       |
| ENSG00000242689 | CNTF        |
| ENSG00000243509 | TNFRSF6B    |
| ENSG00000243649 | CFB         |
| ENSG00000244414 | CFHR1       |
| ENSG00000244482 | LILRA6      |
| ENSG00000244682 | FCGR2C      |
| ENSG00000244731 | C4A         |
| ENSG00000248099 | INSL3       |

|                 |          |
|-----------------|----------|
| ENSG00000253117 | OC90     |
| ENSG00000254647 | INS      |
| ENSG00000257017 | HP       |
| ENSG00000258417 |          |
| ENSG00000259384 | GH1      |
| ENSG00000261857 | MIA      |
| ENSG00000001617 | SEMA3F   |
| ENSG00000002586 | CD99     |
| ENSG00000002587 | HS3ST1   |
| ENSG00000003096 | KLHL13   |
| ENSG00000003137 | CYP26B1  |
| ENSG00000005001 | PRSS2    |
| ENSG00000005884 | ITGA3    |
| ENSG00000005893 | LAMP2    |
| ENSG00000006074 | CCL18    |
| ENSG00000006075 | CCL3     |
| ENSG00000006116 | CACNG3   |
| ENSG00000006128 | TAC1     |
| ENSG00000006210 | CX3CL1   |
| ENSG00000006534 | ALDH3B1  |
| ENSG00000006606 | CCL26    |
| ENSG00000007306 | CEACAM7  |
| ENSG00000008300 | CELSR3   |
| ENSG00000008438 | PGLYRP1  |
| ENSG00000008513 | ST3GAL1  |
| ENSG00000009413 | REV3L    |
| ENSG00000011201 | KAL1     |
| ENSG00000011465 | DCN      |
| ENSG00000013583 | HEBP1    |
| ENSG00000016402 | IL20RA   |
| ENSG00000017260 | ATP2C1   |
| ENSG00000021355 | SERPINB1 |
| ENSG00000021852 | C8B      |
| ENSG00000026559 | KCNG1    |
| ENSG00000026950 | BTN3A1   |
| ENSG00000028137 | TNFRSF1B |
| ENSG00000034971 | MYOC     |
| ENSG00000035403 | VCL      |
| ENSG00000037042 | TUBG2    |
| ENSG00000038295 | TLL1     |
| ENSG00000038382 | TRIO     |
| ENSG00000038945 | MSR1     |

|                 |          |
|-----------------|----------|
| ENSG00000041357 | PSMA4    |
| ENSG00000044012 | GUCA2B   |
| ENSG00000048392 | RRM2B    |
| ENSG00000049089 | COL9A2   |
| ENSG00000049239 | H6PD     |
| ENSG00000049540 | ELN      |
| ENSG00000054219 | LY75     |
| ENSG00000054277 | OPN3     |
| ENSG00000054356 | PTPRN    |
| ENSG00000054803 | CBLN4    |
| ENSG00000054938 | CHRDL2   |
| ENSG00000054967 | RELT     |
| ENSG00000056736 | IL17RB   |
| ENSG00000057149 | SERPINB3 |
| ENSG00000060140 | STYK1    |
| ENSG00000063127 | SLC6A16  |
| ENSG00000063180 | CA11     |
| ENSG00000063660 | GPC1     |
| ENSG00000064270 | ATP2C2   |
| ENSG00000064886 | CHI3L2   |
| ENSG00000065978 | YBX1     |
| ENSG00000066294 | CD84     |
| ENSG00000067191 | CACNB1   |
| ENSG00000069018 | TRPC7    |
| ENSG00000069020 | MAST4    |
| ENSG00000069482 | GAL      |
| ENSG00000069849 | ATP1B3   |
| ENSG00000070214 | SLC44A1  |
| ENSG00000070388 | FGF22    |
| ENSG00000070404 | FSTL3    |
| ENSG00000070729 | CNGB1    |
| ENSG00000070985 | TRPM5    |
| ENSG00000071246 | VASH1    |
| ENSG00000071282 | LMCD1    |
| ENSG00000072041 | SLC6A15  |
| ENSG00000072080 | SPP2     |
| ENSG00000072195 | SPEG     |
| ENSG00000072571 | HMMR     |
| ENSG00000073067 | CYP2W1   |
| ENSG00000073464 | CLCN4    |
| ENSG00000074181 | NOTCH3   |
| ENSG00000074621 | SLC24A1  |

|                 |           |
|-----------------|-----------|
| ENSG00000074695 | LMAN1     |
| ENSG00000074842 | C19orf10  |
| ENSG00000074935 | TUBE1     |
| ENSG00000075275 | CELSR1    |
| ENSG00000075290 | WNT8B     |
| ENSG00000075429 | CACNG5    |
| ENSG00000075461 | CACNG4    |
| ENSG00000075886 | TUBA3D    |
| ENSG00000076321 | KLHL20    |
| ENSG00000076716 | GPC4      |
| ENSG00000077522 | ACTN2     |
| ENSG00000077800 | FKBP6     |
| ENSG00000077984 | CST7      |
| ENSG00000078246 | TULP3     |
| ENSG00000078401 | EDN1      |
| ENSG00000078579 | FGF20     |
| ENSG00000078589 | P2RY10    |
| ENSG00000078795 | PKD2L2    |
| ENSG00000078898 | BPIFB2    |
| ENSG00000079101 | CLUL1     |
| ENSG00000079150 | FKBP7     |
| ENSG00000079385 | CEACAM1   |
| ENSG00000080166 | DCT       |
| ENSG00000080573 | COL5A3    |
| ENSG00000080823 | MOK       |
| ENSG00000081148 | IMPG2     |
| ENSG00000081985 | IL12RB2   |
| ENSG00000082293 | COL19A1   |
| ENSG00000083067 | TRPM3     |
| ENSG00000083454 | P2RX5     |
| ENSG00000083782 | EPYC      |
| ENSG00000083857 | FAT1      |
| ENSG00000084636 | COL16A1   |
| ENSG00000085063 | CD59      |
| ENSG00000085265 | FCN1      |
| ENSG00000085465 | OVGP1     |
| ENSG00000086015 | MAST2     |
| ENSG00000087128 | TMPRSS11E |
| ENSG00000087916 | SLC6A14   |
| ENSG00000088812 | ATRN      |
| ENSG00000088827 | SIGLEC1   |
| ENSG00000089472 | HEPH      |

|                 |          |
|-----------------|----------|
| ENSG00000089558 | KCNH4    |
| ENSG00000089692 | LAG3     |
| ENSG00000090006 | LTBP4    |
| ENSG00000090382 | LYZ      |
| ENSG00000090520 | DNAJB11  |
| ENSG00000090581 | GNPTG    |
| ENSG00000090659 | CD209    |
| ENSG00000090674 | MCOLN1   |
| ENSG00000090776 | EFNB1    |
| ENSG00000090920 | FCGBP    |
| ENSG00000093072 | CECR1    |
| ENSG00000094755 | GABRP    |
| ENSG00000095739 | BAMBI    |
| ENSG00000095917 | TPSD1    |
| ENSG00000095981 | KCNK16   |
| ENSG00000096006 | CRISP3   |
| ENSG00000096070 | BRPF3    |
| ENSG00000096088 | PGC      |
| ENSG00000096433 | ITPR3    |
| ENSG00000099203 | TMED1    |
| ENSG00000099337 | KCNK6    |
| ENSG00000099377 | HSD3B7   |
| ENSG00000099721 | AMELY    |
| ENSG00000099822 | HCN2     |
| ENSG00000099910 | KLHL22   |
| ENSG00000099937 | SERPIND1 |
| ENSG00000099940 | SNAP29   |
| ENSG00000099953 | MMP11    |
| ENSG00000099957 | P2RX6    |
| ENSG00000099985 | OSM      |
| ENSG00000099998 | GGT5     |
| ENSG00000100023 | PPIL2    |
| ENSG00000100077 | ADRBK2   |
| ENSG00000100078 | PLA2G3   |
| ENSG00000100097 | LGALS1   |
| ENSG00000100121 | GGTLC2   |
| ENSG00000100234 | TIMP3    |
| ENSG00000100373 | UPK3A    |
| ENSG00000100399 | CHADL    |
| ENSG00000100442 | FKBP3    |
| ENSG00000100473 | COCH     |
| ENSG00000100567 | PSMA3    |

|                 |        |
|-----------------|--------|
| ENSG00000100600 | LGMN   |
| ENSG00000100604 | CHGA   |
| ENSG00000100902 | PSMA6  |
| ENSG00000101144 | BMP7   |
| ENSG00000101182 | PSMA7  |
| ENSG00000101200 | AVP    |
| ENSG00000101255 | TRIB3  |
| ENSG00000101282 | RSPO4  |
| ENSG00000101292 | PROKR2 |
| ENSG00000101405 | OXT    |
| ENSG00000101440 | ASIP   |
| ENSG00000101441 | CST4   |
| ENSG00000101890 | GUCY2F |
| ENSG00000102057 | KCND1  |
| ENSG00000102076 | OPN1LW |
| ENSG00000102104 | RS1    |
| ENSG00000102109 | PCSK1N |
| ENSG00000102265 | TIMP1  |
| ENSG00000102271 | KLHL4  |
| ENSG00000102287 | GABRE  |
| ENSG00000102313 | ITIH6  |
| ENSG00000102359 | SRPX2  |
| ENSG00000102837 | OLFM4  |
| ENSG00000102924 | CBLN1  |
| ENSG00000102962 | CCL22  |
| ENSG00000102970 | CCL17  |
| ENSG00000103023 | PRSS54 |
| ENSG00000103310 | ZP2    |
| ENSG00000103355 | PRSS33 |
| ENSG00000103489 | XYLT1  |
| ENSG00000104213 | PDGFRL |
| ENSG00000104290 | FZD3   |
| ENSG00000104371 | DKK4   |
| ENSG00000104804 | TULP2  |
| ENSG00000104805 | NUCB1  |
| ENSG00000104818 | CGB2   |
| ENSG00000104826 | LHB    |
| ENSG00000104827 | CGB    |
| ENSG00000104848 | KCNA7  |
| ENSG00000104938 | CLEC4M |
| ENSG00000104951 | IL4I1  |
| ENSG00000104972 | LILRB1 |

|                 |          |
|-----------------|----------|
| ENSG00000104974 | LILRA1   |
| ENSG00000105220 | GPI      |
| ENSG00000105246 | EBI3     |
| ENSG00000105290 | APLP1    |
| ENSG00000105366 | SIGLEC8  |
| ENSG00000105369 | CD79A    |
| ENSG00000105472 | CLEC11A  |
| ENSG00000105605 | CACNG7   |
| ENSG00000105664 | COMP     |
| ENSG00000105701 | FKBP8    |
| ENSG00000105855 | ITGB8    |
| ENSG00000105894 | PTN      |
| ENSG00000105954 | NPVF     |
| ENSG00000106089 | STX1A    |
| ENSG00000106113 | CRHR2    |
| ENSG00000106178 | CCL24    |
| ENSG00000106236 | NPTX2    |
| ENSG00000106278 | PTPRZ1   |
| ENSG00000106304 | SPAM1    |
| ENSG00000106541 | AGR2     |
| ENSG00000106588 | PSMA2    |
| ENSG00000106714 | CNTNAP3  |
| ENSG00000106809 | OGN      |
| ENSG00000106819 | ASPN     |
| ENSG00000106823 | ECM2     |
| ENSG00000106927 | AMBP     |
| ENSG00000106952 | TNFSF8   |
| ENSG00000107014 | RLN2     |
| ENSG00000107018 | RLN1     |
| ENSG00000107147 | KCNT1    |
| ENSG00000107618 | RBP3     |
| ENSG00000107623 | GDF10    |
| ENSG00000107821 | KAZALD1  |
| ENSG00000107831 | FGF8     |
| ENSG00000108055 | SMC3     |
| ENSG00000108231 | LG11     |
| ENSG00000108294 | PSMB3    |
| ENSG00000108423 | TUBD1    |
| ENSG00000108622 | ICAM2    |
| ENSG00000108679 | LGALS3BP |
| ENSG00000108700 | CCL8     |
| ENSG00000108702 | CCL1     |

|                 |         |
|-----------------|---------|
| ENSG00000108784 | NAGLU   |
| ENSG00000108878 | CACNG1  |
| ENSG00000108950 | FAM20A  |
| ENSG00000109205 | ODAM    |
| ENSG00000109208 | SMR3A   |
| ENSG00000109272 | PF4V1   |
| ENSG00000109466 | KLHL2   |
| ENSG00000109572 | CLCN3   |
| ENSG00000109625 | CPZ     |
| ENSG00000109738 | GLRB    |
| ENSG00000109790 | KLHL5   |
| ENSG00000109927 | TECTA   |
| ENSG00000109943 | CRTAM   |
| ENSG00000110169 | HPX     |
| ENSG00000110203 | FOLR3   |
| ENSG00000110400 | PVRL1   |
| ENSG00000110651 | CD81    |
| ENSG00000111181 | SLC6A12 |
| ENSG00000111215 | PRR4    |
| ENSG00000111241 | FGF6    |
| ENSG00000111262 | KCNA1   |
| ENSG00000111339 | ART4    |
| ENSG00000111341 | MGP     |
| ENSG00000111405 | ENDOU   |
| ENSG00000111644 | ACRBP   |
| ENSG00000111796 | KLRB1   |
| ENSG00000111799 | COL12A1 |
| ENSG00000112077 | RHAG    |
| ENSG00000112175 | BMP5    |
| ENSG00000112218 | GPR63   |
| ENSG00000112280 | COL9A1  |
| ENSG00000112333 | NR2E1   |
| ENSG00000112655 | PTK7    |
| ENSG00000112706 | IMPG1   |
| ENSG00000112761 | WISP3   |
| ENSG00000112796 | ENPP5   |
| ENSG00000112818 | MEP1A   |
| ENSG00000112851 | ERBB2IP |
| ENSG00000112936 | C7      |
| ENSG00000113083 | LOX     |
| ENSG00000113088 | GZMK    |
| ENSG00000113140 | SPARC   |

|                 |          |
|-----------------|----------|
| ENSG00000113141 | IK       |
| ENSG00000113296 | THBS4    |
| ENSG00000113303 | BTNL8    |
| ENSG00000113504 | SLC12A7  |
| ENSG00000113593 | PPWD1    |
| ENSG00000114204 | SERPINI2 |
| ENSG00000114270 | COL7A1   |
| ENSG00000114646 | CSPG5    |
| ENSG00000114648 | KLHL18   |
| ENSG00000114796 | KLHL24   |
| ENSG00000114923 | SLC4A3   |
| ENSG00000114948 | ADAM23   |
| ENSG00000115216 | NRBP1    |
| ENSG00000115318 | LOXL3    |
| ENSG00000115386 | REG1A    |
| ENSG00000115474 | KCNJ13   |
| ENSG00000115523 | GNLY     |
| ENSG00000115598 | IL1RL2   |
| ENSG00000116005 | PCYOX1   |
| ENSG00000116031 | CD207    |
| ENSG00000116194 | ANGPTL1  |
| ENSG00000116260 | QSOX1    |
| ENSG00000116396 | KCNC4    |
| ENSG00000116679 | IVNS1ABP |
| ENSG00000116690 | PRG4     |
| ENSG00000116774 | OLFML3   |
| ENSG00000116977 | LGALS8   |
| ENSG00000116985 | BMP8B    |
| ENSG00000117151 | CTBS     |
| ENSG00000117153 | KLHL12   |
| ENSG00000117385 | LEPRE1   |
| ENSG00000117407 | ARTN     |
| ENSG00000117560 | FASLG    |
| ENSG00000117691 | NENF     |
| ENSG00000117862 | TXNDC12  |
| ENSG00000117983 | MUC5B    |
| ENSG00000118640 | VAMP8    |
| ENSG00000118702 | GHRH     |
| ENSG00000118733 | OLFM3    |
| ENSG00000118972 | FGF23    |
| ENSG00000119147 | C2orf40  |
| ENSG00000119321 | FKBP15   |

|                 |         |
|-----------------|---------|
| ENSG00000119508 | NR4A3   |
| ENSG00000119537 | KDSR    |
| ENSG00000119714 | GPR68   |
| ENSG00000119737 | GPR75   |
| ENSG00000119771 | KLHL29  |
| ENSG00000119913 | TECTB   |
| ENSG00000119973 | PRLHR   |
| ENSG00000120057 | SFRP5   |
| ENSG00000120324 | PCDHB10 |
| ENSG00000120436 | GPR31   |
| ENSG00000120539 | MASTL   |
| ENSG00000120563 | LYZL1   |
| ENSG00000120586 | MRC1    |
| ENSG00000120694 | HSPH1   |
| ENSG00000120696 | KBTBD7  |
| ENSG00000120708 | TGFBI   |
| ENSG00000120798 | NR2C1   |
| ENSG00000121053 | EPX     |
| ENSG00000121101 | TEX14   |
| ENSG00000121410 | A1BG    |
| ENSG00000121797 | CCRL2   |
| ENSG00000121898 | CPXM2   |
| ENSG00000122133 | PAEP    |
| ENSG00000122136 | OBP2A   |
| ENSG00000122176 | FMOD    |
| ENSG00000122218 | COPA    |
| ENSG00000122375 | OPN4    |
| ENSG00000122550 | KLHL7   |
| ENSG00000122585 | NPY     |
| ENSG00000122642 | FKBP9   |
| ENSG00000122679 | RAMP3   |
| ENSG00000122756 | CNTRF   |
| ENSG00000122852 | SFTPA1  |
| ENSG00000122862 | SRGN    |
| ENSG00000122884 | P4HA1   |
| ENSG00000123104 | ITPR2   |
| ENSG00000123131 | PRDX4   |
| ENSG00000123146 | CD97    |
| ENSG00000123342 | MMP19   |
| ENSG00000123496 | IL13RA2 |
| ENSG00000123500 | COL10A1 |
| ENSG00000123560 | PLP1    |

|                 |          |
|-----------------|----------|
| ENSG00000123572 | NRK      |
| ENSG00000123612 | ACVR1C   |
| ENSG00000123901 | GPR83    |
| ENSG00000123999 | INHA     |
| ENSG00000124102 | PI3      |
| ENSG00000124107 | SLPI     |
| ENSG00000124134 | KCNS1    |
| ENSG00000124157 | SEMG2    |
| ENSG00000124205 | EDN3     |
| ENSG00000124233 | SEMG1    |
| ENSG00000124249 | KCNK15   |
| ENSG00000124333 | VAMP7    |
| ENSG00000124334 | IL9R     |
| ENSG00000124391 | IL17C    |
| ENSG00000124469 | CEACAM8  |
| ENSG00000124479 | NDP      |
| ENSG00000124490 | CRISP2   |
| ENSG00000124570 | SERPINB6 |
| ENSG00000124749 | COL21A1  |
| ENSG00000124780 | KCNK17   |
| ENSG00000124812 | CRISP1   |
| ENSG00000124818 | OPN5     |
| ENSG00000124875 | CXCL6    |
| ENSG00000124935 | SCGB1D2  |
| ENSG00000124939 | SCGB2A1  |
| ENSG00000125084 | WNT1     |
| ENSG00000125245 | GPR18    |
| ENSG00000125363 | AMELX    |
| ENSG00000125522 | NPBWR2   |
| ENSG00000125650 | PSPN     |
| ENSG00000125703 | ATG4C    |
| ENSG00000125787 | GNRH2    |
| ENSG00000125815 | CST8     |
| ENSG00000125861 | GFRA4    |
| ENSG00000125879 | OTOR     |
| ENSG00000125999 | BPIFB1   |
| ENSG00000126010 | GRPR     |
| ENSG00000126016 | AMOT     |
| ENSG00000126233 | SLURP1   |
| ENSG00000126251 | GPR42    |
| ENSG00000126259 | KIRREL2  |
| ENSG00000126500 | FLRT1    |

|                 |         |
|-----------------|---------|
| ENSG00000126545 | CSN1S1  |
| ENSG00000126549 | STATH   |
| ENSG00000126550 | HTN1    |
| ENSG00000126562 | WNK4    |
| ENSG00000126759 | CFP     |
| ENSG00000126861 | OMG     |
| ENSG00000127083 | OMD     |
| ENSG00000127129 | EDN2    |
| ENSG00000127241 | MASP1   |
| ENSG00000127412 | TRPV5   |
| ENSG00000127507 | EMR2    |
| ENSG00000127533 | F2RL3   |
| ENSG00000127824 | TUBA4A  |
| ENSG00000127951 | FGL2    |
| ENSG00000128040 | SPINK2  |
| ENSG00000128510 | CPA4    |
| ENSG00000128519 | TAS2R16 |
| ENSG00000128594 | LRRC4   |
| ENSG00000128595 | CALU    |
| ENSG00000128606 | LRRC17  |
| ENSG00000128617 | OPN1SW  |
| ENSG00000128802 | GDF2    |
| ENSG00000128881 | TTBK2   |
| ENSG00000129048 | ACKR4   |
| ENSG00000129084 | PSMA1   |
| ENSG00000129159 | KCNC1   |
| ENSG00000129244 | ATP1B2  |
| ENSG00000129270 | MMP28   |
| ENSG00000129277 | CCL4    |
| ENSG00000129437 | KLK14   |
| ENSG00000129451 | KLK10   |
| ENSG00000129455 | KLK8    |
| ENSG00000129465 | RIPK3   |
| ENSG00000129744 | ART1    |
| ENSG00000129749 | CHRNA10 |
| ENSG00000130175 | PRKCSH  |
| ENSG00000130226 | DPP6    |
| ENSG00000130283 | GDF1    |
| ENSG00000130303 | BST2    |
| ENSG00000130368 | MAS1    |
| ENSG00000130385 | BMP15   |
| ENSG00000130402 | ACTN4   |

|                 |         |
|-----------------|---------|
| ENSG00000130433 | CACNG6  |
| ENSG00000130528 | HRC     |
| ENSG00000130529 | TRPM4   |
| ENSG00000130768 | SMPDL3B |
| ENSG00000130822 | PNCK    |
| ENSG00000130956 | HABP4   |
| ENSG00000131013 | PPIL4   |
| ENSG00000131050 | BPIFA2  |
| ENSG00000131067 | GGT7    |
| ENSG00000131068 | DEFB118 |
| ENSG00000131094 | C1QL1   |
| ENSG00000131126 | TEX101  |
| ENSG00000131142 | CCL25   |
| ENSG00000131238 | PPT1    |
| ENSG00000131355 | EMR3    |
| ENSG00000131398 | KCNC3   |
| ENSG00000131409 | LRRC4B  |
| ENSG00000131462 | TUBG1   |
| ENSG00000131477 | RAMP2   |
| ENSG00000131724 | IL13RA1 |
| ENSG00000131808 | FSHB    |
| ENSG00000131910 | NR0B2   |
| ENSG00000132000 | PODNL1  |
| ENSG00000132182 | NUP210  |
| ENSG00000132185 | FCRLA   |
| ENSG00000132259 | CNGA4   |
| ENSG00000132464 | ENAM    |
| ENSG00000132465 | IGJ     |
| ENSG00000132470 | ITGB4   |
| ENSG00000132475 | H3F3B   |
| ENSG00000132514 | CLEC10A |
| ENSG00000132518 | GUCY2D  |
| ENSG00000132581 | SDF2    |
| ENSG00000132692 | BCAN    |
| ENSG00000132702 | HAPLN2  |
| ENSG00000132703 | APCS    |
| ENSG00000132911 | NMUR2   |
| ENSG00000132975 | GPR12   |
| ENSG00000133067 | LGR6    |
| ENSG00000133105 | RXFP2   |
| ENSG00000133110 | POSTN   |
| ENSG00000133116 | KL      |

|                 |          |
|-----------------|----------|
| ENSG00000133256 | PDE6B    |
| ENSG00000133318 | RTN3     |
| ENSG00000133475 | GGT2     |
| ENSG00000133636 | NTS      |
| ENSG00000133710 | SPINK5   |
| ENSG00000133872 | TMEM66   |
| ENSG00000134013 | LOXL2    |
| ENSG00000134028 | ADAMDEC1 |
| ENSG00000134070 | IRAK2    |
| ENSG00000134193 | REG4     |
| ENSG00000134200 | TSHB     |
| ENSG00000134245 | WNT2B    |
| ENSG00000134256 | CD101    |
| ENSG00000134285 | FKBP11   |
| ENSG00000134363 | FST      |
| ENSG00000134398 | ERN2     |
| ENSG00000134443 | GRP      |
| ENSG00000134539 | KLRD1    |
| ENSG00000134548 | C12orf39 |
| ENSG00000134551 | PRH2     |
| ENSG00000134830 | C5AR2    |
| ENSG00000135222 | CSN2     |
| ENSG00000135245 | HILPDA   |
| ENSG00000135346 | CGA      |
| ENSG00000135409 | AMHR2    |
| ENSG00000135414 | GDF11    |
| ENSG00000135519 | KCNH3    |
| ENSG00000135569 | TAAR5    |
| ENSG00000135617 | PRADC1   |
| ENSG00000135677 | GNS      |
| ENSG00000135686 | KLHL36   |
| ENSG00000135744 | AGT      |
| ENSG00000135919 | SERPINE2 |
| ENSG00000135973 | GPR45    |
| ENSG00000136010 | ALDH1L2  |
| ENSG00000136021 | SCYL2    |
| ENSG00000136040 | PLXNC1   |
| ENSG00000136052 | SLC41A2  |
| ENSG00000136110 | LECT1    |
| ENSG00000136114 | THSD1    |
| ENSG00000136156 | ITM2B    |
| ENSG00000136698 | CFC1     |

|                 |          |
|-----------------|----------|
| ENSG00000136731 | UGGT1    |
| ENSG00000136732 | GYPC     |
| ENSG00000136834 | OR1J1    |
| ENSG00000136859 | ANGPTL2  |
| ENSG00000136930 | PSMB7    |
| ENSG00000136986 | DERL1    |
| ENSG00000137076 | TLN1     |
| ENSG00000137080 | IFNA21   |
| ENSG00000137101 | CD72     |
| ENSG00000137274 | BPHL     |
| ENSG00000137392 | CLPS     |
| ENSG00000137440 | FGFBP1   |
| ENSG00000137462 | TLR2     |
| ENSG00000137496 | IL18BP   |
| ENSG00000137558 | PI15     |
| ENSG00000137672 | TRPC6    |
| ENSG00000137731 | FXVD2    |
| ENSG00000138028 | CGREF1   |
| ENSG00000138080 | EMILIN1  |
| ENSG00000138085 | ATRAID   |
| ENSG00000138185 | ENTPD1   |
| ENSG00000138271 | GPR87    |
| ENSG00000138308 | PLA2G12B |
| ENSG00000138615 | CILP     |
| ENSG00000138741 | TRPC3    |
| ENSG00000139053 | PDE6H    |
| ENSG00000139178 | C1RL     |
| ENSG00000139263 | LRIG3    |
| ENSG00000139292 | LGR5     |
| ENSG00000139540 | SLC39A5  |
| ENSG00000139572 | GPR84    |
| ENSG00000139679 | LPAR6    |
| ENSG00000139908 | TSSK4    |
| ENSG00000140015 | KCNH5    |
| ENSG00000140030 | GPR65    |
| ENSG00000140199 | SLC12A6  |
| ENSG00000140259 | MFAP1    |
| ENSG00000140598 | EFTUD1   |
| ENSG00000141096 | DPEP3    |
| ENSG00000141194 | OR4D1    |
| ENSG00000141316 | SPACA3   |
| ENSG00000141337 | ARSG     |

|                 |          |
|-----------------|----------|
| ENSG00000141424 | SLC39A6  |
| ENSG00000141429 | GALNT1   |
| ENSG00000141434 | MEP1B    |
| ENSG00000141574 | SECTM1   |
| ENSG00000141639 | MAPK4    |
| ENSG00000141756 | FKBP10   |
| ENSG00000141858 | SAMD1    |
| ENSG00000142173 | COL6A2   |
| ENSG00000142185 | TRPM2    |
| ENSG00000142235 | LMTK3    |
| ENSG00000142408 | CACNG8   |
| ENSG00000142449 | FBN3     |
| ENSG00000142507 | PSMB6    |
| ENSG00000142511 | GPR32    |
| ENSG00000142512 | SIGLEC10 |
| ENSG00000142538 | PTH2     |
| ENSG00000142748 | FCN3     |
| ENSG00000142798 | HSPG2    |
| ENSG00000142871 | CYR61    |
| ENSG00000142892 | PIGK     |
| ENSG00000142910 | TINAGL1  |
| ENSG00000143105 | KCNA10   |
| ENSG00000143106 | PSMA5    |
| ENSG00000143126 | CELSR2   |
| ENSG00000143127 | ITGA10   |
| ENSG00000143147 | GPR161   |
| ENSG00000143153 | ATP1B1   |
| ENSG00000143162 | CREG1    |
| ENSG00000143184 | XCL1     |
| ENSG00000143185 | XCL2     |
| ENSG00000143341 | HMCN1    |
| ENSG00000143367 | TUFT1    |
| ENSG00000143369 | ECM1     |
| ENSG00000143382 | ADAMTSL4 |
| ENSG00000143473 | KCNH1    |
| ENSG00000143546 | S100A8   |
| ENSG00000143630 | HCN3     |
| ENSG00000143674 |          |
| ENSG00000143768 | LEFTY2   |
| ENSG00000143816 | WNT9A    |
| ENSG00000143954 | REG3G    |
| ENSG00000144115 | THNSL2   |

|                 |          |
|-----------------|----------|
| ENSG00000144119 | C1QL2    |
| ENSG00000144152 | FBLN7    |
| ENSG00000144191 | CNGA3    |
| ENSG00000144214 | LYG1     |
| ENSG00000144381 | HSPD1    |
| ENSG00000144452 | ABCA12   |
| ENSG00000144648 | ACKR2    |
| ENSG00000144847 | IGSF11   |
| ENSG00000144908 | ALDH1L1  |
| ENSG00000145040 | UCN2     |
| ENSG00000145050 | MANF     |
| ENSG00000145113 | MUC4     |
| ENSG00000145192 | AHSG     |
| ENSG00000145332 | KLHL8    |
| ENSG00000145476 | CYP4V2   |
| ENSG00000145536 | ADAMTS16 |
| ENSG00000145649 | GZMA     |
| ENSG00000145708 | CRHBP    |
| ENSG00000145824 | CXCL14   |
| ENSG00000146021 | KLHL3    |
| ENSG00000146197 | SCUBE3   |
| ENSG00000146216 | TTBK1    |
| ENSG00000146360 | GPR6     |
| ENSG00000146378 | TAAR2    |
| ENSG00000146383 | TAAR6    |
| ENSG00000146385 | TAAR8    |
| ENSG00000146469 | VIP      |
| ENSG00000146828 | SLC12A9  |
| ENSG00000146938 | NLGN4X   |
| ENSG00000147138 | GPR174   |
| ENSG00000147145 | LPAR4    |
| ENSG00000147168 | IL2RG    |
| ENSG00000147274 | RBMX     |
| ENSG00000147380 | OPN1MW   |
| ENSG00000147383 | NSDHL    |
| ENSG00000147402 | GABRQ    |
| ENSG00000147437 | GNRH1    |
| ENSG00000147485 | PXDNL    |
| ENSG00000147571 | CRH      |
| ENSG00000147613 | PSKH2    |
| ENSG00000147655 | RSPO2    |
| ENSG00000147869 | CER1     |

|                 |          |
|-----------------|----------|
| ENSG00000147872 | PLIN2    |
| ENSG00000147885 | IFNA16   |
| ENSG00000148200 | NR6A1    |
| ENSG00000148346 | LCN2     |
| ENSG00000148604 | RGR      |
| ENSG00000148702 | HABP2    |
| ENSG00000148948 | LRRC4C   |
| ENSG00000149090 | PAMR1    |
| ENSG00000149243 | KLHL35   |
| ENSG00000149428 | HYOU1    |
| ENSG00000149435 | GGTLC1   |
| ENSG00000149506 | ZP1      |
| ENSG00000149575 | SCN2B    |
| ENSG00000149582 | TMEM25   |
| ENSG00000149639 | SOGA1    |
| ENSG00000149651 | SPINT4   |
| ENSG00000149735 | GPHA2    |
| ENSG00000149925 | ALDOA    |
| ENSG00000150361 | KLHL1    |
| ENSG00000150630 | VEGFC    |
| ENSG00000150656 | CNDP1    |
| ENSG00000151062 | CACNA2D4 |
| ENSG00000151079 | KCNA6    |
| ENSG00000151176 | PLBD2    |
| ENSG00000151882 | CCL28    |
| ENSG00000151914 | DST      |
| ENSG00000152086 | TUBA3E   |
| ENSG00000152207 | CYSLTR2  |
| ENSG00000152208 | GRID2    |
| ENSG00000152266 | PTH      |
| ENSG00000152315 | KCNK13   |
| ENSG00000152332 | UHMK1    |
| ENSG00000152377 | SPOCK1   |
| ENSG00000152558 | TMEM123  |
| ENSG00000152583 | SPARCL1  |
| ENSG00000152591 | DSPP     |
| ENSG00000152592 | DMP1     |
| ENSG00000152705 | CATSPER3 |
| ENSG00000153446 | C16orf89 |
| ENSG00000153898 | MCOLN2   |
| ENSG00000153993 | SEMA3D   |
| ENSG00000154096 | THY1     |

|                 |          |
|-----------------|----------|
| ENSG00000154165 | GPR15    |
| ENSG00000154175 | ABI3BP   |
| ENSG00000154237 | LRRK1    |
| ENSG00000154342 | WNT3A    |
| ENSG00000154358 | OBSCN    |
| ENSG00000154478 | GPR26    |
| ENSG00000154485 | MMP21    |
| ENSG00000154589 | LY96     |
| ENSG00000154611 | PSMA8    |
| ENSG00000154639 | CXADR    |
| ENSG00000154975 | CA10     |
| ENSG00000155016 | CYP2U1   |
| ENSG00000155269 | GPR78    |
| ENSG00000155659 | VSIG4    |
| ENSG00000155719 | OTOA     |
| ENSG00000156097 | GPR61    |
| ENSG00000156234 | CXCL13   |
| ENSG00000156298 | TSPAN7   |
| ENSG00000156345 | CDK20    |
| ENSG00000156466 | GDF6     |
| ENSG00000156486 | KCNS2    |
| ENSG00000156535 | CD109    |
| ENSG00000156574 | NODAL    |
| ENSG00000156642 | NPTN     |
| ENSG00000156970 | BUB1B    |
| ENSG00000156973 | PDE6D    |
| ENSG00000157119 | KLHL40   |
| ENSG00000157131 | C8A      |
| ENSG00000157150 | TIMP4    |
| ENSG00000157368 | IL34     |
| ENSG00000157445 | CACNA2D3 |
| ENSG00000157703 | SVOPL    |
| ENSG00000158292 | GPR153   |
| ENSG00000158445 | KCNB1    |
| ENSG00000158458 | NRG2     |
| ENSG00000158473 | CD1D     |
| ENSG00000158477 | CD1A     |
| ENSG00000158481 | CD1C     |
| ENSG00000158485 | CD1B     |
| ENSG00000158488 | CD1E     |
| ENSG00000158516 | CPA2     |
| ENSG00000158525 | CPA5     |

|                 |             |
|-----------------|-------------|
| ENSG00000158747 | NBL1        |
| ENSG00000158769 | F11R        |
| ENSG00000158828 | PINK1       |
| ENSG00000158874 | APOA2       |
| ENSG00000159189 | C1QC        |
| ENSG00000159377 | PSMB4       |
| ENSG00000159398 | CESSA       |
| ENSG00000159527 | PGLYRP3     |
| ENSG00000159674 | SPON2       |
| ENSG00000159723 | AGRP        |
| ENSG00000159763 | PIP         |
| ENSG00000159871 | LYPD5       |
| ENSG00000159899 | NPR2        |
| ENSG00000160097 | FNDC5       |
| ENSG00000160339 | FCN2        |
| ENSG00000160404 | TOR2A       |
| ENSG00000160447 | PKN3        |
| ENSG00000160602 | NEK8        |
| ENSG00000160654 | CD3G        |
| ENSG00000160862 | AZGP1       |
| ENSG00000161031 | PGLYRP2     |
| ENSG00000161055 | SCGB3A1     |
| ENSG00000161572 | LYZL6       |
| ENSG00000161573 | CCL16       |
| ENSG00000161574 | CCL15-CCL14 |
| ENSG00000161594 | KLHL10      |
| ENSG00000161610 | HCRT        |
| ENSG00000161618 | ALDH16A1    |
| ENSG00000161640 | SIGLEC11    |
| ENSG00000161671 | EMC10       |
| ENSG00000161807 | OR7G1       |
| ENSG00000162068 | NTN3        |
| ENSG00000162341 | TPCN2       |
| ENSG00000162344 | FGF19       |
| ENSG00000162365 | CYP4A22     |
| ENSG00000162413 | KLHL21      |
| ENSG00000162510 | MATN1       |
| ENSG00000162526 | TSSK3       |
| ENSG00000162604 | TM2D1       |
| ENSG00000162747 | FCGR3B      |
| ENSG00000162813 | BPNT1       |
| ENSG00000162896 | PIGR        |

|                 |          |
|-----------------|----------|
| ENSG00000162897 | FCAMR    |
| ENSG00000162975 | KCNF1    |
| ENSG00000162989 | KCNJ3    |
| ENSG00000163041 | H3F3A    |
| ENSG00000163170 | BOLA3    |
| ENSG00000163218 | PGLYRP4  |
| ENSG00000163220 | S100A9   |
| ENSG00000163221 | S100A12  |
| ENSG00000163283 | ALPP     |
| ENSG00000163376 | KBTBD8   |
| ENSG00000163377 | FAM19A4  |
| ENSG00000163382 | APOA1BP  |
| ENSG00000163421 | PROK2    |
| ENSG00000163430 | FSTL1    |
| ENSG00000163453 | IGFBP7   |
| ENSG00000163491 | NEK10    |
| ENSG00000163515 | RETNLB   |
| ENSG00000163518 | FCRL4    |
| ENSG00000163536 | SERPINI1 |
| ENSG00000163661 | PTX3     |
| ENSG00000163701 | IL17RE   |
| ENSG00000163702 | IL17RC   |
| ENSG00000163704 | PRRT3    |
| ENSG00000163739 | CXCL1    |
| ENSG00000163746 | PLSCR2   |
| ENSG00000163785 | RYK      |
| ENSG00000163794 | UCN      |
| ENSG00000163814 | CDCP1    |
| ENSG00000163815 | CLEC3B   |
| ENSG00000163817 | SLC6A20  |
| ENSG00000163898 | LIPH     |
| ENSG00000163914 | RHO      |
| ENSG00000163975 | MF12     |
| ENSG00000163982 | OTOP1    |
| ENSG00000164022 | AIMP1    |
| ENSG00000164047 | CAMP     |
| ENSG00000164076 | CAMKV    |
| ENSG00000164089 | ETNPPL   |
| ENSG00000164099 | PRSS12   |
| ENSG00000164104 | HMGB2    |
| ENSG00000164106 | SCRG1    |
| ENSG00000164252 | AGGF1    |

|                 |         |
|-----------------|---------|
| ENSG00000164283 | ESM1    |
| ENSG00000164303 | ENPP6   |
| ENSG00000164326 | CARTPT  |
| ENSG00000164342 | TLR3    |
| ENSG00000164347 | GFM2    |
| ENSG00000164363 | SLC6A18 |
| ENSG00000164404 | GDF9    |
| ENSG00000164406 | LEAP2   |
| ENSG00000164509 | IL31RA  |
| ENSG00000164604 | GPR85   |
| ENSG00000164619 | BMPER   |
| ENSG00000164626 | KCNK5   |
| ENSG00000164715 | LMTK2   |
| ENSG00000164749 | HNF4G   |
| ENSG00000164794 | KCNV1   |
| ENSG00000164816 | DEFA5   |
| ENSG00000164825 | DEFB1   |
| ENSG00000164849 | GPR146  |
| ENSG00000164871 | SPAG11B |
| ENSG00000164932 | CTHRC1  |
| ENSG00000165059 | PRKACG  |
| ENSG00000165072 | MAMDC2  |
| ENSG00000165078 | CPA6    |
| ENSG00000165097 | KDM1B   |
| ENSG00000165125 | TRPV6   |
| ENSG00000165197 | FIGF    |
| ENSG00000165238 | WNK2    |
| ENSG00000165246 | NLGN4Y  |
| ENSG00000165323 | FAT3    |
| ENSG00000165370 | GPR101  |
| ENSG00000165457 | FOLR2   |
| ENSG00000165572 | KBTBD6  |
| ENSG00000165621 | OXGR1   |
| ENSG00000165623 | UCMA    |
| ENSG00000165675 | ENOX2   |
| ENSG00000165799 | RNASE7  |
| ENSG00000165816 | VWA2    |
| ENSG00000165828 | PRAP1   |
| ENSG00000166006 | KCNC2   |
| ENSG00000166073 | GPR176  |
| ENSG00000166086 | JAM3    |
| ENSG00000166111 | SVOP    |

|                 |           |
|-----------------|-----------|
| ENSG00000166160 | OPN1MW2   |
| ENSG00000166257 | SCN3B     |
| ENSG00000166311 | SMPD1     |
| ENSG00000166333 | ILK       |
| ENSG00000166340 | TPP1      |
| ENSG00000166363 | OR10A5    |
| ENSG00000166396 | SERPINB7  |
| ENSG00000166401 | SERPINB8  |
| ENSG00000166482 | MFAP4     |
| ENSG00000166509 | CLEC3A    |
| ENSG00000166634 | SERPINB12 |
| ENSG00000166664 | CHRFAM7A  |
| ENSG00000166710 | B2M       |
| ENSG00000166762 | CATSPER2  |
| ENSG00000166856 | GPR182    |
| ENSG00000166862 | CACNG2    |
| ENSG00000166863 | TAC3      |
| ENSG00000167004 | PDIA3     |
| ENSG00000167104 | BPIFB6    |
| ENSG00000167178 | ISLR2     |
| ENSG00000167236 | CCL23     |
| ENSG00000167258 | CDK12     |
| ENSG00000167286 | CD3D      |
| ENSG00000167332 | OR51E2    |
| ENSG00000167419 | LPO       |
| ENSG00000167487 | KLHL26    |
| ENSG00000167531 | LALBA     |
| ENSG00000167552 | TUBA1A    |
| ENSG00000167553 | TUBA1C    |
| ENSG00000167613 | LAIR1     |
| ENSG00000167618 | LAIR2     |
| ENSG00000167656 | LY6D      |
| ENSG00000167664 | TMIGD2    |
| ENSG00000167680 | SEMA6B    |
| ENSG00000167740 | CYB5D2    |
| ENSG00000167741 | GGT6      |
| ENSG00000167757 | KLK11     |
| ENSG00000167759 | KLK13     |
| ENSG00000167775 | CD320     |
| ENSG00000167850 | CD300C    |
| ENSG00000167851 | CD300A    |
| ENSG00000167972 | ABCA3     |

|                 |               |
|-----------------|---------------|
| ENSG00000168003 | SLC3A2        |
| ENSG00000168038 | ULK4          |
| ENSG00000168081 | PNOC          |
| ENSG00000168135 | KCNJ4         |
| ENSG00000168140 | VASN          |
| ENSG00000168263 | KCNV2         |
| ENSG00000168404 | MLKL          |
| ENSG00000168418 | KCNG4         |
| ENSG00000168427 | KLHL30        |
| ENSG00000168515 | SCGB1D1       |
| ENSG00000168542 | COL3A1        |
| ENSG00000168621 | GDNF          |
| ENSG00000168827 | GFMI          |
| ENSG00000168828 | OR13J1        |
| ENSG00000168878 | SFTPB         |
| ENSG00000168913 | ENHO          |
| ENSG00000168961 | LGALS9        |
| ENSG00000168970 | JMJD7-PLA2G4B |
| ENSG00000168995 | SIGLEC7       |
| ENSG00000169035 | KLK7          |
| ENSG00000169071 | ROR2          |
| ENSG00000169116 | PARM1         |
| ENSG00000169218 | RSPO1         |
| ENSG00000169248 | CXCL11        |
| ENSG00000169297 | NR0B1         |
| ENSG00000169306 | IL1RAPL1      |
| ENSG00000169385 | RNASE2        |
| ENSG00000169397 | RNASE3        |
| ENSG00000169436 | COL22A1       |
| ENSG00000169439 | SDC2          |
| ENSG00000169488 | OR4K15        |
| ENSG00000169495 | HTRA4         |
| ENSG00000169508 | GPR183        |
| ENSG00000169562 | GJB1          |
| ENSG00000169575 | VPREB1        |
| ENSG00000169679 | BUB1          |
| ENSG00000169704 | GP9           |
| ENSG00000169760 | NLGN1         |
| ENSG00000169876 | MUC17         |
| ENSG00000169884 | WNT10B        |
| ENSG00000169908 | TM4SF1        |
| ENSG00000169919 | GUSB          |

|                 |          |
|-----------------|----------|
| ENSG00000169962 | TAS1R3   |
| ENSG00000169992 | NLGN2    |
| ENSG00000170017 | ALCAM    |
| ENSG00000170075 | GPR37L1  |
| ENSG00000170128 | GPR25    |
| ENSG00000170180 | GYP A    |
| ENSG00000170275 | CRTAP    |
| ENSG00000170289 | CNGB3    |
| ENSG00000170373 | CST1     |
| ENSG00000170381 | SEMA3E   |
| ENSG00000170542 | SERPINB9 |
| ENSG00000170745 | KCNS3    |
| ENSG00000170775 | GPR37    |
| ENSG00000170801 | HTRA3    |
| ENSG00000170837 | GPR27    |
| ENSG00000170852 | KBTBD2   |
| ENSG00000170891 | CYTL1    |
| ENSG00000170893 | TRH      |
| ENSG00000170923 | OR7G2    |
| ENSG00000170929 | OR1M1    |
| ENSG00000170953 | OR8B12   |
| ENSG00000170965 | PLAC1    |
| ENSG00000171126 | KCNG3    |
| ENSG00000171199 | PROL1    |
| ENSG00000171201 | SMR3B    |
| ENSG00000171208 | NETO2    |
| ENSG00000171209 | CSN3     |
| ENSG00000171236 | LRG1     |
| ENSG00000171365 | CLCN5    |
| ENSG00000171385 | KCND3    |
| ENSG00000171388 | APLN     |
| ENSG00000171478 | SPACA5B  |
| ENSG00000171489 | SPACA5   |
| ENSG00000171496 | OR1L8    |
| ENSG00000171596 | NMUR1    |
| ENSG00000171603 | CLSTN1   |
| ENSG00000171617 | ENC1     |
| ENSG00000171657 | GPR82    |
| ENSG00000171659 | GPR34    |
| ENSG00000171711 | DEFB4A   |
| ENSG00000171819 | ANGPTL7  |
| ENSG00000171855 | IFNB1    |

|                 |           |
|-----------------|-----------|
| ENSG00000171885 | AQP4      |
| ENSG00000171954 | CYP4F22   |
| ENSG00000172016 | REG3A     |
| ENSG00000172023 | REG1B     |
| ENSG00000172146 | OR1A1     |
| ENSG00000172209 | GPR22     |
| ENSG00000172215 | CXCR6     |
| ENSG00000172232 | AZU1      |
| ENSG00000172382 | PRSS27    |
| ENSG00000172410 | INSL5     |
| ENSG00000172551 | MUCL1     |
| ENSG00000172578 | KLHL6     |
| ENSG00000172594 | SMPDL3A   |
| ENSG00000172680 | MOS       |
| ENSG00000172742 | OR4D9     |
| ENSG00000172752 | COL6A5    |
| ENSG00000172824 | CES4A     |
| ENSG00000172828 | CES3      |
| ENSG00000172935 | MRGPRF    |
| ENSG00000172938 | MRGPRD    |
| ENSG00000173080 | RXFP4     |
| ENSG00000173114 | LRRN3     |
| ENSG00000173250 | GPR151    |
| ENSG00000173269 | MMRN2     |
| ENSG00000173302 | GPR148    |
| ENSG00000173338 | KCNK7     |
| ENSG00000173369 | C1QB      |
| ENSG00000173372 | C1QA      |
| ENSG00000173376 | NDNF      |
| ENSG00000173391 | OLR1      |
| ENSG00000173401 | GLIPR1L1  |
| ENSG00000173402 | DAG1      |
| ENSG00000173431 | RNASE8    |
| ENSG00000173467 | AGR3      |
| ENSG00000173517 | PEAK1     |
| ENSG00000173530 | TNFRSF10D |
| ENSG00000173535 | TNFRSF10C |
| ENSG00000173546 | CSPG4     |
| ENSG00000173578 | XCR1      |
| ENSG00000173612 | GPRC6A    |
| ENSG00000173662 | TAS1R1    |
| ENSG00000173702 | MUC13     |

|                 |          |
|-----------------|----------|
| ENSG00000173714 | WFIKKN2  |
| ENSG00000173762 | CD7      |
| ENSG00000173786 | CNP      |
| ENSG00000173890 | GPR160   |
| ENSG00000174010 | KLHL15   |
| ENSG00000174123 | TLR10    |
| ENSG00000174125 | TLR1     |
| ENSG00000174130 | TLR6     |
| ENSG00000174358 | SLC6A19  |
| ENSG00000174437 | ATP2A2   |
| ENSG00000174482 | LINGO2   |
| ENSG00000174564 | IL20RB   |
| ENSG00000174697 | LEP      |
| ENSG00000174721 | FGFBP3   |
| ENSG00000174804 | FZD4     |
| ENSG00000174808 | BTC      |
| ENSG00000174944 | P2RY14   |
| ENSG00000174946 | GPR171   |
| ENSG00000174948 | GPR149   |
| ENSG00000174950 | CD164L2  |
| ENSG00000174992 | ZG16     |
| ENSG00000175087 | PDIK1L   |
| ENSG00000175294 | CATSPER1 |
| ENSG00000175315 | CST6     |
| ENSG00000175348 | TMEM9B   |
| ENSG00000175398 | OR10P1   |
| ENSG00000175497 | DPP10    |
| ENSG00000175505 | CLCF1    |
| ENSG00000175514 | GPR152   |
| ENSG00000175745 | NR2F1    |
| ENSG00000175793 | SFN      |
| ENSG00000175894 | TSPEAR   |
| ENSG00000175899 | A2M      |
| ENSG00000175928 | LRRN1    |
| ENSG00000175946 | KLHL38   |
| ENSG00000176230 | OR4K17   |
| ENSG00000176281 | OR4K5    |
| ENSG00000176358 | TAC4     |
| ENSG00000176595 | KBTBD11  |
| ENSG00000176695 | OR4F17   |
| ENSG00000176782 | DEFB104A |
| ENSG00000176797 | DEFB103A |

|                 |          |
|-----------------|----------|
| ENSG00000176971 | FIBIN    |
| ENSG00000177023 | DEFB104B |
| ENSG00000177030 | DEAF1    |
| ENSG00000177047 | IFNW1    |
| ENSG00000177243 | DEFB103B |
| ENSG00000177301 | KCNA2    |
| ENSG00000177464 | GPR4     |
| ENSG00000177535 | OR2B11   |
| ENSG00000177575 | CD163    |
| ENSG00000177675 | CD163L1  |
| ENSG00000177684 | DEFB114  |
| ENSG00000177693 | OR4F4    |
| ENSG00000177706 | FAM20C   |
| ENSG00000177707 | PVRL3    |
| ENSG00000178015 | GPR150   |
| ENSG00000178093 | TSSK6    |
| ENSG00000178172 | SPINK6   |
| ENSG00000178201 | VN1R1    |
| ENSG00000178287 | SPAG11A  |
| ENSG00000178342 | KCNG2    |
| ENSG00000178462 | TUBAL3   |
| ENSG00000178473 | UCN3     |
| ENSG00000178522 | AMBN     |
| ENSG00000178602 | OTOS     |
| ENSG00000178726 | THBD     |
| ENSG00000178732 | GP5      |
| ENSG00000178772 | CPN2     |
| ENSG00000178789 | CD300LB  |
| ENSG00000178934 | LGALS7B  |
| ENSG00000179148 | ALOXE3   |
| ENSG00000179284 | DAND5    |
| ENSG00000179403 | VWA1     |
| ENSG00000179431 | FJX1     |
| ENSG00000179454 | KLHL28   |
| ENSG00000179477 | ALOX12B  |
| ENSG00000179542 | SLITRK4  |
| ENSG00000179593 | ALOX15B  |
| ENSG00000179776 | CDH5     |
| ENSG00000179817 | MRGPRX4  |
| ENSG00000179826 | MRGPRX3  |
| ENSG00000179869 | ABCA13   |
| ENSG00000180269 | GPR139   |

|                 |          |
|-----------------|----------|
| ENSG00000180708 | OR10K2   |
| ENSG00000180730 | SHISA2   |
| ENSG00000180785 | OR51E1   |
| ENSG00000180872 | DEFB112  |
| ENSG00000180929 | GPR62    |
| ENSG00000181333 | HEPHL1   |
| ENSG00000181374 | CCL13    |
| ENSG00000181617 | FDCSP    |
| ENSG00000181619 | GPR135   |
| ENSG00000181631 | P2RY13   |
| ENSG00000181656 | GPR88    |
| ENSG00000181761 | OR8H3    |
| ENSG00000181773 | GPR3     |
| ENSG00000181785 | OR5AS1   |
| ENSG00000181935 | OR4C16   |
| ENSG00000181961 | OR4A16   |
| ENSG00000182156 | ENPP7    |
| ENSG00000182162 | P2RY8    |
| ENSG00000182170 | MRGPRG   |
| ENSG00000182217 | HIST2H4B |
| ENSG00000182220 | ATP6AP2  |
| ENSG00000182255 | KCNA4    |
| ENSG00000182324 | KCNJ14   |
| ENSG00000182389 | CACNB4   |
| ENSG00000182447 | OTOL1    |
| ENSG00000182450 | KCNK4    |
| ENSG00000182492 | BGN      |
| ENSG00000182572 | HIST1H3I |
| ENSG00000182575 | NXPH3    |
| ENSG00000182613 | OR2V2    |
| ENSG00000182631 | RXFP3    |
| ENSG00000182687 | GALR2    |
| ENSG00000182698 | RESP18   |
| ENSG00000182700 | IGIP     |
| ENSG00000182718 | ANXA2    |
| ENSG00000182771 | GRID1    |
| ENSG00000182783 | OR2T29   |
| ENSG00000182851 | GPIHBP1  |
| ENSG00000182885 | GPR97    |
| ENSG00000183038 | GGTLC3   |
| ENSG00000183087 | GAS6     |
| ENSG00000183090 | FREM3    |

|                 |          |
|-----------------|----------|
| ENSG00000183150 | GPR19    |
| ENSG00000183185 | GABRR3   |
| ENSG00000183281 | PLGLB1   |
| ENSG00000183310 | OR2T34   |
| ENSG00000183395 | PMCH     |
| ENSG00000183484 | GPR132   |
| ENSG00000183520 | UTP11L   |
| ENSG00000183598 | HIST2H3D |
| ENSG00000183628 | DGCR6    |
| ENSG00000183655 | KLHL25   |
| ENSG00000183662 | FAM19A1  |
| ENSG00000183671 | GPR1     |
| ENSG00000183695 | MRGPRX2  |
| ENSG00000183748 |          |
| ENSG00000183785 | TUBA8    |
| ENSG00000183798 | EMILIN3  |
| ENSG00000183801 | OLFML1   |
| ENSG00000183840 | GPR39    |
| ENSG00000183862 | CNGA2    |
| ENSG00000183876 | ARSI     |
| ENSG00000183908 | LRRC55   |
| ENSG00000183921 | SDR42E2  |
| ENSG00000183941 | HIST2H4A |
| ENSG00000183960 | KCNH8    |
| ENSG00000183979 | NPB      |
| ENSG00000184012 | TMPRSS2  |
| ENSG00000184022 | OR2T10   |
| ENSG00000184144 | CNTN2    |
| ENSG00000184154 | LRTOMT   |
| ENSG00000184166 | OR1D2    |
| ENSG00000184194 | GPR173   |
| ENSG00000184261 | KCNK12   |
| ENSG00000184276 | DEFB108B |
| ENSG00000184344 | GDF3     |
| ENSG00000184350 | MRGPRE   |
| ENSG00000184451 | CCR10    |
| ENSG00000184471 | C1QTNF8  |
| ENSG00000184500 | PROS1    |
| ENSG00000184613 | NELL2    |
| ENSG00000184831 | APOO     |
| ENSG00000184860 | SDR42E1  |
| ENSG00000184908 | CLCNKB   |

|                 |           |
|-----------------|-----------|
| ENSG00000184956 | MUC6      |
| ENSG00000185033 | SEMA4B    |
| ENSG00000185070 | FLRT2     |
| ENSG00000185127 | C6orf120  |
| ENSG00000185250 | PPIL6     |
| ENSG00000185267 | CDNF      |
| ENSG00000185269 | NOTUM     |
| ENSG00000185271 | KLHL33    |
| ENSG00000185303 | SFTPA2    |
| ENSG00000185324 | CDK10     |
| ENSG00000185483 | ROR1      |
| ENSG00000185527 | PDE6G     |
| ENSG00000185551 | NR2F2     |
| ENSG00000185585 | OLFML2A   |
| ENSG00000185652 | NTF3      |
| ENSG00000185674 | LYG2      |
| ENSG00000185745 | IFIT1     |
| ENSG00000185862 | EVI2B     |
| ENSG00000185897 | FFAR3     |
| ENSG00000185924 | RTN4RL1   |
| ENSG00000186092 | OR4F5     |
| ENSG00000186190 | BPIFB3    |
| ENSG00000186191 | BPIFB4    |
| ENSG00000186231 | KLHL32    |
| ENSG00000186265 | BTLA      |
| ENSG00000186340 | THBS2     |
| ENSG00000186377 | CYP4X1    |
| ENSG00000186407 | CD300E    |
| ENSG00000186470 | BTN3A2    |
| ENSG00000186474 | KLK12     |
| ENSG00000186562 | DEFB105A  |
| ENSG00000186572 | DEFB107A  |
| ENSG00000186579 | DEFB106A  |
| ENSG00000186599 | DEFB105B  |
| ENSG00000186815 | TPCN1     |
| ENSG00000186818 | LILRB4    |
| ENSG00000186867 | QRFPR     |
| ENSG00000186910 | SERPINA11 |
| ENSG00000186912 | P2RY4     |
| ENSG00000186919 | ZACN      |
| ENSG00000186998 | EMID1     |
| ENSG00000187037 | GPR141    |

|                 |                |
|-----------------|----------------|
| ENSG00000187082 | DEFB106B       |
| ENSG00000187474 | FPR3           |
| ENSG00000187550 | SBK2           |
| ENSG00000187554 | TLR5           |
| ENSG00000187608 | ISG15          |
| ENSG00000187689 | AMTN           |
| ENSG00000187715 | KBTBD12        |
| ENSG00000187730 | GABRD          |
| ENSG00000187838 | TMEM256-PLSCR3 |
| ENSG00000187908 | DMBT1          |
| ENSG00000187950 | OVCH1          |
| ENSG00000187955 | COL14A1        |
| ENSG00000187961 | KLHL17         |
| ENSG00000187997 | C17orf99       |
| ENSG00000188153 | COL4A5         |
| ENSG00000188162 | OTOG           |
| ENSG00000188293 | IGFL1          |
| ENSG00000188313 | PLSCR1         |
| ENSG00000188394 | GPR21          |
| ENSG00000188501 | LCTL           |
| ENSG00000188624 | IGFL3          |
| ENSG00000188730 | VWC2           |
| ENSG00000188782 | CATSPER4       |
| ENSG00000188937 | NYX            |
| ENSG00000188992 | LIPI           |
| ENSG00000189052 | CGB5           |
| ENSG00000189058 | APOD           |
| ENSG00000189108 | IL1RAPL2       |
| ENSG00000189171 | S100A13        |
| ENSG00000189377 | CXCL17         |
| ENSG00000196131 | VN1R2          |
| ENSG00000196159 | FAT4           |
| ENSG00000196182 | STK40          |
| ENSG00000196337 | CGB7           |
| ENSG00000196338 | NLGN3          |
| ENSG00000196415 | PRTN3          |
| ENSG00000196455 | PIK3R4         |
| ENSG00000196539 | OR2T3          |
| ENSG00000196600 | SLC22A25       |
| ENSG00000196715 | VKORC1L1       |
| ENSG00000196748 | CLPSL2         |
| ENSG00000196776 | CD47           |

|                 |           |
|-----------------|-----------|
| ENSG00000196834 | POTEI     |
| ENSG00000196844 | PATE2     |
| ENSG00000196917 | HCAR1     |
| ENSG00000197106 | SLC6A17   |
| ENSG00000197140 | ADAM32    |
| ENSG00000197153 | HIST1H3J  |
| ENSG00000197233 | OR1J2     |
| ENSG00000197238 | HIST1H4J  |
| ENSG00000197262 | CCL4L2    |
| ENSG00000197273 | GUCA2A    |
| ENSG00000197406 | DIO3      |
| ENSG00000197429 | IPP       |
| ENSG00000197461 | PDGFA     |
| ENSG00000197465 | GYPE      |
| ENSG00000197471 | SPN       |
| ENSG00000197487 | GALP      |
| ENSG00000197540 | GZMM      |
| ENSG00000197565 | COL4A6    |
| ENSG00000197614 | MFAP5     |
| ENSG00000197632 | SERPINB2  |
| ENSG00000197641 | SERPINB13 |
| ENSG00000197658 | SLC22A24  |
| ENSG00000197674 | OR51C1P   |
| ENSG00000197696 | NMB       |
| ENSG00000197790 | OR52M1    |
| ENSG00000197822 | OCLN      |
| ENSG00000197837 | HIST4H4   |
| ENSG00000197870 | PRB3      |
| ENSG00000197914 | HIST1H4K  |
| ENSG00000197930 | ERO1L     |
| ENSG00000197953 | AADACL2   |
| ENSG00000197993 | KEL       |
| ENSG00000198033 | TUBA3C    |
| ENSG00000198129 | DEFB107B  |
| ENSG00000198178 | CLEC4C    |
| ENSG00000198183 | BPIFA1    |
| ENSG00000198208 | RPS6KL1   |
| ENSG00000198216 | CACNA1E   |
| ENSG00000198246 | SLC29A3   |
| ENSG00000198515 | CNGA1     |
| ENSG00000198558 | HIST1H4L  |
| ENSG00000198642 | KLHL9     |

|                 |          |
|-----------------|----------|
| ENSG00000198739 | LRRTM3   |
| ENSG00000198759 | EGFL6    |
| ENSG00000198788 | MUC2     |
| ENSG00000198870 | C9orf96  |
| ENSG00000198910 | L1CAM    |
| ENSG00000198951 | NAGA     |
| ENSG00000198963 | RORB     |
| ENSG00000203618 | GP1BB    |
| ENSG00000203661 | OR2T5    |
| ENSG00000203722 | RAET1G   |
| ENSG00000203737 | GPR52    |
| ENSG00000203811 | HIST2H3C |
| ENSG00000203813 | HIST1H3H |
| ENSG00000203837 | PNLIPRP3 |
| ENSG00000203852 | HIST2H3A |
| ENSG00000203970 | DEFB110  |
| ENSG00000204001 | LCN8     |
| ENSG00000204003 |          |
| ENSG00000204033 | LRIT2    |
| ENSG00000204174 | NPY4R    |
| ENSG00000204176 | SYT15    |
| ENSG00000204262 | COL5A2   |
| ENSG00000204291 | COL15A1  |
| ENSG00000204345 | CD300LD  |
| ENSG00000204640 | NMS      |
| ENSG00000204657 | OR2H2    |
| ENSG00000204687 | MAS1L    |
| ENSG00000204688 | OR2H1    |
| ENSG00000204694 | OR11A1   |
| ENSG00000204695 | OR14J1   |
| ENSG00000204882 | GPR20    |
| ENSG00000204909 | SPINK9   |
| ENSG00000204922 | C11orf83 |
| ENSG00000204936 | CD177    |
| ENSG00000205020 | CCL4L1   |
| ENSG00000205021 | CCL3L1   |
| ENSG00000205076 | LGALS7   |
| ENSG00000205111 | CDKL4    |
| ENSG00000205213 | LGR4     |
| ENSG00000205220 | PSMB10   |
| ENSG00000205221 | VIT      |
| ENSG00000205336 | GPR56    |

|                 |           |
|-----------------|-----------|
| ENSG00000205649 | HTN3      |
| ENSG00000206072 | SERPINB11 |
| ENSG00000206073 | SERPINB4  |
| ENSG00000206075 | SERPINB5  |
| ENSG00000206150 | RNASE13   |
| ENSG00000206384 | COL6A6    |
| ENSG00000206561 | COLQ      |
| ENSG00000211592 | IGKC      |
| ENSG00000211598 | IGKV4-1   |
| ENSG00000211599 | IGKV5-2   |
| ENSG00000211619 | IGKV2-40  |
| ENSG00000211633 | IGKV1D-42 |
| ENSG00000211637 | IGLV4-69  |
| ENSG00000211638 | IGLV8-61  |
| ENSG00000211642 | IGLV10-54 |
| ENSG00000211644 | IGLV1-51  |
| ENSG00000211649 | IGLV7-46  |
| ENSG00000211650 | IGLV5-45  |
| ENSG00000211651 | IGLV1-44  |
| ENSG00000211652 | IGLV7-43  |
| ENSG00000211653 | IGLV1-40  |
| ENSG00000211654 | IGLV5-37  |
| ENSG00000211655 | IGLV1-36  |
| ENSG00000211658 | IGLV3-27  |
| ENSG00000211659 | IGLV3-25  |
| ENSG00000211660 | IGLV2-23  |
| ENSG00000211661 | IGLV3-22  |
| ENSG00000211664 | IGLV2-18  |
| ENSG00000211665 | IGLV3-16  |
| ENSG00000211667 | IGLV3-12  |
| ENSG00000211668 | IGLV2-11  |
| ENSG00000211672 | IGLV4-3   |
| ENSG00000211677 | IGLC2     |
| ENSG00000211679 | IGLC3     |
| ENSG00000211685 | IGLC7     |
| ENSG00000211790 | TRAV8-4   |
| ENSG00000211890 | IGHA2     |
| ENSG00000211892 | IGHG4     |
| ENSG00000211893 | IGHG2     |
| ENSG00000211898 | IGHD      |
| ENSG00000211899 | IGHM      |
| ENSG00000211934 | IGHV1-2   |

|                 |           |
|-----------------|-----------|
| ENSG00000211949 | IGHV3-23  |
| ENSG00000211962 | IGHV1-46  |
| ENSG00000211979 | IGHV7-81  |
| ENSG00000213022 | KLK9      |
| ENSG00000213024 | NUP62     |
| ENSG00000213030 | CGB8      |
| ENSG00000213160 | KLHL23    |
| ENSG00000213240 | NOTCH2NL  |
| ENSG00000213420 | GPC2      |
| ENSG00000213494 | CCL14     |
| ENSG00000213614 | HEXA      |
| ENSG00000214013 | GANC      |
| ENSG00000214274 | ANG       |
| ENSG00000214285 | NPS       |
| ENSG00000214642 | DEFB113   |
| ENSG00000214943 | GPR33     |
| ENSG00000215183 | MSMP      |
| ENSG00000215262 | KCNU1     |
| ENSG00000215428 |           |
| ENSG00000215545 | DEFB116   |
| ENSG00000215547 | DEFB115   |
| ENSG00000217555 | CKLF      |
| ENSG00000221888 | OR1C1     |
| ENSG00000224041 | IGKV3D-15 |
| ENSG00000224383 | C17orf72  |
| ENSG00000224389 | C4B       |
| ENSG00000224586 | GPX5      |
| ENSG00000228083 | IFNA14    |
| ENSG00000230657 | PRB4      |
| ENSG00000231852 | CYP21A2   |
| ENSG00000231887 | PRH1      |
| ENSG00000231924 | PSG1      |
| ENSG00000232196 | MTRNR2L4  |
| ENSG00000234829 | IFNA17    |
| ENSG00000237110 | TAAR9     |
| ENSG00000237353 | PATE4     |
| ENSG00000239951 | IGKV3-20  |
| ENSG00000239998 | LILRA2    |
| ENSG00000240065 | PSMB9     |
| ENSG00000240654 | C1QTNF9   |
| ENSG00000241244 | IGKV1D-16 |
| ENSG00000241351 | IGKV3-11  |

|                 |           |
|-----------------|-----------|
| ENSG00000241399 | CD302     |
| ENSG00000241563 | CORT      |
| ENSG00000242019 | KIR3DL3   |
| ENSG00000242221 | PSG2      |
| ENSG00000242252 | BGLAP     |
| ENSG00000242371 | IGKV1-39  |
| ENSG00000242550 | SERPINB10 |
| ENSG00000243063 | IGKV3-7   |
| ENSG00000243238 | IGKV2-30  |
| ENSG00000243264 | IGKV2D-29 |
| ENSG00000243364 | EFNA4     |
| ENSG00000243466 | IGKV1-5   |
| ENSG00000243646 | IL10RB    |
| ENSG00000243709 | LEFTY1    |
| ENSG00000244038 | DDOST     |
| ENSG00000244437 | IGKV3-15  |
| ENSG00000249860 | MTRNR2L5  |
| ENSG00000250361 | GYPB      |
| ENSG00000250510 | GPR162    |
| ENSG00000250722 | SEPP1     |
| ENSG00000251039 | IGKV2D-40 |
| ENSG00000251546 | IGKV1D-39 |
| ENSG00000253309 | SERPINE3  |
| ENSG00000254521 | SIGLEC12  |
| ENSG00000254709 | IGLL5     |
| ENSG00000255307 | OR52B2    |
| ENSG00000255823 | MTRNR2L8  |
| ENSG00000256045 | MTRNR2L10 |
| ENSG00000256222 | MTRNR2L3  |
| ENSG00000256394 | ASIC5     |
| ENSG00000256515 | CCL3L3    |
| ENSG00000256618 | MTRNR2L1  |
| ENSG00000256892 | MTRNR2L7  |
| ENSG00000258818 | RNASE4    |
| ENSG00000259803 | SLC22A31  |
| ENSG00000261609 | GAN       |

---

**Table S3.** Druggable gene name.

---

**gene name**

---

A2M

AADAT

AAK1

AANAT  
ABAT  
ABCA1  
ABCA4  
ABCA5  
ABCB1  
ABCB11  
ABCB4  
ABCB5  
ABCC1  
ABCC10  
ABCC11  
ABCC2  
ABCC3  
ABCC4  
ABCC5  
ABCC6  
ABCC8  
ABCC9  
ABCG1  
ABCG2  
ABCG4  
ABCG8  
ABHD12  
ABHD6  
ABI1  
ABL1  
ABL2  
ABO  
ACACA  
ACACB  
ACADM  
ACADSB  
ACAT1  
ACAT2  
ACE  
ACE2  
ACHE  
ACKR1  
ACKR3  
ACKR4  
ACLY

ACO1  
ACP1  
ACP3  
ACP5  
ACR  
ACSS2  
ACSS3  
ACTA1  
ACTB  
ACTC1  
ACTG1  
ACTR2  
ACVR1  
ACVR1B  
ACVR1C  
ACVR2A  
ACVR2B  
ACVRL1  
ACY3  
ACYP2  
AD5  
ADA  
ADAM10  
ADAM12  
ADAM17  
ADAM33  
ADAM8  
ADAM9  
ADAMTS1  
ADAMTS4  
ADAMTS5  
ADCY1  
ADCY10  
ADCY2  
ADCY5  
ADCY6  
ADCY9  
ADCYAP1  
ADCYAP1R1  
ADD1  
ADGRB1  
ADGRG3

ADGRL3  
ADGRV1  
ADH1A  
ADH1B  
ADH1C  
ADH4  
ADH7  
ADIPOQ  
ADK  
ADM  
ADO  
ADORA1  
ADORA2A  
ADORA2A-AS1  
ADORA2B  
ADORA3  
ADRA1A  
ADRA1B  
ADRA1D  
ADRA2A  
ADRA2B  
ADRA2C  
ADRB1  
ADRB2  
ADRB3  
ADRM1  
ADSS2  
AFP  
AGBL4  
AGER  
AGRP  
AGT  
AGTR1  
AGTR2  
AHCY  
AHR  
AHRR  
AICDA  
AIFM1  
AIP  
AK2  
AK4

AKAP13  
AKR1A1  
AKR1B1  
AKR1B10  
AKR1C1  
AKR1C2  
AKR1C3  
AKR1C4  
AKR1D1  
AKR7A2  
AKT1  
AKT1S1  
AKT2  
AKT3  
ALAD  
ALB  
ALCAM  
ALDH1A1  
ALDH1A2  
ALDH1L1  
ALDH2  
ALDH3A1  
ALDH3A2  
ALDH5A1  
ALDH7A1  
ALG10  
ALK  
ALOX12  
ALOX15  
ALOX15B  
ALOX5  
ALOX5AP  
ALPG  
ALPI  
ALPL  
ALPP  
AMACR  
AMD1  
AMH  
AMHR2  
AMOT  
AMPD1

AMY2A  
ANGPT1  
ANGPT2  
ANGPTL3  
ANKFN1  
ANKK1  
ANKRD30B  
ANKS1B  
ANO1  
ANO2  
ANPEP  
ANXA1  
ANXA2  
ANXA5  
AOAH  
AOC3  
AOPEP  
AOX1  
APAF1  
APBA1  
APBB1  
APC  
APCS  
APEH  
APEX1  
APH1A  
APH1B  
APLF  
APLN  
APLNR  
APOA1  
APOA2  
APOA5  
APOB  
APOBEC3A  
APOBEC3B  
APOBEC3F  
APOBEC3G  
APOC3  
APOD  
APOE  
APP

APRT  
AQP1  
AQP10  
AQP2  
AQP3  
AQP4  
AQP5  
AQP6  
AQP7  
AQP8  
AQP9  
AR  
ARAF  
ARAP2  
AREG  
ARF6  
ARG1  
ARG2  
ARHGAP12  
ARHGEF28  
ARID1A  
ARID5B  
ARMS2  
ARNT  
ARRB1  
ARRB2  
ARSA  
ARSB  
ASGR1  
ASIC1  
ASIC2  
ASIC3  
ASIC4  
ASL  
ASNS  
ASPG  
ASPH  
ASS1  
ASXL1  
ATAD2  
ATAD2B  
ATAD5

ATAT1  
ATF2  
ATF3  
ATF4  
ATG16L1  
ATG4B  
ATG5  
ATIC  
ATM  
ATP10A  
ATP1A1  
ATP1A2  
ATP1A3  
ATP1A4  
ATP1B1  
ATP1B2  
ATP1B3  
ATP2A1  
ATP2A2  
ATP2A3  
ATP2B1  
ATP2C1  
ATP4A  
ATP4B  
ATP5F1D  
ATP5F1E  
ATP6V1B2  
ATP7A  
ATP7B  
ATR  
ATRX  
ATXN1L  
ATXN2  
AURKA  
AURKB  
AURKC  
AVPR1A  
AVPR1B  
AVPR2  
AXIN1  
AXIN2  
AXL

B2M  
B3GAT1  
B4GALNT1  
B4GALT2  
BACE1  
BACE2  
BACH1  
BAD  
BAG6  
BAK1  
BAP1  
BARD1  
BAX  
BAZ2A  
BAZ2B  
BBOX1  
BCAR1  
BCAR3  
BCAT2  
BCHE  
BCL2  
BCL2A1  
BCL2L1  
BCL2L10  
BCL2L11  
BCL2L2  
BCL6  
BCOR  
BCORL1  
BCR  
BDKRB1  
BDKRB2  
BDNF  
BDNF-AS  
BGLAP  
BHLHE40  
BHMT  
BHMT2  
BIRC2  
BIRC3  
BIRC5  
BIRC7

BLK  
BLM  
BLVRA  
BLVRB  
BMP1  
BMP10  
BMP2  
BMP2K  
BMP5  
BMP7  
BMPR1A  
BMPR1B  
BMPR2  
BMX  
BPI  
BPTF  
BRAF  
BRCA1  
BRCA2  
BRD1  
BRD2  
BRD3  
BRD4  
BRD7  
BRD9  
BRDT  
BRPF1  
BRPF3  
BRS3  
BRSK1  
BRSK2  
BSG  
BST1  
BTC  
BTF3P11  
BTK  
BTN3A1  
BUB1  
C10ORF67  
C11ORF65  
C1QA  
C1R

C1S  
C3  
C3AR1  
C5  
C5AR1  
C5AR2  
C6ORF15  
C8ORF34  
C9ORF72  
CA1  
CA10  
CA12  
CA13  
CA14  
CA2  
CA3  
CA4  
CA5A  
CA5B  
CA6  
CA7  
CA9  
CACNA1A  
CACNA1B  
CACNA1C  
CACNA1D  
CACNA1E  
CACNA1F  
CACNA1G  
CACNA1H  
CACNA1I  
CACNA1S  
CACNA2D1  
CACNA2D2  
CACNA2D3  
CACNA2D4  
CACNB1  
CACNB2  
CACNB3  
CACNB4  
CACNG1  
CACNG2

CACNG3  
CACNG4  
CACNG5  
CACNG6  
CACNG7  
CADM2  
CALCA  
CALCB  
CALCR  
CALCRL  
CALM1  
CALR  
CALU  
CALY  
CAMK1  
CAMK1D  
CAMK2A  
CAMK2B  
CAMK2D  
CAMK2G  
CAMK4  
CAMKK1  
CAMKK2  
CAMLG  
CAMP  
CANX  
CAPG  
CAPN1  
CAPN10  
CAPN2  
CARD9  
CARM1  
CARTPT  
CASP1  
CASP10  
CASP12  
CASP14  
CASP2  
CASP3  
CASP4  
CASP5  
CASP6

CASP7  
CASP8  
CASP9  
CASR  
CAST  
CAT  
CATSPER1  
CATSPER2  
CATSPER3  
CATSPER4  
CAV1  
CBFB  
CBL  
CBLB  
CBLC  
CBR1  
CBR3  
CBS  
CBX1  
CCHCR1  
CCK  
CCKAR  
CCKBR  
CCL1  
CCL11  
CCL14  
CCL17  
CCL18  
CCL2  
CCL20  
CCL21  
CCL22  
CCL25  
CCL28  
CCL3  
CCL4  
CCL5  
CCL7  
CCL8  
CCN1  
CCN2  
CCNA2

CCNB1  
CCND1  
CCND2  
CCND3  
CCNE1  
CCNG1  
CCNK  
CCR1  
CCR10  
CCR2  
CCR3  
CCR4  
CCR5  
CCR6  
CCR7  
CCR8  
CCR9  
CCRL2  
CD14  
CD163  
CD19  
CD1A  
CD1D  
CD2  
CD200  
CD22  
CD244  
CD247  
CD248  
CD27  
CD274  
CD276  
CD28  
CD33  
CD34  
CD36  
CD37  
CD38  
CD3D  
CD3E  
CD3G  
CD4

CD40  
CD40LG  
CD44  
CD47  
CD5  
CD52  
CD55  
CD58  
CD59  
CD6  
CD63  
CD69  
CD7  
CD70  
CD74  
CD79B  
CD80  
CD82  
CD83  
CD84  
CD86  
CD8A  
CD9  
CDA  
CDC25A  
CDC25B  
CDC25C  
CDC37  
CDC42  
CDC42BPA  
CDC42BPB  
CDC5L  
CDC7  
CDH1  
CDH11  
CDH17  
CDH2  
CDH23  
CDH3  
CDH5  
CDK1  
CDK10

CDK11B  
CDK12  
CDK13  
CDK14  
CDK15  
CDK16  
CDK17  
CDK18  
CDK19  
CDK2  
CDK20  
CDK3  
CDK4  
CDK5  
CDK5R1  
CDK6  
CDK7  
CDK8  
CDK9  
CDKAL1  
CDKL1  
CDKL2  
CDKN1A  
CDKN1B  
CDKN1C  
CDKN2A  
CDKN2B  
CDKN2B-AS1  
CDKN2C  
CDKN2D  
CDKN3  
CDS1  
CDSN  
CDX2  
CEACAM1  
CEACAM3  
CEACAM5  
CEACAM6  
CEACAM7  
CEBPA  
CECR2  
CEL

CELA1  
CELF4  
CELSR2  
CENPE  
CEP43  
CEP68  
CEP72  
CERK  
CERKL  
CERS6  
CES1  
CES1P1  
CES2  
CETP  
CFAP44  
CFB  
CFD  
CFH  
CFHR4  
CFI  
CFL1  
CFLAR  
CFTR  
CGA  
CGB5  
CH25H  
CHAT  
CHD1  
CHD4  
CHEK1  
CHEK2  
CHI3L1  
CHIA  
CHKA  
CHN2  
CHPT1  
CHRM1  
CHRM2  
CHRM3  
CHRM4  
CHRM5  
CHRNA1

CHRNA10  
CHRNA2  
CHRNA3  
CHRNA4  
CHRNA5  
CHRNA6  
CHRNA7  
CHRNA9  
CHRNA1  
CHRNA2  
CHRNA4  
CHRND  
CHRNE  
CHRNG  
CHST1  
CHST11  
CHST3  
CHUK  
CHURC1  
CIC  
CIP2A  
CISH  
CKM  
CLC  
CLCA1  
CLCC1  
CLCN1  
CLCN2  
CLCN3  
CLCN4  
CLCN6  
CLCN7  
CLCNKA  
CLCNKB  
CLDN18  
CLEC12A  
CLEC4C  
CLEC4E  
CLK1  
CLK2  
CLK3  
CLK4

CLNK  
CLOCK  
CLU  
CMA1  
CMKLR1  
CMKLR2  
CMPK1  
CMTM8  
CNGA1  
CNGA2  
CNGA3  
CNPY4  
CNR1  
CNR2  
CNTF  
CNTFR  
COIL  
COL11A1  
COL11A2  
COL15A1  
COL18A1  
COL1A1  
COL1A2  
COL22A1  
COL24A1  
COL26A1  
COL27A1  
COL28A1  
COL2A1  
COL3A1  
COL4A1  
COL4A2  
COL4A3  
COL4A4  
COL4A5  
COL4A6  
COL5A1  
COL5A2  
COL5A3  
COL6A1  
COL6A2  
COL6A3

COL6A5  
COL6A6  
COMT  
COP1  
COQ2  
COQ8B  
CORO7  
CORT  
CP  
CPA1  
CPA2  
CPA6  
CPB1  
CPB2  
CPD  
CPM  
CPN1  
CPOX  
CPS1  
CPT1A  
CPT1B  
CPT2  
CR1  
CR2  
CRABP2  
CRAT  
CRBN  
CREB1  
CREBBP  
CRH  
CRHBP  
CRHR1  
CRHR2  
CRISPLD2  
CRKL  
CRLF2  
CRMP1  
CROT  
CRP  
CRTC1  
CRTC2  
CRY1

CRYBG2  
CRYGD  
CRYZ  
CSF1  
CSF1R  
CSF2  
CSF2RA  
CSF2RB  
CSF3  
CSF3R  
CSH1  
CSK  
CSMD1  
CSNK1A1  
CSNK1D  
CSNK1E  
CSNK1G1  
CSNK1G2  
CSNK1G3  
CSNK2A1  
CSNK2A2  
CSNK2A3  
CSPG4  
CSRNP3  
CSRP3  
CST3  
CST4  
CST5  
CTAG1B  
CTAG2  
CTDSP1  
CTF1  
CTH  
CTLA4  
CTNNA2  
CTNNA3  
CTNNB1  
CTNNB1  
CTNNB1  
CTPS1  
CTRC  
CTSA  
CTSB

CTSC  
CTSD  
CTSE  
CTSF  
CTSG  
CTSH  
CTSK  
CTSL  
CTSO  
CTSS  
CTSV  
CTSZ  
CUBN  
CUL4A  
CUX2  
CX3CL1  
CX3CR1  
CXCL10  
CXCL12  
CXCL13  
CXCL2  
CXCL5  
CXCL8  
CXCR1  
CXCR2  
CXCR3  
CXCR4  
CXCR5  
CXCR6  
CXXC4  
CYB5R1  
CYB5R2  
CYB5R3  
CYB5R4  
CYBA  
CYBB  
CYCSP5  
CYP11A1  
CYP11B1  
CYP11B2  
CYP17A1  
CYP19A1

CYP1A1  
CYP1A2  
CYP1B1  
CYP20A1  
CYP24A1  
CYP26A1  
CYP26B1  
CYP26C1  
CYP27A1  
CYP27B1  
CYP2A13  
CYP2A6  
CYP2A7P1  
CYP2B6  
CYP2C18  
CYP2C19  
CYP2C8  
CYP2C9  
CYP2D6  
CYP2E1  
CYP2F1  
CYP2J2  
CYP2R1  
CYP3A4  
CYP3A43  
CYP3A5  
CYP3A7  
CYP46A1  
CYP4A11  
CYP4B1  
CYP4F11  
CYP4F2  
CYP51A1  
CYP7A1  
CYP7B1  
CYSLTR1  
CYSLTR2  
CYTH2  
DAGLA  
DAGLB  
DAO  
DAOA

DAPK1  
DAPK3  
DBH  
DBI  
DBP  
DCAF4  
DCBLD1  
DCK  
DCLK1  
DCLK2  
DCLK3  
DCN  
DCPS  
DCT  
DCTD  
DDAH1  
DDB1  
DDC  
DDHD1  
DDIT3  
DDIT4  
DDO  
DDR1  
DDR2  
DDRGK1  
DDX43  
DDX5  
DEFA1  
DEFA4  
DEFA5  
DEGS1  
DEPTOR  
DES  
DFFB  
DGAT1  
DGAT2  
DGKB  
DHCR24  
DHCR7  
DHFR  
DHODH  
DHPS

DHRS9  
DHX36  
DIABLO  
DIAPH3  
DIO1  
DKC1  
DKK1  
DKK3  
DLG4  
DLG5  
DLK1  
DLL3  
DLL4  
DMD  
DMPK  
DNAH8  
DNAJB1  
DNASE1L3  
DNER  
DNMT1  
DNMT3A  
DNMT3B  
DNMT3L  
DNPEP  
DNTT  
DOCK10  
DOCK8  
DOK5  
DOT1L  
DPEP1  
DPP4  
DPP6  
DPP7  
DPP8  
DPP9  
DPYD  
DPYS  
DPYSL2  
DPYSL3  
DRAM1  
DRD1  
DRD2

DRD3  
DRD4  
DRD5  
DROSHA  
DSCAM  
DSE  
DSG1  
DSG3  
DSP  
DTNBP1  
DTYMK  
DUOX2  
DUSP1  
DUSP3  
DUSP6  
DUT  
DYNC2H1  
DYRK1A  
DYRK1B  
DYRK2  
DYRK3  
DYRK4  
E2F1  
E2F7  
EBP  
ECE1  
ECE2  
ECT2L  
EDA2R  
EDAR  
EDN1  
EDN3  
EDNRA  
EDNRB  
EED  
EEF1A1  
EEF2  
EEF2K  
EGF  
EGFL7  
EGFR  
EGLN1

EGLN2  
EGLN3  
EGR1  
EGR2  
EHMT1  
EHMT2  
EIF2AK1  
EIF2AK2  
EIF2AK3  
EIF2AK4  
EIF2B1  
EIF2S1  
EIF3A  
EIF4A1  
EIF4E  
EIF4EBP1  
EIF4G1  
EIF4H  
EIF5A  
ELANE  
ELAVL1  
ELK1  
ELN  
ELP5  
EML4  
EMP1  
EMP2  
ENG  
ENO2  
ENOSF1  
ENPEP  
ENPP2  
ENPP3  
ENTPD1  
ENTPD2  
EP300  
EPAS1  
EPB41  
EPCAM  
EPHA1  
EPHA10  
EPHA2

EPHA3  
EPHA4  
EPHA5  
EPHA6  
EPHA7  
EPHA8  
EPHB1  
EPHB2  
EPHB3  
EPHB4  
EPHB6  
EPHX1  
EPHX2  
EPM2A  
EPO  
EPOR  
EPRS1  
ERAP1  
ERAP2  
ERBB2  
ERBB3  
ERBB4  
ERCC1  
ERCC2  
ERCC3  
ERCC4  
ERCC5  
ERCC6  
EREG  
ERG  
ERICH3  
ERN1  
ERRF1  
ESR1  
ESR2  
ESRRA  
ESRRB  
ESRRG  
ESYT2  
ETFDH  
ETS2  
ETV1

ETV4  
ETV5  
ETV6  
EWSR1  
EXO1  
EYA2  
EYS  
EZH1  
EZH2  
EZR  
F10  
F11  
F12  
F13A1  
F13B  
F2  
F2R  
F2RL1  
F2RL2  
F2RL3  
F3  
F5  
F7  
F8  
F9  
FAAH  
FAAH2  
FABP1  
FABP3  
FABP4  
FABP5  
FADD  
FAM177A1  
FAM178B  
FANCA  
FANCC  
FANCD2  
FAP  
FARP2  
FAS  
FASLG  
FASN

FBP1  
FBP2  
FBXL17  
FBXL19  
FBXW7  
FCAR  
FCER1A  
FCER1G  
FCER2  
FCGR1A  
FCGR1CP  
FCGR2A  
FCGR2B  
FCGR3A  
FCGR3B  
FCGRT  
FCN2  
FDFT1  
FDPS  
FECH  
FEN1  
FER  
FES  
FFAR1  
FFAR2  
FFAR3  
FFAR4  
FGA  
FGB  
FGD4  
FGF1  
FGF18  
FGF19  
FGF2  
FGF21  
FGF22  
FGF23  
FGF3  
FGF4  
FGF6  
FGF7  
FGFR1

FGFR1OP2  
FGFR2  
FGFR3  
FGFR3P1  
FGFR4  
FGFRL1  
FGG  
FGR  
FH  
FHIT  
FHL2  
FIP1L1  
FKBP1A  
FKBP4  
FKBP5  
FLCN  
FLG  
FLI1  
FLNA  
FLT1  
FLT3  
FLT4  
FMO1  
FMO3  
FMO5  
FN1  
FNTA  
FNTB  
FOLH1  
FOLR1  
FOLR2  
FOLR3  
FOS  
FOSL1  
FOXC2  
FOXF2  
FOXL2  
FOXO1  
FOXO3  
FOXP3  
FPGS  
FPR1

FPR2  
FPR3  
FRK  
FSCN1  
FSHB  
FSHR  
FSIP1  
FST  
FTH1  
FTO  
FURIN  
FUS  
FUT2  
FUT3  
FUT4  
FXN  
FXR2  
FXD2  
FYN  
FZD1  
FZD2  
FZD4  
FZD5  
FZD6  
FZD7  
FZD8  
G6PD  
GAA  
GABBR1  
GABBR2  
GABPA  
GABRA1  
GABRA2  
GABRA3  
GABRA4  
GABRA5  
GABRA6  
GABRB1  
GABRB2  
GABRB3  
GABRD  
GABRE

GABRG1  
GABRG2  
GABRG3  
GABRP  
GABRQ  
GABRR1  
GABRR2  
GABRR3  
GAD1  
GAD2  
GADD45A  
GADD45G  
GAK  
GAL  
GALC  
GALK1  
GALNS  
GALNT14  
GALNT17  
GALNT18  
GALNT2  
GALP  
GALR1  
GALR2  
GALR3  
GALT  
GANAB  
GAPDH  
GAPVD1  
GART  
GAS6  
GAST  
GATA1  
GATA2  
GATA3  
GATA4  
GATM  
GBA  
GBP6  
GC  
GCG  
GCCGR

GCH1  
GCK  
GCKR  
GCLC  
GCLM  
GDA  
GDF15  
GDF2  
GDF5  
GDNF  
GEM  
GET1  
GFAP  
GFER  
GFRA1  
GFRA3  
GFRAL  
GGCT  
GGCX  
GGH  
GGPS1  
GGT1  
GH1  
GHR  
GHRH  
GHRHR  
GHRL  
GHSR  
GIPR  
GJA1  
GJA10  
GJA3  
GJA4  
GJA5  
GJA8  
GJA9  
GJB1  
GJB2  
GJB3  
GJB4  
GJB5  
GJB6

GJB7  
GJC1  
GJC2  
GJC3  
GJD2  
GJD3  
GJD4  
GJE1  
GLA  
GLCCI1  
GLDC  
GLI1  
GLIPR1  
GLO1  
GLP1R  
GLP2R  
GLRA1  
GLRA2  
GLRA3  
GLRB  
GLS  
GM2A  
GMNN  
GNA11  
GNA13  
GNAQ  
GNAS  
GNB3  
GNE  
GNL3  
GNMT  
GNRH1  
GNRHR  
GNRHR2  
GP1BA  
GP6  
GPA33  
GPBAR1  
GPC3  
GPD2  
GPER1  
GPI

GPNMB  
GPR119  
GPR12  
GPR132  
GPR139  
GPR142  
GPR143  
GPR15  
GPR17  
GPR174  
GPR18  
GPR183  
GPR19  
GPR3  
GPR32  
GPR34  
GPR35  
GPR37  
GPR37L1  
GPR39  
GPR4  
GPR52  
GPR55  
GPR63  
GPR68  
GPR75  
GPR83  
GPR84  
GPR87  
GPR88  
GPRC6A  
GPT  
GPX1  
GPX5  
GRAMD1B  
GRB14  
GRB2  
GREM2  
GRIA1  
GRIA2  
GRIA3  
GRIA4

GRID2  
GRIK1  
GRIK2  
GRIK3  
GRIK4  
GRIK5  
GRIN1  
GRIN2A  
GRIN2B  
GRIN2C  
GRIN2D  
GRIN3A  
GRIN3B  
GRK1  
GRK2  
GRK3  
GRK4  
GRK5  
GRK6  
GRK7  
GRM1  
GRM2  
GRM3  
GRM4  
GRM5  
GRM6  
GRM7  
GRM8  
GRP  
GRPR  
GSK3A  
GSK3B  
GSR  
GSTA1  
GSTM1  
GSTM3  
GSTO1  
GSTP1  
GSTT1  
GSTZ1  
GTF2B  
GUCA2A

GUCA2B  
GUCY1A1  
GUCY1A2  
GUCY1B1  
GUCY1B2  
GUCY2C  
GUCY2D  
GUSB  
GYPA  
GZMA  
GZMB  
H19  
H2AW  
H2AX  
H3-3A  
H3C2  
H4-16  
HAMP  
HAS3  
HASPIN  
HAVCR2  
HBA2  
HBB  
HBEGF  
HCAR1  
HCAR2  
HCAR3  
HCG22  
HCK  
HCN1  
HCN2  
HCN3  
HCN4  
HCP5  
HCRTR1  
HCRTR2  
HDAC1  
HDAC10  
HDAC11  
HDAC2  
HDAC3  
HDAC4

HDAC5  
HDAC6  
HDAC7  
HDAC8  
HDAC9  
HDC  
HDGF  
HEBP1  
HERC2  
HES1  
HEXA  
HEXB  
HFE  
HGF  
HIF1A  
HIF1AN  
HINT1  
HIPK1  
HIPK2  
HIPK3  
HIPK4  
HK1  
HK2  
HKDC1  
HLA-A  
HLA-B  
HLA-C  
HLA-DPA1  
HLA-DPB1  
HLA-DPB2  
HLA-DQA1  
HLA-DQB1  
HLA-DRA  
HLA-DRB1  
HLA-DRB2  
HLA-DRB3  
HLA-DRB4  
HLA-DRB5  
HLA-E  
HLA-G  
HMBS  
HMGB1

HMGCR  
HMGCS1  
HMGCS2  
HMMR  
HMOX1  
HMOX2  
HNF1A  
HNF1B  
HNF4A  
HNMT  
HNRNPA1  
HNRNPC  
HNRNPH2  
HOMER1  
HOTAIR  
HOXA9  
HOXB1  
HOXD1  
HP  
HPD  
HPGD  
HPGDS  
HPN  
HPRT1  
HPSE  
HR  
HRAS  
HRH1  
HRH2  
HRH3  
HRH4  
HSD11B1  
HSD11B2  
HSD17B10  
HSD17B2  
HSD17B3  
HSD3B1  
HSD3B2  
HSD3B7  
HSF1  
HSP90AA1  
HSP90AA2P

HSP90AB1  
HSP90B1  
HSP90B2P  
HSPA1A  
HSPA1L  
HSPA4  
HSPA5  
HSPA8  
HSPA9  
HSPB1  
HSPB2  
HSPB6  
HSPD1  
HSPE1  
HSPG2  
HTR1A  
HTR1B  
HTR1D  
HTR1E  
HTR1F  
HTR2A  
HTR2B  
HTR2C  
HTR3A  
HTR3B  
HTR3C  
HTR3D  
HTR3E  
HTR4  
HTR5A  
HTR6  
HTR7  
HTRA1  
HTT  
HUS1  
HVCN1  
HYAL2  
HYKK  
HYOU1  
IAPP  
IBSP  
ICA1

ICAM1  
ICAM2  
ICAM3  
ICMT  
ICOS  
ICOSLG  
IDE  
IDH1  
IDH2  
IDI1  
IDO1  
IDO2  
IDS  
IFI27  
IFIT2  
IFNA1  
IFNA2  
IFNA5  
IFNAR1  
IFNAR2  
IFNB1  
IFNG  
IFNGR1  
IFNGR2  
IFNL1  
IFNL3  
IFNL4  
IFNLR1  
IFNR  
IFNW1  
IGF1  
IGF1R  
IGF2  
IGF2-AS  
IGF2BP2  
IGF2R  
IGFBP1  
IGFBP3  
IGFBP4  
IGFBP5  
IGFBP6  
IGH

IGHE  
IGHG1  
IHH  
IKBKB  
IKBKE  
IKBKG  
IKZF1  
IL10  
IL10RA  
IL10RB  
IL11  
IL11RA  
IL12A  
IL12B  
IL12RB2  
IL13  
IL13RA1  
IL13RA2  
IL15  
IL15RA  
IL16  
IL17A  
IL17B  
IL17C  
IL17F  
IL17RA  
IL17RC  
IL18  
IL1A  
IL1B  
IL1R1  
IL1R2  
IL1RL2  
IL1RN  
IL2  
IL20  
IL21  
IL21R  
IL22  
IL23A  
IL23R  
IL24

IL25  
IL27  
IL2RA  
IL2RB  
IL2RG  
IL3  
IL31  
IL31RA  
IL33  
IL37  
IL3RA  
IL4  
IL4R  
IL5  
IL5RA  
IL6  
IL6R  
IL6ST  
IL7  
IL7R  
IL9  
IL9R  
ILF3  
ILK  
ILKAP  
IMPA1  
IMPDH1  
IMPDH2  
INHA  
INHBA  
INHBE  
INPP1  
INPP5A  
INPP5D  
INPPL1  
INS  
INSIG2  
INS-IGF2  
INSR  
INSRR  
INVS  
IPO11

IPO13  
IPO4  
IPO7  
IPO8  
IPO9  
IRAK1  
IRAK3  
IRAK4  
IRF1  
IRF1-AS1  
IRF2  
IRF3  
IRF6  
IRS1  
IRS2  
ISG15  
ITGA1  
ITGA11  
ITGA2  
ITGA2B  
ITGA3  
ITGA4  
ITGA5  
ITGAL  
ITGAM  
ITGAV  
ITGAX  
ITGB1  
ITGB2  
ITGB3  
ITGB5  
ITGB6  
ITGB7  
ITGB8  
ITIH3  
ITK  
ITPA  
ITPKA  
ITPKB  
ITPKC  
ITPR1  
ITPR2

ITPR3  
IVL  
JAG1  
JAK1  
JAK2  
JAK3  
JUN  
JUNB  
JUND  
KAT2A  
KAT2B  
KAT5  
KAT8  
KCNA1  
KCNA10  
KCNA2  
KCNA3  
KCNA4  
KCNA5  
KCNA6  
KCNA7  
KCNB1  
KCNB2  
KCNC1  
KCNC2  
KCNC3  
KCNC4  
KCND1  
KCND2  
KCND3  
KCNE1  
KCNF1  
KCNG1  
KCNG2  
KCNG3  
KCNH1  
KCNH2  
KCNH3  
KCNH4  
KCNH5  
KCNH6  
KCNH7

KCNH8  
KCNIP1  
KCNIP4  
KCNJ1  
KCNJ10  
KCNJ11  
KCNJ12  
KCNJ13  
KCNJ14  
KCNJ2  
KCNJ3  
KCNJ4  
KCNJ5  
KCNJ6  
KCNJ8  
KCNJ9  
KCNK10  
KCNK12  
KCNK13  
KCNK16  
KCNK17  
KCNK18  
KCNK2  
KCNK3  
KCNK4  
KCNK5  
KCNK9  
KCNMA1  
KCNMB1  
KCNN1  
KCNN2  
KCNN3  
KCNN4  
KCNQ1  
KCNQ2  
KCNQ3  
KCNQ4  
KCNQ5  
KCNS1  
KCNS2  
KCNS3  
KCNT1

KCNT2  
KCNU1  
KCNV1  
KCNV2  
KDM1A  
KDM1B  
KDM2A  
KDM3A  
KDM4A  
KDM4C  
KDM4D  
KDM4E  
KDM5A  
KDM5B  
KDM5C  
KDM6A  
KDM6B  
KDM7A  
KDR  
KEAP1  
KHK  
KHSRP  
KIF11  
KIF6  
KIR2DL1  
KIR2DL2  
KIR2DL3  
KIR2DS1  
KIR2DS2  
KIR2DS4  
KIR3DL2  
KIR3DL3  
KISS1  
KISS1R  
KIT  
KL  
KLB  
KLC1  
KLC3  
KLF4  
KLF5  
KLK1

KLK14  
KLK2  
KLK3  
KLK4  
KLK5  
KLK6  
KLK7  
KLK8  
KLKB1  
KLRC1  
KLRD1  
KLRK1  
KMO  
KMT2A  
KMT2C  
KMT2D  
KMT2E  
KMT5A  
KMT5B  
KMT5C  
KNG1  
KRAS  
KRT10  
KRT17  
KRT18  
KRT19  
KRT20  
KRT6A  
KYAT1  
L1CAM  
L3MBTL1  
L3MBTL3  
LAG3  
LAMA1  
LAMA2  
LAMA3  
LAMA4  
LAMA5  
LAMB1  
LAMB2  
LAMB3  
LAMB4

LAMC2  
LAMC3  
LAMP1  
LANCL2  
LAP3  
LAT  
LATS2  
LCAT  
LCK  
LCT  
LDHA  
LDLR  
LEP  
LEPR  
LGALS1  
LGALS2  
LGALS3  
LGALS8  
LGALS9  
LGMN  
LGR4  
LGR5  
LGR6  
LHCGR  
LHFPL3  
LIF  
LIFR  
LIG1  
LIG3  
LILRA4  
LIMK1  
LIMK2  
LINC00251  
LINGO1  
LIPA  
LIPC  
LIPE  
LIPF  
LIPG  
LKAAEAR1  
LMNA  
LMO2

LNPEP  
LOH19CR1  
LOX  
LOXL2  
LPA  
LPAR1  
LPAR2  
LPAR3  
LPAR4  
LPAR5  
LPAR6  
LPIN1  
LPL  
LPO  
LRMDA  
LRP1  
LRP1B  
LRP2  
LRRC15  
LRRC59  
LRRK2  
LSS  
LST1  
LTA  
LTA4H  
LTB  
LTB4R  
LTB4R2  
LTBR  
LTC4S  
LTF  
LTK  
LUM  
LVRN  
LY96  
LYN  
LYVE1  
M6PR  
MAD1L1  
MADCAM1  
MAFB  
MAFK

MAG  
MAGEA1  
MAGEA12  
MAGEA3  
MAGEA4  
MAGEC1  
MAGEC2  
MALAT1  
MALT1  
MAN2C1  
MAOA  
MAOB  
MAP2  
MAP2K1  
MAP2K2  
MAP2K3  
MAP2K4  
MAP2K5  
MAP2K6  
MAP2K7  
MAP3K1  
MAP3K10  
MAP3K11  
MAP3K12  
MAP3K13  
MAP3K14  
MAP3K19  
MAP3K2  
MAP3K20  
MAP3K3  
MAP3K5  
MAP3K6  
MAP3K7  
MAP3K8  
MAP3K9  
MAP4K2  
MAP4K3  
MAP4K4  
MAP4K5  
MAPK1  
MAPK10  
MAPK11

MAPK12  
MAPK13  
MAPK14  
MAPK15  
MAPK3  
MAPK4  
MAPK6  
MAPK7  
MAPK8  
MAPK9  
MAPKAP1  
MAPKAPK2  
MAPKAPK3  
MAPKAPK5  
MAPT  
MARCHF8  
MARCKS  
MARCKSL1  
MARK1  
MARK2  
MARK3  
MARK4  
MAS1  
MASP2  
MAST3  
MAT1A  
MAT2A  
MATK  
MAZ  
MBD4  
MBL2  
MBNL1  
MBOAT4  
MBP  
MBTPS1  
MC1R  
MC2R  
MC3R  
MC4R  
MC5R  
MCAM  
MCHR1

MCHR2  
MCL1  
MCM8  
MCOLN1  
MCOLN2  
MCOLN3  
MDGA2  
MDH2  
MDK  
MDM2  
MDM4  
ME3  
MED12L  
MED19  
MEG3  
MEGF11  
MELK  
MEN1  
MERTK  
MET  
METAP1  
METAP1D  
METAP2  
METTL21A  
MEX3C  
MFGE8  
MGA  
MGAM  
MGAT2  
MGAT4A  
MGLL  
MGMT  
MIA  
MICA  
MICB  
MICU1  
MID1  
MIEF2  
MIF  
MINK1  
MIP  
MIR125B2

MIR155  
MIR2054  
MIR21  
MIR27A  
MIR582  
MITF  
MKNK1  
MKNK2  
MLANA  
MLC1  
MLH1  
MLKL  
MLLT3  
MLNR  
MLST8  
MLYCD  
MME  
MMP1  
MMP10  
MMP11  
MMP12  
MMP13  
MMP14  
MMP15  
MMP16  
MMP17  
MMP2  
MMP21  
MMP25  
MMP26  
MMP3  
MMP7  
MMP8  
MMP9  
MMUT  
MOB3B  
MOBP  
MOCS1  
MPHOSPH8  
MPI  
MPL  
MPO

MPST  
MR1  
MRGPRD  
MRGPRX1  
MRGPRX2  
MRM2  
MS4A1  
MS4A2  
MSANTD1  
MSH2  
MSH5  
MSH6  
MSLN  
MSMB  
MSR1  
MST1  
MST1R  
MSTN  
MT1A  
MT1E  
MT1F  
MT1G  
MT1H  
MT1IP  
MT1JP  
MT2A  
MT3  
MTAP  
MT-CO1  
MT-CO2  
MTF1  
MTHFR  
MT-ND1  
MT-ND2  
MT-ND3  
MT-ND4  
MT-ND4L  
MT-ND5  
MT-ND6  
MTNR1A  
MTNR1B  
MTOR

MTR  
MTRF1L  
MT-RNR1  
MTRR  
MTTP  
MUC1  
MUC16  
MUC2  
MUC5AC  
MUCL3  
MUSK  
MUTYH  
MVD  
MVK  
MXI1  
MYB  
MYBPC3  
MYC  
MYCN  
MYD88  
MYH14  
MYH6  
MYH7  
MYH7B  
MYL2  
MYL3  
MYL7  
MYLIP  
MYLK  
MYLK2  
MYO1H  
MYO9B  
MYOD1  
MYT1L  
N6AMT1  
NAAA  
NAE1  
NAGLU  
NAGS  
NALCN  
NAMPT  
NAPEPLD

NAPRT  
NAT1  
NAT2  
NBEA  
NBN  
NCAM1  
NCF1  
NCF2  
NCF4  
NCK1  
NCL  
NCOA1  
NCOA2  
NCOA3  
NCOR2  
NCSTN  
NDUFA1  
NDUFA10  
NDUFA11  
NDUFA12  
NDUFA13  
NDUFA2  
NDUFA3  
NDUFA4  
NDUFA4L2  
NDUFA5  
NDUFA6  
NDUFA7  
NDUFA8  
NDUFA9  
NDUFAB1  
NDUFAF1  
NDUFAF2  
NDUFAF3  
NDUFAF4  
NDUFB1  
NDUFB10  
NDUFB11  
NDUFB2  
NDUFB3  
NDUFB4  
NDUFB5

NDUFB6  
NDUFB7  
NDUFB8  
NDUFB9  
NDUFC1  
NDUFC2  
NDUFS1  
NDUFS2  
NDUFS3  
NDUFS4  
NDUFS5  
NDUFS6  
NDUFS7  
NDUFS8  
NDUFV1  
NDUFV2  
NDUFV3  
NECTIN4  
NEDD4  
NEDD4L  
NEDD8  
NEK1  
NEK11  
NEK2  
NEK3  
NEK4  
NEK6  
NEK7  
NELFCD  
NEU3  
NEUROD1  
NF1  
NF2  
NFATC2  
NFE2  
NFE2L2  
NFIB  
NFKB1  
NFKB2  
NFKBIA  
NFKBIB  
NFKBIL1

NGB  
NGF  
NGFR  
NIM1K  
NKX6-1  
NLK  
NLRP1  
NLRP3  
NMBR  
NME1  
NME2  
NMUR1  
NMUR2  
NNMT  
NOD1  
NOD2  
NODAL  
NOS1  
NOS1AP  
NOS2  
NOS3  
NOTCH1  
NOTCH2  
NOTCH3  
NOTCH4  
NOX1  
NOX4  
NOX5  
NPBWR1  
NPBWR2  
NPC1  
NPC1L1  
NPEPL1  
NPEPPS  
NPFFR1  
NPFFR2  
NPHS1  
NPIP8  
NPM1  
NPPA  
NPPA-AS1  
NPPC

NPR1  
NPR2  
NPR3  
NPSR1  
NPTN  
NPTX2  
NPTXR  
NPY  
NPY1R  
NPY2R  
NPY4R  
NPY5R  
NQO1  
NQO2  
NR0B1  
NR0B2  
NR1D1  
NR1D2  
NR1H2  
NR1H3  
NR1H4  
NR1I2  
NR1I3  
NR2C1  
NR2C2  
NR2E1  
NR2E3  
NR2F2  
NR3C1  
NR3C2  
NR4A1  
NR4A3  
NR5A1  
NR5A2  
NR6A1  
NRAS  
NRG1  
NRG2  
NRG3  
NRIP1  
NRP1  
NRP2

NRXN1  
NSD2  
NT5C  
NT5C1A  
NT5C2  
NT5C3A  
NT5E  
NTF3  
NTF4  
NTNG1  
NTRK1  
NTRK2  
NTRK3  
NTS  
NTSR1  
NTSR2  
NUAK1  
NUAK2  
NUBPL  
NUCB1  
NUCB2  
NUDT1  
NUDT15  
NUDT7  
NUMA1  
NUP107  
NUP50  
OASL  
OAT  
OCLN  
OCRL  
ODC1  
OGA  
OGDH  
OGFR  
OGG1  
OLR1  
OPCML  
OPLAH  
OPN1LW  
OPRD1  
OPRK1

OPRL1  
OPRM1  
OR52E2  
OR52J2P  
OR52J3  
ORAI1  
ORAI2  
ORM2  
OSM  
OTC  
OTOS  
OXER1  
OXGR1  
OXSR1  
OXT  
OXTR  
P2RX1  
P2RX2  
P2RX3  
P2RX4  
P2RX7  
P2RY1  
P2RY10  
P2RY11  
P2RY12  
P2RY13  
P2RY14  
P2RY2  
P2RY4  
P2RY6  
P2RY8  
P3H3  
P4HA1  
P4HB  
P4HTM  
PABPC1  
PACSIN2  
PADI1  
PADI2  
PADI3  
PADI4  
PAEP

PAH  
PAK1  
PAK2  
PAK3  
PAK4  
PAK5  
PAK6  
PALB2  
PANX1  
PANX2  
PANX3  
PAPLN  
PAPOLA  
PAPPA  
PARD3B  
PARG  
PARP1  
PARP11  
PARP2  
PARP3  
PASK  
PAX2  
PAX4  
PAX5  
PAX8  
PBK  
PBRM1  
PC  
PCBD1  
PCLAF  
PCNA  
PCSK1  
PCSK2  
PCSK4  
PCSK5  
PCSK6  
PCSK7  
PCSK9  
PCYT1A  
PCYT1B  
PCYT2  
PDCD1

PDCD1LG2  
PDCD4  
PDE10A  
PDE11A  
PDE1A  
PDE1B  
PDE1C  
PDE2A  
PDE3A  
PDE3B  
PDE4A  
PDE4B  
PDE4C  
PDE4D  
PDE5A  
PDE6A  
PDE6B  
PDE6C  
PDE6D  
PDE6G  
PDE6H  
PDE7A  
PDE7B  
PDE8A  
PDE8B  
PDE9A  
PDF  
PDGFA  
PDGFB  
PDGFC  
PDGFD  
PDGFRA  
PDGFRB  
PDHA1  
PDHA2  
PDHB  
PDHX  
PDIA2  
PDK1  
PDK2  
PDK3  
PDK4

PDPK1  
PDYN  
PEAR1  
PEBP1  
PEBP4  
PECAM1  
PEMT  
PER1  
PERP  
PFKFB3  
PGA3  
PGA5  
PGAP6  
PGC  
PGD  
PGF  
PGGT1B  
PGK1  
PGLYRP4  
PGM1  
PGP  
PGR  
PGRMC1  
PHB2  
PHEX  
PHF8  
PHKG1  
PHKG2  
PHOSPHO1  
PI3  
PI4K2A  
PI4K2B  
PI4KA  
PI4KB  
PICALM  
PICK1  
PIEZO1  
PIGF  
PIGM  
PIK3C2A  
PIK3C2B  
PIK3C2G

PIK3C3  
PIK3CA  
PIK3CB  
PIK3CD  
PIK3CG  
PIK3R1  
PIK3R2  
PIK3R3  
PIK3R4  
PIK3R5  
PIK3R6  
PIKFYVE  
PIM1  
PIM2  
PIM3  
PIN1  
PIP  
PIP4K2A  
PIP5K1A  
PIP5K1C  
PIPSL  
PKD2  
PKD2L1  
PKM  
PKMYT1  
PKN1  
PKN2  
PKN3  
PLA2G10  
PLA2G1B  
PLA2G2A  
PLA2G2D  
PLA2G2E  
PLA2G2F  
PLA2G3  
PLA2G4A  
PLA2G5  
PLA2G6  
PLA2G7  
PLAT  
PLAU  
PLAUR

PLCB1  
PLCD3  
PLCE1  
PLCG1  
PLCG2  
PLD1  
PLD2  
PLEKHA6  
PLEKHH2  
PLEKHJ1  
PLG  
PLIN1  
PLIN3  
PLK1  
PLK2  
PLK3  
PLK4  
PLOD1  
PLTP  
PMAIP1  
PMCH  
PMEL  
PML  
PMM2  
PMP22  
PMS2  
PMVK  
PNLIP  
PNMT  
PNOC  
PNP  
PNPLA3  
POLA1  
POLA2  
POLB  
POLD1  
POLE  
POLG  
POLH  
POLI  
POLK  
POLL

POLR1G  
POLR2A  
POLR3G  
POLRMT  
POM121L2  
PON1  
PON2  
POR  
PORCN  
POSTN  
POU2F2  
POU5F1  
PPA1  
PPA2  
PPARA  
PPARD  
PPARG  
PPAT  
PPCDC  
PPIA  
PPIB  
PPID  
PPIG  
PPM1A  
PPM1D  
PPME1  
PPOX  
PPP1CA  
PPP1R13L  
PPP1R18  
PPP1R1A  
PPP1R1B  
PPP2CA  
PPP2R5D  
PPP3CA  
PPP3CB  
PPP3CC  
PPP3R2  
PPT1  
PPY  
PRB2  
PRCP

PRDX1  
PRDX4  
PRDX5  
PREP  
PREX2  
PRF1  
PRIM1  
PRKAA1  
PRKAA2  
PRKAB1  
PRKAB2  
PRKACA  
PRKACB  
PRKACG  
PRKAG1  
PRKAG2  
PRKAG3  
PRKAR2B  
PRKCA  
PRKCB  
PRKCD  
PRKCE  
PRKCG  
PRKCH  
PRKCI  
PRKCQ  
PRKCZ  
PRKD1  
PRKD2  
PRKD3  
PRKDC  
PRKG1  
PRKG2  
PRKX  
PRL  
PRLHR  
PRLR  
PRMT1  
PRMT3  
PRMT5  
PRMT6  
PRMT7

PRMT8  
PRNP  
PROC  
PROCR  
PROKR1  
PROKR2  
PROM1  
PRORP  
PROS1  
PROX1  
PROZ  
PRPF31  
PRPS1  
PRRC2A  
PRRT2  
PRSS1  
PRSS2  
PRSS3  
PRSS53  
PRSS8  
PRTN3  
PSCA  
PSEN1  
PSEN2  
PSENEN  
PSIP1  
PSMA1  
PSMA2  
PSMA3  
PSMA4  
PSMA5  
PSMA6  
PSMA7  
PSMA8  
PSMB1  
PSMB10  
PSMB11  
PSMB2  
PSMB3  
PSMB4  
PSMB5  
PSMB6

PSMB7  
PSMB8  
PSMB9  
PSMC1  
PSMC1P1  
PSMC2  
PSMC3  
PSMC3IP  
PSMC4  
PSMC5  
PSMC6  
PSMD1  
PSMD10  
PSMD10P1  
PSMD10P2  
PSMD10P3  
PSMD11  
PSMD12  
PSMD13  
PSMD14  
PSMD2  
PSMD3  
PSMD4  
PSMD4P1  
PSMD5  
PSMD6  
PSMD7  
PSMD8  
PSMD9  
PSME1  
PSME2  
PSME2P2  
PSME3  
PSME4  
PSMF1  
PSORS1C1  
PSORS1C3  
PSPH  
PTAFR  
PTBP1  
PTCH1  
PTEN

PTGDR  
PTGDR2  
PTGDS  
PTGER1  
PTGER2  
PTGER3  
PTGER4  
PTGES  
PTGES2  
PTGES3  
PTGFR  
PTGIR  
PTGIS  
PTGS1  
PTGS2  
PTH  
PTH1R  
PTH2R  
PTHLH  
PTK2  
PTK2B  
PTK6  
PTK7  
PTMA  
PTP4A1  
PTP4A3  
PTPA  
PTPN1  
PTPN11  
PTPN12  
PTPN13  
PTPN22  
PTPN4  
PTPN5  
PTPN6  
PTPN7  
PTPRB  
PTPRC  
PTPRD  
PTPRF  
PTPRG  
PTPRM

PTPRS  
PTPRZ1  
PURA  
PVALB  
PVT1  
PXN  
PYGB  
PYGL  
PYGM  
PYY  
PZP  
QPCT  
QPRT  
QRFPR  
RAB27A  
RAB5A  
RAB9A  
RABEP1  
RABGAP1L  
RAC1  
RAC2  
RACGAP1  
RAD21  
RAD50  
RAD51  
RAD52  
RAD54L  
RAF1  
RALA  
RALBP1  
RAMP1  
RAMP2  
RAMP3  
RAPGEF3  
RAPGEF4  
RAPGEF5  
RARA  
RARB  
RARG  
RARRES1  
RARS1  
RASA1

RASGRP1  
RASGRP3  
RB1  
RBBP9  
RBFox1  
RBL1  
RBL2  
RBMS3  
RBP3  
RBP4  
RBX1  
RCE1  
RCSD1  
RECQL  
REEP5  
REG1A  
REG3A  
RELA  
REN  
RET  
REV1  
REV3L  
RFC1  
RFK  
RFPL4B  
RGL4  
RGMA  
RGS12  
RGS16  
RGS17  
RGS19  
RGS2  
RGS4  
RGS5  
RGS8  
RHAG  
RHBDF2  
RHD  
RHEB  
RHO  
RHOA  
RHOB

RICTOR  
RIPK1  
RIPK2  
RIPK3  
RIPOR2  
RIT1  
RLN2  
RNASE1  
RNASEH2A  
RNASEL  
RNF112  
RNF43  
RNF8  
RNPEP  
RNPEPL1  
ROCK1  
ROCK2  
ROR1  
ROR2  
RORA  
RORB  
RORC  
ROS1  
RPA1  
RPE65  
RPL10  
RPL13  
RPS19  
RPS2  
RPS6KA1  
RPS6KA2  
RPS6KA3  
RPS6KA4  
RPS6KA5  
RPS6KA6  
RPS6KB1  
RPS6KB2  
RPSA  
RPTOR  
RRAS2  
RRM1  
RRM2

RRM2B  
RRP1B  
RRP7A  
RSPO1  
RSPO3  
RTKN2  
RTN4  
RUNX1  
RUNX2  
RUNX3  
RXFP1  
RXFP2  
RXFP3  
RXFP4  
RXRA  
RXRB  
RXRG  
RYR1  
RYR2  
RYR3  
S100A10  
S100A12  
S100A2  
S100A4  
S100A8  
S100A9  
S100B  
S1PR1  
S1PR2  
S1PR3  
S1PR4  
S1PR5  
SAA1  
SACM1L  
SAE1  
SAG  
SAMD3  
SAMHD1  
SAP130  
SBK3  
SCAP  
SCARB1

SCD  
SCG5  
SCGB1A1  
SCN10A  
SCN11A  
SCN1A  
SCN1B  
SCN2A  
SCN2B  
SCN3A  
SCN3B  
SCN4A  
SCN4B  
SCN5A  
SCN7A  
SCN8A  
SCN9A  
SCNN1A  
SCNN1B  
SCNN1D  
SCNN1G  
SCTR  
SDC1  
SDC2  
SDF4  
SDHB  
SDS  
SELE  
SELL  
SELP  
SELPLG  
SEM1  
SEMA3C  
SEMA4D  
SENP1  
SENP2  
SENP3  
SENP6  
SENP7  
SENP8  
SERPINA1  
SERPINA3

SERPINA5  
SERPINA6  
SERPINB2  
SERPINB3  
SERPINC1  
SERPIND1  
SERPINE1  
SERPINF1  
SERPING1  
SERPINH1  
SETBP1  
SETD2  
SETD4  
SETD7  
SF3B1  
SF3B2  
SF3B3  
SFN  
SFRP5  
SFTPA1  
SFTPB  
SGCA  
SGK1  
SGK2  
SGK3  
SGMS1  
SGMS2  
SGPL1  
SGSH  
SGSM3  
SH2B1  
SH2B3  
SH2D1A  
SH2D5  
SHBG  
SHH  
SHMT1  
SI  
SIAH1  
SIGIRR  
SIGMAR1  
SIK1

SIK2  
SIK3  
SIRT1  
SIRT2  
SIRT3  
SIRT5  
SIRT6  
SLAMF1  
SLAMF6  
SLAMF7  
SLC10A1  
SLC10A2  
SLC11A1  
SLC11A2  
SLC12A1  
SLC12A2  
SLC12A3  
SLC12A4  
SLC12A5  
SLC12A6  
SLC12A7  
SLC12A8  
SLC14A1  
SLC14A2  
SLC15A1  
SLC15A2  
SLC15A3  
SLC15A4  
SLC16A1  
SLC16A3  
SLC16A5  
SLC16A7  
SLC17A9  
SLC18A1  
SLC18A2  
SLC18A3  
SLC19A1  
SLC19A2  
SLC19A3  
SLC1A1  
SLC1A2  
SLC1A3

SLC1A5  
SLC1A6  
SLC1A7  
SLC22A1  
SLC22A11  
SLC22A12  
SLC22A16  
SLC22A2  
SLC22A3  
SLC22A4  
SLC22A5  
SLC22A6  
SLC22A7  
SLC22A8  
SLC22A9  
SLC23A1  
SLC23A2  
SLC25A1  
SLC25A20  
SLC25A29  
SLC25A31  
SLC25A4  
SLC25A5  
SLC25A6  
SLC26A8  
SLC26A9  
SLC27A1  
SLC27A4  
SLC28A1  
SLC28A2  
SLC28A3  
SLC29A1  
SLC29A2  
SLC29A3  
SLC29A4  
SLC2A1  
SLC2A2  
SLC2A3  
SLC2A4  
SLC2A5  
SLC30A8  
SLC30A9

SLC31A1  
SLC32A1  
SLC33A1  
SLC34A2  
SLC36A1  
SLC36A2  
SLC38A1  
SLC38A2  
SLC38A3  
SLC38A4  
SLC38A5  
SLC39A14  
SLC39A6  
SLC39A8  
SLC3A2  
SLC40A1  
SLC44A1  
SLC44A4  
SLC46A1  
SLC47A1  
SLC47A2  
SLC4A1  
SLC4A8  
SLC5A1  
SLC5A11  
SLC5A2  
SLC5A3  
SLC5A4  
SLC5A5  
SLC5A6  
SLC5A7  
SLC5A8  
SLC6A1  
SLC6A11  
SLC6A12  
SLC6A14  
SLC6A15  
SLC6A19  
SLC6A2  
SLC6A3  
SLC6A4  
SLC6A5

SLC6A7  
SLC6A9  
SLC7A11  
SLC7A5  
SLC8A3  
SLC9A1  
SLC9A3  
SLC9A5  
SLCO1A2  
SLCO1B1  
SLCO1B3  
SLCO1C1  
SLCO2A1  
SLCO2B1  
SLCO3A1  
SLCO4A1  
SLCO4C1  
SLFN11  
SLIT1  
SLITRK6  
SLK  
SLPI  
SMAD2  
SMAD3  
SMAD4  
SMAD7  
SMARCA2  
SMARCA4  
SMARCB1  
SMG1  
SMN1  
SMN2  
SMO  
SMOX  
SMPD1  
SMS  
SMTN  
SMYD2  
SNAP25  
SNCA  
SNORD68  
SNW1

SOAT1  
SOCS1  
SOCS3  
SOCS6  
SOD1  
SOD2  
SORCS2  
SOS1  
SOST  
SOX10  
SP1  
SP3  
SP7  
SPARC  
SPATA5  
SPECC1L  
SPECC1L-ADORA2A  
SPG7  
SPHK1  
SPHK2  
SPINT1  
SPOPL  
SPP1  
SPR  
SPSB2  
SPTBN1  
SPTLC2  
SPTLC3  
SQLE  
SQSTM1  
SRC  
SRD5A1  
SRD5A2  
SRD5A3  
SREBF1  
SRGN  
SRI  
SRMS  
SRP19  
SRPK1  
SRPK2  
SRPK3

SRPRB  
SRSF10  
SRSF2  
SRY  
SSRP1  
SST  
SSTR1  
SSTR2  
SSTR3  
SSTR4  
SSTR5  
ST13  
ST14  
ST6GAL1  
STAB2  
STAG2  
STAG3  
STAR  
STAT1  
STAT2  
STAT3  
STAT4  
STAT5A  
STAT5B  
STAT6  
STEAP1  
STIM2  
STING1  
STK10  
STK11  
STK16  
STK17A  
STK24  
STK3  
STK31  
STK32B  
STK33  
STK36  
STK38  
STK38L  
STK39  
STK4

STMN1  
STN1  
STRAP  
STS  
STX11  
STX1B  
STX4  
STXBP2  
SUCNR1  
SUFU  
SUGCT  
SULT1A1  
SULT1A2  
SULT1A3  
SULT1A4  
SULT1C3  
SULT1C4  
SULT1E1  
SULT2A1  
SULT2B1  
SUMO1  
SUMO2  
SUMO4  
SUV39H1  
SV2A  
SV2C  
SYK  
SYP  
SYT1  
SYT2  
TAAR1  
TAAR6  
TAB2  
TAC1  
TAC3  
TACR1  
TACR2  
TACR3  
TACSTD2  
TAF1  
TAGLN  
TANC1

TANC2  
TAOK1  
TAOK3  
TAPBP  
TARDBP  
TAS2R16  
TAS2R31  
TASP1  
TAT  
TBC1D1  
TBC1D32  
TBK1  
TBL1XR1  
TBP  
TBX2  
TBX21  
TBXA2R  
TBXAS1  
TBXT  
TCF19  
TCF7L2  
TCIM  
TCN1  
TDGF1  
TDO2  
TDP1  
TDP2  
TEAD1  
TEC  
TEK  
TENT4A  
TEP1  
TERC  
TERT  
TESK1  
TESK2  
TET2  
TEX10  
TF  
TFAP2A  
TFF1  
TFF2

TFF3  
TFPI  
TFPI2  
TG  
TGFA  
TGFB1  
TGFB2  
TGFB3  
TGFB3  
TGFB3  
TGFB3  
TGM2  
TH  
THBD  
THBS1  
THBS2  
THBS4  
THOP1  
THPO  
THRA  
THRB  
THRSP  
THSD7B  
THY1  
TICAM1  
TIE1  
TIGIT  
TIRAP  
TJP1  
TK1  
TK2  
TLE3  
TLK2  
TLR2  
TLR3  
TLR4  
TLR5  
TLR6  
TLR7  
TLR8  
TLR9  
TMEM167A

TMEM97  
TMPRSS11D  
TMPRSS15  
TMPRSS2  
TMPRSS6  
TMSB10  
TMX2  
TNC  
TNF  
TNFAIP1  
TNFAIP3  
TNFRSF10A  
TNFRSF10B  
TNFRSF10C  
TNFRSF11A  
TNFRSF11B  
TNFRSF12A  
TNFRSF13B  
TNFRSF13C  
TNFRSF14  
TNFRSF17  
TNFRSF18  
TNFRSF1A  
TNFRSF1B  
TNFRSF25  
TNFRSF4  
TNFRSF8  
TNFRSF9  
TNFSF10  
TNFSF11  
TNFSF12  
TNFSF13  
TNFSF13B  
TNFSF14  
TNFSF4  
TNIK  
TNK1  
TNK2  
TNKS  
TNKS2  
TNNC1  
TNNC2

TNNI2  
TNNI3  
TNNT1  
TNNT2  
TNNT3  
TNRC6A  
TOB1  
TOLLIP  
TOP1  
TOP1MT  
TOP2A  
TOP2B  
TOR1A  
TP53  
TP53AIP1  
TP73  
TPBG  
TPCN1  
TPCN2  
TPH1  
TPH2  
TPK1  
TPM3  
TPMT  
TPO  
TPP1  
TPP2  
TPSAB1  
TPSB2  
TPSD1  
TPT1  
TRAF1  
TRAF3IP2  
TRAP1  
TRBC1  
TRBV20OR9-2  
TREML4  
TRGV3  
TRH  
TRHR  
TRIB2  
TRIB3

TRIM24  
TRIM5  
TRIT1  
TRPA1  
TRPC1  
TRPC3  
TRPC4  
TRPC5  
TRPC6  
TRPC7  
TRPM1  
TRPM2  
TRPM3  
TRPM4  
TRPM5  
TRPM6  
TRPM7  
TRPM8  
TRPV1  
TRPV2  
TRPV3  
TRPV4  
TRPV5  
TRPV6  
TSC1  
TSC2  
TSC22D3  
TSG101  
TSHB  
TSHR  
TSHZ2  
TSLP  
TSPAN5  
TSPO  
TSPYL1  
TSPYL2  
TSSK1B  
TSSK2  
TTC37  
TTK  
TTN  
TTR

TUB  
TUBA1A  
TUBA1B  
TUBA1C  
TUBA3C  
TUBA3D  
TUBA3E  
TUBA4A  
TUBB  
TUBB1  
TUBB2A  
TUBB2B  
TUBB3  
TUBB4A  
TUBB4B  
TUBB6  
TUBB8  
TUSC2  
TXK  
TXN  
TXN2  
TXNDC11  
TXNIP  
TXNRD1  
TXNRD2  
TXNRD3  
TYK2  
TYMP  
TYMS  
TYMSOS  
TYR  
TYRO3  
TYRP1  
U2AF1  
UBA1  
UBA2  
UBA3  
UBC  
UBE2D1  
UBE2I  
UBE2N  
UBE2T

UBR1  
UCHL1  
UCHL3  
UCHL5  
UCP1  
UCP2  
UCP3  
UGCG  
UGDH  
UGGT2  
UGT1A  
UGT1A1  
UGT1A10  
UGT1A3  
UGT1A4  
UGT1A5  
UGT1A6  
UGT1A7  
UGT1A8  
UGT1A9  
UGT2A1  
UGT2B10  
UGT2B15  
UGT2B17  
UGT2B4  
UGT2B7  
ULK1  
ULK3  
UMOD  
UMPS  
UNC119  
UNC13D  
UOX  
UQCR10  
UQCRB  
USP1  
USP14  
USP2  
USP5  
USP7  
USP9Y  
UST

UTRN  
UTS2R  
VAC14  
VAMP1  
VAMP2  
VASP  
VAV1  
VCAM1  
VCAN  
VCP  
VDAC1  
VDAC2  
VDAC3  
VDR  
VEGFA  
VEGFB  
VEGFC  
VHL  
VIM  
VIP  
VIPR1  
VIPR2  
VKORC1  
VKORC1L1  
VNN1  
VPS35  
VPS37A  
VSIR  
VWF  
WAS  
WDR5  
WEE1  
WIF1  
WNK1  
WNK2  
WNK3  
WNT5B  
WNT7A  
WRN  
WT1  
WWOX  
XBP1

XCR1  
XDH  
XIAP  
XIRP2  
XK  
XPA  
XPC  
XPNPEP1  
XPNPEP2  
XPNPEP3  
XPO1  
XRCC1  
XRCC3  
XRCC4  
XRCC5  
XYLT2  
YEATS4  
YES1  
YWHAE  
YWHAG  
YY1  
ZACN  
ZAP70  
ZBTB22  
ZDHHC7  
ZEB1  
ZFP36L2  
ZIC4  
ZMAT4  
ZNF100  
ZNF134  
ZNF165  
ZNF211  
ZNF385D  
ZNF423  
ZNF565  
ZNF568  
ZNF697  
ZNF804A  
ZNF816  
ZRSR2  
ZSCAN25

ZUP1  
SLC13A2  
CDKL5  
MGST1  
NISCH  
CLCA4  
VRK2  
DAPK2  
RIOK2  
GUCY1B3  
HAGH  
GSTO2  
TFRC  
FMO4  
STK17B  
SLC13A1  
ULK2  
ITGAE  
MAP3K4  
MGST2  
HSD17B14  
SLC7A8  
SLC22A17  
FMO2  
IL12RB1  
DHRS7  
DHRS2  
GSS  
PAK7  
RIOK3  
DHRS12  
LACTB  
MAN2B1  
MAP4K1  
MAST1  
PON3  
HSD17B1  
DHRS7B  
SOD3  
SLC22A18  
MAK  
ICK

PRPF4B  
CHST10  
ABCB6  
STK25  
GPX7  
TNNI3K  
FMO6P  
ALDH8A1  
CTGF  
ALDH6A1  
FKBP1B  
IFNA6  
IFNA8  
CIT  
EBPL  
SERPINA7  
CHST8  
HIST1H1A  
RIOK1  
PLGLB2  
STK35  
CCNT1  
SULT4A1  
LATS1  
ABCB7  
SLC6A6  
ALDH3B2  
DSTYK  
CCNA1  
GSTT2B  
GSTM5  
UGT2B28  
CHST5  
GLUL  
LAMC1  
CHST12  
PRPF4  
ALDH1B1  
SLCO5A1  
SULF1  
CLCA2  
GSTCD

MYLK3  
ABCC12  
CHST4  
PIP4K2B  
ALDH9A1  
MGST3  
PVRL4  
TAF1A  
SLC22A14  
MYLK4  
CYP39A1  
CCNB3  
CHST7  
ADHFE1  
CLCA3P  
CHST9  
SLC7A7  
DHRS4  
DHRS1  
CCNB2  
SLC13A3  
ALDH4A1  
DHRS3  
SLC22A15  
GPX4  
DHRS13  
CYP2S1  
HIST1H1E  
GSTM4  
DHRSX  
IL8  
KRT8  
GSTA4  
SLC22A13  
ADH6  
ADRBK1  
SULT1B1  
GSTA3  
UGT8  
CHST2  
CCNE2  
AURKAIP1

GPX2  
CYP8B1  
CHST13  
MAP3K15  
GSTA5  
CHST6  
RIPK4  
ALDH1A3  
HIST1H1B  
DHRS7C  
SLC22A10  
PRAME  
CYP4Z1  
CYP4F12  
CYP4F8  
CYP4F3  
IFNA10  
DHRS4L2  
HIST1H1C  
KIR2DL4  
H1F0  
MYT1  
IARS  
FGF16  
ABCB8  
GSTK1  
ADH5  
CYP2A7  
HSD17B11  
SULT1C2  
GPX6  
ABHD16A  
SLCO6A1  
GPX3  
TRBV7-1  
TRAV29DV5  
GSTM2  
UGT2B11  
IFNA7  
WEE2  
TRAC  
IFNA4

GSTA2  
C8orf44-SGK3  
FUCA2  
AOC1  
DBF4  
CDKL3  
CAMK1G  
CDK11A  
SLC6A13  
PPP5C  
ACPP  
UBA6  
UTS2  
BCAT1  
ABCA7  
KARS  
ME1  
GBA2  
MYO3B  
GLI2  
ATP12A  
NAALAD2  
PPIE  
CAD  
DNAJA1  
TGM1  
SNAP23  
MYO3A  
TAB1  
HAO1  
GPR50  
PARP4  
SFRP1  
SIGLEC6  
SIGLEC5  
PIIF  
WNT3  
MLX  
MANBA  
LDHB  
TARS  
NKTR

TTL  
IGFBP2  
KYNU  
ATP6V1B1  
SCP2  
AMPD2  
SRM  
HAO2  
GALE  
SLC5A9  
NEK9  
ELOVL3  
KHDRBS1  
CISD1  
ATF1  
ADCK4  
PCK1  
PEPD  
BMP4  
TGM3  
CAPNS1  
SIGLEC9  
SLC6A8  
AOC2  
G6PC  
HSD17B7  
PTPRA  
LARS  
AMPD3  
CCNH  
YARS  
SMPD2  
NMT1  
PLAA  
PPIL1  
MMP20  
MMP27  
PPM1B  
SORD  
IMPA2  
HUNK  
ADC

PKLR  
CALM2  
NCEH1  
SCD5  
FABP2  
PAM  
FARS2  
CASK  
CHRNA3  
PAOX  
TAOK2  
QDPR  
RANBP2  
NR4A2  
SLC5A10  
AZIN1  
PSMG3  
HLCS  
CALM3  
ADCK3  
BIRC8  
ALPPL2  
CPA3  
SNRK  
TKT  
GUCY1A3  
STK32C  
PNLIPRP2  
PIP4K2C  
TGM6  
MARS  
DPEP2  
ENGASE  
SOAT2  
CTRB1  
PPIC  
STK32A  
AGPAT2  
USP47  
GLB1  
ELOVL6  
CDC42BPG

RNASEH1  
PPIH  
LIPM  
FKBP2  
AMY1B  
PTPN2  
MAN1B1  
GSG2  
RPS27  
DHFRL1  
FUCA1  
CSNK1A1L  
UPP1  
PTP4A2  
SV2B  
PNLIPRP1  
AMY1C  
PLA2G2C  
SBK1  
GLRA4  
NEK5  
PPIAL4C  
FKBP1C  
GFPT1  
MGEA5  
TLK1  
SREBF2  
LIPN  
LIPK  
LIPJ  
HSPA1B  
AREGB  
DDX3X  
PGA4  
PPIAL4G  
AMY1A  
AMY2B  
PPIL3  
PLA2G4B  
PPIAL4B  
PPIAL4A  
PPIAL4D

BCL2L2-PABPN1  
WNT16  
CRLF1  
IL32  
TENM1  
SEMA3G  
MRC2  
CNTN1  
VSIG2  
NRXN3  
ERP44  
RNASET2  
GRN  
TIMP2  
AGA  
C6  
RTN4R  
USH2A  
ADAM28  
KITLG  
ADAMTS6  
LTBP1  
COL23A1  
FSTL4  
ITIH4  
ITIH1  
ATP2B4  
WNT8A  
WISP2  
NTN1  
COL17A1  
ATP2B3  
SCT  
FGF10  
WDR1  
PRLH  
LPHN1  
ACTN1  
PVR  
CD5L  
NTN4  
SEMA3A

FBLN1  
ITGA8  
LAMP3  
AFM  
SCGN  
CFHR2  
WNT11  
B4GALT1  
EPDR1  
ADAMTS2  
NID2  
EDEM2  
DEFB127  
CPXM1  
SIRPG  
OAS1  
CHGB  
ERP29  
CHRD  
FLT3LG  
DLD  
ITGA6  
APOH  
CCDC80  
COL9A3  
NXPE1  
TLL2  
CRTAC1  
NCR2  
MLN  
IGFALS  
MFNG  
PIK3IP1  
APOL1  
GZMH  
SERPINA4  
VRK1  
COL20A1  
ANGPT4  
SIRPB1  
CST9L  
WFDC2

SPINT3  
CHRD1  
FGF9  
PLA2G15  
METRN  
SCG3  
CPQ  
WISP1  
FGL1  
DKKL1  
RETN  
OLFM2  
ICAM4  
LILRB5  
WNT2  
FKBP14  
PCOLCE  
SFRP4  
AEBP1  
FKTN  
ABCA2  
C10orf54  
SPOCK2  
MINPP1  
EFTUD2  
EFNB3  
NMU  
CPE  
HGFAC  
SIAE  
NRXN2  
ST3GAL4  
APOA4  
FZD10  
IL26  
RAB35  
BTN3A3  
ULBP1  
TULP1  
GPLD1  
SMOC2  
LY86

C9  
HRG  
WNT5A  
FGF12  
HYAL1  
PLSCR4  
POMC  
EFEMP1  
WNT6  
IL1RL1  
IL18R1  
IL18RAP  
PLEK  
TNR  
PAPPA2  
CAPZA1  
CFHR3  
NID1  
ZP4  
CD48  
MFAP2  
CD160  
CD46  
RPN2  
CASQ2  
LTBP2  
INSL6  
INSL4  
TNN  
ENOX1  
NPPB  
SCPEP1  
PLBD1  
CRY2  
LY9  
SPINK4  
ITIH5  
TNFAIP6  
PLA2G12A  
C4BPA  
C4BPB  
SDC4

PIGT  
MATN4  
HIST1H4B  
BTN1A1  
HIST1H3B  
TREM1  
SSR1  
DEFB126  
CD93  
MMP24  
ST3GAL3  
WFIKKN1  
TNFRSF19  
ADM2  
IGLL1  
VGF  
TWSG1  
LOXL1  
CD68  
LBP  
PVRL2  
APOC1  
NCAN  
PXDN  
ANGPTL6  
ULBP2  
LILRB2  
NAPSA  
NDFIP1  
VIMP  
CHSY1  
MATN3  
EMILIN2  
MATN2  
FCRL2  
CHIT1  
PDZD2  
C1QTNF6  
SFTPD  
CD180  
CHL1  
PTGFRN

SAA2  
CRB1  
CFHR5  
ACP2  
GIF  
ADAMTS8  
LACRT  
ITGA7  
CD164  
KCNK1  
WNT10A  
ADAMTS7  
CHAD  
GH2  
IL36G  
IL36RN  
IL36B  
IL1F10  
NOV  
IGFBPL1  
TINAG  
FGFBP2  
ADAMTS14  
SEMA7A  
FGF5  
MMRN1  
CXCL9  
FBN2  
TAPBPL  
KERA  
DHH  
NPF  
CBLN3  
FBLN5  
SERPINA10  
ADAMTS17  
HAPLN3  
ADAMTS18  
CDH13  
KSR1  
CTRL  
GFOD2

IL19  
ADAMTS10  
MMEL1  
CELA2A  
CD53  
PROK1  
DPT  
FCRL5  
S100A7  
GDF7  
PDIA6  
TMEFF2  
SUMF1  
CNTN4  
ITGA9  
COL8A1  
BOC  
SLIT2  
CORIN  
SFRP2  
HAPLN1  
ADAMTS19  
LECT2  
PCYOX1L  
TNFRSF21  
IFNK  
GSN  
CRB2  
LCN9  
SAA4  
PTPRJ  
ESAM  
SIDT2  
PCDH15  
GPM6A  
CD226  
CRIM1  
LYZL2  
ADAMTS12  
CCDC3  
ITIH2  
BICD1

MEPE  
BMP3  
BMP6  
PLA2R1  
CD96  
KCNJ16  
JAM2  
DKK2  
ADAMTS3  
ADAMTSL3  
ITGAD  
ATP2B2  
LYZL4  
LRP8  
ST3GAL2  
KCNJ15  
ACAN  
HIST1H4H  
SLAMF8  
EDA  
FGF17  
MPZ  
WNT9B  
LAD1  
STC1  
GIP  
SCUBE1  
PSKH1  
CPAMD8  
NR2F6  
KALRN  
CILP2  
ADAMTS13  
LCN1  
MPZL3  
AMICA1  
FCRL3  
LY6K  
DMKN  
DCD  
CD300LG  
CXCL16

DRAXIN  
WNT4  
EXTL2  
CADM3  
IGSF8  
OLFML2B  
ACP6  
FRZB  
INHBB  
ANTXR2  
POGLUT1  
SSR2  
FBLN2  
FCRL1  
CD200R1  
ADAMTS9  
PCOLCE2  
CXCL3  
PPBP  
PF4  
RPN1  
LRPAP1  
PLXNB1  
HHIP  
EDIL3  
SCGB3A2  
SPINK1  
EGFLAM  
IL22RA2  
PI16  
DEFA6  
FREM1  
QSOX2  
SERPINA12  
NELL1  
ADAMTS15  
FBN1  
C2  
A2ML1  
GREM1  
KIR3DL1  
SPINT2

SERPINF2  
ANGPTL4  
LTBP3  
TNXB  
SFTPC  
NPNT  
FSTL5  
CTRB2  
THBS3  
EFNA1  
GP2  
ELSPBP1  
RNASE6  
MUC15  
GKN1  
NRG4  
BTD  
MUC3A  
SERPINA9  
TMED10  
CST2  
LILRA3  
PKHD1  
OBP2B  
NRTN  
RLN3  
MUC7  
SOSTDC1  
KSR2  
COL8A2  
SCG2  
CD8B  
NEGR1  
IL17D  
CTSW  
EFEMP2  
CCL19  
HPSE2  
ADAMTS20  
CST9  
PODN  
KLK15

SEZ6L2  
INHBC  
APOF  
SCUBE2  
PRIMA1  
CREG2  
CLEC14A  
C8G  
CD151  
CHID1  
ADAMTSL1  
BOLA1  
PRSS36  
CA8  
TAS1R2  
GPC5  
SYCN  
ITLN1  
RRH  
FKRP  
FCRL6  
PENK  
AATK  
EDDM3A  
TNFSF15  
RNASE10  
EPGN  
NTM  
VMO1  
GPC6  
OVCH2  
GKN2  
BMP8A  
NOG  
IFNL2  
FAM3B  
NPW  
CRELD2  
SLIT3  
EFNA5  
COLEC10  
BPIFC

FAM19A3  
LRRC26  
RNLS  
TMED9  
TNFAIP2  
TCN2  
IFITM1  
CD300LF  
PRG2  
HYAL3  
LILRA5  
LYPD6  
BCAM  
HAPLN4  
THSD4  
WNT7B  
SCGB1C1  
AGRN  
BSPH1  
ZP3  
KRTDAP  
COL25A1  
RNASE9  
RHCE  
QRFP  
OSTN  
FZD9  
OPTC  
PRELP  
UTS2B  
HIST1H4D  
SBSN  
RELN  
VSTM1  
NCR1  
IL1RAP  
SPOCK3  
HIST1H4A  
SFTA2  
FAM3C  
HIST1H3E  
HIST1H4C

HIST1H3D  
COL13A1  
ENTPD6  
ENPP1  
CR1L  
SCGB1D4  
PSAP  
SIRPA  
HIST1H4F  
HIST1H4I  
HIST1H3A  
HIST1H4E  
SMOC1  
CAPZA2  
NEU1  
CSHL1  
C6orf25  
APOM  
NCR3  
PCDHA2  
TMSB4X  
KLRC2  
C1QTNF9B  
IGLV4-60  
IGLV11-55  
IGHG3  
DARC  
CSH2  
CEACAM16  
DNASE1  
CCL27  
CELA2B  
RPTN  
IFI30  
FAM19A5  
C1QTNF5  
APOC4-APOC2  
ORM1  
APOC2  
HLA-DQA2  
DEFA3  
DEFA1B

HLA-DOB  
EGFL8  
TNFRSF6B  
CFHR1  
LILRA6  
FCGR2C  
C4A  
INSL3  
OC90  
SEMA3F  
CD99  
HS3ST1  
KLHL13  
PRSS22  
LAMP2  
ALDH3B1  
CCL26  
CELSR3  
PGLYRP1  
ST3GAL1  
KAL1  
IL20RA  
SERPINB1  
C8B  
MYOC  
VCL  
TUBG2  
TLL1  
TRIO  
COL9A2  
H6PD  
LY75  
OPN3  
PTPRN  
CBLN4  
CHRD2  
RELT  
IL17RB  
STYK1  
SLC6A16  
CA11  
GPC1

ATP2C2  
CHI3L2  
YBX1  
MAST4  
FSTL3  
CNGB1  
VASH1  
LMCD1  
SPP2  
SPEG  
CYP2W1  
SLC24A1  
LMAN1  
C19orf10  
TUBE1  
CELSR1  
WNT8B  
KLHL20  
GPC4  
ACTN2  
FKBP6  
CST7  
TULP3  
FGF20  
PKD2L2  
BPIFB2  
CLUL1  
FKBP7  
MOK  
IMPG2  
COL19A1  
P2RX5  
EPYC  
FAT1  
COL16A1  
FCN1  
OVGP1  
MAST2  
TMPRSS11E  
ATRN  
SIGLEC1  
HEPH

LTBP4  
LYZ  
DNAJB11  
GNPTG  
CD209  
EFNB1  
FCGBP  
CECR1  
BAMBI  
CRISP3  
TMED1  
KCNK6  
AMELY  
KLHL22  
SNAP29  
P2RX6  
GGT5  
PPIL2  
ADRBK2  
GGTLC2  
TIMP3  
UPK3A  
CHADL  
FKBP3  
COCH  
CHGA  
AVP  
RSPO4  
ASIP  
GUCY2F  
RS1  
PCSK1N  
TIMP1  
KLHL4  
ITIH6  
SRPX2  
OLFM4  
CBLN1  
PRSS54  
ZP2  
PRSS33  
XYLT1

PDGFRL  
FZD3  
DKK4  
TULP2  
CGB2  
LHB  
CGB  
CLEC4M  
IL4I1  
LILRB1  
LILRA1  
EBI3  
APLP1  
SIGLEC8  
CD79A  
CLEC11A  
COMP  
FKBP8  
PTN  
NPVF  
STX1A  
CCL24  
SPAM1  
AGR2  
CNTNAP3  
OGN  
ASPN  
ECM2  
AMBP  
TNFSF8  
RLN1  
GDF10  
KAZALD1  
FGF8  
SMC3  
LGI1  
TUBD1  
LGALS3BP  
FAM20A  
ODAM  
SMR3A  
PF4V1

KLHL2  
CPZ  
KLHL5  
TECTA  
CRTAM  
HPX  
PVRL1  
CD81  
PRR4  
ART4  
MGP  
ENDOU  
ACRBP  
KLRB1  
COL12A1  
COL9A1  
IMPG1  
WISP3  
ENPP5  
MEP1A  
ERBB2IP  
C7  
GZMK  
IK  
BTNL8  
PPWD1  
SERPINI2  
COL7A1  
CSPG5  
KLHL18  
KLHL24  
SLC4A3  
ADAM23  
NRBP1  
LOXL3  
GNLY  
PCYOX1  
CD207  
ANGPTL1  
QSOX1  
IVNS1ABP  
PRG4

OLFML3  
BMP8B  
CTBS  
KLHL12  
LEPRE1  
ARTN  
NENF  
TXNDC12  
MUC5B  
VAMP8  
OLFM3  
C2orf40  
FKBP15  
KDSR  
KLHL29  
TECTB  
PCDHB10  
GPR31  
MASTL  
LYZL1  
MRC1  
HSPH1  
KBTBD7  
TGFB1  
EPX  
TEX14  
A1BG  
CPXM2  
OBP2A  
FMOD  
COPA  
OPN4  
KLHL7  
FKBP9  
CD97  
MMP19  
COL10A1  
PLP1  
NRK  
SEMG2  
SEMG1  
KCNK15

VAMP7  
CEACAM8  
NDP  
CRISP2  
SERPINB6  
COL21A1  
CRISP1  
OPN5  
CXCL6  
SCGB1D2  
SCGB2A1  
WNT1  
AMELX  
PSPN  
ATG4C  
GNRH2  
CST8  
GFRA4  
OTOR  
BPIFB1  
SLURP1  
GPR42  
KIRREL2  
FLRT1  
CSN1S1  
STATH  
HTN1  
WNK4  
CFP  
OMG  
OMD  
EDN2  
MASP1  
EMR2  
FGL2  
SPINK2  
CPA4  
LRRC4  
LRRC17  
OPN1SW  
TTBK2  
MMP28

KLK10  
ART1  
PRKCSH  
GDF1  
BST2  
BMP15  
ACTN4  
HRC  
SMPDL3B  
PNCK  
HABP4  
PPIL4  
BPIFA2  
GGT7  
DEFB118  
C1QL1  
TEX101  
EMR3  
LRRC4B  
TUBG1  
PODNL1  
NUP210  
FCRLA  
CNGA4  
ENAM  
IGJ  
ITGB4  
H3F3B  
CLEC10A  
SDF2  
BCAN  
HAPLN2  
RTN3  
GGT2  
SPINK5  
TMEM66  
ADAMDEC1  
IRAK2  
REG4  
WNT2B  
CD101  
FKBP11

ERN2  
C12orf39  
PRH2  
CSN2  
HILPDA  
GDF11  
TAAR5  
PRADC1  
GNS  
KLHL36  
SERPINE2  
GPR45  
ALDH1L2  
SCYL2  
PLXNC1  
SLC41A2  
LECT1  
THSD1  
ITM2B  
CFC1  
UGGT1  
GYPC  
OR1J1  
ANGPTL2  
DERL1  
TLN1  
IFNA21  
CD72  
BPHL  
CLPS  
FGFBP1  
IL18BP  
PI15  
CGREF1  
EMILIN1  
ATRAID  
PLA2G12B  
CILP  
C1RL  
LRIG3  
SLC39A5  
TSSK4

GPR65  
MFAP1  
EFTUD1  
DPEP3  
OR4D1  
SPACA3  
ARSG  
GALNT1  
MEP1B  
SECTM1  
FKBP10  
SAMD1  
LMTK3  
CACNG8  
FBN3  
SIGLEC10  
PTH2  
FCN3  
CYR61  
PIGK  
TINAGL1  
ITGA10  
GPR161  
CREG1  
XCL1  
XCL2  
HMCN1  
TUFT1  
ECM1  
ADAMTSL4  
LEFTY2  
WNT9A  
REG3G  
THNSL2  
C1QL2  
FBLN7  
LYG1  
ABCA12  
ACKR2  
IGSF11  
UCN2  
MANF

MUC4  
AHSG  
KLHL8  
CYP4V2  
ADAMTS16  
CXCL14  
KLHL3  
SCUBE3  
TTBK1  
GPR6  
TAAR2  
TAAR8  
SLC12A9  
NLGN4X  
RBMX  
OPN1MW  
NSDHL  
PXDNL  
PSKH2  
RSPO2  
CER1  
PLIN2  
IFNA16  
LCN2  
RGR  
HABP2  
LRRC4C  
PAMR1  
KLHL35  
GGTLC1  
ZP1  
TMEM25  
SOGA1  
SPINT4  
GPHA2  
ALDOA  
KLHL1  
CNDP1  
PLBD2  
DST  
UHMK1  
SPOCK1

TMEM123  
SPARCL1  
DSPP  
DMP1  
C16orf89  
SEMA3D  
ABI3BP  
LRRK1  
WNT3A  
OBSCN  
GPR26  
CXADR  
CYP2U1  
GPR78  
VSIG4  
OTOA  
GPR61  
TSPAN7  
GDF6  
CD109  
BUB1B  
KLHL40  
C8A  
TIMP4  
IL34  
SVOPL  
GPR153  
CD1C  
CD1B  
CD1E  
CPA5  
NBL1  
F11R  
PINK1  
C1QC  
CES5A  
PGLYRP3  
SPON2  
LYPD5  
FNDC5  
TOR2A  
NEK8

AZGP1  
PGLYRP2  
SCGB3A1  
LYZL6  
CCL16  
CCL15-CCL14  
KLHL10  
HCRT  
ALDH16A1  
SIGLEC11  
EMC10  
OR7G1  
NTN3  
CYP4A22  
KLHL21  
MATN1  
TSSK3  
TM2D1  
BPNT1  
PIGR  
FCAMR  
H3F3A  
BOLA3  
KBTBD8  
FAM19A4  
APOA1BP  
PROK2  
FSTL1  
IGFBP7  
NEK10  
RETNLB  
FCRL4  
SERPINI1  
PTX3  
IL17RE  
PRRT3  
CXCL1  
PLSCR2  
RYK  
UCN  
CDCP1  
CLEC3B

SLC6A20  
LIPH  
MFI2  
OTOP1  
AIMP1  
CAMKV  
ETNPPL  
PRSS12  
HMGB2  
SCRG1  
AGGF1  
ESM1  
ENPP6  
GFM2  
SLC6A18  
GDF9  
LEAP2  
GPR85  
BMPER  
LMTK2  
HNF4G  
DEFB1  
GPR146  
SPAG11B  
CTHRC1  
MAMDC2  
FIGF  
NLGN4Y  
FAT3  
GPR101  
KBTBD6  
UCMA  
ENOX2  
RNASE7  
VWA2  
PRAP1  
GPR176  
JAM3  
SVOP  
OPN1MW2  
OR10A5  
SERPINB7

SERPINB8  
MFAP4  
CLEC3A  
SERPINB12  
CHRFAM7A  
GPR182  
PDIA3  
BPIFB6  
ISLR2  
CCL23  
OR51E2  
KLHL26  
LALBA  
LAIR1  
LAIR2  
LY6D  
TMIGD2  
SEMA6B  
CYB5D2  
GGT6  
KLK11  
KLK13  
CD320  
CD300C  
CD300A  
ABCA3  
ULK4  
VASN  
KCNG4  
KLHL30  
SCGB1D1  
GFM1  
OR13J1  
ENHO  
JMJD7-PLA2G4B  
SIGLEC7  
PARM1  
CXCL11  
IL1RAPL1  
RNASE2  
RNASE3  
OR4K15

HTRA4  
VPREB1  
GP9  
NLGN1  
MUC17  
WNT10B  
TM4SF1  
TAS1R3  
NLGN2  
GPR25  
CRTAP  
CNGB3  
CST1  
SEMA3E  
SERPINB9  
HTRA3  
GPR27  
KBTBD2  
CYTL1  
OR7G2  
OR1M1  
OR8B12  
PLAC1  
PROL1  
SMR3B  
NETO2  
CSN3  
LRG1  
CLCN5  
SPACA5B  
SPACA5  
OR1L8  
CLSTN1  
ENC1  
GPR82  
DEFB4A  
ANGPTL7  
CYP4F22  
REG1B  
OR1A1  
GPR22  
AZU1

PRSS27  
INSL5  
MUCL1  
KLHL6  
SMPDL3A  
MOS  
OR4D9  
CES4A  
CES3  
MRGPRF  
LRRN3  
GPR151  
MMRN2  
GPR148  
KCNK7  
C1QB  
NDNF  
GLIPR1L1  
DAG1  
RNASE8  
AGR3  
PEAK1  
TNFRSF10D  
TAS1R1  
MUC13  
WFIKKN2  
CNP  
GPR160  
KLHL15  
TLR10  
TLR1  
LINGO2  
IL20RB  
FGFBP3  
GPR171  
GPR149  
CD164L2  
ZG16  
PDIK1L  
CST6  
TMEM9B  
OR10P1

DPP10  
CLCF1  
GPR152  
NR2F1  
TSPEAR  
LRRN1  
KLHL38  
OR4K17  
OR4K5  
TAC4  
KBTBD11  
OR4F17  
DEFB104A  
DEFB103A  
FIBIN  
DEFB104B  
DEAF1  
DEFB103B  
OR2B11  
CD163L1  
DEFB114  
OR4F4  
FAM20C  
PVRL3  
GPR150  
TSSK6  
SPINK6  
VN1R1  
SPAG11A  
TUBAL3  
UCN3  
AMBN  
GP5  
CPN2  
CD300LB  
LGALS7B  
ALOXE3  
DAND5  
VWA1  
FJX1  
KLHL28  
ALOX12B

SLITRK4  
MRGPRX4  
MRGPRX3  
ABCA13  
OR10K2  
SHISA2  
OR51E1  
DEFB112  
GPR62  
HEPHL1  
CCL13  
FDCSP  
GPR135  
OR8H3  
OR5AS1  
OR4C16  
OR4A16  
ENPP7  
MRGPRG  
HIST2H4B  
ATP6AP2  
OTOL1  
BGN  
HIST1H3I  
NXP3  
OR2V2  
RESP18  
IGIP  
GRID1  
OR2T29  
GPIHBP1  
GPR97  
GGTLC3  
FREM3  
PLGLB1  
OR2T34  
UTP11L  
HIST2H3D  
DGCR6  
KLHL25  
FAM19A1  
GPR1

TUBA8  
EMILIN3  
OLFML1  
ARSI  
LRRC55  
SDR42E2  
HIST2H4A  
NPB  
OR2T10  
CNTN2  
LRTOMT  
OR1D2  
GPR173  
DEFB108B  
GDF3  
MRGPRE  
C1QTNF8  
NELL2  
APOO  
SDR42E1  
MUC6  
SEMA4B  
FLRT2  
C6orf120  
PPIL6  
CDNF  
NOTUM  
KLHL33  
SFTPA2  
OLFML2A  
LYG2  
IFIT1  
EVI2B  
RTN4RL1  
OR4F5  
BPIFB3  
BPIFB4  
KLHL32  
BTLA  
CYP4X1  
CD300E  
BTN3A2

KLK12  
DEFB105A  
DEFB107A  
DEFB106A  
DEFB105B  
LILRB4  
SERPINA11  
EMID1  
GPR141  
DEFB106B  
SBK2  
AMTN  
KBTBD12  
TMEM256-PLSCR3  
DMBT1  
OVCH1  
COL14A1  
KLHL17  
C17orf99  
OTOG  
IGFL1  
PLSCR1  
GPR21  
LCTL  
IGFL3  
VWC2  
NYX  
LPI  
IL1RAPL2  
S100A13  
CXCL17  
VN1R2  
FAT4  
STK40  
CGB7  
NLGN3  
OR2T3  
SLC22A25  
CLPSL2  
POTEI  
PATE2  
SLC6A17

ADAM32  
HIST1H3J  
OR1J2  
HIST1H4J  
CCL4L2  
DIO3  
IPP  
GYPE  
SPN  
GZMM  
MFAP5  
SERPINB13  
SLC22A24  
OR51C1P  
NMB  
OR52M1  
HIST4H4  
PRB3  
HIST1H4K  
ERO1L  
AADACL2  
KEL  
DEFB107B  
BPIFA1  
RPS6KL1  
HIST1H4L  
KLHL9  
LRRTM3  
EGFL6  
C9orf96  
NAGA  
GP1BB  
OR2T5  
RAET1G  
HIST2H3C  
HIST1H3H  
PNLIPRP3  
HIST2H3A  
DEFB110  
LCN8  
LRIT2  
SYT15

CD300LD  
NMS  
OR2H2  
MAS1L  
OR2H1  
OR11A1  
OR14J1  
GPR20  
SPINK9  
C11orf83  
CD177  
CCL4L1  
CCL3L1  
LGALS7  
CDKL4  
VIT  
GPR56  
HTN3  
SERPINB11  
SERPINB4  
SERPINB5  
RNASE13  
COLQ  
IGKC  
IGKV4-1  
IGKV5-2  
IGKV2-40  
IGKV1D-42  
IGLV4-69  
IGLV8-61  
IGLV10-54  
IGLV1-51  
IGLV7-46  
IGLV5-45  
IGLV1-44  
IGLV7-43  
IGLV1-40  
IGLV5-37  
IGLV1-36  
IGLV3-27  
IGLV3-25  
IGLV2-23

IGLV3-22  
IGLV2-18  
IGLV3-16  
IGLV3-12  
IGLV2-11  
IGLV4-3  
IGLC2  
IGLC3  
IGLC7  
TRAV8-4  
IGHA2  
IGHG4  
IGHG2  
IGHD  
IGHM  
IGHV1-2  
IGHV3-23  
IGHV1-46  
IGHV7-81  
KLK9  
NUP62  
CGB8  
KLHL23  
NOTCH2NL  
GPC2  
GANC  
ANG  
NPS  
DEFB113  
GPR33  
MSMP  
DEFB116  
DEFB115  
CKLF  
OR1C1  
IGKV3D-15  
C17orf72  
C4B  
IFNA14  
PRB4  
CYP21A2  
PRH1

PSG1  
MTRNR2L4  
IFNA17  
TAAR9  
PATE4  
IGKV3-20  
LILRA2  
C1QTNF9  
IGKV1D-16  
IGKV3-11  
CD302  
PSG2  
IGKV1-39  
SERPINB10  
IGKV3-7  
IGKV2-30  
IGKV2D-29  
EFNA4  
IGKV1-5  
LEFTY1  
DDOST  
IGKV3-15  
MTRNR2L5  
GYPB  
GPR162  
SEPP1  
IGKV2D-40  
IGKV1D-39  
SERPINE3  
SIGLEC12  
IGLL5  
OR52B2  
MTRNR2L8  
MTRNR2L10  
MTRNR2L3  
ASIC5  
CCL3L3  
MTRNR2L1  
MTRNR2L7  
RNASE4  
SLC22A31  
GAN

---

**Table S4. eQTL MR results for LBP**

| <b>gene id</b>  | <b>gene name</b> | <b>method</b>             | <b>nSNP</b> | <b><math>\beta</math></b> | <b>se</b> | <b>pval</b> |          |
|-----------------|------------------|---------------------------|-------------|---------------------------|-----------|-------------|----------|
| ENSG00000131475 | VPS25            | Inverse variance weighted | 88          | -0.23751435               |           | 0.028635417 | 1.09E-16 |
| ENSG00000169599 | NFU1             | Inverse variance weighted | 10          | 0.142261244               |           | 0.020189051 | 1.84E-12 |
| ENSG00000091106 | NLRC4            | Inverse variance weighted | 16          | -0.17188169               |           | 0.025359382 | 1.22E-11 |
| ENSG00000133103 | COG6             | Inverse variance weighted | 26          | -0.0711998                |           | 0.011990699 | 2.89E-09 |
| ENSG00000065060 | BLTP3A           | Inverse variance weighted | 25          | 0.044130588               |           | 0.007842371 | 1.83E-08 |
| ENSG00000157322 | CLEC18A          | Inverse variance weighted | 22          | -0.02812304               |           | 0.005097622 | 3.45E-08 |
| ENSG00000103111 | MON1B            | Inverse variance weighted | 28          | 0.071878532               |           | 0.013216478 | 5.37E-08 |
| ENSG00000072778 | ACADVL           | Inverse variance weighted | 24          | -0.08962989               |           | 0.01704506  | 1.45E-07 |
| ENSG00000138074 | SLC5A6           | Inverse variance weighted | 17          | 0.096773132               |           | 0.01859455  | 1.95E-07 |
| ENSG00000127951 | FGL2             | Inverse variance weighted | 10          | -0.15089872               |           | 0.029275654 | 2.54E-07 |
| ENSG00000106089 | STX1A            | Inverse variance weighted | 7           | 0.168474148               |           | 0.033081154 | 3.53E-07 |
| ENSG00000229515 | FLT1P1           | Inverse variance weighted | 16          | -0.05029532               |           | 0.009944467 | 4.25E-07 |
| ENSG00000182196 | ARL6IP4          | Inverse variance weighted | 10          | 0.19295777                |           | 0.038278022 | 4.63E-07 |
| ENSG00000188428 | BLOC1S5          | Inverse variance weighted | 14          | -0.13113157               |           | 0.026263603 | 5.95E-07 |
| ENSG00000204498 | NFKBIL1          | Inverse variance weighted | 3           | 0.211857643               |           | 0.042789267 | 7.38E-07 |
| ENSG00000171634 | BPTF             | Inverse variance weighted | 2           | 0.488966309               |           | 0.099034024 | 7.92E-07 |
| ENSG00000125388 | GRK4             | Inverse variance weighted | 15          | 0.089451784               |           | 0.018513868 | 1.35E-06 |
| ENSG00000114316 | USP4             | Inverse variance weighted | 2           | 0.508541365               |           | 0.106567292 | 1.82E-06 |
| ENSG00000142089 | IFITM3           | Inverse variance weighted | 53          | 0.050329598               |           | 0.010556729 | 1.86E-06 |
| ENSG00000181631 | P2RY13           | Inverse variance weighted | 14          | 0.082592348               |           | 0.017358693 | 1.96E-06 |
| ENSG00000182179 | UBA7             | Inverse variance weighted | 16          | -0.06768191               |           | 0.014232337 | 1.98E-06 |

|                 |       |                           |    |             |             |          |
|-----------------|-------|---------------------------|----|-------------|-------------|----------|
| ENSG00000184277 | TM2D3 | Inverse variance weighted | 12 | -0.13364386 | 0.028223195 | 2.19E-06 |
| ENSG00000145022 | TCTA  | Inverse variance weighted | 2  | -0.48832747 | 0.103473725 | 2.37E-06 |
| ENSG00000109323 | MANBA | Inverse variance weighted | 10 | -0.13180177 | 0.02802651  | 2.57E-06 |
| ENSG00000145354 | CISD2 | Inverse variance weighted | 8  | 0.163263826 | 0.034723865 | 2.58E-06 |
| ENSG00000141452 | RMC1  | Inverse variance weighted | 14 | -0.10141947 | 0.021582871 | 2.61E-06 |

**Table S5.** eQTL MR results for IVDD

| gene id         | gene name | method                    | nSNP | $\beta$     | se          | pval     |
|-----------------|-----------|---------------------------|------|-------------|-------------|----------|
| ENSG00000151632 | AKR1C2    | Inverse variance weighted | 33   | -0.06255827 | 0.009045987 | 4.66E-12 |
| ENSG00000214548 | MEG3      | Inverse variance weighted | 20   | -0.08700363 | 0.013452578 | 9.97E-11 |
| ENSG00000091106 | NLRC4     | Inverse variance weighted | 16   | -0.14322182 | 0.023029704 | 5.00E-10 |
| ENSG00000196821 | ILRUN     | Inverse variance weighted | 11   | 0.125259154 | 0.020175724 | 5.35E-10 |
| ENSG00000171466 | ZNF562    | Inverse variance weighted | 3    | 0.463469964 | 0.078599182 | 3.71E-09 |
| ENSG00000131475 | VPS25     | Inverse variance weighted | 89   | 0.149789122 | 0.025541577 | 4.50E-09 |
| ENSG00000204314 | PRRT1     | Inverse variance weighted | 4    | 0.374813612 | 0.064054328 | 4.87E-09 |
| ENSG00000112759 | SLC29A1   | Inverse variance weighted | 12   | 0.194479031 | 0.033514394 | 6.52E-09 |
| ENSG00000123297 | TSFM      | Inverse variance weighted | 14   | 0.133519665 | 0.023294412 | 9.94E-09 |
| ENSG00000198380 | GFPT1     | Inverse variance weighted | 19   | 0.085306491 | 0.014898849 | 1.03E-08 |
| ENSG00000185559 | DLK1      | Inverse variance weighted | 9    | -0.22902539 | 0.040222012 | 1.24E-08 |
| ENSG00000170876 | TMEM43    | Inverse variance weighted | 9    | 0.170553701 | 0.03007794  | 1.42E-08 |
| ENSG00000106089 | STX1A     | Inverse variance weighted | 7    | 0.169460128 | 0.030032911 | 1.68E-08 |
| ENSG00000137270 | GCM1      | Inverse variance weighted | 12   | -0.1502436  | 0.02687454  | 2.26E-08 |
| ENSG00000132323 | ILKAP     | Inverse variance weighted | 8    | 0.236272102 | 0.042402426 | 2.52E-08 |
| ENSG00000123427 | EEF1AKMT3 | Inverse variance weighted | 24   | -0.03426086 | 0.006199064 | 3.26E-08 |

|                 |          |                           |    |             |             |          |
|-----------------|----------|---------------------------|----|-------------|-------------|----------|
| ENSG00000124380 | SNRNP27  | Inverse variance weighted | 17 | 0.089690528 | 0.016284726 | 3.64E-08 |
| ENSG00000138030 | KHK      | Inverse variance weighted | 26 | -0.06798306 | 0.012385762 | 4.05E-08 |
| ENSG00000182196 | ARL6IP4  | Inverse variance weighted | 10 | 0.193377595 | 0.035872492 | 7.02E-08 |
| ENSG00000135407 | AVIL     | Inverse variance weighted | 10 | -0.08403147 | 0.015665459 | 8.13E-08 |
| ENSG00000137404 | NRM      | Wald ratio                | 1  | 0.684296354 | 0.128262908 | 9.55E-08 |
| ENSG00000166260 | COX11    | Inverse variance weighted | 20 | 0.08866205  | 0.016648524 | 1.01E-07 |
| ENSG00000157593 | SLC35B2  | Inverse variance weighted | 11 | 0.142901476 | 0.026892802 | 1.07E-07 |
| ENSG00000141295 | SCRN2    | Inverse variance weighted | 19 | -0.05356447 | 0.010214311 | 1.57E-07 |
| ENSG00000135452 | TSPAN31  | Inverse variance weighted | 11 | 0.099605973 | 0.019000084 | 1.59E-07 |
| ENSG00000141934 | PLPP2    | Inverse variance weighted | 16 | -0.10941684 | 0.020929245 | 1.71E-07 |
| ENSG00000141469 | SLC14A1  | Inverse variance weighted | 19 | -0.0990789  | 0.019260428 | 2.69E-07 |
| ENSG00000197136 | PCNX3    | Inverse variance weighted | 7  | 0.221971325 | 0.043180754 | 2.74E-07 |
| ENSG00000010072 | SPRTN    | Inverse variance weighted | 9  | 0.184002075 | 0.03582908  | 2.81E-07 |
| ENSG00000233429 | HOTAIRM1 | Inverse variance weighted | 23 | -0.02664984 | 0.005193828 | 2.88E-07 |
| ENSG00000169599 | NFU1     | Inverse variance weighted | 9  | 0.136904658 | 0.026876428 | 3.51E-07 |
| ENSG00000142330 | CAPN10   | Inverse variance weighted | 9  | 0.198929424 | 0.039161378 | 3.78E-07 |
| ENSG00000084764 | MAPRE3   | Inverse variance weighted | 6  | -0.19888919 | 0.039455434 | 4.63E-07 |
| ENSG00000105996 | HOXA2    | Inverse variance weighted | 19 | -0.09946895 | 0.019940603 | 6.09E-07 |
| ENSG00000101181 | MTG2     | Inverse variance weighted | 8  | -0.17380122 | 0.034949244 | 6.59E-07 |
| ENSG00000245685 | FRG1-DT  | Inverse variance weighted | 10 | 0.057061933 | 0.011500145 | 6.98E-07 |
| ENSG00000111012 | CYP27B1  | Wald ratio                | 1  | -1.02382967 | 0.208649348 | 9.25E-07 |
| ENSG00000144580 | CNOT9    | Inverse variance weighted | 15 | -0.03915916 | 0.008009795 | 1.01E-06 |
| ENSG00000204186 | ZDBF2    | Wald ratio                | 1  | 0.688672053 | 0.141009492 | 1.04E-06 |
| ENSG00000137877 | SPTBN5   | Inverse variance weighted | 19 | 0.095050799 | 0.019763793 | 1.51E-06 |

|                 |          |                           |    |             |             |          |
|-----------------|----------|---------------------------|----|-------------|-------------|----------|
| ENSG00000127452 | FBXL12   | Inverse variance weighted | 2  | -0.31060985 | 0.064623052 | 1.54E-06 |
| ENSG00000147454 | SLC25A37 | Inverse variance weighted | 27 | -0.05498389 | 0.01144236  | 1.55E-06 |
| ENSG00000135913 | USP37    | Inverse variance weighted | 3  | 0.225657692 | 0.047281231 | 1.82E-06 |
| ENSG00000138028 | CGREF1   | Inverse variance weighted | 3  | -0.41372533 | 0.086971196 | 1.96E-06 |
| ENSG00000106052 | TAX1BP1  | Inverse variance weighted | 6  | -0.29952431 | 0.06380576  | 2.68E-06 |

**Table S6.** eQTL MR results for sciatica

| gene id         | gene name | method                    | nSNP | $\beta$     | se          | pval     |
|-----------------|-----------|---------------------------|------|-------------|-------------|----------|
| ENSG00000169599 | NFU1      | Inverse variance weighted | 10   | 0.156857168 | 0.023454635 | 2.27E-11 |
| ENSG00000182196 | ARL6IP4   | Inverse variance weighted | 10   | 0.26609593  | 0.040337838 | 4.20E-11 |
| ENSG00000168092 | PAFAH1B2  | Inverse variance weighted | 16   | 0.100984132 | 0.016042191 | 3.08E-10 |
| ENSG00000102879 | CORO1A    | Inverse variance weighted | 7    | -0.36577477 | 0.060402952 | 1.40E-09 |
| ENSG00000125458 | NT5C      | Inverse variance weighted | 17   | 0.141508989 | 0.023992422 | 3.68E-09 |
| ENSG00000165156 | ZHX1      | Inverse variance weighted | 8    | 0.537947657 | 0.091752924 | 4.55E-09 |
| ENSG00000142089 | IFITM3    | Inverse variance weighted | 53   | 0.057950546 | 0.00998052  | 6.38E-09 |
| ENSG00000106089 | STX1A     | Inverse variance weighted | 7    | 0.215610059 | 0.038493226 | 2.13E-08 |
| ENSG00000153162 | BMP6      | Inverse variance weighted | 13   | 0.202979278 | 0.037629228 | 6.88E-08 |
| ENSG00000188612 | SUMO2     | Inverse variance weighted | 6    | -0.21591608 | 0.040171879 | 7.67E-08 |
| ENSG00000151498 | ACAD8     | Inverse variance weighted | 24   | 0.092486361 | 0.017552241 | 1.37E-07 |
| ENSG00000102886 | GDPD3     | Inverse variance weighted | 7    | -0.23561741 | 0.045005159 | 1.65E-07 |
| ENSG00000214548 | MEG3      | Inverse variance weighted | 20   | -0.08707474 | 0.016712778 | 1.89E-07 |
| ENSG00000233276 | GPX1      | Inverse variance weighted | 2    | 0.427839869 | 0.082254232 | 1.98E-07 |
| ENSG00000111325 | OGFOD2    | Wald ratio                | 1    | -0.91655973 | 0.181116298 | 4.18E-07 |
| ENSG00000188428 | BLOC1S5   | Inverse variance weighted | 14   | -0.17489755 | 0.034880264 | 5.32E-07 |
| ENSG00000204314 | PRRT1     | Inverse variance weighted | 4    | 0.406244852 | 0.082114363 | 7.52E-07 |

|                 |          |                           |    |             |             |          |
|-----------------|----------|---------------------------|----|-------------|-------------|----------|
| ENSG00000125449 | ARMC7    | Inverse variance weighted | 13 | -0.15652144 | 0.032240992 | 1.21E-06 |
| ENSG00000155363 | MOV10    | Inverse variance weighted | 11 | -0.162437   | 0.033540501 | 1.28E-06 |
| ENSG00000137404 | NRM      | Wald ratio                | 1  | 0.788761422 | 0.164228437 | 1.56E-06 |
| ENSG00000134815 | DHX34    | Inverse variance weighted | 22 | 0.089685696 | 0.018717247 | 1.65E-06 |
| ENSG00000165487 | MICU2    | Inverse variance weighted | 12 | 0.120856031 | 0.025507387 | 2.16E-06 |
| ENSG00000163807 | KIAA1143 | Inverse variance weighted | 15 | 0.112122843 | 0.023716661 | 2.27E-06 |
| ENSG00000134248 | LAMTOR5  | Inverse variance weighted | 15 | -0.14545918 | 0.030836665 | 2.39E-06 |
| ENSG00000239857 | GET4     | Inverse variance weighted | 23 | 0.120945926 | 0.025776326 | 2.70E-06 |
| ENSG00000075340 | ADD2     | Inverse variance weighted | 14 | 0.198214949 | 0.042373182 | 2.90E-06 |

**Table S7.** pQTL MR results for LBP

| gene id         | gene name | method             | nSNP | $\beta$     | se          | pval        |
|-----------------|-----------|--------------------|------|-------------|-------------|-------------|
| ENSG00000124557 | BTN1A1    | Inverse variance w | 2    | -0.16918316 | 0.032712376 | 2.31801E-07 |
| ENSG00000130203 | APOE      | Inverse variance w | 10   | 0.08616483  | 0.019859587 | 1.43327E-05 |

**Table S8.** pQTL MR results for IVDD

| gene id         | gene name | method                    | nSNP | $\beta$     | se          | pval        |
|-----------------|-----------|---------------------------|------|-------------|-------------|-------------|
| ENSG00000173402 | DAG1      | Wald ratio                | 1    | -0.54038665 | 0.12824612  | 0.0000251   |
| ENSG00000124557 | BTN1A1    | Inverse variance weighted | 2    | -0.15936229 | 0.031648751 | 0.000000477 |
| ENSG00000172071 | EIF2AK3   | Wald ratio                | 1    | -0.28259562 | 0.063711713 | 0.00000918  |
| ENSG00000166949 | SMAD3     | Wald ratio                | 1    | -0.16906421 | 0.034683745 | 0.00000109  |
| ENSG00000197249 | SERPINA1  | Inverse variance weighted | 2    | 0.257787343 | 0.049658215 | 0.000000209 |
| ENSG00000146674 | IGFBP3    | Inverse variance weighted | 4    | 0.125318116 | 0.022447905 | 2.37E-08    |

**Table S9.** pQTL MR results for sciatica

| gene id         | gene name | method             | nSNP | $\beta$     | se          | pval        |
|-----------------|-----------|--------------------|------|-------------|-------------|-------------|
| ENSG00000173531 | MST1      | Inverse variance w | 4    | 0.067650893 | 0.013840903 | 1.01994E-06 |
| ENSG00000173402 | DAG1      | Wald ratio         | 1    | -0.78182105 | 0.164648707 | 2.05013E-06 |

**Table S10.** Candidate druggable genes for LBP, IVDD, and sciatica

| gene name | outcome | n SNP | pval_MR Egger | OR_MR Egger      | pval_Weighted median | OR_Weighted median        | pval_IVW | OR_IVW                    |
|-----------|---------|-------|---------------|------------------|----------------------|---------------------------|----------|---------------------------|
| BPTF      | LBP     | 2     |               |                  |                      |                           |          | 7.92E-07 1.63 (1.34-1.98) |
| GRK4      | LBP     | 14    | 0.36          | 1.04 (0.96-1.14) |                      | 4.62E-04 1.08 (1.04-1.13) |          | 3.44E-07 1.09 (1.06-1.13) |
| NFKBIL1   | LBP     | 3     | 0.33          | 1.16 (0.98-1.38) |                      | 8.77E-05 1.22 (1.10-1.34) |          | 7.38E-07 1.24 (1.14-1.34) |

|          |          |    |      |                  |  |          |                  |  |          |                  |
|----------|----------|----|------|------------------|--|----------|------------------|--|----------|------------------|
| P2RY13   | LBP      | 14 | 0.18 | 1.05 (0.98-1.12) |  | 1.77E-04 | 1.09 (1.04-1.14) |  | 1.96E-06 | 1.09 (1.05-1.12) |
| SLC5A6   | LBP      | 16 | 0.04 | 1.08 (1.01-1.17) |  | 1.11E-03 | 1.08 (1.03-1.13) |  | 6.48E-08 | 1.11 (1.07-1.15) |
| MANBA    | LBP      | 10 | 0.05 | 0.85 (0.74-0.98) |  | 9.34E-05 | 0.87 (0.82-0.93) |  | 2.57E-06 | 0.88 (0.83-0.93) |
| STX1A    | LBP      | 7  | 0.50 | 1.07 (0.90-1.27) |  | 1.05E-03 | 1.15 (1.06-1.25) |  | 3.53E-07 | 1.18 (1.11-1.26) |
| FGL2     | LBP      | 10 | 0.13 | 0.92 (0.84-1.01) |  | 9.64E-05 | 0.86 (0.80-0.93) |  | 4.56E-08 | 0.86 (0.81-0.91) |
| BTN1A1   | LBP      | 2  |      |                  |  |          |                  |  | 2.32E-07 | 0.84 (0.79-0.90) |
| APOE     | LBP      | 10 | 0.43 | 1.04 (0.95-1.13) |  | 3.20E-04 | 1.08 (1.04-1.13) |  | 1.43E-05 | 1.09 (1.05-1.13) |
| AKR1C2   | IVDD     | 33 | 0.00 | 0.95 (0.92-0.98) |  | 1.63E-08 | 0.94 (0.92-0.96) |  | 4.66E-12 | 0.94 (0.92-0.96) |
| CAPN10   | IVDD     | 9  | 0.04 | 1.24 (1.04-1.47) |  | 1.47E-05 | 1.25 (1.13-1.38) |  | 3.78E-07 | 1.22 (1.13-1.32) |
| CYP27B1  | IVDD     | 1  |      |                  |  |          |                  |  |          |                  |
| DLK1     | IVDD     | 9  | 0.12 | 0.81 (0.64-1.02) |  | 4.28E-07 | 0.80 (0.73-0.87) |  | 3.14E-11 | 0.80 (0.74-0.85) |
| ILKAP    | IVDD     | 8  | 0.21 | 1.17 (0.94-1.45) |  | 2.84E-04 | 1.22 (1.10-1.36) |  | 2.52E-08 | 1.27 (1.17-1.38) |
| KHK      | IVDD     | 26 | 0.22 | 0.95 (0.89-1.03) |  | 2.84E-06 | 0.93 (0.90-0.96) |  | 4.05E-08 | 0.93 (0.91-0.96) |
| MEG3     | IVDD     | 20 | 0.11 | 0.96 (0.92-1.01) |  | 3.73E-05 | 0.93 (0.90-0.96) |  | 1.43E-12 | 0.92 (0.89-0.94) |
| SLC14A1  | IVDD     | 18 | 0.11 | 0.95 (0.89-1.01) |  | 1.29E-04 | 0.91 (0.87-0.96) |  | 1.31E-08 | 0.91 (0.88-0.94) |
| SLC29A1  | IVDD     | 12 | 0.04 | 1.22 (1.04-1.44) |  | 2.05E-04 | 1.20 (1.09-1.32) |  | 6.52E-09 | 1.21 (1.14-1.30) |
| GFPT1    | IVDD     | 18 | 0.01 | 1.14 (1.05-1.24) |  | 8.73E-09 | 1.12 (1.08-1.16) |  | 8.03E-17 | 1.11 (1.08-1.14) |
| STX1A    | IVDD     | 7  | 0.25 | 1.11 (0.95-1.30) |  | 4.35E-05 | 1.18 (1.09-1.28) |  | 1.68E-08 | 1.18 (1.12-1.26) |
| CGREF1   | IVDD     | 3  | 0.33 | 0.51 (0.24-1.07) |  | 2.05E-04 | 0.67 (0.54-0.83) |  | 1.96E-06 | 0.66 (0.56-0.78) |
| DAG1     | IVDD     | 1  |      |                  |  |          |                  |  |          |                  |
| BTN1A1   | IVDD     | 2  |      |                  |  |          |                  |  | 4.77E-07 | 0.85 (0.80-0.91) |
| EIF2AK3  | IVDD     | 1  |      |                  |  |          |                  |  |          |                  |
| SMAD3    | IVDD     | 1  |      |                  |  |          |                  |  |          |                  |
| SERPINA1 | IVDD     | 1  |      |                  |  |          |                  |  |          |                  |
| IGFBP3   | IVDD     | 4  | 0.31 | 1.15 (0.94-1.40) |  | 4.47E-08 | 1.13 (1.08-1.18) |  | 2.37E-08 | 1.13 (1.08-1.18) |
| GPX1     | sciatica | 2  |      |                  |  |          |                  |  | 1.98E-07 | 1.53 (1.31-1.80) |
| MEG3     | sciatica | 20 | 0.41 | 0.97 (0.92-1.04) |  | 7.49E-03 | 0.94 (0.90-0.98) |  | 3.32E-08 | 0.92 (0.89-0.95) |
| NT5C     | sciatica | 17 | 0.01 | 1.20 (1.07-1.35) |  | 1.71E-05 | 1.15 (1.08-1.23) |  | 3.68E-09 | 1.15 (1.10-1.21) |
| SUMO2    | sciatica | 6  | 0.04 | 0.74 (0.60-0.90) |  | 2.67E-06 | 0.80 (0.72-0.87) |  | 7.67E-08 | 0.81 (0.74-0.87) |
| BMP6     | sciatica | 12 | 0.47 | 1.06 (0.91-1.24) |  | 4.97E-03 | 1.16 (1.05-1.29) |  | 5.08E-07 | 1.21 (1.12-1.31) |
| STX1A    | sciatica | 7  | 0.26 | 1.14 (0.93-1.40) |  | 2.17E-04 | 1.21 (1.09-1.33) |  | 2.13E-08 | 1.24 (1.15-1.34) |
| MST1     | sciatica | 4  | 0.30 | 1.05 (0.98-1.11) |  | 5.94E-05 | 1.06 (1.03-1.09) |  | 1.02E-06 | 1.07 (1.04-1.10) |
| DAG1     | sciatica | 1  |      |                  |  |          |                  |  |          |                  |

| gene name | outcome | n SNP | pval_Weighted mode | OR_Weighted mode | pval_Simple mode | OR_Simple mode | pval_Wald ratio  | OR_Wald ratio |                  |
|-----------|---------|-------|--------------------|------------------|------------------|----------------|------------------|---------------|------------------|
| BPTF      | LBP     | 2     |                    |                  |                  |                |                  |               |                  |
| GRK4      | LBP     | 14    | 1.05E-03           | 1.09 (1.05-1.13) |                  | 5.18E-02       | 1.11 (1.01-1.22) |               |                  |
| NFKBIL1   | LBP     | 3     | 6.52E-02           | 1.21 (1.10-1.34) |                  | 1.11E-01       | 1.22 (1.06-1.41) |               |                  |
| P2RY13    | LBP     | 14    | 2.46E-03           | 1.08 (1.04-1.13) |                  | 3.38E-02       | 1.07 (1.01-1.13) |               |                  |
| SLC5A6    | LBP     | 16    | 5.81E-03           | 1.09 (1.03-1.15) |                  | 4.89E-02       | 1.08 (1.01-1.16) |               |                  |
| MANBA     | LBP     | 10    | 4.04E-03           | 0.87 (0.81-0.93) |                  | 3.31E-02       | 0.86 (0.77-0.97) |               |                  |
| STX1A     | LBP     | 7     | 3.12E-02           | 1.14 (1.04-1.26) |                  | 8.38E-02       | 1.14 (1.01-1.30) |               |                  |
| FGL2      | LBP     | 10    | 4.73E-03           | 0.85 (0.77-0.92) |                  | 1.45E-02       | 0.85 (0.77-0.95) |               |                  |
| BTN1A1    | LBP     | 2     |                    |                  |                  |                |                  |               |                  |
| APOE      | LBP     | 10    | 4.80E-03           | 1.08 (1.04-1.13) |                  | 1.41E-02       | 1.15 (1.05-1.26) |               |                  |
| AKR1C2    | IVDD    | 33    | 1.72E-06           | 0.94 (0.92-0.96) |                  | 9.94E-03       | 0.95 (0.92-0.99) |               |                  |
| CAPN10    | IVDD    | 9     | 5.04E-03           | 1.25 (1.11-1.40) |                  | 2.99E-02       | 1.23 (1.06-1.44) |               |                  |
| CYP27B1   | IVDD    | 1     |                    |                  |                  |                |                  | 9.25E-07      | 0.36 (0.24-0.54) |

|          |          |    |                           |                           |                           |
|----------|----------|----|---------------------------|---------------------------|---------------------------|
| DLK1     | IVDD     | 9  | 1.46E-03 0.79 (0.72-0.87) | 2.11E-03 0.77 (0.69-0.86) |                           |
| ILKAP    | IVDD     | 8  | 1.26E-02 1.22 (1.08-1.37) | 5.20E-02 1.22 (1.03-1.43) |                           |
| KHK      | IVDD     | 26 | 9.38E-05 0.93 (0.90-0.96) | 1.65E-01 0.96 (0.90-1.02) |                           |
| MEG3     | IVDD     | 20 | 1.89E-02 0.95 (0.92-0.99) | 2.71E-03 0.88 (0.81-0.94) |                           |
| SLC14A1  | IVDD     | 18 | 1.11E-03 0.90 (0.86-0.95) | 1.38E-02 0.88 (0.81-0.96) |                           |
| SLC29A1  | IVDD     | 12 | 1.02E-02 1.20 (1.07-1.34) | 2.97E-02 1.20 (1.04-1.39) |                           |
| GFPT1    | IVDD     | 18 | 7.27E-06 1.13 (1.09-1.17) | 1.19E-03 1.14 (1.07-1.22) |                           |
| STX1A    | IVDD     | 7  | 1.05E-02 1.19 (1.08-1.30) | 1.87E-02 1.22 (1.08-1.37) |                           |
| CGREF1   | IVDD     | 3  | 5.34E-02 0.63 (0.50-0.78) | 1.50E-01 0.72 (0.54-0.95) |                           |
| DAG1     | IVDD     | 1  |                           |                           | 2.51E-05 0.58 (0.45-0.75) |
| BTN1A1   | IVDD     | 2  |                           |                           |                           |
| EIF2AK3  | IVDD     | 1  |                           |                           | 9.18E-06 0.75 (0.67-0.85) |
| SMAD3    | IVDD     | 1  |                           |                           | 1.09E-06 0.84 (0.79-0.90) |
| SERPINA1 | IVDD     | 1  |                           |                           | 2.09E-07 1.29 (1.17-1.43) |
| IGFBP3   | IVDD     | 4  | 1.26E-02 1.13 (1.08-1.18) | 1.89E-01 1.08 (0.99-1.19) |                           |
| GPX1     | sciatica | 2  |                           |                           |                           |
| MEG3     | sciatica | 20 | 6.69E-03 0.93 (0.89-0.98) | 8.64E-02 0.92 (0.83-1.01) |                           |
| NTSC     | sciatica | 17 | 3.23E-04 1.16 (1.09-1.24) | 3.24E-02 1.12 (1.02-1.22) |                           |
| SUMO2    | sciatica | 6  | 1.04E-02 0.79 (0.70-0.89) | 8.32E-02 0.84 (0.71-0.98) |                           |
| BMP6     | sciatica | 12 | 7.40E-02 1.15 (1.00-1.32) | 1.58E-01 1.16 (0.96-1.39) |                           |
| STX1A    | sciatica | 7  | 1.59E-02 1.20 (1.08-1.34) | 3.00E-02 1.22 (1.06-1.40) |                           |
| MST1     | sciatica | 4  | 4.09E-02 1.06 (1.03-1.10) | 6.07E-02 1.06 (1.02-1.11) |                           |
| DAG1     | sciatica | 1  |                           |                           | 2.05E-06 0.46 (0.33-0.63) |

| gene name | outcome | nsnp | Q_pval | MR Egger_pval |
|-----------|---------|------|--------|---------------|
| BPTF      | LBP     | 2    |        |               |
| GRK4      | LBP     | 14   | 0.34   | 0.25          |
| NFKBIL1   | LBP     | 3    | 0.46   | 0.57          |
| P2RY13    | LBP     | 14   | 0.48   | 0.23          |
| SLC5A6    | LBP     | 16   | 0.84   | 0.53          |
| MANBA     | LBP     | 10   | 0.66   | 0.64          |
| STX1A     | LBP     | 7    | 0.58   | 0.26          |
| FGL2      | LBP     | 10   | 0.34   | 0.10          |
| BTN1A1    | LBP     | 2    |        |               |
| APOE      | LBP     | 10   | 0.74   | 0.23          |
| AKR1C2    | IVDD    | 33   | 0.72   | 0.50          |
| CAPN10    | IVDD    | 9    | 0.41   | 0.84          |
| CYP27B1   | IVDD    | 1    |        |               |
| DLK1      | IVDD    | 9    | 0.21   | 0.91          |
| ILKAP     | IVDD    | 8    | 0.86   | 0.47          |
| KHK       | IVDD    | 26   | 0.51   | 0.57          |
| MEG3      | IVDD    | 20   | 0.25   | 0.04          |
| SLC14A1   | IVDD    | 18   | 0.15   | 0.12          |
| SLC29A1   | IVDD    | 12   | 0.92   | 0.93          |
| GFPT1     | IVDD    | 18   | 0.22   | 0.56          |
| STX1A     | IVDD    | 7    | 0.54   | 0.42          |
| CGREF1    | IVDD    | 3    | 0.74   | 0.61          |
| DAG1      | IVDD    | 1    |        |               |
| BTN1A1    | IVDD    | 2    |        |               |

|          |          |    |      |      |
|----------|----------|----|------|------|
| EIF2AK3  | IVDD     | 1  |      |      |
| SMAD3    | IVDD     | 1  |      |      |
| SERPINA1 | IVDD     | 1  |      |      |
| IGFBP3   | IVDD     | 4  | 0.19 | 0.92 |
| GPX1     | sciatica | 2  |      |      |
| MEG3     | sciatica | 20 | 0.32 | 0.04 |
| NT5C     | sciatica | 17 | 0.53 | 0.46 |
| SUMO2    | sciatica | 6  | 0.80 | 0.38 |
| BMP6     | sciatica | 12 | 0.59 | 0.09 |
| STX1A    | sciatica | 7  | 0.60 | 0.42 |
| MST1     | sciatica | 4  | 0.80 | 0.52 |
| DAG1     | sciatica | 1  |      |      |

**Table S11.** Phenome-wide MR results

| Phenotype         | Collapsing model | Phenotypic category | P value | No. samples | Effect size | Effect size standard error |
|-------------------|------------------|---------------------|---------|-------------|-------------|----------------------------|
| 1072#1906#NT5C#Q8 |                  |                     |         |             |             |                            |
| TCD5#OID30294#v1# | flexdmg          | Proteomics          | 2.4E-37 | 45616       | -1.53       | 0.12                       |
| CardiometabolicII |                  |                     |         |             |             |                            |
| 1072#1906#NT5C#Q8 | flexnonsymm      | Proteomics          | 2.6E-19 | 45616       | -1.23       | 0.14                       |
| TCD5#OID30294#v1# | tr               |                     |         |             |             |                            |
| CardiometabolicII |                  |                     |         |             |             |                            |
| 1072#1906#NT5C#Q8 | ptv              | Proteomics          | 1.3E-11 | 45616       | -1.25       | 0.18                       |
| TCD5#OID30294#v1# |                  |                     |         |             |             |                            |
| CardiometabolicII |                  |                     |         |             |             |                            |
| 1072#1906#NT5C#Q8 | ptv5pcent        | Proteomics          | 1.3E-11 | 45616       | -1.25       | 0.18                       |
| TCD5#OID30294#v1# |                  |                     |         |             |             |                            |
| CardiometabolicII |                  |                     |         |             |             |                            |
| 1072#1906#NT5C#Q8 | ptvraredmg       | Proteomics          | 2.4E-37 | 45616       | -1.53       | 0.12                       |
| TCD5#OID30294#v1# |                  |                     |         |             |             |                            |
| CardiometabolicII |                  |                     |         |             |             |                            |
| 1072#1906#NT5C#Q8 | raredmg          | Proteomics          | 2.4E-27 | 45616       | -1.76       | 0.16                       |
| TCD5#OID30294#v1# |                  |                     |         |             |             |                            |
| CardiometabolicII |                  |                     |         |             |             |                            |
